# Supplementary material for: Emergent regulation of ant foraging frequency through a computationally inexpensive forager movement rule
Source: eLife. 2023 Apr 17;12:e77659. doi: 10.7554/eLife.77659 (PMC10110237; doi:10.7554/eLife.77659)
Supplement: Figure 2—source data 1. — Data used for calculation of the foragers’ empirical crop-dependent bias. All foragers’ interactions are pooled from the 3 experiments presented in Greenwald et al., 2018. Each interaction entry includes information on its location in the nest, the direction of the next interaction of the forager, and the forager’s crop load. [file elife-77659-fig2-data1.csv]

Experiment	Forager ID	Time [sec]	Colony State	Trip number	Number of Interaction	Forager's Crop after Interaction	Forager x	Forager y	Distance from entrance	Location bin	Step direction	Crop bin
A	171	3684	0.135408003	2	1	0.691145783	1426.678833	1054.906006	7.614687738	8	stay	0.7
A	171	3688	0.13619705	2	2	0.691145783	1412.87912	968.3572846	7.604878104	8	outward	0.7
A	171	3756	0.149852704	2	3	0.386342371	808.552875	640.808313	4.928861034	5	outward	0.4
A	171	3940	0.18806912	3	1	0.999999043	1369.520996	722.3418579	8.021483924	9	stay	1
A	171	3978	0.196396988	3	2	0.953522542	1451.118897	910.2388672	8.081726455	9	outward	1
A	171	4088	0.221812618	3	3	0.548960046	1036.583269	830.2059675	4.811516402	5	outward	0.5
A	171	4226	0.251787852	4	1	0.732803676	830.4468994	1106.762817	1.961715283	2	inward	0.7
A	171	4232	0.253148126	4	2	0.75650426	1008.298645	1014.262268	3.788498519	4	inward	0.8
A	171	4364	0.283636736	4	3	0.714483374	1597.564652	860.4315525	9.539885316	10	outward	0.7
A	171	4382	0.287885826	4	4	0.713659424	1303.473999	696.2976074	7.608926032	8	stay	0.7
A	171	4408	0.293908598	4	5	0.686321432	1169.639209	618.3281861	7.058730511	8	outward	0.7
A	171	4670	0.353889435	5	1	0.570340481	1263.779663	842.0100708	6.623411917	7	outward	0.6
A	171	4766	0.37365983	5	2	0.095115617	1191.171405	1028.696586	5.440870582	6	outward	0.1
A	171	4984	0.419846079	6	1	0.707188667	1193.816183	558.249761	7.617592342	8	outward	0.7
A	171	5042	0.429254585	6	2	0.628914177	1232.484253	709.9004517	6.978784602	7	inward	0.6
A	171	5056	0.43159425	6	3	0.589432373	1355.952829	684.760716	8.087501651	9	outward	0.6
A	171	5104	0.439934959	6	4	0.576356849	871.6433193	1021.37153	2.550516358	3	inward	0.6
A	171	5122	0.443453095	6	5	0.576356849	1131.828491	1117.841187	4.798556961	5	inward	0.6
A	171	5140	0.447084859	6	6	0.545279334	1174.802734	765.2370605	6.234774199	7	outward	0.5
A	171	5158	0.450911355	6	7	0.579606586	1103.591553	765.1135254	5.68618617	6	outward	0.6
A	171	5166	0.452591098	6	8	0.596228582	913.5800479	750.348114	4.502027224	5	inward	0.6
A	171	5244	0.468006193	6	9	0.312748539	900.866326	669.7072353	5.064854748	6	outward	0.3
A	171	5608	0.537307232	7	1	0.681171628	1186.362915	1009.214539	5.43143538	6	inward	0.7
A	171	5632	0.54162699	7	2	0.63174117	1338.249817	975.799469	6.90043861	7	inward	0.6
A	171	5660	0.546481125	7	3	0.698229157	1386.430664	918.1171265	7.47242592	8	stay	0.7
A	171	5668	0.547712112	7	4	0.734710473	1383.642944	912.4224854	7.461606837	8	outward	0.7
A	171	5696	0.551998491	7	5	0.718879448	1347.673706	1025.721313	6.905365191	7	inward	0.7
A	171	5742	0.559195684	7	6	0.706403752	1559.481567	614.0839233	10.08649237	11	outward	0.7
A	171	5796	0.567330744	7	7	0.671453153	1074.806752	1029.405656	4.361178854	5	outward	0.7
A	171	5806	0.568687851	7	8	0.611046009	1032.326416	1041.892334	3.944028207	4	inward	0.6
A	171	5860	0.576174379	7	9	0.587094643	1250.349487	968.2998047	6.108249783	7	inward	0.6
A	171	5872	0.577828561	7	10	0.587747679	1357.651815	797.4055583	7.604928149	8	inward	0.6
A	171	5922	0.584720987	7	11	0.469144476	1526.661743	844.9697266	8.938731449	9	stay	0.5
A	171	5958	0.590343006	7	12	0.474736767	1477.935181	803.8254395	8.631265058	9	stay	0.5
A	171	5970	0.592291912	7	13	0.47550493	1494.965576	789.3127808	8.830660128	9	inward	0.5
A	171	6000	0.597254244	7	14	0.534311286	1590.951817	678.1691458	10.07764975	11	outward	0.5
A	171	6306	0.635423163	8	1	0.302213797	966.7178345	1080.164063	3.270301475	4	outward	0.3
A	171	6342	0.639390633	8	2	0.297846272	707.8917602	1076.439307	0.934819351	1	outward	0.3
A	171	6498	0.653989066	9	1	0.31141476	1232.215594	1109.508248	5.748589628	6	outward	0.3
A	171	6524	0.65625131	9	2	0.31593759	842.8357849	1121.88031	2.068658089	3	inward	0.3
A	171	6544	0.657921059	9	3	0.31593759	1123.849365	1111.061401	4.72504882	5	inward	0.3
A	171	6636	0.664929074	9	4	0.169350614	1341.901489	880.5861206	7.175807436	8	inward	0.2
A	171	6676	0.667903505	9	5	0.191881248	1515.817627	549.1575928	10.04779736	11	inward	0.2
A	171	6774	0.675018007	9	6	0.10838221	1545.49707	126.9583969	12.85851678	13	outward	0.1
A	171	7480	0.725323416	10	1	0.634306499	883.0114136	1021.196655	2.650002667	3	inward	0.6
A	171	7550	0.731515365	10	2	0.645874414	1461.238281	860.960022	8.303996899	9	stay	0.6
A	171	7622	0.738469927	10	3	0.646137647	1459.64563	866.8911743	8.272738994	9	outward	0.6
A	171	7656	0.741741789	10	4	0.646137647	1433.163737	897.0204875	7.95134969	8	inward	0.6
A	171	7702	0.746125215	10	5	0.629269168	1549.234253	581.4860229	10.15506109	11	stay	0.6
A	171	7816	0.757422086	10	6	0.482539507	1516.820636	427.5014343	10.72491226	11	stay	0.5
A	171	7852	0.76076859	10	7	0.353000749	1510.248839	407.0580749	10.7970567	11	inward	0.4
A	171	7884	0.763487517	10	8	0.385133105	1562.651334	425.3854148	11.08056297	12	stay	0.4
A	171	7922	0.766898113	10	9	0.391863693	1388.666138	209.2364349	11.29770269	12	outward	0.4
A	171	7940	0.768520257	10	10	0.386881401	1178.860077	314.4805069	9.308653961	10	outward	0.4
A	171	8026	0.775475382	10	11	0.225980077	799.736084	668.1977539	4.657428725	5	stay	0.2
A	171	8076	0.779509361	10	12	0.246388915	779.885376	644.6087036	4.805506908	5	outward	0.2
A	171	8106	0.781941236	10	13	0.248128649	931.3334351	969.7359009	3.269523052	4	stay	0.2
A	171	8118	0.782913987	10	14	0.248128649	945.9567139	1088.597754	3.06536645	4	inward	0.2
A	171	8138	0.784559155	10	15	0.216476826	1067.098511	1100.856201	4.194337704	5	outward	0.2
A	171	8152	0.785655366	10	16	0.210146454	919.6766968	1104.67627	2.802768242	3	outward	0.2
A	171	8638	0.816361285	11	1	0.228364116	1089.790771	853.2376099	5.11284098	6	outward	0.2
A	171	8762	0.82310712	12	1	0.221944529	1181.66626	1025.296997	5.358245176	6	stay	0.2
A	171	9052	0.841134112	12	2	0.183690836	1238.719727	1047.517578	5.857728185	6	inward	0.2
A	171	9240	0.852737284	12	3	0.075014746	1578.469203	611.1815709	10.2570382	11	outward	0.1
A	171	9864	0.879910414	13	1	0.534121451	1197.030518	1088.124512	5.426981767	6	inward	0.5
A	171	9916	0.881955094	13	2	0.58578973	1377.10083	1096.02417	7.121023803	8	outward	0.6
A	171	10018	0.886065781	13	3	0.614504164	1184.717426	987.9738534	5.461623924	6	outward	0.6
A	171	10120	0.889386295	13	4	0.615770713	1061.39624	880.7111816	4.750649863	5	stay	0.6
A	171	10116	0.889286499	13	5	0.615953818	1061.872925	879.8748169	4.758466648	5	outward	0.6
A	171	10152	0.890186301	13	6	0.615679142	872.4363403	848.4174194	3.539309443	4	stay	0.6
A	171	10246	0.89266342	13	7	0.573496989	908.7831421	966.1747437	3.098456928	4	inward	0.6
A	171	10402	0.897647621	13	8	0.561877401	1196.180909	986.4984131	5.570054964	6	inward	0.6
A	180	3092	0.0479644	4	1	0.847178808	1201.249329	1123.458497	5.453415284	6	outward	0.8
A	180	3140	0.054856413	4	2	0.435519136	913.5339355	921.3754272	3.365051949	4	stay	0.4
A	180	3158	0.057162605	4	3	0.324686804	909.5195313	913.9123535	3.376218647	4	outward	0.3
A	180	3516	0.107575018	5	1	0.287077308	1385.956299	983.2503662	7.328143439	8	outward	0.3
A	180	3688	0.13619705	6	1	0.768826206	1423.432617	1068.051636	7.573726363	8	outward	0.8
A	180	3734	0.145403247	6	2	0.566445723	1097.383667	868.1446533	5.105302947	6	outward	0.6
A	180	3788	0.156324361	6	3	0.248170448	1060.566193	1015.376465	4.261309803	5	outward	0.2
A	180	4128	0.230262641	7	1	0.506172655	1414.226318	728.5895386	8.367844361	9	stay	0.5
A	180	4152	0.235357326	7	2	0.338804074	1409.69458	722.8183594	8.354564716	9	stay	0.3
A	180	4164	0.237904669	7	3	0.324856698	1416.117065	688.8084717	8.559819206	9	outward	0.3
A	180	4170	0.23917834	7	4	0.324856698	1266.881287	767.5619202	6.96634927	7	outward	0.3
A	180	4174	0.240056722	7	5	0.324856698	1149.591309	799.2799072	5.860477535	6	outward	0.3
A	180	4358	0.28220742	8	1	0.788154707	1406.530029	1065.16687	7.416695043	8	outward	0.8
A	180	4372	0.28554249	8	2	0.807516063	1336.739746	1053.532227	6.770506819	7	outward	0.8
A	180	4452	0.304332169	9	1	0.698210698	1343.008423	866.4894409	7.230243498	8	inward	0.7
A	180	4554	0.327213762	9	2	0.300195009	1520.730672	792.0338542	9.04877859	10	inward	0.3
A	180	4582	0.334316808	9	3	0.306616503	1634.425049	774.6843872	10.11426662	11	outward	0.3
A	180	4620	0.343233047	9	4	0.266240865	926.1634826	163.8708496	9.551801335	10	outward	0.3
A	180	4854	0.393001514	10	1	0.885299506	1210.198364	783.506958	6.42712362	7	inward	0.9
A	180	4870	0.396609592	10	2	0.950072528	1450.075684	599.4255371	9.268542204	10	outward	1
A	180	4894	0.401971927	10	3	0.963027163	1190.252686	706.7618408	6.671728296	7	outward	1
A	180	4968	0.417044721	10	4	0.620236279	946.7513428	672.9326782	5.276813202	6	outward	0.6
A	180	4988	0.420477125	10	5	0.60046223	893.1702271	779.8865356	4.163312667	5	outward	0.6
A	180	5122	0.443453095	11	1	0.917997912	1216.865356	1075.278076	5.623505393	6	inward	0.9
A	180	5194	0.457993451	11	2	0.652872899	1347.985352	964.0101929	7.014264019	8	stay	0.7
A	180	5296	0.477681233	11	3	0.281565588	1348.026001	963.1546631	7.016436748	8	outward	0.3
A	180	5548	0.526626641	12	1	0.860539327	1242.968018	1050.061524	5.894430673	6	inward	0.9
A	180	5588	0.533681712	12	2	0.864183426	1130.321045	671.555603	6.445020599	7	outward	0.9
A	180	5702	0.552855509	12	3	0.652507411	763.8956299	723.6351929	4.049553065	5	inward	0.7
A	180	5764	0.562526526	12	4	0.510519721	1359.592773	1069.108765	6.971767265	7	inward	0.5
A	180	5784	0.565529163	12	5	0.428444343	1396.357056	920.6958618	7.556468392	8	stay	0.4
A	180	5810	0.5692428	12	6	0.405898978	1397.805176	936.1906128	7.532984143	8	inward	0.4
A	180	5834	0.572590317	12	7	0.639117923	1454.237427	897.9450073	8.140553141	9	inward	0.6
A	180	5902	0.581964017	12	8	0.630098892	1451.708862	509.9103699	9.763151007	10	inward	0.6
A	180	5974	0.592941548	12	9	0.458247514	1482.254028	391.2297668	10.69017146	11	stay	0.5
A	180	6010	0.598897885	12	10	0.433806733	1449.854004	337.5137024	10.80458236	11	outward	0.4
A	180	6040	0.603626832	12	11	0.437149132	1438.03479	641.3331299	8.963315003	9	stay	0.4
A	180	6044	0.604242002	12	12	0.438690488	1437.16272	641.2948608	8.956434675	9	inward	0.4
A	180	6078	0.609275021	12	13	0.306156893	1629.889038	971.2334595	9.61804236	10	stay	0.3
A	180	6102	0.61221712	12	14	0.360174917	1676.351929	1032.424805	9.9826332	10	inward	0.4
A	180	6148	0.617156282	12	15	0.371186007	1633.34021	439.007782	11.54870575	12	inward	0.4
A	180	6220	0.625385686	12	16	0.279042823	1634.925537	74.72910309	13.79650042	14	outward	0.3
A	180	6498	0.653989066	13	1	0.922337207	1259.708984	964.4239502	6.202995872	7	outward	0.9
A	180	6524	0.65625131	13	2	0.930762109	780.4959106	1045.418579	1.675669893	2	outward	0.9
A	180	6558	0.659082428	14	1	0.930762109	1232.823364	923.3804932	6.07009457	7	outward	0.9
A	180	6586	0.661237184	14	2	0.915087557	924.5331421	689.9610596	5.024872734	6	outward	0.9
A	180	6600	0.662257383	14	3	0.909862706	957.0778809	804.9796753	4.388787432	5	inward	0.9
A	180	6680	0.668203102	14	4	0.57474509	1125.432495	765.2144165	5.851340015	6	stay	0.6
A	180	6706	0.670150481	14	5	0.579246353	1142.129517	790.8082886	5.844217763	6	outward	0.6
A	180	6742	0.672756712	14	6	0.484011936	963.0714722	963.8412476	3.562456403	4	outward	0.5
A	180	6882	0.683117234	15	1	0.779650166	982.524353	839.5303345	4.352191723	5	stay	0.8
A	180	6942	0.687994665	15	2	0.827446964	1067.333252	921.2642212	4.624526432	5	inward	0.8
A	180	6982	0.690748087	15	3	0.719364942	1396.248657	895.401062	7.621153804	8	stay	0.7
A	180	6996	0.691737204	15	4	0.706781949	1434.375366	883.7856445	7.997639572	8	stay	0.7
A	180	7020	0.693386416	15	5	0.731321528	1384.11731	930.0177002	7.422125436	8	outward	0.7
A	180	7050	0.695512403	15	6	0.73922036	764.472168	1070.005615	1.439089964	2	outward	0.7
A	180	7334	0.713315507	16	1	0.214213092	1160.744629	969.0839844	5.290404188	6	outward	0.2
A	180	7642	0.740407703	17	1	0.697124316	1003.433306	151.4314008	9.904183301	10	stay	0.7
A	180	7648	0.740979454	17	2	0.6815254	991.9443403	144.9569713	9.922682476	10	stay	0.7
A	180	7688	0.744791129	17	3	0.733970887	1043.092163	227.0818634	9.393308304	10	stay	0.7
A	180	7726	0.748425158	17	4	0.699694191	854.9432373	196.1096497	9.076869479	10	outward	0.7
A	180	7766	0.752310021	17	5	0.692300116	822.2093506	471.1496277	6.488813698	7	outward	0.7
A	180	7822	0.758039212	17	6	0.549300065	864.9041748	584.041687	5.627161531	6	inward	0.5
A	180	7846	0.760265419	17	7	0.541355605	986.6466675	458.6457825	7.198383831	8	inward	0.5
A	180	7862	0.76160721	17	8	0.537980697	1008.333679	222.9851532	9.295318604	10	stay	0.5
A	180	7906	0.765462072	17	9	0.536293261	1434.636841	483.0140686	9.790741696	10	inward	0.5
A	180	7928	0.767436628	17	10	0.536293261	1435.795532	293.1751709	11.00551725	12	outward	0.5
A	180	7958	0.770102598	17	11	0.523797447	1303.602295	307.5222168	10.07013967	11	stay	0.5
A	180	7976	0.771534991	17	12	0.522012331	1487.422143	408.4308319	10.62242579	11	outward	0.5
A	180	8040	0.776591614	17	13	0.522012331	1290.113892	830.3059692	6.895624997	7	outward	0.5
A	180	8218	0.790817106	18	1	0.731556363	704.3373413	1121.80542	0.762269293	1	inward	0.7
A	180	8238	0.792285788	18	2	0.737949849	1104.552002	1039.059814	4.618335941	5	stay	0.7
A	180	8264	0.794132027	18	3	0.724022557	1109.580811	1043.566895	4.657485354	5	inward	0.7
A	180	8298	0.796562743	18	4	0.722418106	1200.78064	1101.148438	5.455031926	6	stay	0.7
A	180	8322	0.798299928	18	5	0.741291095	1167.98291	1064.98938	5.174232671	6	outward	0.7
A	180	8366	0.801142871	18	6	0.743987236	948.4594116	802.458374	4.347645531	5	inward	0.7
A	180	8376	0.801752894	18	7	0.743987236	1134.082642	840.6067505	5.534771964	6	stay	0.7
A	180	8388	0.802511211	18	8	0.743987236	1141.713989	955.8184204	5.156705851	6	inward	0.7
A	180	8428	0.804494795	18	9	0.728415404	1246.459229	939.838562	6.145318684	7	stay	0.7
A	180	8440	0.805120316	18	10	0.727303169	1300.634521	866.3450928	6.856094496	7	inward	0.7
A	180	8492	0.807978394	18	11	0.727303169	1368.052856	872.7318726	7.433522605	8	stay	0.7
A	180	8536	0.810530106	18	12	0.729128528	1367.334473	919.3614153	7.29552336	8	outward	0.7
A	180	8734	0.82156948	19	1	0.894413063	1252.134033	884.7922974	6.365951688	7	outward	0.9
A	180	8762	0.82310712	19	2	0.873249817	1236.955322	965.1403198	5.993404224	6	stay	0.9
A	180	8810	0.82597029	19	3	0.805439326	1161.677612	885.1104736	5.576849536	6	inward	0.8
A	180	8878	0.830604648	19	4	0.754804194	1467.967529	471.1882935	10.10718198	11	inward	0.8
A	180	8990	0.837539469	19	5	0.656538696	1367.557007	111.0079651	11.90706818	12	stay	0.7
A	180	9038	0.840341345	19	6	0.58798896	1345.58728	86.04004669	11.97901177	12	stay	0.6
A	180	9068	0.842067709	19	7	0.565308173	1362.151001	123.6301575	11.78070666	12	stay	0.6
A	180	9100	0.844060333	19	8	0.628285422	1301.907715	150.1351624	11.24636868	12	outward	0.6
A	180	9186	0.849306376	19	9	0.62013148	1101.914551	212.0879364	9.766048018	10	inward	0.6
A	180	9310	0.857000317	19	10	0.415085903	1017.767517	107.2362289	10.34238365	11	outward	0.4
A	180	9428	0.86273094	19	11	0.398349321	933.1624146	352.1387024	7.896882355	8	inward	0.4
A	180	9504	0.865222526	19	12	0.413525619	1302.240112	336.1816711	9.854711854	10	inward	0.4
A	180	9544	0.866613743	19	13	0.364600351	1435.260254	359.5916748	10.56090859	11	outward	0.4
A	180	9666	0.871750979	19	14	0.223099201	710.9764737	1084.492848	0.922713556	1	outward	0.2
A	180	9874	0.880201902	20	1	0.985600882	869.4929199	956.3068237	2.834824456	3	outward	1
A	180	10028	0.886439031	21	1	0.729772939	956.5469971	834.5328979	4.19520794	5	inward	0.7
A	180	10036	0.886737632	21	2	0.716981504	1024.046509	756.4801636	5.162922347	6	outward	0.7
A	180	10084	0.888383443	21	3	0.663989403	963.0643921	770.9507446	4.657319275	5	outward	0.7
A	180	10402	0.897647621	22	1	0.960039633	1272.822998	1019.437195	6.215794261	7	outward	1
A	180	10436	0.899024813	22	2	0.935743199	1213.379517	1056.693359	5.609329438	6	inward	0.9
A	180	10454	0.899873696	22	3	0.891297496	1304.829956	1053.846924	6.470507822	7	stay	0.9
A	207	4382	0.287885826	3	1	1	1220.027039	755.9690704	6.641504511	7	inward	1
A	207	4476	0.309754711	3	2	0.794897418	1591.192749	829.3689575	9.564516563	10	outward	0.8
A	207	4502	0.315687181	3	3	0.745385266	813.810185	834.3333218	3.310020581	4	outward	0.7
A	207	4680	0.355978404	4	1	0.924898182	1456.297607	882.1754761	8.200380297	9	outward	0.9
A	207	4696	0.359299495	4	2	0.959432557	1351.394043	781.9855957	7.612645196	8	outward	1
A	207	4726	0.36551696	4	3	0.914588779	1151.90686	768.9476929	6.035638201	7	stay	0.9
A	207	4820	0.385349859	4	4	0.89454723	1236.080688	735.3482666	6.87388881	7	outward	0.9
A	207	4904	0.404031032	4	5	0.77034528	1114.993094	919.1911273	5.043522029	6	inward	0.8
A	207	4918	0.406898848	4	6	0.75665613	1278.01001	1057.385518	6.215032751	7	stay	0.8
A	207	4942	0.411804866	4	7	0.804778205	1245.553345	885.3609009	6.306089277	7	stay	0.8
A	207	4976	0.418583987	4	8	0.720393137	1207.833008	722.9642944	6.717080622	7	outward	0.7
A	207	4988	0.420477125	4	9	0.768580451	965.958252	737.6433716	4.908441904	5	outward	0.8
A	207	5152	0.449635857	4	10	0.2400432	826.6240234	773.5380249	3.863953443	4	outward	0.2
A	207	5410	0.499278739	5	1	0.553325026	1034.440918	997.4060059	4.071463804	5	inward	0.6
A	207	5566	0.529887257	5	2	0.250057225	1272.924561	934.5699463	6.399034163	7	outward	0.3
A	207	5580	0.532226626	5	3	0.24524345	1253.934814	1085.905762	5.964656951	6	outward	0.2
A	207	5616	0.538737931	5	4	0.086145979	771.8604126	1089.216873	1.446478152	2	outward	0.1
A	207	5970	0.592291912	6	1	0.776366178	1378.46342	813.0353801	7.726305526	8	inward	0.8
A	207	6056	0.606087513	6	2	0.689872932	1664.482413	490.1957116	11.53260731	12	inward	0.7
A	207	6068	0.607900369	6	3	0.680262598	1722.76359	484.9379781	12.03028848	13	outward	0.7
A	207	6124	0.614679552	6	4	0.604150204	1197.525024	939.835083	5.704617489	6	outward	0.6
A	207	6136	0.615938282	6	5	0.593277004	940.868042	1026.520996	3.145819132	4	inward	0.6
A	207	6194	0.622251742	6	6	0.593277004	1250.468506	1017.884969	6.010216253	7	stay	0.6
A	207	6228	0.626324867	6	7	0.586701191	1241.640503	875.7590942	6.305516234	7	inward	0.6
A	207	6324	0.637340293	6	8	0.586195368	1683.747437	499.943512	11.64082976	12	stay	0.6
A	207	6428	0.648047109	6	9	0.264350708	1542.395508	284.1350403	11.78705422	12	outward	0.3
A	207	7016	0.693110481	8	1	0.71802626	1220.296997	1122.57959	5.633412895	6	inward	0.7
A	207	7140	0.701863023	8	2	0.653681411	1674.519775	1006.625671	9.990622078	10	stay	0.7
A	207	7284	0.71048518	8	3	0.705455014	1613.946777	1159.566528	9.356008738	10	outward	0.7
A	207	7450	0.722552967	8	4	0.611088837	1089.567261	940.6713867	4.743864048	5	inward	0.6
A	207	7492	0.72630581	8	5	0.639441621	1253.598999	837.8842773	6.552031567	7	outward	0.6
A	207	7524	0.729041289	8	6	0.602539359	1178.790161	828.4227905	5.960031421	6	inward	0.6
A	207	7726	0.748425158	8	7	0.457596791	1513.80481	591.505188	9.819237923	10	inward	0.5
A	207	7906	0.765462072	8	8	0.331777122	1277.120972	193.6268463	10.77541292	11	inward	0.3
A	207	7922	0.766898113	8	9	0.329843171	1322.506226	194.7606049	11.01791049	12	outward	0.3
A	207	7928	0.767436628	8	10	0.329843171	1294.102661	213.2322083	10.71806511	11	stay	0.3
A	207	7978	0.771685827	8	11	0.331423622	1532.150879	564.0194092	10.10266566	11	inward	0.3
A	207	8038	0.776429589	8	12	0.331621178	1515.536865	104.6404495	12.82689356	13	outward	0.3
A	207	8074	0.779347236	8	13	0.307116589	1487.445435	392.3147888	10.72075589	11	outward	0.3
A	207	8088	0.780482111	8	14	0.302215671	1284.537842	405.2742004	9.25489112	10	stay	0.3
A	207	8114	0.782589736	8	15	0.29447678	1050.782031	177.4392181	9.850040979	10	outward	0.3
A	207	8142	0.784886333	8	16	0.293371224	821.3990784	212.4268456	8.855221125	9	outward	0.3
A	207	8628	0.815779056	9	1	0.734995866	855.6731872	378.3872325	7.419155651	8	inward	0.7
A	207	8664	0.817792378	9	2	0.758060277	1001.960815	265.141449	8.905795652	9	outward	0.8
A	207	8746	0.822203869	9	3	0.783880088	1003.680176	385.2374573	7.887055871	8	inward	0.8
A	207	8828	0.827221159	9	4	0.700884445	916.3748169	153.7969055	9.615683984	10	outward	0.7
A	207	8930	0.833897484	9	5	0.542618277	826.1988525	433.1752625	6.843463057	7	inward	0.5
A	207	8950	0.835125249	9	6	0.55937329	855.550075	256.8813956	8.522240705	9	inward	0.6
A	207	9024	0.839548737	9	7	0.54613078	854.3007019	135.1710122	9.635236726	10	stay	0.5
A	207	9062	0.84171761	9	8	0.549926379	956.2071533	124.6819077	9.991160697	10	inward	0.5
A	207	9100	0.844060333	9	9	0.480983922	1242.848267	197.6957092	10.56133909	11	inward	0.5
A	207	9148	0.846995722	9	10	0.510618299	1476.422974	146.2176819	12.28809995	13	stay	0.5
A	207	9182	0.849050093	9	11	0.498107424	1443.248047	127.1878586	12.22366922	13	outward	0.5
A	207	9214	0.851092408	9	12	0.545139852	1353.254761	154.5309601	11.49618207	12	outward	0.5
A	207	9288	0.855703428	9	13	0.337954884	1394.910986	721.3125	8.237392011	9	outward	0.3
A	207	9312	0.857114972	9	14	0.455118224	1378.300049	822.6012573	7.690438347	8	outward	0.5
A	207	9572	0.867705011	10	1	0.448701827	1010.699951	945.3557739	4.043600585	5	outward	0.4
A	207	9776	0.876976765	10	2	0.460579904	879.0240479	958.0109253	2.899958457	3	inward	0.5
A	207	9992	0.885067504	10	3	0.469363565	892.2004395	331.4813538	7.9467926	8	outward	0.5
A	207	10094	0.888673198	10	4	0.388720047	792.0421631	1052.526172	1.743847467	2	outward	0.4
A	268	2550	0	3	1	0.776332973	950.5432739	1094.135529	3.102395832	4	stay	0.8
A	268	2560	0	3	2	0.776332973	1008.87168	1105.16018	3.642863715	4	inward	0.8
A	268	2610	0	3	3	0.573810589	1051.775146	1119.901611	4.042131293	5	outward	0.6
A	268	2842	0.023053577	4	1	0.689997624	1024.975464	1123.012451	3.78849901	4	inward	0.7
A	268	2906	0.029672212	4	2	0.480045394	1111.952759	966.0861816	4.859335984	5	outward	0.5
A	268	2954	0.034742386	4	3	0.356306438	1043.917969	1110.55542	3.970792083	4	outward	0.4
A	268	3404	0.091613902	5	1	0.708627638	1196.973877	1024.968323	5.501026967	6	inward	0.7
A	268	3496	0.104563548	5	2	0.396032852	1231.184001	914.9738091	6.0813421	7	outward	0.4
A	268	3590	0.118717455	5	3	0.113640668	1180.959747	831.0362506	5.9663813	6	outward	0.1
A	268	4128	0.230262641	6	1	0.784916705	1415.024048	923.2293701	7.720803305	8	outward	0.8
A	268	4144	0.233659098	6	2	0.780559729	1029.435523	917.0298099	4.32137249	5	outward	0.8
A	268	4172	0.239602897	6	3	0.694678892	940.7196961	1030.408025	3.133393278	4	inward	0.7
A	268	4186	0.242779674	6	4	0.677502703	1032.815796	964.1861979	4.16362011	5	stay	0.7
A	268	4198	0.245502626	6	5	0.677502703	1102.468994	908.2316895	4.977389832	5	stay	0.7
A	268	4224	0.251338907	6	6	0.664068808	944.0501099	806.9800171	4.287991015	5	stay	0.7
A	268	4232	0.253148126	6	7	0.657351888	1050.183349	951.1600037	4.362083609	5	outward	0.7
A	268	4240	0.254920235	6	8	0.657351888	993.6664734	1018.764099	3.643895219	4	stay	0.7
A	268	4248	0.256675494	6	9	0.657351888	968.8926188	1123.266805	3.258766923	4	outward	0.7
A	268	4260	0.259248235	6	10	0.657351888	836.2881266	1100.30367	2.02381098	3	stay	0.7
A	268	4270	0.261337795	6	11	0.657351888	845.5577393	917.5360718	2.892490114	3	inward	0.7
A	268	4284	0.264601328	6	12	0.657351888	888.6293488	891.5101089	3.358165311	4	inward	0.7
A	268	4392	0.290196696	6	13	0.367023133	1104.129395	928.4508667	4.914963779	5	outward	0.4
A	268	4680	0.355978404	7	1	0.647915409	1525.628401	908.7312711	8.767389577	9	outward	0.6
A	268	4696	0.359299495	7	2	0.647915409	1357.758362	1061.741272	6.960489701	7	outward	0.6
A	268	4772	0.374923174	7	3	0.525896014	1240.436768	1103.316772	5.828335682	6	inward	0.5
A	268	4794	0.379556278	7	4	0.545327815	1276.754239	998.5670554	6.288009805	7	outward	0.5
A	268	5058	0.431901123	7	5	0.005604772	805.7750346	662.1758576	4.731026202	5	outward	0
A	268	5494	0.515810334	8	1	0.799553035	1525.093872	813.6098633	9.018038594	10	outward	0.8
A	268	5586	0.53331794	8	2	0.443317275	1459.551927	816.5377479	8.426411629	9	stay	0.4
A	268	5638	0.542727674	8	3	0.311780328	1426.246826	687.1096802	8.651318689	9	stay	0.3
A	268	5762	0.562226263	8	4	0.332308861	1413.643433	685.6994629	8.553734387	9	stay	0.3
A	268	5810	0.5692428	8	5	0.248894793	1482.167228	927.5220424	8.326811281	9	stay	0.2
A	268	5834	0.572590317	8	6	0.320424647	1540.17334	882.4259644	8.962223801	9	outward	0.3
A	268	5898	0.581412623	8	7	0.302133844	1103.173584	783.0982666	5.581971516	6	stay	0.3
A	268	5928	0.585548078	8	8	0.256253768	1125.820068	871.9639892	5.325632106	6	outward	0.3
A	268	6020	0.600541525	8	9	0.229155184	935.4473877	1076.220337	2.984127245	3	outward	0.2
A	268	6316	0.636491081	9	1	0.672278938	1253.79364	1079.684265	5.967612759	6	outward	0.7
A	268	6350	0.640383486	9	2	0.672278938	834.6944092	763.690332	3.982575837	4	inward	0.7
A	268	6432	0.648383099	9	3	0.571966045	1515.368164	659.7282715	9.51520668	10	outward	0.6
A	268	6492	0.653451061	9	4	0.501145057	851.2507324	963.222168	2.65667307	3	outward	0.5
A	268	6816	0.677834071	10	1	0.467286411	1086.058698	1026.307652	4.471276618	5	stay	0.5
A	268	6836	0.67913589	10	2	0.464648309	1050.778809	1058.133057	4.086805503	5	outward	0.5
A	268	6942	0.687994665	10	3	0.450999115	980.7533976	950.3288167	3.768721027	4	inward	0.5
A	268	6980	0.690600689	10	4	0.355880724	1139.334436	1071.148108	4.898752656	5	inward	0.4
A	268	7002	0.692144711	10	5	0.410173227	1244.012354	1000.513086	5.981265402	6	outward	0.4
A	268	7636	0.739828854	11	1	0.488620516	922.9023438	885.1372681	3.643412236	4	inward	0.5
A	268	7670	0.743075875	11	2	0.48436381	1047.291901	1090.128479	4.015595257	5	outward	0.5
A	268	7888	0.763846527	11	3	0.297876068	1013.408875	1099.786743	3.689072368	4	stay	0.3
A	268	7908	0.765641577	11	4	0.295732521	1004.123901	1074.518066	3.627628636	4	outward	0.3
A	268	8376	0.801752894	12	1	0.618468538	1121.629443	1054.811548	4.752833584	5	stay	0.6
A	268	8388	0.802511211	12	2	0.588010616	1140.61853	1043.213867	4.947051866	5	stay	0.6
A	268	8410	0.803656145	12	3	0.588010616	1133.959432	1020.918009	4.924266949	5	inward	0.6
A	268	8492	0.807978394	12	4	0.588010616	1290.889844	920.6126465	6.599873102	7	outward	0.6
A	268	8514	0.809287048	12	5	0.561712749	1231.854248	971.3462524	5.931890106	6	inward	0.6
A	268	8536	0.810530106	12	6	0.536367405	1266.250297	977.8152029	6.232669283	7	stay	0.5
A	268	8780	0.824062594	12	7	0.484810259	1268.298991	1117.684123	6.087441743	7	outward	0.5
A	268	9284	0.855468737	12	8	0.445531007	967.4632568	1036.903564	3.359077629	4	stay	0.4
A	268	9360	0.859646417	12	9	0.373378105	1013.880562	1008.729742	3.854118056	4	stay	0.4
A	268	9406	0.861762791	12	10	0.410954581	974.7556269	969.2730539	3.640474453	4	inward	0.4
A	268	9444	0.863292438	12	11	0.431596551	1084.037266	900.7485087	4.85081322	5	outward	0.4
A	268	9754	0.875966265	13	1	0.639308527	789.9892065	1138.370923	1.57099364	2	inward	0.6
A	268	9848	0.879392521	13	2	0.747591019	1083.395508	996.9817505	4.515166534	5	stay	0.7
A	268	10018	0.886065781	13	3	0.658519161	1089.480753	1012.965699	4.531622367	5	stay	0.7
A	268	10054	0.887392943	13	4	0.668918147	1041.073608	986.5522461	4.163139113	5	stay	0.7
A	268	10120	0.889386295	13	5	0.698866648	1068.908033	975.6594079	4.445220271	5	outward	0.7
A	268	10204	0.891489684	13	6	0.633946751	1004.973267	1010.687195	3.768272022	4	stay	0.6
A	268	10246	0.89266342	13	7	0.664227279	980.6021729	1054.625732	3.441141767	4	stay	0.7
A	268	10336	0.89548867	13	8	0.636813646	886.3772583	858.4592285	3.559311053	4	stay	0.6
A	268	10378	0.89686302	13	9	0.430501931	928.779773	973.8246094	3.230429596	4	stay	0.4
A	268	10422	0.898364571	13	10	0.50429823	940.8412964	979.2831299	3.310049084	4	outward	0.5
A	421	3932	0.186351899	4	1	0.853231026	1283.849731	1063.214111	6.264182031	7	outward	0.9
A	421	3954	0.191074256	4	2	0.724561141	1063.849854	1049.704956	4.222030649	5	stay	0.7
A	421	3968	0.194145014	4	3	0.55498019	1058.263184	1047.745239	4.17346221	5	outward	0.6
A	421	4170	0.23917834	5	1	0.995220139	1207.051392	812.9454346	6.264394929	7	outward	1
A	421	4174	0.240056722	5	2	0.995220139	1182.246582	838.4332275	5.944537106	6	stay	1
A	421	4186	0.242779674	5	3	0.995220139	1162.427612	887.715271	5.573201477	6	inward	1
A	421	4210	0.248196294	5	4	0.883414685	1246.133911	863.9541626	6.387664391	7	outward	0.9
A	421	4224	0.251338907	5	5	0.837337228	975.5300903	738.4919434	4.962458633	5	outward	0.8
A	421	4240	0.254920235	5	6	0.821286314	1029.102661	1036.178467	3.925931269	4	inward	0.8
A	421	4248	0.256675494	5	7	0.821286314	1083.720947	1072.866211	4.375089819	5	inward	0.8
A	421	4282	0.264130459	5	8	0.822624702	1240.822998	1012.460938	5.929808318	6	outward	0.8
A	421	4474	0.309294164	5	9	0.21054905	810.5958252	834.9884033	3.288443258	4	outward	0.2
A	421	4870	0.396609592	6	1	0.881388638	1403.773804	966.8862305	7.523428889	8	stay	0.9
A	421	4874	0.397508983	6	2	0.881388638	1365.577026	970.782959	7.162774063	8	stay	0.9
A	421	4886	0.400209731	6	3	0.881388638	1439.467651	1034.03479	7.755279237	8	stay	0.9
A	421	4912	0.405672344	6	4	0.819556242	1430.040405	1011.760315	7.694251014	8	stay	0.8
A	421	4976	0.418583987	6	5	0.747171916	1281.127075	688.4589233	7.472684114	8	stay	0.7
A	421	4980	0.419215033	6	6	0.725104891	1284.61731	670.1802979	7.597219742	8	stay	0.7
A	421	5014	0.424605431	6	7	0.740211589	1319.780793	720.9099274	7.619126727	8	outward	0.7
A	421	5522	0.521419909	7	1	0.767866943	1405.499878	1114.415771	7.383784325	8	stay	0.8
A	421	5536	0.524242846	7	2	0.770360119	1417.565755	1090.369507	7.505308211	8	outward	0.8
A	421	5548	0.526626641	7	3	0.776249403	1333.513794	1066.250122	6.72858316	7	inward	0.8
A	421	5852	0.575071591	7	4	0.320859708	1379.05896	751.4794922	7.973916654	8	inward	0.3
A	421	5872	0.577828561	7	5	0.317559793	1434.255432	743.8278199	8.474286965	9	outward	0.3
A	421	6318	0.636699557	8	1	0.587087861	878.6239124	768.3764149	4.169149356	5	stay	0.6
A	421	6474	0.651938483	8	2	0.554528759	794.0929565	713.3865356	4.240857979	5	inward	0.6
A	421	6540	0.657586329	8	3	0.531343495	1016.915955	189.498703	9.618292156	10	inward	0.5
A	421	6684	0.668502698	8	4	0.373991748	1055.390023	112.4016046	10.4305281	11	stay	0.4
A	421	6730	0.671908727	8	5	0.438828396	1055.040405	113.5864716	10.41893527	11	stay	0.4
A	421	6762	0.674170021	8	6	0.425890443	1003.447144	132.7553406	10.0688862	11	outward	0.4
A	421	6840	0.679482094	8	7	0.405497442	956.1575073	166.1725616	9.619714349	10	outward	0.4
A	421	7050	0.695512403	8	8	0.396321277	762.6060181	989.7671509	1.855160256	2	inward	0.4
A	421	7466	0.724027904	8	9	0.202939238	841.8347168	931.5180054	2.776810471	3	outward	0.2
A	421	7728	0.748620054	9	1	0.73786889	802.3322144	958.2899476	2.331333152	3	outward	0.7
A	421	8264	0.794132027	10	1	0.678321796	1179.865845	1072.368896	5.278227722	6	inward	0.7
A	421	8290	0.795978893	10	2	0.688757272	1266.233032	845.546875	6.631012013	7	stay	0.7
A	421	8334	0.799071624	10	3	0.633138626	1254.664185	840.7528687	6.54986181	7	stay	0.6
A	421	8376	0.801752894	10	4	0.63003877	1203.24939	810.2067871	6.245267905	7	outward	0.6
A	421	8410	0.803656145	10	5	0.63003877	1035.97937	1020.191711	4.02511517	5	inward	0.6
A	421	8512	0.80916808	10	6	0.622061271	1337.690674	987.5626831	6.872834951	7	outward	0.6
A	421	8566	0.812195652	10	7	0.620921628	1024.744629	852.0986328	4.600808564	5	inward	0.6
A	421	8702	0.81986978	10	8	0.607568376	1395.502578	1037.628016	7.338858711	8	outward	0.6
A	421	8734	0.82156948	10	9	0.621995644	1292.614868	943.149353	6.555281514	7	outward	0.6
A	421	8952	0.83524596	10	10	0.57409424	1163.979736	965.368103	5.3297645	6	outward	0.6
A	421	8982	0.837056625	10	11	0.572113938	1044.048706	951.5338745	4.307280888	5	outward	0.6
A	421	9712	0.873846173	11	1	0.574179298	1037.935913	1107.721069	3.915613746	4	inward	0.6
A	421	9804	0.878012911	11	2	0.551182857	1109.293286	955.8535156	4.8671083	5	inward	0.6
A	421	9848	0.879392521	11	3	0.596736722	1159.976013	953.0832443	5.328588501	6	outward	0.6
A	421	10436	0.899024813	12	1	0.591370581	1135.675659	1082.861084	4.853255112	5	inward	0.6
B	148	5372	0.16870068	2	1	0.611660195	1535.888123	867.2747498	7.654657705	8	outward	0.6
B	148	5553	0.19114688	3	1	0.560301068	1495.863851	802.7959595	7.671861217	8	outward	0.6
B	148	5617	0.199909597	3	2	0.420731042	895.8754069	823.823032	4.48591723	5	outward	0.4
B	148	5832	0.228508251	4	1	0.631573555	1373.27771	702.5012207	7.44170542	8	inward	0.6
B	148	5858	0.231984525	4	2	0.579440297	1282.732647	130.9711468	10.99665809	11	outward	0.6
B	148	5922	0.240476005	4	3	0.440632747	1302.965698	773.7262573	6.611946163	7	outward	0.4
B	148	5982	0.248458738	4	4	0.281052821	1110.67981	860.5386963	5.022478049	6	outward	0.3
B	148	6219	0.279041771	5	1	0.642809624	1440.167847	769.7053223	7.473607484	8	stay	0.6
B	148	6219	0.279041771	5	2	0.642809624	1440.167847	769.7053223	7.473607484	8	inward	0.6
B	148	6230	0.280433216	5	3	0.63626943	923.0028076	275.7800293	8.973659639	9	inward	0.6
B	148	6240	0.281726096	5	4	0.63626943	1175.673584	284.169281	9.480348574	10	outward	0.6
B	148	6447	0.30828804	6	1	0.620137253	1065.641235	350.4876709	8.650881009	9	inward	0.6
B	148	6461	0.310199593	6	2	0.581091921	1356.099884	171.3248901	10.95936511	11	inward	0.6
B	148	6523	0.31857876	6	3	0.11472103	1909.387817	513.1254272	11.85750132	12	stay	0.1
B	148	6521	0.318316623	6	4	0.134765206	1906.616211	513.1407471	11.83872478	12	outward	0.1
B	148	6737	0.346574287	7	1	0.776594604	1427.739746	737.1520996	7.570839791	8	stay	0.8
B	148	6765	0.350386739	7	2	0.645927087	1456.380981	736.52771	7.753379232	8	stay	0.6
B	148	6817	0.357658484	7	3	0.356276591	1344.596558	732.4855957	7.097727333	8	stay	0.4
B	148	6820	0.358080729	7	4	0.33257458	1345.519775	732.9465332	7.10036724	8	outward	0.3
B	148	7167	0.402866138	8	1	0.734000357	1663.09375	231.6088104	11.9548832	12	outward	0.7
B	148	7228	0.410396838	8	2	0.462451704	1012.321533	834.519104	4.76625731	5	inward	0.5
B	148	7239	0.411717867	8	3	0.45628015	1126.247925	282.5785217	9.346088111	10	inward	0.5
B	148	7284	0.417122078	8	4	0.404029921	1558.323771	296.9142609	10.9890935	11	outward	0.4
B	148	7557	0.448162062	9	1	0.453001608	1806.592529	692.6484985	10.32447582	11	stay	0.5
B	148	7559	0.448361402	9	2	0.447230659	1840.289917	710.637207	10.48829572	11	stay	0.4
B	148	7529	0.445412123	9	3	0.53379489	1819.06189	694.909668	10.40305709	11	outward	0.5
B	148	7569	0.449380763	9	4	0.444345185	1312.747559	1053.754761	5.285366076	6	outward	0.4
B	148	7768	0.470126338	10	1	0.475277597	1578.041531	173.404794	11.9083433	12	stay	0.5
B	148	7783	0.471702283	10	2	0.370436939	1533.80197	160.570613	11.78776733	12	stay	0.4
B	148	7835	0.477055491	10	3	0.006989377	1380.438159	116.0787854	11.4588359	12	outward	0
B	148	8302	0.530583028	11	1	0.610934429	1454.061081	170.8705216	11.36099951	12	stay	0.6
B	148	8330	0.533744424	11	2	0.613913704	1438.655518	183.4510803	11.20578671	12	outward	0.6
B	148	8387	0.540182575	11	3	0.614043237	1274.668945	1200.297974	4.550065353	5	inward	0.6
B	148	8457	0.547113752	11	4	0.48403958	2022.943165	885.5952921	11.2556221	12	outward	0.5
B	148	8747	0.57485708	12	1	0.659500346	1494.091431	181.2803955	11.46363084	12	stay	0.7
B	148	8941	0.593206861	12	2	0.119932701	1330.503945	61.12315492	11.68729775	12	stay	0.1
B	148	8846	0.584278587	12	3	0.406160457	1348.89497	70.06638882	11.68443028	12	outward	0.4
B	148	9328	0.629350523	13	1	0.598141862	1289.489258	1172.254272	4.733220177	5	outward	0.6
B	148	9434	0.639262706	14	1	0.364105771	1286.656372	538.0065308	8.047597593	9	stay	0.4
B	148	9449	0.64078071	14	2	0.319367518	1205.937622	448.975647	8.342749537	9	outward	0.3
B	148	9892	0.679968173	15	1	0.172883719	1422.062256	156.5132446	11.32922149	12	outward	0.2
B	148	9946	0.683668409	15	2	0.097111708	1015.388082	730.8886515	5.551423948	6	stay	0.1
B	148	9969	0.685121235	15	3	0.085822134	1009.250183	715.2330322	5.650458986	6	outward	0.1
B	148	10356	0.709643692	16	1	0.618688583	1955.445923	1292.53479	10.04564482	11	inward	0.6
B	148	10422	0.713898031	16	2	0.509578199	1985.765259	737.3283081	11.44962139	12	inward	0.5
B	148	10448	0.715579643	16	3	0.676177737	2044.571435	702.703479	12.01376748	13	outward	0.7
B	148	10587	0.724685106	17	1	0.65513668	1395.812793	1115.742993	5.717544568	6	inward	0.7
B	148	10615	0.726538287	17	2	0.570758156	1675.070252	766.0761414	9.076814216	10	inward	0.6
B	148	10652	0.729057171	17	3	0.603799678	1873.765625	212.2686768	13.24935657	14	outward	0.6
B	148	10677	0.730531784	17	4	0.608683223	1423.981934	1122.577637	5.920730181	6	outward	0.6
B	148	11072	0.75095893	19	1	0.682852421	1111.976807	925.7753906	4.61008017	5	inward	0.7
B	148	11125	0.75359824	19	2	0.652624313	1088.809082	468.2644959	7.795754076	8	inward	0.7
B	148	11186	0.756464829	19	3	0.496961088	1131.741211	319.3642883	9.075679608	10	inward	0.5
B	148	11257	0.759746649	19	4	0.299936664	2026.72268	919.5049805	11.19370565	12	outward	0.3
B	148	11389	0.765664199	19	5	0.11125603	1731.17688	1119.946777	8.384657997	9	outward	0.1
B	148	11401	0.766225685	19	6	0.153254726	1616.973487	992.4207521	7.794155515	8	outward	0.2
B	148	11888	0.789424216	20	1	0.798677863	1025.109363	602.6462768	6.56620336	7	stay	0.8
B	148	11946	0.792415718	20	2	0.514946902	1017.709045	609.3980103	6.492245825	7	outward	0.5
B	148	12240	0.806189628	21	1	0.691595525	1822.581868	597.5940144	10.8660335	11	inward	0.7
B	148	12283	0.808004966	21	2	0.642311101	1918.53418	581.1148682	11.60292699	12	stay	0.6
B	148	12290	0.80829367	21	3	0.639949973	1870.036865	576.2567749	11.29049456	12	stay	0.6
B	148	12319	0.809531671	21	4	0.695265321	1820.701904	508.0235596	11.2927914	12	outward	0.7
B	148	12521	0.818445666	21	5	0.004116911	1161.053833	1183.683228	3.696054726	4	inward	0
B	148	12944	0.836865836	23	1	0.780923444	1276.533936	847.9708252	6.025149095	7	stay	0.8
B	148	12968	0.837900133	23	2	0.753662676	1442.310303	892.7247314	6.884631753	7	inward	0.8
B	148	12993	0.83900869	23	3	0.580871623	1902.03093	1061.185379	9.875118615	10	outward	0.6
B	148	13011	0.839806392	23	4	0.754721279	1780.096151	1040.917582	8.9418667	9	inward	0.8
B	148	13025	0.840426827	23	5	0.781561551	1848.798706	907.7197876	9.839569076	10	inward	0.8
B	148	13146	0.846339777	23	6	0.725779226	1217.368408	195.8595123	10.28888031	11	stay	0.7
B	148	13178	0.847890601	23	7	0.634703929	1217.829102	196.7890167	10.28321091	11	outward	0.6
B	148	13195	0.848714477	23	8	0.631802751	1077.348267	233.9160461	9.602554094	10	outward	0.6
B	148	13211	0.849491561	23	9	0.707669915	1024.236412	750.3987871	5.434718324	6	inward	0.7
B	148	13257	0.85173825	23	10	0.720314454	1255.366943	787.5042725	6.257437236	7	stay	0.7
B	148	13257	0.85173825	23	11	0.720314454	1255.366943	787.5042725	6.257437236	7	inward	0.7
B	148	13519	0.864764	23	12	0.191229118	1310.514038	318.3756409	9.706317104	10	outward	0.2
B	148	14035	0.88667164	24	1	0.470251921	1791.242505	430.9191162	11.51055969	12	stay	0.5
B	148	14034	0.886629595	24	2	0.47456258	1781.996875	435.910138	11.42560784	12	stay	0.5
B	148	14049	0.887260267	24	3	0.470251921	1734.542542	343.5263215	11.66383531	12	stay	0.5
B	148	14125	0.890799467	24	4	0.470251921	1833.050598	429.1966248	11.78318805	12	outward	0.5
B	148	14151	0.892052894	24	5	0.470251921	1225.00769	1032.33664	4.743268921	5	inward	0.5
B	148	14208	0.894736157	24	6	0.426068897	928.7197876	148.0568695	10.02674177	11	outward	0.4
B	148	14301	0.899137156	24	7	0.224195108	1032.382559	427.3696043	7.959851622	8	stay	0.2
B	424	3311	0	2	1	1	1056.943359	632.0163574	6.440475761	7	outward	1
B	424	3370	0	2	2	0.655285173	1208.54248	911.2605591	5.255032505	6	outward	0.7
B	424	3562	0.008107983	3	1	0.635613588	1370.694092	903.8394165	6.340649725	7	stay	0.6
B	424	3633	0.013086309	3	2	0.509622628	1501.816162	1294.577393	6.288924109	7	stay	0.5
B	424	3659	0.015033654	3	3	0.274149735	1502.277466	1295.040894	6.292494736	7	stay	0.3
B	424	3659	0.015033654	3	4	0.274149735	1502.277466	1295.040894	6.292494736	7	stay	0.3
B	424	3650	0.014489058	3	5	0.3556596	1497.197998	1293.670898	6.251207301	7	outward	0.4
B	424	4038	0.031597624	4	1	0.282152016	1286.532471	1308.350708	4.500424965	5	outward	0.3
B	424	4043	0.032074654	4	2	0.272626179	1000.210693	1247.952515	2.260261756	3	outward	0.3
B	424	4255	0.050188732	5	1	0.229240541	1128.115112	947.5894165	4.567889782	5	stay	0.2
B	424	4255	0.050188732	5	2	0.229240541	1128.115112	947.5894165	4.567889782	5	outward	0.2
B	424	4506	0.074784551	6	1	0.295164641	1375.547363	1071.58252	5.693947999	6	stay	0.3
B	424	4522	0.076323796	6	2	0.092111157	1372.784546	1065.073364	5.694572324	6	stay	0.1
B	424	4506	0.074784551	6	3	0.295164641	1375.547363	1071.58252	5.693947999	6	outward	0.3
B	424	4776	0.101100407	7	1	0.069852016	1133.796509	1185.69812	3.479701442	4	stay	0.1
B	424	4755	0.099122245	7	2	0.283237928	1134.254639	1188.491699	3.47459477	4	stay	0.3
B	424	4776	0.101100407	7	3	0.069852016	1133.796509	1185.69812	3.479701442	4	stay	0.1
B	424	4786	0.102042389	7	4	0.059690785	915.6676025	913.9676108	3.831608636	4	outward	0.1
B	424	5062	0.130999997	8	1	0.011880044	1456.181152	1223.061523	5.981327533	6	inward	0
B	424	5054	0.130104743	8	2	0.106920405	1474.183105	1233.2146	6.115397449	7	stay	0.1
B	424	5054	0.130104743	8	3	0.106920405	1474.183105	1233.2146	6.115397449	7	stay	0.1
B	424	5054	0.130104743	8	4	0.106920405	1474.183105	1233.2146	6.115397449	7	outward	0.1
B	424	5332	0.163923163	9	1	0.088603508	1076.971069	850.9385376	4.924597077	5	stay	0.1
B	424	5315	0.161892719	9	2	0.239229472	1087.103394	873.2518311	4.821306298	5	stay	0.2
B	424	5315	0.161892719	9	3	0.239229472	1087.103394	873.2518311	4.821306298	5	stay	0.2
B	424	5326	0.163206536	9	4	0.141765613	1085.261353	869.067749	4.84047316	5	stay	0.1
B	424	5326	0.163206536	9	5	0.141765613	1085.261353	869.067749	4.84047316	5	stay	0.1
B	424	5339	0.164759229	9	6	0.026581052	1074.672729	842.5627441	4.971813432	5	stay	0
B	424	5341	0.164998104	9	7	0.008860351	1071.443604	839.3184204	4.979690915	5	outward	0
B	424	5557	0.19169455	10	1	0.173517346	1048.173462	1306.127075	2.533784558	3	stay	0.2
B	424	5576	0.194295981	10	2	0.008675867	1050.944214	1306.857422	2.555861432	3	stay	0
B	424	5576	0.194295981	10	3	0.008675867	1050.944214	1306.857422	2.555861432	3	outward	0
B	424	5855	0.231581956	11	1	0.277837163	1077.762451	948.3339233	4.283263406	5	stay	0.3
B	424	5855	0.231581956	11	2	0.277837163	1077.762451	948.3339233	4.283263406	5	stay	0.3
B	424	5889	0.236144402	11	3	0.007938205	1071.758423	947.4350586	4.257100482	5	outward	0
B	424	6113	0.265699087	12	1	0.011758383	1023.231384	964.4804077	3.898203622	4	stay	0
B	424	6100	0.26406272	12	2	0.164617375	1014.908752	970.1187744	3.819780024	4	stay	0.2
B	424	6113	0.265699087	12	3	0.011758383	1023.231384	964.4804077	3.898203622	4	outward	0
B	424	6423	0.305011092	13	1	0.537595712	1463.855591	1014.704773	6.554499349	7	stay	0.5
B	424	6423	0.305011092	13	2	0.537595712	1463.855591	1014.704773	6.554499349	7	stay	0.5
B	424	6465	0.310745751	13	3	0.197031687	1398.249878	1022.058044	6.036887198	7	outward	0.2
B	424	6474	0.311974606	13	4	0.113189775	1391.777588	1025.822021	5.974965462	6	inward	0.1
B	424	6465	0.310745751	13	5	0.197031687	1398.249878	1022.058044	6.036887198	7	outward	0.2
B	424	6475	0.312111146	13	6	0.103874002	1387.611816	1031.903442	5.921821099	6	outward	0.1
B	424	6835	0.360179521	14	1	0.219116741	1541.502523	1098.005005	6.911139571	7	stay	0.2
B	424	6916	0.371290015	14	2	0.004083301	938.1740609	618.6406114	6.218826241	7	outward	0
B	424	7302	0.419283763	15	1	0.795657528	1114.016113	785.0238037	5.54962867	6	inward	0.8
B	424	7395	0.430449981	15	2	0.011962999	1023.817017	533.8677979	7.098894526	8	stay	0
B	424	7385	0.429249428	15	3	0.131592997	1026.590576	532.4543457	7.117488221	8	stay	0.1
B	424	7381	0.428769206	15	4	0.179444997	1027.052612	532.4517822	7.118766405	8	outward	0.2
B	424	7649	0.457716953	16	1	0.447738825	1064.711129	1001.999264	3.878679519	4	stay	0.4
B	424	7666	0.459488393	16	2	0.449689708	939.4727402	902.8454437	3.993032727	4	inward	0.4
B	424	7736	0.46678256	16	3	0.048428122	958.9210815	359.0003052	8.352072406	9	stay	0
B	424	7742	0.467407774	16	4	0.006918303	956.6189575	353.4207153	8.393266724	9	outward	0
B	424	8093	0.506537619	17	1	0.098685237	859.1763306	333.4543762	8.426582963	9	stay	0.1
B	424	8147	0.512819521	17	2	0.001903451	824.9835205	340.1678772	8.343932886	9	outward	0
B	424	8523	0.553647906	18	1	0.321456056	1239.39209	645.4542236	7.091835767	8	stay	0.3
B	424	8557	0.556810289	18	2	0.061229728	1241.241211	644.5119629	7.107077716	8	stay	0.1
B	424	8564	0.557455965	18	3	0.007653716	1246.32959	639.3575439	7.166352865	8	outward	0
B	424	8894	0.588621087	19	1	0.208332849	846.9806431	307.9124989	8.626519389	9	stay	0.2
B	424	8887	0.587975148	19	2	0.246926072	847.2888706	307.7166167	8.628386733	9	outward	0.2
B	424	8988	0.597829946	19	3	0	935.8594805	1158.831021	2.202161847	3	stay	0
B	424	8981	0.59714074	19	4	0.00596528	940.6497248	1149.017955	2.287462113	3	stay	0
B	424	8988	0.597829946	19	5	0	935.8594805	1158.831021	2.202161847	3	outward	0
B	424	9334	0.629916222	20	1	0.215446846	1224.559299	758.2113715	6.273442713	7	outward	0.2
B	424	9380	0.634193094	20	2	0.005306346	1233.231445	1099.39917	4.526316837	5	outward	0
B	424	9661	0.660116632	21	1	0.368931489	1466.804077	884.6668091	7.091657092	8	stay	0.4
B	424	9755	0.668524254	21	2	0.135732738	818.3908081	432.4777832	7.576700677	8	stay	0.1
B	424	9759	0.668881833	21	3	0.117801928	816.0817261	432.0245056	7.57893044	8	outward	0.1
B	424	9969	0.685121235	22	1	0.496593014	950.4645996	802.7052612	4.795910627	5	inward	0.5
B	424	9988	0.686286454	22	2	0.497112315	1011.647873	608.0916901	6.485086164	7	outward	0.5
B	424	10071	0.691190726	22	3	0.410865385	971.2548156	741.1794998	5.333995406	6	outward	0.4
B	424	10128	0.694759557	22	4	0.202121814	1146.122192	954.0142212	4.635725135	5	stay	0.2
B	424	10160	0.696772686	22	5	0.061676291	1144.275024	953.5584106	4.627385402	5	outward	0.1
B	424	10367	0.710360308	23	1	0.528060311	1540.057573	1213.573686	6.680210477	7	inward	0.5
B	424	10430	0.714410274	23	2	0.212756035	1535.11377	927.1635742	7.405151752	8	inward	0.2
B	424	10465	0.716675033	23	3	0.044032715	1794.916382	1126.118652	8.89029977	9	outward	0
B	424	10908	0.74308063	24	1	0.378443769	902.2000817	427.5790026	7.704007991	8	stay	0.4
B	424	11061	0.750425447	24	2	0.152581261	1025.197754	537.5883789	7.073492053	8	outward	0.2
B	424	11432	0.767600677	25	1	0.131599863	1022.475342	1180.721313	2.667822841	3	inward	0.1
B	424	11506	0.770548883	25	2	0.002593023	859.192688	661.0716553	5.735818646	6	outward	0
B	424	11888	0.789424216	26	1	0.520716002	924.3669434	631.3515015	6.088071874	7	inward	0.5
B	424	12075	0.798885956	26	2	0.318874122	1507.473267	191.9250336	11.45044611	12	inward	0.3
B	424	12334	0.810192267	26	3	0.082127008	1928.902059	90.64126842	14.29128506	15	outward	0.1
B	424	13087	0.843480444	27	1	0.647777724	1071.151978	1053.692749	3.617711948	4	inward	0.6
B	424	13142	0.846145924	27	2	0.667467805	943.2039062	638.8901489	6.067939948	7	inward	0.7
B	424	13304	0.854048263	27	3	0.418143976	1719.313936	952.8531241	8.703759834	9	stay	0.4
B	424	13389	0.858214746	27	4	0.268338563	1771.317261	1155.608887	8.651472487	9	outward	0.3
B	424	13619	0.869480863	28	1	0.51971159	1318.256623	1163.823273	4.981709071	5	outward	0.5
B	424	14061	0.887764805	28	2	0.268624995	1034.191474	1019.721747	3.599438883	4	stay	0.3
B	424	14061	0.887764805	28	3	0.268624995	1034.191474	1019.721747	3.599438883	4	outward	0.3
B	454	4819	0.105150929	2	1	0.40137843	1227.386658	981.4099732	5.001198151	6	inward	0.4
B	454	4893	0.112532083	2	2	0.080439383	1794.221313	957.8865356	9.268624952	10	outward	0.1
B	454	5534	0.188606558	3	1	0.186209395	1143.716064	1024.86377	4.232041776	5	stay	0.2
B	454	5498	0.18395993	3	2	0.197858391	1151.586304	1012.237427	4.348545034	5	outward	0.2
B	454	5899	0.237460483	4	1	0.78685811	1744.89209	885.4590454	9.119066147	10	outward	0.8
B	454	5950	0.244195301	4	2	0.613388918	1512.581055	851.791748	7.558203078	8	stay	0.6
B	454	6047	0.257378117	4	3	0.122916574	1509.123169	846.9175721	7.556013211	8	stay	0.1
B	454	6142	0.269349444	4	4	0.117860162	1600.440552	1124.864014	7.321267425	8	outward	0.1
B	454	6488	0.313906142	5	1	0.537881883	1875.305176	778.4835815	10.47742419	11	stay	0.5
B	454	6561	0.323696186	5	2	0.153700395	1907.700317	734.9638672	10.88084778	11	stay	0.2
B	454	6546	0.321682581	5	3	0.240271326	1910.472656	734.4825439	10.90306553	11	outward	0.2
B	454	6979	0.379563962	6	1	0.477415513	1207.476685	675.9225464	6.733111526	7	stay	0.5
B	454	7041	0.387522502	6	2	0.362262941	1371.245483	838.1264648	6.672247181	7	stay	0.4
B	454	7087	0.393245504	6	3	0.208382588	1194.531494	683.916626	6.617693789	7	outward	0.2
B	454	7483	0.440657787	7	1	0.600643132	970.4420472	549.0758057	6.845914789	7	inward	0.6
B	454	7500	0.442439668	7	2	0.595862013	1044.247437	371.8102264	8.428909498	9	inward	0.6
B	454	7594	0.451985822	7	3	0.085113173	1527.928223	96.74229431	12.20555333	13	stay	0.1
B	454	7620	0.454695084	7	4	0.126011351	2037.169922	642.4404907	12.18889935	13	outward	0.1
B	454	8032	0.499333008	8	1	0.760565649	1098.036133	986.4360352	4.16328822	5	inward	0.8
B	454	8067	0.503478468	8	2	0.647384363	1752.862078	993.5333427	8.84628166	9	stay	0.6
B	454	8147	0.512819521	8	3	0.131195745	1755.119751	1007.501709	8.826749063	9	outward	0.1
B	454	8762	0.576303342	9	1	0.713058004	1497.587646	893.9724528	7.268501912	8	stay	0.7
B	454	8934	0.592523873	9	2	0.004482326	1582.294922	880.7659302	7.932079294	8	stay	0
B	454	8944	0.59349957	9	3	0	1551.343262	881.8691406	7.703914584	8	outward	0
B	454	9648	0.658951648	10	1	0.373670007	1142.664185	1119.00708	3.786735925	4	stay	0.4
B	454	9648	0.658951648	10	2	0.373670007	1142.664185	1119.00708	3.786735925	4	inward	0.4
B	454	9663	0.660295527	10	3	0.370204887	1543.263306	1048.751709	7.055859144	8	inward	0.4
B	454	9689	0.662621172	10	4	0.294374669	1874.028198	1038.067993	9.69797666	10	outward	0.3
B	454	9711	0.664589026	10	5	0.290383609	1219.798218	1126.503052	4.328903909	5	inward	0.3
B	454	9724	0.665751848	10	6	0.290383609	1021.665039	757.572876	5.371830347	6	outward	0.3
B	454	10251	0.702624192	11	1	0.619263781	1868.769043	489.5826721	11.70197466	12	outward	0.6
B	454	10315	0.706926976	11	2	0.468982908	1613.673462	1245.025879	7.249281549	8	outward	0.5
B	454	10342	0.708731636	11	3	0.572603961	1219.838989	756.9429321	6.256873866	7	inward	0.6
B	454	10421	0.713834001	11	4	0.232468968	1382.732727	628.4671021	7.94364047	8	inward	0.2
B	454	10465	0.716675033	11	5	0.427963313	1764.310791	1212.50293	8.521527586	9	inward	0.4
B	454	10493	0.718481497	11	6	0.435454655	930.0004272	225.4103546	9.395119383	10	stay	0.4
B	454	10620	0.726869212	11	7	0.007639555	1867.719971	1260.864014	9.334593714	10	outward	0
B	454	11412	0.766740381	13	1	0.80898134	925.0728149	791.6610107	4.812129777	5	inward	0.8
B	454	11434	0.767676202	13	2	0.74921169	1099.889038	642.963562	6.510513337	7	stay	0.7
B	454	11487	0.769778457	13	3	0.711376664	1085.565552	645.3728638	6.439733951	7	inward	0.7
B	454	11629	0.77639823	13	4	0.236971482	1059.69104	309.9761658	8.956574295	9	outward	0.2
B	454	11642	0.776957027	13	5	0.233023387	1081.063354	559.1826782	7.074030568	8	outward	0.2
B	454	11652	0.777387411	13	6	0.233023387	1274.70437	970.452942	5.371990521	6	inward	0.2
B	454	11685	0.778823724	13	7	0.233023387	1978.686401	1187.083984	10.31123055	11	outward	0.2
B	454	11714	0.780096024	13	8	0.222034376	1363.726318	932.305603	6.15981233	7	outward	0.2
B	454	12713	0.827136736	14	1	0.017012091	872.7108154	571.5195923	6.486590903	7	outward	0
B	454	13212	0.849540582	15	1	0.567791119	1182.178589	935.6397705	4.95733088	5	inward	0.6
B	454	13265	0.85213158	15	2	0.566396973	1189.141602	231.4337006	9.927602101	10	outward	0.6
B	454	13353	0.856495725	16	1	0.452818819	851.6536458	883.097758	3.917578314	4	stay	0.5
B	454	13399	0.858692252	16	2	0.361069273	1069.80603	1024.340454	3.775682058	4	stay	0.4
B	454	13407	0.859074257	16	3	0.357042225	1085.453247	1067.594482	3.633604183	4	outward	0.4
B	454	13657	0.871281603	17	1	0.988044922	939.1390381	638.7261963	6.06020322	7	inward	1
B	454	13677	0.872247842	17	2	0.980040357	1292.022217	668.4645996	7.203563688	8	inward	1
B	454	13950	0.883119913	17	3	0.481449243	1783.547852	993.8297119	9.086222411	10	stay	0.5
B	454	13975	0.884191202	17	4	0.482535322	1778.255432	809.3120728	9.644316684	10	inward	0.5
B	454	14064	0.88789094	17	5	0.745681159	1927.183105	675.2045898	11.25954185	12	outward	0.7
B	454	14112	0.890167854	17	6	0.749426398	1928.525146	1047.087158	10.11639991	11	stay	0.7
B	454	14114	0.890265026	17	7	0.749426398	1930.837402	1045.210205	10.13878045	11	outward	0.7
B	454	14134	0.89123617	17	8	0.749426398	1695.164795	935.8320008	8.572874921	9	outward	0.7
B	454	14243	0.896366904	17	9	0.51995701	1287.441284	979.7962646	5.415181614	6	inward	0.5
C	302	2056	0	2	1	1	1890	1750	7.115777677	8	outward	1
C	302	2154	0	3	1	0.365517241	886	2480	11.5684959	12	outward	0.4
C	302	2176	0.029514955	3	2	0.255517241	750	2050	10.86045536	11	outward	0.3
C	302	2382	0.110494315	4	1	0.579310345	905	2740	12.23694041	13	outward	0.6
C	302	2442	0.144267229	4	2	0.565517241	2413.333333	1043.333333	3.872293708	4	outward	0.6
C	302	2534	0.191037093	5	1	0.644827586	1977.5	1290	5.614007297	6	inward	0.6
C	302	2618	0.231901452	5	2	0.686206897	1320	1180	7.306661541	8	inward	0.7
C	302	2642	0.241923706	5	3	0.513793103	1100	2030	9.837298123	10	inward	0.5
C	302	2678	0.256417864	5	4	0.582758621	1620	2710	10.6315846	11	outward	0.6
C	302	2698	0.263892148	5	5	0.589655172	1810	1350	6.211323472	7	outward	0.6
C	302	2818	0.313688892	6	1	0.234827586	2390	1220	4.456753545	5	inward	0.2
C	302	3024	0.396130646	8	1	0.713793103	1270	2477.142857	10.63550783	11	stay	0.7
C	302	3024	0.396130646	8	2	0.713793103	1270	2477.142857	10.63550783	11	inward	0.7
C	302	3124	0.430360746	8	3	0.655172414	1280	2910	11.91461137	12	outward	0.7
C	302	3158	0.43968181	8	4	0.651724138	1500	1570	7.603580637	8	outward	0.7
C	302	3320	0.490492756	9	1	0.855172414	1980	1815	7.121192813	8	inward	0.9
C	302	3348	0.499589297	9	2	0.855172414	1840	2190	8.56644135	9	inward	0.9
C	302	3390	0.512598432	9	3	0.751724138	1220	2000	9.441566362	10	inward	0.8
C	302	3430	0.524469143	9	4	0.831034483	1450	2760	11.11095117	12	stay	0.8
C	302	3486	0.538343259	9	5	0.779310345	1430	2830	11.36932442	12	stay	0.8
C	302	3494	0.540245867	9	6	0.762068966	1450	2870	11.45726732	12	outward	0.8
C	302	3560	0.554829501	9	7	0.568965517	1750	1050	5.701897968	6	outward	0.6
C	302	3736	0.594248047	10	1	0.693103448	1270	2830	11.68911175	12	outward	0.7
C	302	3774	0.602432315	10	2	0.696551724	2160	2880	10.3954337	11	outward	0.7
C	302	4164	0.671467712	11	1	0.420689655	2250	1400	5.295044412	6	inward	0.4
C	302	4206	0.678094047	11	2	0.486206897	1710	1700	7.392977646	8	inward	0.5
C	302	4248	0.684371296	11	3	0.493103448	1056.666667	2306.666667	10.67142416	11	inward	0.5
C	302	4278	0.688738621	11	4	0.493103448	428	2420	12.6454303	13	outward	0.5
C	302	4292	0.690738856	11	5	0.493103448	1205	1515	8.329846984	9	outward	0.5
C	302	4584	0.722674455	11	6	0.506896552	1390	1350	7.421564715	8	outward	0.5
C	302	4668	0.730669554	11	7	0.54137931	1550	1290	6.812191227	7	inward	0.5
C	302	4824	0.742905749	13	1	0.582758621	1680	2030	8.406765986	9	inward	0.6
C	302	4872	0.745942846	13	2	0.593103448	1430	2510	10.3820722	11	outward	0.6
C	302	4924	0.748704602	13	3	0.506896552	1900	2240	8.614174676	9	outward	0.5
C	302	4952	0.74997834	13	4	0.451724138	2170	2080	7.633917564	8	outward	0.5
C	302	5266	0.765894933	13	5	0.824137931	2730	1160	3.711841163	4	stay	0.8
C	302	5324	0.769219381	13	6	0.831034483	2722.5	1152.5	3.694343384	4	inward	0.8
C	302	5538	0.781004401	13	7	0.772413793	2220	1680	6.23522253	7	inward	0.8
C	302	5600	0.783507785	13	8	0.682758621	1930	2310	8.7879307	9	stay	0.7
C	302	5632	0.78442577	13	9	0.672413793	1880	2200	8.522756774	9	stay	0.7
C	302	5668	0.785385246	13	10	0.713793103	1700	2150	8.723299072	9	outward	0.7
C	302	5682	0.785832658	13	11	0.720689655	1820	1670	7.044124164	8	outward	0.7
C	302	5842	0.788853953	14	1	0.789655172	1990	1920	7.428099344	8	stay	0.8
C	302	5842	0.788853953	14	2	0.789655172	1990	1920	7.428099344	8	inward	0.8
C	302	5886	0.790018666	14	3	0.772413793	1560	2300	9.472646333	10	outward	0.8
C	302	5942	0.791849432	14	4	0.768965517	1560	2140	8.997396648	9	outward	0.8
C	302	6038	0.796603924	14	5	0.779310345	1380	1300	7.348847183	8	inward	0.8
C	302	6146	0.804265454	14	6	0.762068966	2030	2200	8.257955345	9	inward	0.8
C	302	6188	0.807459374	14	7	0.782758621	1430	3040	12.03612083	13	outward	0.8
C	302	6460	0.826515492	14	8	0.717241379	1230	2560	10.96745954	11	outward	0.7
C	302	6892	0.842167274	15	1	0.631034483	279	2560	13.39862613	14	outward	0.6
C	302	7042	0.850777672	16	1	0.644827586	2470	448	2.299735938	3	inward	0.6
C	302	7104	0.854069857	16	2	0.64137931	1510	959	6.305644032	7	inward	0.6
C	302	7576	0.863108127	16	3	0.603448276	947	2770	12.22313812	13	stay	0.6
C	302	7826	0.866625744	16	4	0.665517241	943	2770	12.23247857	13	outward	0.7
C	302	7886	0.867999625	16	5	0.64137931	1360	2410	10.23662592	11	outward	0.6
C	302	9008	0.883890608	17	1	0.703448276	1370	2170	9.524062454	10	stay	0.7
C	302	9068	0.884969965	17	2	0.703448276	1470	2210	9.404862371	10	outward	0.7
C	302	9086	0.88526322	17	3	0.703448276	1390	1750	8.350559428	9	inward	0.7
C	302	9322	0.887197262	19	1	0.55862069	1090	1990	9.764055713	10	stay	0.6
C	302	9384	0.887684232	19	2	0.672413793	1120	2010	9.733021423	10	stay	0.7
C	302	9704	0.893916558	19	3	0.962068966	722	1340	9.534079592	10	outward	1
C	302	9788	0.895405913	19	4	0.965517241	2310	664	3.194471496	4	inward	1
C	302	9860	0.897382346	19	5	0.893103448	1340	1810	8.636497405	9	outward	0.9
C	365	2422	0.134200908	2	1	0.816901408	1057.692308	1528.461538	8.805361827	9	stay	0.8
C	365	2442	0.144267229	2	2	0.795774648	1299.166667	1907.5	8.994183977	9	stay	0.8
C	365	2482	0.163102473	2	3	0.577464789	1681.363636	2210.909091	8.947519288	9	stay	0.6
C	365	2490	0.166706062	2	4	0.514084507	1737.727273	2221.818182	8.866192014	9	stay	0.5
C	365	2516	0.181037215	2	5	0.408450704	2070.588235	2428.823529	8.957578489	9	inward	0.4
C	365	2554	0.201938704	2	6	0.166549296	2010	2450	9.120342652	10	stay	0.2
C	365	2534	0.191037093	2	7	0.293661972	2007.058824	2465.882353	9.178107635	10	outward	0.3
C	365	2566	0.207949667	2	8	0.090492958	2010	2390	8.919776629	9	outward	0.1
C	365	2784	0.299896375	3	1	0.820422535	1207.111111	2612.222222	11.17171193	12	outward	0.8
C	365	2796	0.304730585	3	2	0.915492958	1880	2630	9.925198432	10	inward	0.9
C	365	2818	0.313688892	3	3	0.936619718	1853.333333	2693.333333	10.17837659	11	stay	0.9
C	365	2850	0.326581139	3	4	0.85915493	1242.5	2342.5	10.3135518	11	inward	0.9
C	365	2866	0.33297359	3	5	0.820422535	780.5	2740	12.53789762	13	outward	0.8
C	365	2934	0.360262607	3	6	0.866197183	1483.2	2928	11.58006238	12	outward	0.9
C	365	2960	0.370622983	3	7	0.86971831	1800	1800	7.4637431	8	outward	0.9
C	365	3024	0.396130646	4	1	0.816901408	1290	2210	9.828530834	10	outward	0.8
C	365	3060	0.409294476	4	2	0.852112676	1814.285714	1865.714286	7.624941107	8	outward	0.9
C	365	3090	0.419687674	4	3	0.76056338	2130	1780	6.719985828	7	outward	0.8
C	365	3112	0.42661171	4	4	0.781690141	2180	1400	5.442051001	6	outward	0.8
C	365	3278	0.476612476	5	1	0.771126761	888.6666667	2756.666667	12.32277677	13	outward	0.8
C	365	3286	0.479275963	5	2	0.767605634	915	2570	11.73982049	12	outward	0.8
C	365	3300	0.483949421	5	3	0.707746479	1340	2420	10.31076687	11	inward	0.7
C	365	3320	0.490492756	5	4	0.834507042	1425	2795	11.26929367	12	outward	0.8
C	365	3376	0.508382935	5	5	0.873239437	1837.5	2900	10.89479788	11	inward	0.9
C	365	3514	0.544759881	5	6	0.73943662	388.3	2008	11.84137656	12	outward	0.7
C	365	3536	0.549535388	5	7	0.728873239	1580	1550	7.335059038	8	outward	0.7
C	365	3622	0.569227785	5	8	0.573943662	2051.052632	1082.105263	4.888799011	5	stay	0.6
C	365	3650	0.575356688	5	9	0.556338028	2177.5	1000.625	4.341150814	5	outward	0.6
C	365	4016	0.644634925	6	1	0.577464789	1812.857143	1367.142857	6.246870791	7	inward	0.6
C	365	4038	0.648469194	6	2	0.559859155	1680	1800	7.74366477	8	inward	0.6
C	365	4080	0.656297126	6	3	0.556338028	1330	2030	9.237299855	10	inward	0.6
C	365	4194	0.676231315	6	4	0.447183099	1140	2210	10.20117493	11	outward	0.4
C	365	4260	0.686118406	6	5	0.468309859	2690	1333.636364	4.366792487	5	outward	0.5
C	365	4626	0.726749921	7	1	0.559859155	2385	1978	6.980583534	7	stay	0.6
C	365	4708	0.734131274	7	2	0.387323944	2292.368421	1783.684211	6.452775876	7	outward	0.4
C	365	4758	0.73840669	7	3	0.376760563	2653.75	927.5	3.0321409	4	outward	0.4
C	365	4880	0.746406724	8	1	0.429577465	868.8235294	2577.647059	11.87519374	12	outward	0.4
C	365	5104	0.758060917	9	1	0.700704225	2240.769231	1720	6.328258656	7	stay	0.7
C	365	5112	0.758355556	9	2	0.735915493	2256.153846	1760	6.433193843	7	inward	0.7
C	365	5156	0.760440881	9	3	0.76056338	2280	2090	7.505873174	8	inward	0.8
C	365	5186	0.761908635	9	4	0.76056338	1976	2524	9.420727186	10	outward	0.8
C	365	5390	0.77284456	9	5	0.735915493	2061.509434	1781.886792	6.85607785	7	stay	0.7
C	365	5438	0.775832451	9	6	0.711267606	2143.018868	1763.773585	6.644131982	7	outward	0.7
C	365	5848	0.788981086	10	1	0.588028169	2222.222222	2085.555556	7.57339722	8	stay	0.6
C	365	5842	0.788853953	10	2	0.60915493	2223.888889	2082.222222	7.55966946	8	stay	0.6
C	365	5884	0.789954735	10	3	0.605633803	2130	2090	7.730542343	8	stay	0.6
C	365	6134	0.803378099	10	4	0.633802817	2200.285714	2049.142857	7.483769778	8	stay	0.6
C	365	6170	0.80603633	10	5	0.637323944	2159.142857	1992.571429	7.360501526	8	stay	0.6
C	365	6278	0.814550838	10	6	0.626760563	2224.166667	2054.166667	7.464524105	8	stay	0.6
C	365	6428	0.825197576	10	7	0.64084507	2103.684211	1925.789474	7.236286011	8	stay	0.6
C	365	6436	0.825583189	10	8	0.644366197	2110	1930	7.238809517	8	stay	0.6
C	365	6512	0.828629936	10	9	0.623239437	1782	1872	7.7148388	8	outward	0.6
C	365	7118	0.854811151	11	1	0.51056338	1538.947368	1951.578947	8.506773357	9	outward	0.5
C	365	7192	0.858304697	11	2	0.570422535	1695.555556	1874.444444	7.918281731	8	inward	0.6
C	365	7324	0.860883841	11	3	0.542253521	997.7692308	1926.153846	9.864478066	10	outward	0.5
C	365	8844	0.880665645	13	1	0.39084507	2872.5	1162.125	3.590696287	4	outward	0.4
C	365	8960	0.88288219	14	1	0.397887324	1194.166667	1573.333333	8.488667821	9	outward	0.4
C	365	9788	0.895405913	15	1	0.397887324	2306.666667	1020	4.05627935	5	outward	0.4
C	95	2326	0.067916436	2	1	0.678456592	1910	1180	5.518227444	6	outward	0.7
C	95	2364	0.096716926	2	2	0.553054662	2820	1530	4.960761258	5	outward	0.6
C	95	2490	0.166706062	3	1	0.948553055	1130	1510	8.546181264	9	outward	0.9
C	95	2526	0.186538482	3	2	0.958199357	2340	1400	5.118985333	6	outward	1
C	95	2544	0.196688931	3	3	0.958199357	2560	1250	4.251332484	5	stay	1
C	95	2546	0.197767933	3	4	0.958199357	2550	1260	4.300329538	5	inward	1
C	95	2562	0.205945514	3	5	0.906752412	2470	1770	6.152271221	7	stay	0.9
C	95	2580	0.214667116	3	6	0.855305466	2410	1870	6.575239628	7	outward	0.9
C	95	2662	0.249891073	4	1	0.826366559	818	965	8.67634424	9	inward	0.8
C	95	2698	0.263892148	4	2	0.733118971	995	2710	11.93973479	12	stay	0.7
C	95	2714	0.271186785	4	3	0.729903537	1800	2920	11.01904188	12	outward	0.7
C	95	2728	0.277239745	4	4	0.733118971	2200	2660	9.579295361	10	outward	0.7
C	95	2756	0.288477571	4	5	0.733118971	2480	904	3.315552354	4	outward	0.7
C	95	2822	0.315317675	5	1	0.938906752	1730	1640	7.17927595	8	inward	0.9
C	95	2904	0.348195265	5	2	0.617363344	2050	2880	10.52970428	11	inward	0.6
C	95	2918	0.353795535	5	3	0.636655949	1845	3085	11.51040458	12	stay	0.6
C	95	2968	0.373915948	5	4	0.607717042	1400	3010	11.99561325	12	inward	0.6
C	95	3024	0.396130646	5	5	0.376205788	556	2520	12.53738095	13	outward	0.4
C	95	3038	0.401253245	5	6	0.366559486	1168	1330	8.069779106	9	outward	0.4
C	95	3186	0.446695459	6	1	0.77170418	965	2460	11.31562945	12	inward	0.8
C	95	3194	0.448650898	6	2	0.790996785	1250	3000	12.25346845	13	stay	0.8
C	95	3252	0.468080788	6	3	0.63022508	601	2540	12.46728893	13	outward	0.6
C	95	3266	0.472674774	6	4	0.668810289	679	2410	11.92885449	12	outward	0.7
C	95	3312	0.4878816	6	5	0.678456592	1810	2100	8.344151526	9	stay	0.7
C	95	3320	0.490492756	6	6	0.678456592	1725	2055	8.383451637	9	outward	0.7
C	95	3352	0.500888803	6	7	0.61414791	2440	1690	5.916816034	6	inward	0.6
C	95	3372	0.507138503	6	8	0.636655949	2030	1650	6.514200148	7	outward	0.6
C	95	3548	0.552182444	7	1	0.758842444	2130	1570	6.062302488	7	outward	0.8
C	95	3562	0.555270677	7	2	0.784565916	2140	1550	5.980484979	6	stay	0.8
C	95	3588	0.561250156	7	3	0.742765273	2440	1710	5.985228088	6	outward	0.7
C	95	3614	0.56735858	7	4	0.77170418	2510	1380	4.764093173	5	outward	0.8
C	95	3648	0.57492118	7	5	0.797427653	2110	518	3.633657807	4	inward	0.8
C	95	3680	0.581954747	7	6	0.800643087	1500	1910	8.486851061	9	inward	0.8
C	95	3700	0.586294815	7	7	0.752411576	1680	2390	9.503998648	10	stay	0.8
C	95	3722	0.591124463	7	8	0.819935691	1880	2510	9.528027086	10	stay	0.8
C	95	3738	0.594684864	7	9	0.836012862	2227.5	2787.5	9.994220354	10	stay	0.8
C	95	3804	0.608479925	7	10	0.807073955	2140	2530	9.204930706	10	outward	0.8
C	95	3814	0.610518891	7	11	0.803858521	2110	2320	8.531605474	9	outward	0.8
C	95	3836	0.615004615	7	12	0.768488746	2010	2050	7.804448452	8	inward	0.8
C	95	3850	0.617561491	7	13	0.768488746	1890	2250	8.664409341	9	outward	0.8
C	95	3882	0.622307424	7	14	0.739549839	2310	2000	7.156673912	8	inward	0.7
C	95	4028	0.646642383	7	15	0.736334405	965	2180	10.57923791	11	outward	0.7
C	95	4050	0.650679769	7	16	0.736334405	2610	438	1.817950873	2	outward	0.7
C	95	4248	0.684371296	8	1	0.836012862	2290	1520	5.594389356	6	inward	0.8
C	95	4318	0.694451755	8	2	0.745980707	2310	1690	6.113434917	7	stay	0.7
C	95	4334	0.696879675	8	3	0.778135048	2452.5	1905	6.642968298	7	inward	0.8
C	95	4370	0.702617629	8	4	0.813504823	2520	2070	7.149371045	8	stay	0.8
C	95	4584	0.722674455	8	5	0.723472669	1740	1680	7.264354874	8	outward	0.7
C	95	4668	0.730669554	8	6	0.765273312	1810	1590	6.844663945	7	inward	0.8
C	95	5084	0.757069486	8	7	0.681672026	1440	1746.666667	8.208280903	9	outward	0.7
C	95	5180	0.761624637	8	8	0.556270096	2760	1370	4.426940227	5	stay	0.6
C	95	5214	0.763122517	8	9	0.604501608	2900	1340	4.224223677	5	inward	0.6
C	95	5254	0.765204786	8	10	0.610932476	1960	1950	7.580385581	8	inward	0.6
C	95	5340	0.770103343	8	11	0.652733119	1650	2010	8.414913376	9	inward	0.7
C	95	5418	0.774566978	8	12	0.639871383	1100	1850	9.39514447	10	stay	0.6
C	95	5440	0.77595615	8	13	0.68488746	1270	1890	9.02686764	10	stay	0.7
C	95	5458	0.776903677	8	14	0.726688103	1360	1980	9.027207091	10	outward	0.7
C	95	5828	0.788555102	9	1	0.807073955	2580	653	2.381204958	3	outward	0.8
C	95	5914	0.790901564	10	1	0.78778135	2840	1640	5.350419459	6	stay	0.8
C	95	5988	0.793679707	10	2	0.678456592	2880	1650	5.368354071	6	outward	0.7
C	95	6034	0.796370541	11	1	0.707395498	2910	1760	5.761177117	6	outward	0.7
C	95	6236	0.811223986	12	1	0.816720257	1570	2410	9.786089274	10	outward	0.8
C	95	6278	0.814550838	12	2	0.839228296	1900	2250	8.646353317	9	outward	0.8
C	95	6436	0.825583189	12	3	0.839228296	1925	2035	7.915051598	8	inward	0.8
C	95	6586	0.83120385	12	4	0.562700965	2170	2360	8.581258128	9	outward	0.6
C	95	6868	0.840869638	13	1	0.8585209	1970	618	4.24475419	5	outward	0.9
C	95	6918	0.843746523	13	2	0.816720257	2775	1105	3.468626702	4	inward	0.8
C	95	6936	0.844852783	13	3	0.829581994	2850	1590	5.16265093	6	stay	0.8
C	95	6944	0.845346097	13	4	0.836012862	2790	1600	5.234185593	6	stay	0.8
C	95	6950	0.845716082	13	5	0.836012862	2780	1620	5.31341232	6	inward	0.8
C	95	7020	0.849621142	13	6	0.848874598	2360	2130	7.539067104	8	outward	0.8
C	95	7118	0.854811151	13	7	0.900321543	1890	1630	6.766201674	7	inward	0.9
C	95	7412	0.861975261	13	8	0.874598071	1640	2245	9.137416369	10	outward	0.9
C	95	7470	0.862331822	13	9	0.78778135	1660	1590	7.224329474	8	inward	0.8
C	95	7520	0.862675354	13	10	0.77170418	1300	1960	9.128368571	10	inward	0.8
C	95	7576	0.863108127	13	11	0.816720257	1180	2360	10.51229226	11	outward	0.8
C	95	7706	0.864738059	13	12	0.803858521	1330	2220	9.760137769	10	stay	0.8
C	95	7748	0.865386753	13	13	0.819935691	1690	2480	9.768335127	10	inward	0.8
C	95	7824	0.86658337	13	14	0.803858521	1590	2560	10.21185002	11	inward	0.8
C	95	7910	0.868547085	13	15	0.826366559	1530	2850	11.24461222	12	stay	0.8
C	95	8280	0.873594889	13	16	0.829581994	1360	2960	11.91308665	12	stay	0.8
C	95	8296	0.873676739	13	17	0.848874598	1520	3070	11.97305509	12	stay	0.8
C	95	8392	0.873972422	13	18	0.864951768	1620	3020	11.63952449	12	stay	0.9
C	95	8434	0.874135883	13	19	0.855305466	1610	3050	11.75493259	12	outward	0.9
C	95	8588	0.876066458	14	1	0.794212219	2080	1250	5.24651147	6	stay	0.8
C	95	8552	0.875502951	14	2	0.826366559	2080	1250	5.24651147	6	inward	0.8
C	95	8626	0.876517574	14	3	0.807073955	2160	1630	6.188486633	7	outward	0.8
C	95	8730	0.878249578	14	4	0.77170418	2480	1610	5.58795946	6	outward	0.8
C	95	8784	0.879373644	14	5	0.797427653	2310	1200	4.563453844	5	inward	0.8
C	95	9084	0.885230637	14	6	0.826366559	2380	1570	5.602355874	6	inward	0.8
C	95	9368	0.887550219	14	7	0.70096463	2180	1640	6.18153165	7	outward	0.7
C	95	9948	0.89976427	15	1	0.971061093	2070	1780	6.833659231	7	inward	1
C	291	2416	0.131031513	2	1	0.59798995	1920	1450	6.189300288	7	stay	0.6
C	291	2422	0.134200908	2	2	0.560301508	1910	1480	6.296355176	7	stay	0.6
C	291	2464	0.154637666	2	3	0.376884422	2030	1520	6.12772577	7	outward	0.4
C	291	2626	0.235256518	3	1	0.811557789	1380	1950	8.896175423	9	outward	0.8
C	291	2636	0.23944249	3	2	0.846733668	1910	1650	6.777954664	7	outward	0.8
C	291	2650	0.245187912	3	3	0.796482412	2190	1070	4.485838211	5	inward	0.8
C	291	2662	0.249891073	3	4	0.77638191	740	2070	10.93549902	11	outward	0.8
C	291	2678	0.256417864	3	5	0.766331658	2090	1100	4.827115352	5	stay	0.8
C	291	2698	0.263892148	3	6	0.761306533	2180	1110	4.617460416	5	inward	0.8
C	291	2716	0.272063332	3	7	0.736180905	2150	2350	8.575170491	9	stay	0.7
C	291	2754	0.287655402	3	8	0.585427136	1990	2260	8.522144299	9	inward	0.6
C	291	2778	0.297492305	3	9	0.467336683	1020	1880	9.692418972	10	inward	0.5
C	291	2840	0.322585858	3	10	0.172361809	832	2480	11.70641788	12	stay	0.2
C	291	2842	0.323384914	3	11	0.162060302	828	2480	11.71670444	12	outward	0.2
C	291	3026	0.396862446	4	1	0.791457286	1880	1980	7.832370206	8	inward	0.8
C	291	3110	0.425977465	4	2	0.731155779	843	2810	12.58175514	13	outward	0.7
C	291	3168	0.442251376	4	3	0.525125628	897	1890	10.06873247	11	outward	0.5
C	291	3244	0.465403457	4	4	0.203517588	1420	1610	7.922792493	8	stay	0.2
C	291	3244	0.465403457	4	5	0.203517588	1420	1610	7.922792493	8	inward	0.2
C	291	3270	0.473987341	4	6	0.283919598	1606.666667	2093.333333	8.756126527	9	outward	0.3
C	291	3494	0.540245867	5	1	0.889447236	1350	2590	10.79326419	11	stay	0.9
C	291	3518	0.545614183	5	2	0.849246231	1540	2510	10.1549012	11	inward	0.8
C	291	3558	0.554388325	5	3	0.778894472	1250	2600	11.04037527	12	outward	0.8
C	291	3608	0.565956676	5	4	0.766331658	919	1980	10.21471887	11	stay	0.8
C	291	3602	0.564528319	5	5	0.766331658	924	2010	10.27199745	11	outward	0.8
C	291	3794	0.606440959	6	1	0.319095477	1640	1730	7.648314782	8	stay	0.3
C	291	3792	0.606033166	6	2	0.329145729	1630	1730	7.673332428	8	stay	0.3
C	291	3818	0.611334477	6	3	0.309045226	1820	1900	7.714625954	8	inward	0.3
C	291	3828	0.613373443	6	4	0.309045226	554	1350	10.10972431	11	outward	0.3
C	291	3988	0.639937822	7	1	0.670854271	1440	2640	10.75813628	11	outward	0.7
C	291	4020	0.645304078	7	2	0.675879397	1210	1840	9.064712175	10	inward	0.7
C	291	4040	0.648837623	7	3	0.67839196	2460	3080	10.8251681	11	stay	0.7
C	291	4062	0.652905279	7	4	0.680904523	2150	3000	10.82780121	11	stay	0.7
C	291	4092	0.65849269	7	5	0.680904523	2176.666667	2973.333333	10.70435402	11	inward	0.7
C	291	4110	0.661839091	7	6	0.680904523	1740	2950	11.2128618	12	outward	0.7
C	291	4302	0.692146851	8	1	0.771356784	1360	2310	9.945922945	10	inward	0.8
C	291	4312	0.693587416	8	2	0.766331658	1393.333333	2583.333333	10.68132809	11	outward	0.8
C	291	4498	0.71514313	9	1	0.577889447	972	2670	11.88026053	12	stay	0.6
C	291	4504	0.71564432	9	2	0.570351759	1050	2730	11.8702036	12	stay	0.6
C	291	4534	0.718274072	9	3	0.66080402	1020	2700	11.85291227	12	outward	0.7
C	291	4658	0.729738531	9	4	0.592964824	1600	1680	7.616027885	8	inward	0.6
C	291	4678	0.731534984	9	5	0.587939698	1090	1750	9.189976342	10	outward	0.6
C	291	4900	0.747566418	10	1	0.889447236	975	2000	10.10532663	11	outward	0.9
C	291	4994	0.752077518	10	2	0.763819095	2570	785	2.765519232	3	inward	0.8
C	291	5008	0.752821449	10	3	0.773869347	2610	918	3.081926511	4	inward	0.8
C	291	5036	0.754400172	10	4	0.708542714	2840	1380	4.402957801	5	stay	0.7
C	291	5056	0.755517151	10	5	0.824120603	2781.666667	1458.333333	4.727171244	5	stay	0.8
C	291	5112	0.758355556	10	6	0.814070352	2742.777778	1403.888889	4.563527412	5	outward	0.8
C	291	5266	0.765894933	11	1	0.640703518	2480	774	2.957364882	3	outward	0.6
C	291	5400	0.773459709	12	1	0.653266332	876	1940	10.24403066	11	stay	0.7
C	291	5440	0.77595615	12	2	0.680904523	886	2110	10.6196114	11	stay	0.7
C	291	5452	0.776587835	12	3	0.708542714	1100	2160	10.17164139	11	outward	0.7
C	291	5668	0.785385246	13	1	0.695979899	1610	1740	7.750578192	8	outward	0.7
C	291	5710	0.786421321	13	2	0.613065327	2470	1500	5.228355922	6	outward	0.6
C	291	5732	0.786801304	13	3	0.638190955	2630	339	1.605264809	2	inward	0.6
C	291	5830	0.788599685	13	4	0.41959799	995	1770	9.511868752	10	outward	0.4
C	291	6038	0.796603924	14	1	0.967336683	1810	1140	5.712352701	6	inward	1
C	291	6134	0.803378099	14	2	0.964824121	2300	1670	6.063969567	7	inward	1
C	291	6158	0.80513824	14	3	0.962311558	988	1830	9.668119291	10	stay	1
C	291	6236	0.811223986	14	4	0.849246231	1185	1815	9.073057093	10	outward	0.8
C	291	6272	0.81407184	14	5	0.891959799	1170	1750	8.960460802	9	outward	0.9
C	291	6486	0.827571487	15	1	0.826633166	1950	949.3333333	4.8821593	5	stay	0.8
C	291	6534	0.829406308	15	2	0.791457286	2680	1430	4.717555914	5	inward	0.8
C	291	6628	0.832182948	15	3	0.771356784	2700	1620	5.375259174	6	stay	0.8
C	291	6614	0.831874238	15	4	0.773869347	2700	1610	5.339421194	6	inward	0.8
C	291	6728	0.835481069	15	5	0.783919598	1830	1550	6.685543407	7	outward	0.8
C	291	7042	0.850777672	17	1	0.773869347	2190	732	3.702786342	4	outward	0.8
C	291	7188	0.858197037	18	1	0.788944724	2105	1420	5.666698053	6	inward	0.8
C	291	7282	0.860354218	18	2	0.783919598	1850	1750	7.204981399	8	stay	0.8
C	291	7298	0.86071287	18	3	0.783919598	1965	1990	7.696590821	8	outward	0.8
C	291	7480	0.862366261	18	4	0.695979899	2237.333333	1842	6.734824839	7	outward	0.7
C	291	7822	0.866540996	19	1	0.90201005	2042.5	932.75	4.567980431	5	inward	0.9
C	291	7840	0.866930723	19	2	0.834170854	1890	1140	5.480192161	6	stay	0.8
C	291	7852	0.867210054	19	3	0.851758794	1990	1430	5.963307054	6	inward	0.9
C	291	7898	0.868273355	19	4	0.992462312	1920	2060	8.003423002	9	inward	1
C	291	7922	0.868820815	19	5	0.866834171	1510	2150	9.139691877	10	stay	0.9
C	291	7936	0.869111068	19	6	0.846733668	1400	2120	9.311965551	10	stay	0.8
C	291	7952	0.869437243	19	7	0.859296482	1480	2140	9.179868078	10	outward	0.9
C	291	7996	0.870409213	19	8	0.804020101	2570	743	2.64724297	3	inward	0.8
C	291	8034	0.871165878	19	9	0.859296482	2480	1490	5.179732131	6	outward	0.9
C	291	8280	0.873594889	20	1	0.751256281	967	2700	11.97698764	12	inward	0.8
C	291	8392	0.873972422	20	2	0.826633166	1190	2890	12.03827454	13	stay	0.8
C	291	8400	0.87398721	20	3	0.829145729	1190	2890	12.03827454	13	stay	0.8
C	291	8434	0.874135883	20	4	0.819095477	1160	2930	12.22256049	13	outward	0.8
C	291	8520	0.875151976	20	5	0.816582915	1270	2860	11.78097569	12	outward	0.8
C	291	8560	0.875594778	20	6	0.846733668	1470	2720	10.94673105	11	inward	0.8
C	291	8648	0.876841041	20	7	0.824120603	1560	2890	11.31900397	12	inward	0.8
C	291	8796	0.879640379	20	8	0.806532663	1190	2920	12.1295131	13	stay	0.8
C	291	8824	0.880232346	20	9	0.814070352	1190	2920	12.1295131	13	outward	0.8
C	291	8848	0.880753202	20	10	0.793969849	1130	2830	11.98577619	12	inward	0.8
C	291	8948	0.882661813	20	11	0.82160804	1030	2830	12.20664344	13	outward	0.8
C	291	9074	0.885067717	20	12	0.748743719	745	2290	11.44998638	12	outward	0.7
C	291	9086	0.88526322	20	13	0.743718593	1040	1760	9.357874617	10	outward	0.7
C	291	9704	0.893916558	21	1	0.650753769	741	1650	10.02969566	11	outward	0.7
C	291	9906	0.898722275	21	2	0.640703518	1090	1410	8.468986269	9	outward	0.6
