# Supplementary material for: Emergent regulation of ant foraging frequency through a computationally inexpensive forager movement rule
Source: eLife. 2023 Apr 17;12:e77659. doi: 10.7554/eLife.77659 (PMC10110237; doi:10.7554/eLife.77659)
Supplement: Figure 4—source data 1. — Output data from 200 runs of the 1D agent-based model. The file contains 3 spreadsheets: (1) Forager data. Includes data on the forager’s crop load and position in the nest at every step of the simulation. (2) Trophallaxis data. Includes data on the forager’s and the receiver’s crop loads, and the amount of food transferred at every interaction. (3) Trip data. Aggregated data on each trip of the forager inside the nest, including trip length and forager’s crop load upon exiting. [file elife-77659-fig4-data1.xlsx]

## Sheet: Forager_data_1D
step	colony state	empty colony state	repeat	crop	trip	position
0	0	1	1	1	0	0
1	0.00487206	0.995128	1	0.780758	1	1
2	0.00487206	0.995128	1	0.780758	1	0
3	0.00954675	0.990453	1	0.789639	2	1
4	0.0164493	0.983551	1	0.479026	2	2
5	0.0270943	0.972906	1	0	2	3
6	0.0270943	0.972906	1	0	2	4
7	0.0270943	0.972906	1	0	2	5
8	0.0270943	0.972906	1	0	2	5
9	0.0270943	0.972906	1	0	2	4
10	0.0270943	0.972906	1	0	2	3
11	0.0270943	0.972906	1	0	2	2
12	0.0270943	0.972906	1	0	2	3
13	0.0270943	0.972906	1	0	2	3
14	0.0270943	0.972906	1	0	2	2
15	0.0270943	0.972906	1	0	2	2
16	0.0270943	0.972906	1	0	2	3
17	0.0270943	0.972906	1	0	2	2
18	0.0270943	0.972906	1	0	2	2
19	0.0270943	0.972906	1	0	2	3
20	0.0270943	0.972906	1	0	2	2
21	0.0270943	0.972906	1	0	2	1
22	0.0270943	0.972906	1	0	2	0
23	0.0295659	0.970434	1	0.888776	3	1
24	0.0300289	0.969971	1	0.867941	3	1
25	0.0493165	0.950684	1	0	3	2
26	0.0493165	0.950684	1	0	3	2
27	0.0493165	0.950684	1	0	3	2
28	0.0493165	0.950684	1	0	3	1
29	0.0493165	0.950684	1	0	3	0
30	0.051918	0.948082	1	0.882932	4	1
31	0.0527726	0.947227	1	0.844476	4	2
32	0.056636	0.943364	1	0.670622	4	3
33	0.0650017	0.934998	1	0.294165	4	4
34	0.0690608	0.930939	1	0.111506	4	3
35	0.0715387	0.928461	1	0	4	2
36	0.0715387	0.928461	1	0	4	1
37	0.0715387	0.928461	1	0	4	0
38	0.073317	0.926683	1	0.919976	5	1
39	0.0814066	0.918593	1	0.555947	5	2
40	0.0850385	0.914961	1	0.392508	5	1
41	0.0874126	0.912587	1	0.285675	5	2
42	0.0874917	0.912508	1	0.282118	5	1
43	0.0937609	0.906239	1	0	5	2
44	0.0937609	0.906239	1	0	5	3
45	0.0937609	0.906239	1	0	5	3
46	0.0937609	0.906239	1	0	5	4
47	0.0937609	0.906239	1	0	5	3
48	0.0937609	0.906239	1	0	5	2
49	0.0937609	0.906239	1	0	5	2
50	0.0937609	0.906239	1	0	5	2
51	0.0937609	0.906239	1	0	5	1
52	0.0937609	0.906239	1	0	5	1
53	0.0937609	0.906239	1	0	5	2
54	0.0937609	0.906239	1	0	5	1
55	0.0937609	0.906239	1	0	5	1
56	0.0937609	0.906239	1	0	5	1
57	0.0937609	0.906239	1	0	5	2
58	0.0937609	0.906239	1	0	5	1
59	0.0937609	0.906239	1	0	5	0
60	0.0957261	0.904274	1	0.911569	6	1
61	0.102736	0.897264	1	0.596104	6	1
62	0.102736	0.897264	1	0.596104	6	0
63	0.103236	0.896764	1	0.977511	7	1
64	0.106813	0.893187	1	0.816541	7	2
65	0.109594	0.890406	1	0.69143	7	3
66	0.113298	0.886702	1	0.524737	7	4
67	0.113945	0.886055	1	0.495617	7	4
68	0.118565	0.881435	1	0.287716	7	5
69	0.118912	0.881088	1	0.272087	7	4
70	0.11914	0.88086	1	0.261831	7	3
71	0.119854	0.880146	1	0.229699	7	2
72	0.121119	0.878881	1	0.172768	7	2
73	0.121341	0.878659	1	0.16281	7	2
74	0.121735	0.878265	1	0.145075	7	1
75	0.121735	0.878265	1	0.145075	7	0
76	0.133322	0.866678	1	0.478584	8	1
77	0.133322	0.866678	1	0.478584	8	0
78	0.133639	0.866361	1	0.985739	9	1
79	0.133639	0.866361	1	0.985739	9	0
80	0.133948	0.866052	1	0.986076	10	1
81	0.133948	0.866052	1	0.986076	10	0
82	0.135398	0.864602	1	0.934739	11	1
83	0.141877	0.858123	1	0.643219	11	2
84	0.146563	0.853437	1	0.432328	11	1
85	0.147041	0.852959	1	0.410825	11	2
86	0.147399	0.852601	1	0.394726	11	2
87	0.147412	0.852588	1	0.394141	11	1
88	0.147412	0.852588	1	0.394141	11	0
89	0.148626	0.851374	1	0.94535	12	1
90	0.148626	0.851374	1	0.94535	12	0
91	0.14867	0.85133	1	0.998013	13	1
92	0.15041	0.84959	1	0.919717	13	2
93	0.152664	0.847336	1	0.818296	13	3
94	0.15682	0.84318	1	0.631283	13	3
95	0.163108	0.836892	1	0.348303	13	3
96	0.164327	0.835673	1	0.293481	13	3
97	0.166198	0.833802	1	0.209287	13	4
98	0.167638	0.832362	1	0.144451	13	4
99	0.167803	0.832197	1	0.137036	13	3
100	0.170848	0.829152	1	0	13	2
101	0.170848	0.829152	1	0	13	1
102	0.170848	0.829152	1	0	13	1
103	0.170848	0.829152	1	0	13	2
104	0.170848	0.829152	1	0	13	2
105	0.170848	0.829152	1	0	13	1
106	0.170848	0.829152	1	0	13	1
107	0.170848	0.829152	1	0	13	0
108	0.171827	0.828173	1	0.95598	14	1
109	0.175413	0.824587	1	0.794607	14	2
110	0.17566	0.82434	1	0.783453	14	3
111	0.178102	0.821898	1	0.673583	14	4
112	0.178283	0.821717	1	0.665433	14	3
113	0.178754	0.821246	1	0.644235	14	4
114	0.179003	0.820997	1	0.633038	14	5
115	0.184438	0.815562	1	0.388447	14	6
116	0.18845	0.81155	1	0.207939	14	5
117	0.193071	0.806929	1	0	14	4
118	0.193071	0.806929	1	0	14	4
119	0.193071	0.806929	1	0	14	5
120	0.193071	0.806929	1	0	14	5
121	0.193071	0.806929	1	0	14	4
122	0.193071	0.806929	1	0	14	4
123	0.193071	0.806929	1	0	14	4
124	0.193071	0.806929	1	0	14	3
125	0.193071	0.806929	1	0	14	3
126	0.193071	0.806929	1	0	14	2
127	0.193071	0.806929	1	0	14	3
128	0.193071	0.806929	1	0	14	3
129	0.193071	0.806929	1	0	14	3
130	0.193071	0.806929	1	0	14	2
131	0.193071	0.806929	1	0	14	1
132	0.193071	0.806929	1	0	14	0
133	0.200235	0.799765	1	0.677598	15	1
134	0.205252	0.794748	1	0.451844	15	1
135	0.206757	0.793243	1	0.384099	15	2
136	0.207188	0.792812	1	0.364704	15	1
137	0.207582	0.792418	1	0.34698	15	1
138	0.207582	0.792418	1	0.34698	15	0
139	0.210289	0.789711	1	0.878178	16	1
140	0.214822	0.785178	1	0.674209	16	1
141	0.214822	0.785178	1	0.674209	16	0
142	0.215162	0.784838	1	0.984708	17	1
143	0.216472	0.783528	1	0.92576	17	2
144	0.216738	0.783262	1	0.913795	17	2
145	0.225997	0.774003	1	0.497102	17	3
146	0.229765	0.770235	1	0.327552	17	4
147	0.230733	0.769267	1	0.284	17	3
148	0.231226	0.768774	1	0.261823	17	3
149	0.234335	0.765665	1	0.121918	17	3
150	0.234854	0.765146	1	0.0985705	17	3
151	0.237044	0.762956	1	0	17	3
152	0.237044	0.762956	1	0	17	3
153	0.237044	0.762956	1	0	17	4
154	0.237044	0.762956	1	0	17	4
155	0.237044	0.762956	1	0	17	3
156	0.237044	0.762956	1	0	17	4
157	0.237044	0.762956	1	0	17	3
158	0.237044	0.762956	1	0	17	2
159	0.237044	0.762956	1	0	17	2
160	0.237044	0.762956	1	0	17	3
161	0.237044	0.762956	1	0	17	2
162	0.237044	0.762956	1	0	17	1
163	0.237044	0.762956	1	0	17	2
164	0.237044	0.762956	1	0	17	1
165	0.237044	0.762956	1	0	17	0
166	0.242379	0.757621	1	0.75995	18	1
167	0.242379	0.757621	1	0.75995	18	0
168	0.243461	0.756539	1	0.951295	19	1
169	0.246667	0.753333	1	0.807037	19	1
170	0.246886	0.753114	1	0.797173	19	1
171	0.248614	0.751386	1	0.71941	19	2
172	0.248969	0.751031	1	0.703432	19	3
173	0.250232	0.749768	1	0.646614	19	4
174	0.25059	0.74941	1	0.630492	19	4
175	0.2532	0.7468	1	0.513047	19	3
176	0.253645	0.746355	1	0.493028	19	2
177	0.264601	0.735399	1	0	19	2
178	0.264601	0.735399	1	0	19	3
179	0.264601	0.735399	1	0	19	3
180	0.264601	0.735399	1	0	19	3
181	0.264601	0.735399	1	0	19	3
182	0.264601	0.735399	1	0	19	2
183	0.264601	0.735399	1	0	19	2
184	0.264601	0.735399	1	0	19	1
185	0.264601	0.735399	1	0	19	1
186	0.264601	0.735399	1	0	19	0
187	0.26525	0.73475	1	0.9708	20	1
188	0.273706	0.726294	1	0.590279	20	2
189	0.274442	0.725558	1	0.557137	20	3
190	0.280812	0.719188	1	0.270496	20	4
191	0.281187	0.718813	1	0.253622	20	4
192	0.28443	0.71557	1	0.107705	20	4
193	0.28577	0.71423	1	0.0473886	20	3
194	0.286589	0.713411	1	0.0105295	20	4
195	0.286823	0.713177	1	0	20	4
196	0.286823	0.713177	1	0	20	3
197	0.286823	0.713177	1	0	20	3
198	0.286823	0.713177	1	0	20	2
199	0.286823	0.713177	1	0	20	2
200	0.286823	0.713177	1	0	20	2
201	0.286823	0.713177	1	0	20	2
202	0.286823	0.713177	1	0	20	1
203	0.286823	0.713177	1	0	20	1
204	0.286823	0.713177	1	0	20	0
205	0.290285	0.709715	1	0.844189	21	1
206	0.290285	0.709715	1	0.844189	21	0
207	0.291987	0.708013	1	0.92344	22	1
208	0.292234	0.707766	1	0.9123	22	2
209	0.292623	0.707377	1	0.894826	22	2
210	0.292729	0.707271	1	0.89003	22	3
211	0.292835	0.707165	1	0.885278	22	2
212	0.293955	0.706045	1	0.834884	22	3
213	0.299271	0.700729	1	0.595666	22	3
214	0.300022	0.699978	1	0.561848	22	2
215	0.300294	0.699706	1	0.549637	22	3
216	0.302949	0.697051	1	0.43013	22	2
217	0.312508	0.687492	1	0	22	1
218	0.312508	0.687492	1	0	22	1
219	0.312508	0.687492	1	0	22	2
220	0.312508	0.687492	1	0	22	1
221	0.312508	0.687492	1	0	22	0
222	0.312713	0.687287	1	0.990754	23	1
223	0.313866	0.686134	1	0.938875	23	2
224	0.314172	0.685828	1	0.925111	23	2
225	0.318643	0.681357	1	0.723921	23	1
226	0.318643	0.681357	1	0.723921	23	0
227	0.320797	0.679203	1	0.903057	24	1
228	0.320797	0.679203	1	0.903057	24	0
229	0.321595	0.678405	1	0.964089	25	1
230	0.321642	0.678358	1	0.961971	25	1
231	0.321875	0.678125	1	0.951494	25	1
232	0.32723	0.67277	1	0.710539	25	2
233	0.327819	0.672181	1	0.684001	25	3
234	0.327855	0.672145	1	0.682409	25	3
235	0.328059	0.671941	1	0.673221	25	3
236	0.328877	0.671123	1	0.636425	25	3
237	0.328889	0.671111	1	0.635872	25	2
238	0.329997	0.670003	1	0.58601	25	1
239	0.329997	0.670003	1	0.58601	25	0
240	0.33194	0.66806	1	0.912557	26	1
241	0.332491	0.667509	1	0.88776	26	2
242	0.333742	0.666258	1	0.831472	26	3
243	0.336983	0.663017	1	0.685632	26	4
244	0.349816	0.650184	1	0.108129	26	5
245	0.350829	0.649171	1	0.0625527	26	5
246	0.351683	0.648317	1	0.0241194	26	4
247	0.351931	0.648069	1	0.0129501	26	3
248	0.352183	0.647817	1	0.00164219	26	2
249	0.352219	0.647781	1	0	26	3
250	0.352219	0.647781	1	0	26	2
251	0.352219	0.647781	1	0	26	2
252	0.352219	0.647781	1	0	26	2
253	0.352219	0.647781	1	0	26	2
254	0.352219	0.647781	1	0	26	2
255	0.352219	0.647781	1	0	26	2
256	0.352219	0.647781	1	0	26	1
257	0.352219	0.647781	1	0	26	1
258	0.352219	0.647781	1	0	26	2
259	0.352219	0.647781	1	0	26	1
260	0.352219	0.647781	1	0	26	0
261	0.356815	0.643185	1	0.793168	27	1
262	0.357867	0.642133	1	0.745855	27	2
263	0.36117	0.63883	1	0.597223	27	2
264	0.363893	0.636107	1	0.474683	27	1
265	0.363893	0.636107	1	0.474683	27	0
266	0.367367	0.632633	1	0.843676	28	1
267	0.368296	0.631704	1	0.801838	28	2
268	0.368464	0.631536	1	0.794281	28	3
269	0.369667	0.630333	1	0.740138	28	2
270	0.37006	0.62994	1	0.722464	28	1
271	0.37006	0.62994	1	0.722464	28	0
272	0.371859	0.628141	1	0.91906	29	1
273	0.373095	0.626905	1	0.863433	29	2
274	0.378414	0.621586	1	0.624103	29	3
275	0.379837	0.620163	1	0.560042	29	3
276	0.381985	0.618015	1	0.463374	29	4
277	0.392282	0.607718	1	0	29	3
278	0.392282	0.607718	1	0	29	2
279	0.392282	0.607718	1	0	29	3
280	0.392282	0.607718	1	0	29	3
281	0.392282	0.607718	1	0	29	2
282	0.392282	0.607718	1	0	29	1
283	0.392282	0.607718	1	0	29	0
284	0.39421	0.60579	1	0.913257	30	1
285	0.39421	0.60579	1	0.913257	30	0
286	0.397228	0.602772	1	0.864206	31	1
287	0.397228	0.602772	1	0.864206	31	0
288	0.398548	0.601452	1	0.940598	32	1
289	0.399492	0.600508	1	0.898125	32	2
290	0.399529	0.600471	1	0.896422	32	2
291	0.399535	0.600465	1	0.89616	32	3
292	0.408886	0.591114	1	0.475386	32	3
293	0.408906	0.591094	1	0.474487	32	2
294	0.409943	0.590057	1	0.427822	32	1
295	0.409943	0.590057	1	0.427822	32	0
296	0.415008	0.584992	1	0.772071	33	1
297	0.415008	0.584992	1	0.772071	33	0
298	0.415977	0.584023	1	0.95638	34	1
299	0.416035	0.583965	1	0.953796	34	2
300	0.42115	0.57885	1	0.723594	34	3
301	0.421299	0.578701	1	0.716914	34	4
302	0.422707	0.577293	1	0.653546	34	3
303	0.424014	0.575986	1	0.59474	34	2
304	0.425798	0.574202	1	0.514465	34	3
305	0.426176	0.573824	1	0.497415	34	4
306	0.426726	0.573274	1	0.472671	34	3
307	0.429697	0.570303	1	0.338985	34	4
308	0.432415	0.567585	1	0.216703	34	3
309	0.433423	0.566577	1	0.171301	34	2
310	0.433616	0.566384	1	0.162657	34	1
311	0.433616	0.566384	1	0.162657	34	0
312	0.435185	0.564815	1	0.929389	35	1
313	0.435185	0.564815	1	0.929389	35	0
314	0.435198	0.564802	1	0.999394	36	1
315	0.435198	0.564802	1	0.999394	36	0
316	0.436979	0.563021	1	0.91986	37	1
317	0.437297	0.562703	1	0.905546	37	2
318	0.43753	0.56247	1	0.895064	37	3
319	0.43862	0.56138	1	0.846003	37	2
320	0.440857	0.559143	1	0.745337	37	3
321	0.441307	0.558693	1	0.725084	37	2
322	0.441809	0.558191	1	0.702528	37	2
323	0.441903	0.558097	1	0.698269	37	1
324	0.441903	0.558097	1	0.698269	37	0
325	0.446809	0.553191	1	0.779238	38	1
326	0.447711	0.552289	1	0.738662	38	2
327	0.448331	0.551669	1	0.710761	38	3
328	0.448358	0.551642	1	0.70953	38	3
329	0.44851	0.55149	1	0.702676	38	4
330	0.448675	0.551325	1	0.695259	38	5
331	0.44871	0.55129	1	0.693682	38	6
332	0.450188	0.549812	1	0.627201	38	6
333	0.450322	0.549678	1	0.621172	38	5
334	0.450548	0.549452	1	0.610996	38	5
335	0.454175	0.545825	1	0.447779	38	6
336	0.454391	0.545609	1	0.438066	38	5
337	0.454667	0.545333	1	0.425623	38	6
338	0.455568	0.544432	1	0.385065	38	5
339	0.455762	0.544238	1	0.376349	38	4
340	0.457097	0.542903	1	0.316276	38	3
341	0.457429	0.542571	1	0.301361	38	2
342	0.459475	0.540525	1	0.20926	38	1
343	0.459475	0.540525	1	0.20926	38	0
344	0.463945	0.536055	1	0.798855	39	1
345	0.464897	0.535103	1	0.756012	39	1
346	0.464897	0.535103	1	0.756012	39	0
347	0.466717	0.533283	1	0.918118	40	1
348	0.467865	0.532135	1	0.866466	40	2
349	0.470668	0.529332	1	0.740319	40	1
350	0.470668	0.529332	1	0.740319	40	0
351	0.476397	0.523603	1	0.74219	41	1
352	0.476397	0.523603	1	0.74219	41	0
353	0.476536	0.523464	1	0.993724	42	1
354	0.476536	0.523464	1	0.993724	42	0
355	0.476927	0.523073	1	0.98243	43	1
356	0.476927	0.523073	1	0.98243	43	0
357	0.478369	0.521631	1	0.935127	44	1
358	0.479697	0.520303	1	0.875361	44	1
359	0.479697	0.520303	1	0.875361	44	0
360	0.483046	0.516954	1	0.849278	45	1
361	0.483046	0.516954	1	0.849278	45	0
362	0.484432	0.515568	1	0.93765	46	1
363	0.484432	0.515568	1	0.93765	46	0
364	0.484673	0.515327	1	0.989123	47	1
365	0.485041	0.514959	1	0.972568	47	1
366	0.48536	0.51464	1	0.958243	47	2
367	0.487854	0.512146	1	0.846013	47	3
368	0.488429	0.511571	1	0.820101	47	4
369	0.488861	0.511139	1	0.800668	47	3
370	0.489787	0.510213	1	0.759006	47	4
371	0.489853	0.510147	1	0.756029	47	3
372	0.490344	0.509656	1	0.733959	47	3
373	0.492526	0.507474	1	0.635772	47	4
374	0.492529	0.507471	1	0.635636	47	3
375	0.493533	0.506467	1	0.590453	47	4
376	0.49359	0.50641	1	0.587852	47	3
377	0.493869	0.506131	1	0.575315	47	2
378	0.49453	0.50547	1	0.545575	47	3
379	0.497799	0.502201	1	0.398458	47	2
380	0.498436	0.501564	1	0.369784	47	2
381	0.498535	0.501465	1	0.365367	47	1
382	0.498535	0.501465	1	0.365367	47	0
383	0.500463	0.499537	1	0.913224	48	1
384	0.500511	0.499489	1	0.911075	48	2
385	0.500512	0.499488	1	0.911025	48	2
386	0.500548	0.499452	1	0.909378	48	2
387	0.500575	0.499425	1	0.908175	48	2
388	0.500611	0.499389	1	0.906578	48	3
389	0.501834	0.498166	1	0.851507	48	4
390	0.501944	0.498056	1	0.846597	48	5
391	0.501948	0.498052	1	0.846391	48	5
392	0.502081	0.497919	1	0.840428	48	4
393	0.502087	0.497913	1	0.840147	48	5
394	0.505019	0.494981	1	0.708209	48	4
395	0.505063	0.494937	1	0.706212	48	5
396	0.505628	0.494372	1	0.680798	48	4
397	0.505724	0.494276	1	0.676492	48	5
398	0.508181	0.491819	1	0.565907	48	4
399	0.508535	0.491465	1	0.549961	48	3
400	0.512138	0.487862	1	0.387856	48	4
401	0.512207	0.487793	1	0.384731	48	5
402	0.512875	0.487125	1	0.354677	48	4
403	0.513049	0.486951	1	0.346855	48	3
404	0.513144	0.486856	1	0.342584	48	2
405	0.518071	0.481929	1	0.120873	48	1
406	0.518071	0.481929	1	0.120873	48	0
407	0.520339	0.479661	1	0.897913	49	1
408	0.520461	0.479539	1	0.892441	49	2
409	0.520621	0.479379	1	0.885238	49	1
410	0.520621	0.479379	1	0.885238	49	0
411	0.522942	0.477058	1	0.895572	50	1
412	0.522942	0.477058	1	0.895572	50	0
413	0.524361	0.475639	1	0.936125	51	1
414	0.524361	0.475639	1	0.936125	51	0
415	0.526164	0.473836	1	0.918889	52	1
416	0.526478	0.473522	1	0.904736	52	2
417	0.526626	0.473374	1	0.898085	52	2
418	0.526736	0.473264	1	0.893138	52	1
419	0.527056	0.472944	1	0.878721	52	2
420	0.529192	0.470808	1	0.782589	52	2
421	0.530981	0.469019	1	0.702121	52	3
422	0.531448	0.468552	1	0.681067	52	3
423	0.531467	0.468533	1	0.680221	52	2
424	0.53151	0.46849	1	0.678318	52	2
425	0.533587	0.466413	1	0.584836	52	1
426	0.533598	0.466402	1	0.584325	52	2
427	0.538636	0.461364	1	0.357617	52	1
428	0.539585	0.460415	1	0.314921	52	1
429	0.539585	0.460415	1	0.314921	52	0
430	0.541374	0.458626	1	0.919512	53	1
431	0.543057	0.456943	1	0.843768	53	1
432	0.543416	0.456584	1	0.827619	53	2
433	0.544123	0.455877	1	0.795771	53	1
434	0.546495	0.453505	1	0.689067	53	2
435	0.548791	0.451209	1	0.585711	53	3
436	0.551447	0.448553	1	0.466212	53	2
437	0.552184	0.447816	1	0.433067	53	1
438	0.552732	0.447268	1	0.408379	53	1
439	0.552732	0.447268	1	0.408379	53	0
440	0.554712	0.445288	1	0.910895	54	1
441	0.555182	0.444818	1	0.889757	54	2
442	0.555348	0.444652	1	0.882287	54	3
443	0.555523	0.444477	1	0.874427	54	4
444	0.557199	0.442801	1	0.799003	54	4
445	0.557482	0.442518	1	0.786238	54	4
446	0.557965	0.442035	1	0.764516	54	3
447	0.558519	0.441481	1	0.739599	54	4
448	0.558628	0.441372	1	0.734667	54	5
449	0.558807	0.441193	1	0.726618	54	6
450	0.561601	0.438399	1	0.600904	54	5
451	0.562804	0.437196	1	0.54676	54	6
452	0.563013	0.436987	1	0.537365	54	6
453	0.563686	0.436314	1	0.507061	54	5
454	0.563775	0.436225	1	0.50306	54	6
455	0.563809	0.436191	1	0.501521	54	5
456	0.565665	0.434335	1	0.418035	54	6
457	0.566219	0.433781	1	0.393079	54	7
458	0.566274	0.433726	1	0.390613	54	6
459	0.566338	0.433662	1	0.387741	54	5
460	0.566775	0.433225	1	0.368063	54	4
461	0.567838	0.432162	1	0.320243	54	3
462	0.568356	0.431644	1	0.296947	54	2
463	0.571611	0.428389	1	0.150461	54	1
464	0.572028	0.427972	1	0.131683	54	2
465	0.572049	0.427951	1	0.130759	54	3
466	0.572836	0.427164	1	0.0953298	54	4
467	0.573846	0.426154	1	0.0498915	54	3
468	0.574094	0.425906	1	0.0387282	54	2
469	0.574954	0.425046	1	0	54	1
470	0.574954	0.425046	1	0	54	0
471	0.577003	0.422997	1	0.907819	55	1
472	0.586743	0.413257	1	0.469535	55	1
473	0.586743	0.413257	1	0.469535	55	0
474	0.587691	0.412309	1	0.957315	56	1
475	0.587691	0.412309	1	0.957315	56	0
476	0.587794	0.412206	1	0.99535	57	1
477	0.591024	0.408976	1	0.850026	57	2
478	0.594511	0.405489	1	0.69312	57	2
479	0.594616	0.405384	1	0.688384	57	3
480	0.594829	0.405171	1	0.678793	57	4
481	0.595498	0.404502	1	0.64867	57	5
482	0.595674	0.404326	1	0.640754	57	4
483	0.595955	0.404045	1	0.628117	57	3
484	0.597378	0.402622	1	0.564092	57	2
485	0.600345	0.399655	1	0.430571	57	3
486	0.602174	0.397826	1	0.348286	57	3
487	0.602982	0.397018	1	0.311901	57	3
488	0.603573	0.396427	1	0.285309	57	2
489	0.604339	0.395661	1	0.250865	57	2
490	0.605283	0.394717	1	0.208361	57	2
491	0.605449	0.394551	1	0.200888	57	3
492	0.606584	0.393416	1	0.14984	57	3
493	0.608098	0.391902	1	0.0816709	57	2
494	0.608784	0.391216	1	0.0508181	57	2
495	0.608843	0.391157	1	0.0481431	57	1
496	0.608843	0.391157	1	0.0481431	57	0
497	0.609347	0.390653	1	0.977356	58	1
498	0.609347	0.390653	1	0.977356	58	0
499	0.609796	0.390204	1	0.979775	59	1
500	0.613099	0.386901	1	0.831151	59	2
501	0.613439	0.386561	1	0.815834	59	3
502	0.613765	0.386235	1	0.801173	59	4
503	0.613913	0.386087	1	0.794507	59	4
504	0.613994	0.386006	1	0.79088	59	3
505	0.618605	0.381395	1	0.583369	59	2
506	0.618724	0.381276	1	0.578032	59	2
507	0.619403	0.380597	1	0.547487	59	2
508	0.620753	0.379247	1	0.486736	59	1
509	0.620834	0.379166	1	0.483058	59	2
510	0.621261	0.378739	1	0.463857	59	3
511	0.621468	0.378532	1	0.454556	59	4
512	0.622704	0.377296	1	0.398932	59	5
513	0.622713	0.377287	1	0.398518	59	4
514	0.623043	0.376957	1	0.383674	59	3
515	0.623224	0.376776	1	0.375531	59	2
516	0.623235	0.376765	1	0.375024	59	1
517	0.626501	0.373499	1	0.228047	59	1
518	0.626501	0.373499	1	0.228047	59	0
519	0.62744	0.37256	1	0.95777	60	1
520	0.627738	0.372262	1	0.944332	60	2
521	0.627793	0.372207	1	0.941862	60	2
522	0.627798	0.372202	1	0.94165	60	3
523	0.627946	0.372054	1	0.934983	60	2
524	0.628191	0.371809	1	0.923957	60	2
525	0.628203	0.371797	1	0.923419	60	2
526	0.628968	0.371032	1	0.888971	60	1
527	0.628968	0.371032	1	0.888971	60	0
528	0.62912	0.37088	1	0.993191	61	1
529	0.629342	0.370658	1	0.983207	61	2
530	0.630916	0.369084	1	0.912375	61	2
531	0.630939	0.369061	1	0.911306	61	3
532	0.632479	0.367521	1	0.842026	61	4
533	0.632547	0.367453	1	0.838959	61	3
534	0.633046	0.366954	1	0.816499	61	4
535	0.633899	0.366101	1	0.778136	61	5
536	0.635129	0.364871	1	0.722797	61	4
537	0.635732	0.364268	1	0.695649	61	4
538	0.635874	0.364126	1	0.689271	61	3
539	0.635887	0.364113	1	0.688678	61	3
540	0.636017	0.363983	1	0.682797	61	4
541	0.636087	0.363913	1	0.679673	61	3
542	0.64098	0.35902	1	0.459476	61	2
543	0.641471	0.358529	1	0.437374	61	3
544	0.641564	0.358436	1	0.433213	61	4
545	0.64157	0.35843	1	0.432943	61	3
546	0.641574	0.358426	1	0.432761	61	3
547	0.641691	0.358309	1	0.427469	61	2
548	0.64193	0.35807	1	0.416734	61	2
549	0.642297	0.357703	1	0.400232	61	2
550	0.642437	0.357563	1	0.393924	61	1
551	0.643401	0.356599	1	0.350527	61	2
552	0.643705	0.356295	1	0.336841	61	2
553	0.643828	0.356172	1	0.331339	61	2
554	0.643952	0.356048	1	0.32573	61	2
555	0.644085	0.355915	1	0.31975	61	1
556	0.644085	0.355915	1	0.31975	61	0
557	0.64736	0.35264	1	0.85261	62	1
558	0.64736	0.35264	1	0.85261	62	0
559	0.647371	0.352629	1	0.999549	63	1
560	0.647685	0.352315	1	0.985392	63	2
561	0.648071	0.351929	1	0.96803	63	2
562	0.648509	0.351491	1	0.948326	63	3
563	0.648536	0.351464	1	0.947108	63	4
564	0.648647	0.351353	1	0.942119	63	5
565	0.651448	0.348552	1	0.816066	63	6
566	0.651464	0.348536	1	0.81535	63	5
567	0.653134	0.346866	1	0.740174	63	6
568	0.653143	0.346857	1	0.739781	63	5
569	0.653262	0.346738	1	0.734416	63	6
570	0.653565	0.346435	1	0.720819	63	7
571	0.660056	0.339944	1	0.428711	63	6
572	0.664131	0.335869	1	0.245348	63	7
573	0.664134	0.335866	1	0.245211	63	8
574	0.664336	0.335664	1	0.236095	63	8
575	0.665304	0.334696	1	0.192528	63	7
576	0.665612	0.334388	1	0.178662	63	7
577	0.665628	0.334372	1	0.177952	63	6
578	0.665875	0.334125	1	0.166869	63	5
579	0.665954	0.334046	1	0.163278	63	4
580	0.666529	0.333471	1	0.137415	63	3
581	0.66674	0.33326	1	0.127925	63	4
582	0.666745	0.333255	1	0.127677	63	4
583	0.666754	0.333246	1	0.127293	63	4
584	0.667668	0.332332	1	0.0861539	63	3
585	0.667724	0.332276	1	0.0836202	63	4
586	0.667864	0.332136	1	0.0773331	63	3
587	0.668255	0.331745	1	0.0597367	63	2
588	0.669583	0.330417	1	0	63	1
589	0.669583	0.330417	1	0	63	1
590	0.669583	0.330417	1	0	63	0
591	0.669765	0.330235	1	0.991817	64	1
592	0.669944	0.330056	1	0.983737	64	2
593	0.669957	0.330043	1	0.983175	64	1
594	0.67001	0.32999	1	0.98079	64	2
595	0.672649	0.327351	1	0.862009	64	3
596	0.672683	0.327317	1	0.860502	64	3
597	0.677135	0.322865	1	0.660145	64	2
598	0.67727	0.32273	1	0.654052	64	1
599	0.677315	0.322685	1	0.652031	64	1
600	0.677781	0.322219	1	0.631081	64	2
601	0.677882	0.322118	1	0.626527	64	3
602	0.677894	0.322106	1	0.625988	64	3
603	0.678101	0.321899	1	0.616682	64	4
604	0.678622	0.321378	1	0.593245	64	4
605	0.678729	0.321271	1	0.588421	64	3
606	0.679118	0.320882	1	0.570924	64	4
607	0.679386	0.320614	1	0.558832	64	5
608	0.679639	0.320361	1	0.547447	64	4
609	0.682417	0.317583	1	0.42247	64	5
610	0.682708	0.317292	1	0.409353	64	4
611	0.683067	0.316933	1	0.393224	64	4
612	0.683378	0.316622	1	0.379233	64	5
613	0.683462	0.316538	1	0.375417	64	6
614	0.68653	0.31347	1	0.237352	64	5
615	0.687922	0.312078	1	0.17473	64	4
616	0.687938	0.312062	1	0.173996	64	3
617	0.688092	0.311908	1	0.167092	64	2
618	0.68814	0.31186	1	0.164924	64	1
619	0.689563	0.310437	1	0.100886	64	2
620	0.690201	0.309799	1	0.0721988	64	2
621	0.690776	0.309224	1	0.0462954	64	1
622	0.690776	0.309224	1	0.0462954	64	0
623	0.691173	0.308827	1	0.982133	65	1
624	0.691385	0.308615	1	0.972623	65	1
625	0.691385	0.308615	1	0.972623	65	0
626	0.691574	0.308426	1	0.991478	66	1
627	0.691574	0.308426	1	0.991478	66	0
628	0.692115	0.307885	1	0.975636	67	1
629	0.692115	0.307885	1	0.975636	67	0
630	0.692204	0.307796	1	0.996018	68	1
631	0.69232	0.30768	1	0.990785	68	1
632	0.692749	0.307251	1	0.97147	68	2
633	0.693254	0.306746	1	0.948767	68	3
634	0.698435	0.301565	1	0.715614	68	4
635	0.699922	0.300078	1	0.6487	68	5
636	0.701003	0.298997	1	0.60005	68	5
637	0.701144	0.298856	1	0.59372	68	4
638	0.702635	0.297365	1	0.526633	68	5
639	0.703175	0.296825	1	0.502313	68	6
640	0.703994	0.296006	1	0.465454	68	5
641	0.705198	0.294802	1	0.411287	68	5
642	0.705276	0.294724	1	0.407792	68	4
643	0.705699	0.294301	1	0.388721	68	4
644	0.705711	0.294289	1	0.388176	68	4
645	0.707927	0.292073	1	0.288484	68	3
646	0.71086	0.28914	1	0.156479	68	3
647	0.711613	0.288387	1	0.122582	68	2
648	0.711728	0.288272	1	0.117439	68	2
649	0.711834	0.288166	1	0.112653	68	1
650	0.711834	0.288166	1	0.112653	68	0
651	0.712094	0.287906	1	0.988288	69	1
652	0.712245	0.287755	1	0.981497	69	2
653	0.722599	0.277401	1	0.515596	69	3
654	0.724468	0.275532	1	0.431459	69	3
655	0.724859	0.275141	1	0.413873	69	3
656	0.726484	0.273516	1	0.340754	69	2
657	0.726553	0.273447	1	0.337659	69	1
658	0.729087	0.270913	1	0.223607	69	2
659	0.729214	0.270786	1	0.21792	69	2
660	0.729274	0.270726	1	0.21519	69	1
661	0.729274	0.270726	1	0.21519	69	0
662	0.729355	0.270645	1	0.996391	70	1
663	0.72955	0.27045	1	0.987598	70	2
664	0.729771	0.270229	1	0.977649	70	3
665	0.732222	0.267778	1	0.867358	70	4
666	0.732372	0.267628	1	0.860615	70	3
667	0.732998	0.267002	1	0.832424	70	4
668	0.733705	0.266295	1	0.800607	70	5
669	0.734569	0.265431	1	0.76176	70	6
670	0.735866	0.264134	1	0.703367	70	5
671	0.740558	0.259442	1	0.492222	70	5
672	0.748319	0.251681	1	0.14299	70	6
673	0.748396	0.251604	1	0.139533	70	7
674	0.748966	0.251034	1	0.113892	70	6
675	0.749149	0.250851	1	0.105662	70	6
676	0.749866	0.250134	1	0.0733593	70	6
677	0.750833	0.249167	1	0.0298435	70	5
678	0.751497	0.248503	1	0	70	4
679	0.751497	0.248503	1	0	70	3
680	0.751497	0.248503	1	0	70	3
681	0.751497	0.248503	1	0	70	3
682	0.751497	0.248503	1	0	70	2
683	0.751497	0.248503	1	0	70	3
684	0.751497	0.248503	1	0	70	3
685	0.751497	0.248503	1	0	70	2
686	0.751497	0.248503	1	0	70	1
687	0.751497	0.248503	1	0	70	0
688	0.751505	0.248495	1	0.999622	71	1
689	0.751505	0.248495	1	0.999622	71	0
690	0.754024	0.245976	1	0.886637	72	1
691	0.755333	0.244667	1	0.827725	72	1
692	0.759079	0.240921	1	0.659191	72	2
693	0.759337	0.240663	1	0.647545	72	2
694	0.761611	0.238389	1	0.545235	72	3
695	0.761655	0.238345	1	0.543272	72	4
696	0.76225	0.23775	1	0.516494	72	5
697	0.762594	0.237406	1	0.50099	72	4
698	0.763151	0.236849	1	0.475924	72	3
699	0.76568	0.23432	1	0.362103	72	3
700	0.767166	0.232834	1	0.295243	72	3
701	0.767221	0.232779	1	0.292796	72	4
702	0.768133	0.231867	1	0.251754	72	3
703	0.769819	0.230181	1	0.17587	72	3
704	0.770718	0.229282	1	0.135415	72	2
705	0.770914	0.229086	1	0.126607	72	1
706	0.770914	0.229086	1	0.126607	72	0
707	0.774398	0.225602	1	0.843204	73	1
708	0.777826	0.222174	1	0.688944	73	1
709	0.777826	0.222174	1	0.688944	73	0
710	0.777961	0.222039	1	0.993926	74	1
711	0.778908	0.221092	1	0.951299	74	1
712	0.779516	0.220484	1	0.923938	74	2
713	0.779687	0.220313	1	0.916257	74	2
714	0.7798	0.2202	1	0.91118	74	1
715	0.7798	0.2202	1	0.91118	74	0
716	0.780957	0.219043	1	0.947919	75	1
717	0.780957	0.219043	1	0.947919	75	0
718	0.782739	0.217261	1	0.919831	76	1
719	0.782739	0.217261	1	0.919831	76	0
720	0.782791	0.217209	1	0.997628	77	1
721	0.782791	0.217209	1	0.997628	77	0
722	0.783639	0.216361	1	0.961877	78	1
723	0.783963	0.216037	1	0.947301	78	2
724	0.786104	0.213896	1	0.850919	78	3
725	0.789581	0.210419	1	0.69449	78	4
726	0.790027	0.209973	1	0.674398	78	3
727	0.790069	0.209931	1	0.672515	78	3
728	0.790145	0.209855	1	0.669075	78	2
729	0.790241	0.209759	1	0.664754	78	2
730	0.790344	0.209656	1	0.660124	78	3
731	0.790354	0.209646	1	0.659688	78	3
732	0.790486	0.209514	1	0.653747	78	2
733	0.790496	0.209504	1	0.653312	78	3
734	0.790639	0.209361	1	0.646871	78	4
735	0.790698	0.209302	1	0.644198	78	5
736	0.79189	0.20811	1	0.590559	78	6
737	0.791924	0.208076	1	0.589051	78	7
738	0.793498	0.206502	1	0.518205	78	6
739	0.793635	0.206365	1	0.512038	78	7
740	0.793676	0.206324	1	0.510206	78	6
741	0.793995	0.206005	1	0.495853	78	7
742	0.794017	0.205983	1	0.494858	78	8
743	0.794331	0.205669	1	0.480735	78	7
744	0.797417	0.202583	1	0.341872	78	6
745	0.797438	0.202562	1	0.340898	78	5
746	0.797605	0.202395	1	0.333413	78	4
747	0.797633	0.202367	1	0.332153	78	3
748	0.797677	0.202323	1	0.330161	78	4
749	0.797736	0.202264	1	0.327486	78	3
750	0.797814	0.202186	1	0.323976	78	3
751	0.797916	0.202084	1	0.319382	78	3
752	0.79814	0.20186	1	0.30933	78	3
753	0.798185	0.201815	1	0.307291	78	2
754	0.799727	0.200273	1	0.237923	78	1
755	0.799727	0.200273	1	0.237923	78	0
756	0.799822	0.200178	1	0.995714	79	1
757	0.80074	0.19926	1	0.954388	79	2
758	0.80078	0.19922	1	0.952588	79	1
759	0.800846	0.199154	1	0.949638	79	2
760	0.800859	0.199141	1	0.94904	79	1
761	0.800925	0.199075	1	0.946057	79	1
762	0.801308	0.198692	1	0.928853	79	2
763	0.801357	0.198643	1	0.92663	79	2
764	0.802469	0.197531	1	0.87658	79	3
765	0.803878	0.196122	1	0.813174	79	4
766	0.806478	0.193522	1	0.696174	79	3
767	0.807768	0.192232	1	0.638121	79	4
768	0.807783	0.192217	1	0.637471	79	3
769	0.808005	0.191995	1	0.627487	79	4
770	0.811485	0.188515	1	0.470873	79	3
771	0.81238	0.18762	1	0.430582	79	3
772	0.813326	0.186674	1	0.388047	79	3
773	0.813493	0.186507	1	0.380497	79	2
774	0.813513	0.186487	1	0.379608	79	2
775	0.813525	0.186475	1	0.379079	79	2
776	0.813525	0.186475	1	0.379055	79	2
777	0.813698	0.186302	1	0.371287	79	1
778	0.814114	0.185886	1	0.352564	79	1
779	0.814114	0.185886	1	0.352564	79	0
780	0.814662	0.185338	1	0.975342	80	1
781	0.814662	0.185338	1	0.975342	80	0
782	0.814977	0.185023	1	0.985831	81	1
783	0.815327	0.184673	1	0.970063	81	2
784	0.815391	0.184609	1	0.967206	81	3
785	0.815536	0.184464	1	0.960659	81	4
786	0.816687	0.183313	1	0.908868	81	4
787	0.817406	0.182594	1	0.876508	81	5
788	0.817871	0.182129	1	0.855596	81	6
789	0.818163	0.181837	1	0.842459	81	7
790	0.818192	0.181808	1	0.841153	81	7
791	0.81877	0.18123	1	0.815117	81	8
792	0.818788	0.181212	1	0.814313	81	9
793	0.820226	0.179774	1	0.749615	81	8
794	0.82029	0.17971	1	0.746751	81	9
795	0.821794	0.178206	1	0.679062	81	8
796	0.822416	0.177584	1	0.651091	81	7
797	0.822513	0.177487	1	0.646703	81	8
798	0.822819	0.177181	1	0.632923	81	8
799	0.822866	0.177134	1	0.630821	81	9
800	0.823308	0.176692	1	0.610935	81	10
801	0.824744	0.175256	1	0.5463	81	11
802	0.825938	0.174062	1	0.492598	81	12
803	0.826315	0.173685	1	0.47563	81	11
804	0.832401	0.167599	1	0.201744	81	12
805	0.832401	0.167599	1	0.201739	81	13
806	0.83324	0.16676	1	0.163991	81	12
807	0.833323	0.166677	1	0.160247	81	11
808	0.834463	0.165537	1	0.10897	81	11
809	0.83535	0.16465	1	0.0690303	81	10
810	0.83587	0.16413	1	0.0456553	81	10
811	0.835895	0.164105	1	0.0445236	81	9
812	0.836403	0.163597	1	0.0216514	81	8
813	0.836435	0.163565	1	0.0201957	81	7
814	0.836466	0.163534	1	0.0187993	81	6
815	0.83647	0.16353	1	0.0186514	81	7
816	0.836884	0.163116	1	0	81	6
817	0.836884	0.163116	1	0	81	7
818	0.836884	0.163116	1	0	81	8
819	0.836884	0.163116	1	0	81	7
820	0.836884	0.163116	1	0	81	6
821	0.836884	0.163116	1	0	81	7
822	0.836884	0.163116	1	0	81	6
823	0.836884	0.163116	1	0	81	7
824	0.836884	0.163116	1	0	81	8
825	0.836884	0.163116	1	0	81	7
826	0.836884	0.163116	1	0	81	7
827	0.836884	0.163116	1	0	81	6
828	0.836884	0.163116	1	0	81	6
829	0.836884	0.163116	1	0	81	7
830	0.836884	0.163116	1	0	81	7
831	0.836884	0.163116	1	0	81	6
832	0.836884	0.163116	1	0	81	7
833	0.836884	0.163116	1	0	81	7
834	0.836884	0.163116	1	0	81	7
835	0.836884	0.163116	1	0	81	8
836	0.836884	0.163116	1	0	81	7
837	0.836884	0.163116	1	0	81	7
838	0.836884	0.163116	1	0	81	6
839	0.836884	0.163116	1	0	81	7
840	0.836884	0.163116	1	0	81	6
841	0.836884	0.163116	1	0	81	5
842	0.836884	0.163116	1	0	81	4
843	0.836884	0.163116	1	0	81	3
844	0.836884	0.163116	1	0	81	3
845	0.836884	0.163116	1	0	81	2
846	0.836884	0.163116	1	0	81	1
847	0.836884	0.163116	1	0	81	0
848	0.849806	0.150194	1	0.418499	82	1
849	0.849832	0.150168	1	0.417366	82	1
850	0.849832	0.150168	1	0.417366	82	0
851	0.849913	0.150087	1	0.996318	83	1
852	0.849939	0.150061	1	0.995186	83	2
853	0.849997	0.150003	1	0.99258	83	3
854	0.850553	0.149447	1	0.967533	83	3
855	0.851939	0.148061	1	0.905156	83	4
856	0.852079	0.147921	1	0.898849	83	5
857	0.852241	0.147759	1	0.891576	83	6
858	0.852365	0.147635	1	0.886001	83	5
859	0.852393	0.147607	1	0.88476	83	5
860	0.853039	0.146961	1	0.855653	83	6
861	0.853777	0.146223	1	0.822448	83	6
862	0.859799	0.140201	1	0.551447	83	6
863	0.860036	0.139964	1	0.540806	83	5
864	0.860174	0.139826	1	0.534589	83	5
865	0.860186	0.139814	1	0.534057	83	6
866	0.860221	0.139779	1	0.532471	83	7
867	0.860236	0.139764	1	0.53181	83	7
868	0.860248	0.139752	1	0.531253	83	8
869	0.860328	0.139672	1	0.527644	83	8
870	0.860397	0.139603	1	0.524574	83	7
871	0.860538	0.139462	1	0.518205	83	8
872	0.860614	0.139386	1	0.514782	83	9
873	0.862329	0.137671	1	0.437605	83	10
874	0.862347	0.137653	1	0.436829	83	9
875	0.862389	0.137611	1	0.43491	83	9
876	0.862402	0.137598	1	0.434322	83	9
877	0.862411	0.137589	1	0.433923	83	9
878	0.862424	0.137576	1	0.43335	83	8
879	0.862473	0.137527	1	0.431126	83	7
880	0.862525	0.137475	1	0.428818	83	8
881	0.862529	0.137471	1	0.428626	83	8
882	0.862534	0.137466	1	0.428375	83	7
883	0.864213	0.135787	1	0.352855	83	6
884	0.864453	0.135547	1	0.342029	83	5
885	0.864492	0.135508	1	0.340297	83	5
886	0.864854	0.135146	1	0.323994	83	4
887	0.865228	0.134772	1	0.307147	83	4
888	0.865659	0.134341	1	0.287772	83	3
889	0.865769	0.134231	1	0.2828	83	2
890	0.866039	0.133961	1	0.270662	83	1
891	0.866084	0.133916	1	0.268653	83	1
892	0.866737	0.133263	1	0.239279	83	2
893	0.867738	0.132262	1	0.194211	83	3
894	0.867865	0.132135	1	0.188501	83	4
895	0.867882	0.132118	1	0.187719	83	5
896	0.869783	0.130217	1	0.102177	83	6
897	0.869791	0.130209	1	0.101829	83	7
898	0.869796	0.130204	1	0.10159	83	6
899	0.870055	0.129945	1	0.0899449	83	5
900	0.871007	0.128993	1	0.047114	83	4
901	0.871042	0.128958	1	0.0455248	83	4
902	0.871704	0.128296	1	0.0157395	83	4
903	0.872054	0.127946	1	0	83	3
904	0.872054	0.127946	1	0	83	3
905	0.872054	0.127946	1	0	83	2
906	0.872054	0.127946	1	0	83	3
907	0.872054	0.127946	1	0	83	4
908	0.872054	0.127946	1	0	83	4
909	0.872054	0.127946	1	0	83	3
910	0.872054	0.127946	1	0	83	4
911	0.872054	0.127946	1	0	83	4
912	0.872054	0.127946	1	0	83	3
913	0.872054	0.127946	1	0	83	4
914	0.872054	0.127946	1	0	83	5
915	0.872054	0.127946	1	0	83	4
916	0.872054	0.127946	1	0	83	3
917	0.872054	0.127946	1	0	83	2
918	0.872054	0.127946	1	0	83	1
919	0.872054	0.127946	1	0	83	2
920	0.872054	0.127946	1	0	83	1
921	0.872054	0.127946	1	0	83	0
922	0.872394	0.127606	1	0.984687	84	1
923	0.872394	0.127606	1	0.984687	84	0
924	0.872433	0.127567	1	0.998269	85	1
925	0.872433	0.127567	1	0.998269	85	0
926	0.872452	0.127548	1	0.999109	86	1
927	0.872574	0.127426	1	0.993632	86	2
928	0.87258	0.12742	1	0.99338	86	2
929	0.872899	0.127101	1	0.979006	86	3
930	0.872926	0.127074	1	0.977777	86	4
931	0.873447	0.126553	1	0.95435	86	3
932	0.873504	0.126496	1	0.9518	86	4
933	0.87447	0.12553	1	0.908331	86	3
934	0.874526	0.125474	1	0.90579	86	2
935	0.874534	0.125466	1	0.905433	86	1
936	0.874534	0.125466	1	0.905433	86	0
937	0.874537	0.125463	1	0.99986	87	1
938	0.874611	0.125389	1	0.996553	87	2
939	0.874649	0.125351	1	0.994825	87	2
940	0.875656	0.124344	1	0.949493	87	3
941	0.875982	0.124018	1	0.934834	87	3
942	0.876195	0.123805	1	0.92528	87	4
943	0.876608	0.123392	1	0.90666	87	3
944	0.87675	0.12325	1	0.900299	87	4
945	0.877824	0.122176	1	0.851959	87	5
946	0.877839	0.122161	1	0.851278	87	6
947	0.878129	0.121871	1	0.838249	87	7
948	0.87816	0.12184	1	0.836815	87	8
949	0.87836	0.12164	1	0.827846	87	9
950	0.878463	0.121537	1	0.823196	87	10
951	0.878565	0.121435	1	0.81863	87	10
952	0.878838	0.121162	1	0.806338	87	11
953	0.878844	0.121156	1	0.806049	87	10
954	0.878877	0.121123	1	0.804591	87	11
955	0.879126	0.120874	1	0.793365	87	12
956	0.879299	0.120701	1	0.785569	87	11
957	0.879337	0.120663	1	0.783861	87	12
958	0.879752	0.120248	1	0.765213	87	13
959	0.880372	0.119628	1	0.737296	87	13
960	0.880409	0.119591	1	0.735633	87	14
961	0.880424	0.119576	1	0.734938	87	14
962	0.880468	0.119532	1	0.732992	87	15
963	0.880498	0.119502	1	0.731626	87	14
964	0.880547	0.119453	1	0.729426	87	14
965	0.880589	0.119411	1	0.727513	87	13
966	0.880673	0.119327	1	0.723746	87	14
967	0.880702	0.119298	1	0.722449	87	13
968	0.880813	0.119187	1	0.717457	87	14
969	0.880815	0.119185	1	0.717379	87	14
970	0.88097	0.11903	1	0.710369	87	15
971	0.881897	0.118103	1	0.668678	87	16
972	0.881946	0.118054	1	0.666458	87	17
973	0.883614	0.116386	1	0.591409	87	16
974	0.885985	0.114015	1	0.484697	87	16
975	0.886218	0.113782	1	0.474229	87	15
976	0.886238	0.113762	1	0.473313	87	14
977	0.886285	0.113715	1	0.471201	87	13
978	0.886303	0.113697	1	0.470411	87	14
979	0.886413	0.113587	1	0.465442	87	15
980	0.886422	0.113578	1	0.465058	87	14
981	0.886674	0.113326	1	0.45372	87	13
982	0.886681	0.113319	1	0.453377	87	13
983	0.886727	0.113273	1	0.451315	87	13
984	0.886755	0.113245	1	0.45007	87	12
985	0.886807	0.113193	1	0.447706	87	12
986	0.886811	0.113189	1	0.447542	87	12
987	0.88687	0.11313	1	0.444899	87	13
988	0.88688	0.11312	1	0.444453	87	12
989	0.886922	0.113078	1	0.442533	87	13
990	0.88693	0.11307	1	0.442162	87	12
991	0.886944	0.113056	1	0.441566	87	13
992	0.886966	0.113034	1	0.440564	87	14
993	0.886967	0.113033	1	0.440504	87	14
994	0.886994	0.113006	1	0.439304	87	13
995	0.887002	0.112998	1	0.438941	87	12
996	0.887036	0.112964	1	0.437436	87	12
997	0.887064	0.112936	1	0.436177	87	12
998	0.887064	0.112936	1	0.436144	87	12
999	0.887136	0.112864	1	0.43291	87	11
1000	0.887188	0.112812	1	0.430563	87	10
1001	0.887197	0.112803	1	0.430157	87	9
1002	0.887408	0.112592	1	0.420659	87	8
1003	0.887506	0.112494	1	0.416245	87	8
1004	0.887619	0.112381	1	0.411181	87	7
1005	0.889042	0.110958	1	0.347147	87	6
1006	0.889096	0.110904	1	0.344708	87	6
1007	0.88914	0.11086	1	0.342714	87	5
1008	0.889209	0.110791	1	0.339649	87	4
1009	0.889217	0.110783	1	0.339274	87	5
1010	0.88929	0.11071	1	0.336002	87	4
1011	0.889602	0.110398	1	0.321945	87	4
1012	0.889739	0.110261	1	0.315801	87	4
1013	0.889772	0.110228	1	0.314278	87	3
1014	0.89001	0.10999	1	0.303565	87	4
1015	0.890162	0.109838	1	0.296753	87	5
1016	0.890265	0.109735	1	0.29211	87	4
1017	0.890436	0.109564	1	0.284436	87	4
1018	0.890517	0.109483	1	0.280764	87	4
1019	0.890747	0.109253	1	0.270397	87	4
1020	0.890885	0.109115	1	0.264213	87	3
1021	0.891192	0.108808	1	0.250392	87	2
1022	0.891214	0.108786	1	0.249396	87	1
1023	0.891239	0.108761	1	0.248262	87	1
1024	0.891263	0.108737	1	0.247186	87	2
1025	0.891265	0.108735	1	0.247123	87	1
1026	0.891265	0.108735	1	0.247123	87	0
1027	0.891452	0.108548	1	0.991577	88	1
1028	0.891474	0.108526	1	0.990585	88	2
1029	0.891718	0.108282	1	0.979622	88	1
1030	0.891721	0.108279	1	0.979473	88	2
1031	0.895713	0.104287	1	0.799824	88	3
1032	0.899621	0.100379	1	0.623962	88	3
1033	0.900044	0.0999559	1	0.604928	88	4
1034	0.900709	0.0992912	1	0.575015	88	3
1035	0.900728	0.0992721	1	0.574157	88	2
1036	0.900845	0.0991554	1	0.568903	88	3
1037	0.900848	0.0991516	1	0.568735	88	2
1038	0.901935	0.098065	1	0.519837	88	3
1039	0.902417	0.0975833	1	0.49816	88	4
1040	0.902423	0.097577	1	0.497875	88	5
1041	0.902871	0.0971287	1	0.477705	88	6
1042	0.902897	0.0971028	1	0.476536	88	6
1043	0.902944	0.0970559	1	0.474425	88	7
1044	0.902955	0.0970454	1	0.473954	88	8
1045	0.90486	0.0951405	1	0.388233	88	7
1046	0.904995	0.0950052	1	0.382145	88	7
1047	0.906675	0.0933252	1	0.306544	88	6
1048	0.906675	0.0933248	1	0.306529	88	5
1049	0.907034	0.0929655	1	0.290359	88	4
1050	0.907704	0.0922958	1	0.260224	88	4
1051	0.908427	0.0915732	1	0.227703	88	3
1052	0.908433	0.0915674	1	0.227445	88	2
1053	0.908449	0.0915509	1	0.226704	88	1
1054	0.908832	0.0911678	1	0.20946	88	1
1055	0.909383	0.0906172	1	0.184687	88	1
1056	0.909383	0.0906172	1	0.184687	88	0
1057	0.909599	0.0904006	1	0.99025	89	1
1058	0.909599	0.0904006	1	0.99025	89	0
1059	0.909738	0.0902624	1	0.993784	90	1
1060	0.909788	0.0902115	1	0.991492	90	2
1061	0.911066	0.0889338	1	0.933995	90	3
1062	0.911094	0.0889058	1	0.932736	90	2
1063	0.911147	0.088853	1	0.930359	90	2
1064	0.913376	0.0866239	1	0.830048	90	1
1065	0.91338	0.0866202	1	0.829882	90	2
1066	0.913425	0.0865748	1	0.827842	90	2
1067	0.913744	0.0862558	1	0.813487	90	1
1068	0.913791	0.0862087	1	0.811367	90	2
1069	0.9143	0.0857001	1	0.788481	90	3
1070	0.91463	0.08537	1	0.773626	90	2
1071	0.914677	0.0853229	1	0.771505	90	3
1072	0.914892	0.0851077	1	0.761822	90	4
1073	0.915049	0.0849505	1	0.754748	90	5
1074	0.915673	0.0843273	1	0.726703	90	6
1075	0.916056	0.0839438	1	0.709447	90	6
1076	0.916059	0.0839414	1	0.709339	90	7
1077	0.91658	0.0834198	1	0.685868	90	6
1078	0.916636	0.083364	1	0.683357	90	6
1079	0.916802	0.0831978	1	0.675874	90	5
1080	0.917011	0.0829889	1	0.666473	90	4
1081	0.91704	0.0829596	1	0.665157	90	4
1082	0.917176	0.0828238	1	0.659045	90	4
1083	0.917302	0.082698	1	0.653385	90	4
1084	0.917457	0.0825428	1	0.646399	90	3
1085	0.917462	0.0825385	1	0.646206	90	2
1086	0.917463	0.0825371	1	0.646143	90	2
1087	0.917724	0.0822757	1	0.63438	90	3
1088	0.917771	0.0822289	1	0.632277	90	4
1089	0.919436	0.0805643	1	0.557366	90	3
1090	0.919498	0.0805018	1	0.554557	90	4
1091	0.919677	0.0803233	1	0.546524	90	5
1092	0.919885	0.0801154	1	0.537169	90	5
1093	0.919928	0.0800719	1	0.535208	90	6
1094	0.919937	0.0800628	1	0.534799	90	7
1095	0.920629	0.079371	1	0.503667	90	6
1096	0.92074	0.0792604	1	0.498694	90	6
1097	0.920828	0.079172	1	0.494713	90	6
1098	0.92108	0.0789203	1	0.483386	90	5
1099	0.921149	0.0788506	1	0.480252	90	4
1100	0.921234	0.0787656	1	0.476427	90	5
1101	0.921265	0.0787345	1	0.475028	90	5
1102	0.921472	0.0785284	1	0.465751	90	6
1103	0.921495	0.0785051	1	0.464703	90	7
1104	0.921505	0.078495	1	0.464251	90	7
1105	0.921506	0.078494	1	0.464206	90	6
1106	0.921526	0.0784736	1	0.463288	90	6
1107	0.921544	0.0784559	1	0.462491	90	5
1108	0.921569	0.0784309	1	0.461364	90	5
1109	0.92161	0.0783901	1	0.459528	90	6
1110	0.921612	0.0783877	1	0.459423	90	7
1111	0.921689	0.0783111	1	0.455976	90	8
1112	0.922051	0.0779486	1	0.439662	90	8
1113	0.92206	0.07794	1	0.439274	90	7
1114	0.922417	0.0775826	1	0.423191	90	8
1115	0.922439	0.0775615	1	0.42224	90	7
1116	0.92245	0.0775496	1	0.421707	90	6
1117	0.922451	0.0775486	1	0.421663	90	7
1118	0.922453	0.0775468	1	0.421578	90	6
1119	0.922475	0.0775247	1	0.420588	90	6
1120	0.922503	0.0774968	1	0.419329	90	5
1121	0.922524	0.0774755	1	0.418373	90	4
1122	0.922745	0.077255	1	0.408449	90	3
1123	0.92275	0.0772501	1	0.408227	90	2
1124	0.922986	0.0770139	1	0.397599	90	1
1125	0.923072	0.0769284	1	0.393753	90	1
1126	0.923073	0.0769273	1	0.393704	90	1
1127	0.923073	0.0769273	1	0.393704	90	0
1128	0.923074	0.0769261	1	0.999945	91	1
1129	0.923328	0.0766715	1	0.988489	91	2
1130	0.923986	0.0760145	1	0.958921	91	3
1131	0.923994	0.076006	1	0.958542	91	4
1132	0.924833	0.0751668	1	0.920778	91	3
1133	0.92485	0.0751499	1	0.920016	91	2
1134	0.924879	0.0751214	1	0.918732	91	1
1135	0.924879	0.0751214	1	0.918732	91	0
1136	0.924963	0.075037	1	0.996203	92	1
1137	0.925005	0.0749951	1	0.99432	92	1
1138	0.925006	0.0749938	1	0.994257	92	1
1139	0.925006	0.0749938	1	0.994257	92	0
1140	0.925047	0.0749528	1	0.998157	93	1
1141	0.92517	0.0748305	1	0.992652	93	2
1142	0.925306	0.074694	1	0.986513	93	3
1143	0.925308	0.0746918	1	0.986411	93	3
1144	0.925811	0.0741891	1	0.963788	93	2
1145	0.925817	0.0741831	1	0.963521	93	3
1146	0.925902	0.0740982	1	0.959698	93	2
1147	0.92592	0.0740801	1	0.958886	93	1
1148	0.925984	0.0740162	1	0.956009	93	1
1149	0.926022	0.0739782	1	0.954301	93	2
1150	0.926066	0.073934	1	0.952309	93	2
1151	0.926071	0.0739293	1	0.952098	93	3
1152	0.926131	0.0738694	1	0.949402	93	3
1153	0.926138	0.073862	1	0.949071	93	3
1154	0.926268	0.0737324	1	0.943239	93	4
1155	0.926641	0.073359	1	0.926435	93	4
1156	0.926645	0.0733547	1	0.926244	93	5
1157	0.926663	0.0733367	1	0.92543	93	4
1158	0.926666	0.073334	1	0.925312	93	5
1159	0.927022	0.0729779	1	0.909287	93	6
1160	0.927024	0.0729759	1	0.909194	93	5
1161	0.927119	0.0728807	1	0.904912	93	4
1162	0.927119	0.0728807	1	0.904911	93	5
1163	0.927305	0.0726951	1	0.896562	93	6
1164	0.927326	0.0726743	1	0.895626	93	7
1165	0.927329	0.0726708	1	0.895469	93	8
1166	0.92736	0.07264	1	0.894082	93	7
1167	0.927362	0.0726383	1	0.894004	93	8
1168	0.927433	0.0725668	1	0.890789	93	9
1169	0.927437	0.0725625	1	0.890594	93	8
1170	0.927478	0.0725218	1	0.888761	93	7
1171	0.927549	0.072451	1	0.885575	93	6
1172	0.928324	0.0716761	1	0.850704	93	6
1173	0.928495	0.0715047	1	0.842994	93	6
1174	0.928526	0.0714743	1	0.841625	93	7
1175	0.928558	0.0714425	1	0.840193	93	7
1176	0.928592	0.071408	1	0.838639	93	6
1177	0.92865	0.0713501	1	0.836037	93	7
1178	0.92865	0.0713499	1	0.836026	93	8
1179	0.928659	0.0713411	1	0.835631	93	7
1180	0.928659	0.0713407	1	0.835614	93	8
1181	0.928809	0.0711907	1	0.828861	93	9
1182	0.92881	0.0711897	1	0.828818	93	8
1183	0.928838	0.0711619	1	0.827566	93	9
1184	0.931552	0.0684483	1	0.705454	93	10
1185	0.931601	0.0683985	1	0.703214	93	10
1186	0.932051	0.0679488	1	0.682975	93	10
1187	0.932188	0.067812	1	0.676822	93	9
1188	0.932572	0.0674277	1	0.659527	93	10
1189	0.932595	0.0674052	1	0.658515	93	9
1190	0.932742	0.0672584	1	0.651911	93	9
1191	0.932762	0.0672381	1	0.650997	93	10
1192	0.933441	0.0665585	1	0.620414	93	10
1193	0.933509	0.0664906	1	0.617357	93	10
1194	0.933579	0.0664209	1	0.614222	93	9
1195	0.933905	0.066095	1	0.599558	93	10
1196	0.93391	0.0660899	1	0.599324	93	11
1197	0.933951	0.0660494	1	0.597505	93	12
1198	0.934064	0.0659362	1	0.59241	93	13
1199	0.93429	0.0657099	1	0.582226	93	14
1200	0.934424	0.065576	1	0.576202	93	14
1201	0.935096	0.0649037	1	0.545946	93	13
1202	0.935172	0.0648279	1	0.542537	93	12
1203	0.935246	0.0647542	1	0.539218	93	12
1204	0.935249	0.0647513	1	0.539088	93	11
1205	0.935289	0.0647114	1	0.537296	93	12
1206	0.935394	0.0646064	1	0.532568	93	13
1207	0.935574	0.0644262	1	0.524459	93	14
1208	0.935701	0.0642994	1	0.518754	93	14
1209	0.93574	0.0642598	1	0.51697	93	13
1210	0.93575	0.0642501	1	0.516537	93	13
1211	0.9358	0.0642004	1	0.5143	93	12
1212	0.935887	0.0641127	1	0.510353	93	13
1213	0.935914	0.064086	1	0.509149	93	13
1214	0.936756	0.0632445	1	0.471282	93	14
1215	0.936759	0.0632412	1	0.471136	93	15
1216	0.936778	0.0632217	1	0.470255	93	15
1217	0.936787	0.0632129	1	0.469863	93	15
1218	0.936796	0.0632038	1	0.46945	93	15
1219	0.940247	0.0597531	1	0.314169	93	16
1220	0.940249	0.0597513	1	0.314089	93	17
1221	0.940403	0.0595967	1	0.307133	93	16
1222	0.940424	0.0595759	1	0.306197	93	17
1223	0.940671	0.0593289	1	0.295079	93	16
1224	0.941513	0.0584867	1	0.257182	93	16
1225	0.941534	0.0584665	1	0.256273	93	15
1226	0.941615	0.0583852	1	0.252615	93	14
1227	0.941656	0.0583439	1	0.250757	93	14
1228	0.941692	0.058308	1	0.249139	93	13
1229	0.941723	0.0582768	1	0.247739	93	13
1230	0.941753	0.0582471	1	0.246399	93	12
1231	0.941754	0.0582455	1	0.246329	93	11
1232	0.941756	0.0582443	1	0.246274	93	12
1233	0.941766	0.0582343	1	0.245824	93	11
1234	0.941777	0.0582229	1	0.245309	93	11
1235	0.941793	0.0582066	1	0.244576	93	12
1236	0.941794	0.0582064	1	0.244569	93	11
1237	0.941794	0.058206	1	0.244552	93	11
1238	0.941794	0.058206	1	0.24455	93	11
1239	0.941799	0.0582006	1	0.244309	93	11
1240	0.942564	0.0574358	1	0.209892	93	10
1241	0.942587	0.0574133	1	0.208878	93	9
1242	0.942672	0.0573277	1	0.205026	93	9
1243	0.942681	0.0573194	1	0.204655	93	9
1244	0.942695	0.0573046	1	0.203988	93	9
1245	0.942697	0.0573027	1	0.203903	93	8
1246	0.942704	0.0572956	1	0.203584	93	9
1247	0.942707	0.0572935	1	0.203488	93	8
1248	0.942707	0.0572932	1	0.203477	93	8
1249	0.942747	0.0572532	1	0.201676	93	7
1250	0.942911	0.0570887	1	0.194274	93	6
1251	0.942911	0.0570886	1	0.194268	93	5
1252	0.942912	0.0570883	1	0.194256	93	5
1253	0.942925	0.0570749	1	0.19365	93	6
1254	0.942926	0.0570744	1	0.193631	93	5
1255	0.942928	0.0570719	1	0.193517	93	4
1256	0.942941	0.0570593	1	0.19295	93	3
1257	0.943947	0.0560531	1	0.147669	93	2
1258	0.943964	0.0560355	1	0.14688	93	2
1259	0.943971	0.0560293	1	0.146601	93	2
1260	0.944026	0.0559737	1	0.144095	93	3
1261	0.944045	0.0559547	1	0.143243	93	2
1262	0.94413	0.0558698	1	0.139424	93	1
1263	0.94413	0.0558698	1	0.139424	93	0
1264	0.944238	0.0557624	1	0.995166	94	1
1265	0.94426	0.0557403	1	0.994171	94	2
1266	0.94426	0.0557396	1	0.99414	94	3
1267	0.944261	0.0557386	1	0.994092	94	3
1268	0.944262	0.0557384	1	0.994086	94	3
1269	0.944281	0.0557189	1	0.99321	94	4
1270	0.944281	0.0557187	1	0.993199	94	3
1271	0.944285	0.0557149	1	0.993027	94	4
1272	0.944285	0.0557148	1	0.993022	94	5
1273	0.944285	0.0557146	1	0.993016	94	5
1274	0.944285	0.0557146	1	0.993016	94	5
1275	0.944391	0.0556094	1	0.988279	94	6
1276	0.944403	0.0555975	1	0.987743	94	7
1277	0.944412	0.0555881	1	0.987321	94	6
1278	0.944566	0.0554339	1	0.980383	94	7
1279	0.94457	0.0554297	1	0.980195	94	8
1280	0.944606	0.0553943	1	0.978603	94	8
1281	0.944702	0.0552984	1	0.974285	94	7
1282	0.94478	0.0552205	1	0.970778	94	8
1283	0.945397	0.0546033	1	0.943006	94	9
1284	0.945515	0.0544845	1	0.937661	94	10
1285	0.945865	0.0541355	1	0.921954	94	10
1286	0.946281	0.0537188	1	0.903202	94	9
1287	0.946343	0.0536565	1	0.900401	94	8
1288	0.946463	0.0535374	1	0.895038	94	9
1289	0.946473	0.0535274	1	0.89459	94	9
1290	0.946515	0.0534855	1	0.892703	94	8
1291	0.94664	0.0533596	1	0.887038	94	9
1292	0.946698	0.0533019	1	0.884441	94	10
1293	0.946698	0.0533016	1	0.884429	94	11
1294	0.946701	0.0532987	1	0.884301	94	12
1295	0.946701	0.0532986	1	0.884295	94	11
1296	0.946708	0.0532922	1	0.884005	94	10
1297	0.94671	0.05329	1	0.883908	94	11
1298	0.946724	0.0532759	1	0.883272	94	12
1299	0.946725	0.0532751	1	0.883235	94	13
1300	0.946725	0.0532747	1	0.88322	94	13
1301	0.946728	0.0532724	1	0.883116	94	14
1302	0.946792	0.0532085	1	0.880239	94	15
1303	0.946893	0.0531069	1	0.875666	94	14
1304	0.946916	0.0530841	1	0.874643	94	14
1305	0.946916	0.0530841	1	0.874643	94	14
1306	0.947154	0.0528457	1	0.863912	94	15
1307	0.947155	0.0528452	1	0.863892	94	14
1308	0.947159	0.052841	1	0.863702	94	13
1309	0.947163	0.0528367	1	0.86351	94	12
1310	0.94718	0.0528204	1	0.862777	94	13
1311	0.94718	0.0528203	1	0.86277	94	14
1312	0.947185	0.0528148	1	0.862525	94	15
1313	0.947185	0.0528148	1	0.862522	94	14
1314	0.947203	0.0527966	1	0.861706	94	13
1315	0.947401	0.0525987	1	0.8528	94	12
1316	0.947403	0.0525971	1	0.852728	94	11
1317	0.947437	0.0525628	1	0.851183	94	10
1318	0.947451	0.0525493	1	0.850578	94	10
1319	0.947455	0.0525452	1	0.850393	94	11
1320	0.947456	0.0525437	1	0.850323	94	11
1321	0.947498	0.0525017	1	0.848434	94	12
1322	0.947499	0.052501	1	0.848404	94	11
1323	0.947572	0.0524283	1	0.84513	94	10
1324	0.947574	0.0524259	1	0.845025	94	10
1325	0.947574	0.0524258	1	0.845018	94	11
1326	0.947589	0.0524106	1	0.844333	94	12
1327	0.947589	0.0524105	1	0.844331	94	11
1328	0.947613	0.0523866	1	0.843253	94	10
1329	0.947898	0.0521016	1	0.83043	94	9
1330	0.947901	0.0520994	1	0.83033	94	10
1331	0.947901	0.0520993	1	0.830325	94	11
1332	0.947913	0.0520865	1	0.829751	94	12
1333	0.947914	0.0520863	1	0.829742	94	11
1334	0.947914	0.052086	1	0.829727	94	12
1335	0.948008	0.0519925	1	0.825518	94	12
1336	0.948012	0.0519885	1	0.825339	94	12
1337	0.948012	0.0519884	1	0.825337	94	11
1338	0.948023	0.0519772	1	0.82483	94	12
1339	0.948028	0.0519723	1	0.824611	94	13
1340	0.948036	0.0519638	1	0.824227	94	13
1341	0.948039	0.0519606	1	0.824084	94	12
1342	0.948042	0.051958	1	0.823969	94	13
1343	0.948043	0.0519566	1	0.823903	94	12
1344	0.948047	0.0519529	1	0.823737	94	13
1345	0.948047	0.0519528	1	0.823734	94	14
1346	0.948047	0.0519527	1	0.82373	94	14
1347	0.948053	0.0519469	1	0.823469	94	13
1348	0.948055	0.0519449	1	0.823379	94	12
1349	0.948055	0.0519448	1	0.823375	94	13
1350	0.948055	0.0519448	1	0.823374	94	14
1351	0.94836	0.0516403	1	0.809671	94	15
1352	0.948449	0.0515506	1	0.805635	94	15
1353	0.948449	0.0515506	1	0.805632	94	14
1354	0.948449	0.0515505	1	0.805631	94	13
1355	0.94845	0.0515503	1	0.805623	94	14
1356	0.94845	0.0515502	1	0.805615	94	13
1357	0.94845	0.0515499	1	0.805603	94	14
1358	0.94845	0.0515498	1	0.805598	94	14
1359	0.948451	0.0515492	1	0.80557	94	13
1360	0.948451	0.0515491	1	0.805568	94	14
1361	0.948452	0.051548	1	0.805517	94	13
1362	0.948452	0.0515479	1	0.805514	94	14
1363	0.948453	0.0515473	1	0.805486	94	13
1364	0.948454	0.051546	1	0.805425	94	12
1365	0.948455	0.0515451	1	0.805387	94	13
1366	0.948455	0.0515451	1	0.805385	94	14
1367	0.948455	0.0515451	1	0.805385	94	14
1368	0.948457	0.0515427	1	0.805279	94	13
1369	0.948459	0.0515407	1	0.805188	94	12
1370	0.948459	0.0515407	1	0.805187	94	11
1371	0.948459	0.0515407	1	0.805187	94	11
1372	0.948459	0.0515406	1	0.805185	94	11
1373	0.948461	0.0515393	1	0.805125	94	12
1374	0.948461	0.0515391	1	0.805118	94	13
1375	0.948461	0.0515391	1	0.805116	94	14
1376	0.948461	0.0515391	1	0.805116	94	14
1377	0.948955	0.0510455	1	0.782903	94	15
1378	0.949161	0.0508392	1	0.773622	94	15
1379	0.949161	0.0508391	1	0.773617	94	14
1380	0.949161	0.050839	1	0.773614	94	14
1381	0.949164	0.0508357	1	0.773462	94	15
1382	0.949229	0.0507706	1	0.770534	94	16
1383	0.94975	0.0502501	1	0.747111	94	16
1384	0.949759	0.0502414	1	0.74672	94	17
1385	0.949851	0.0501492	1	0.74257	94	16
1386	0.950011	0.0499888	1	0.735353	94	17
1387	0.950013	0.0499868	1	0.735265	94	18
1388	0.950032	0.0499678	1	0.734406	94	19
1389	0.950049	0.0499511	1	0.733658	94	19
1390	0.950049	0.0499506	1	0.733637	94	18
1391	0.95005	0.0499495	1	0.733586	94	19
1392	0.950054	0.0499455	1	0.733406	94	18
1393	0.950075	0.0499247	1	0.732469	94	19
1394	0.950086	0.0499138	1	0.731978	94	18
1395	0.950105	0.0498949	1	0.731127	94	19
1396	0.950108	0.0498919	1	0.730994	94	18
1397	0.9503	0.0496997	1	0.722343	94	17
1398	0.950358	0.0496422	1	0.719755	94	16
1399	0.950504	0.0494955	1	0.713156	94	15
1400	0.950504	0.0494955	1	0.713155	94	14
1401	0.950505	0.0494946	1	0.713112	94	13
1402	0.950505	0.0494946	1	0.713112	94	14
1403	0.95054	0.0494598	1	0.711549	94	15
1404	0.950561	0.0494388	1	0.710605	94	15
1405	0.950674	0.0493264	1	0.705545	94	15
1406	0.950674	0.0493264	1	0.705545	94	14
1407	0.950674	0.0493263	1	0.70554	94	13
1408	0.950674	0.0493263	1	0.70554	94	14
1409	0.950674	0.0493263	1	0.70554	94	13
1410	0.950674	0.0493263	1	0.70554	94	14
1411	0.950674	0.0493263	1	0.70554	94	14
1412	0.950674	0.0493263	1	0.70554	94	14
1413	0.950674	0.0493262	1	0.705535	94	13
1414	0.950674	0.049326	1	0.705526	94	13
1415	0.950675	0.0493254	1	0.7055	94	12
1416	0.950675	0.0493254	1	0.7055	94	13
1417	0.950678	0.0493216	1	0.705329	94	12
1418	0.950678	0.0493216	1	0.705328	94	11
1419	0.95068	0.0493198	1	0.705248	94	12
1420	0.95068	0.0493198	1	0.705247	94	13
1421	0.95068	0.0493196	1	0.705242	94	13
1422	0.95068	0.0493196	1	0.705241	94	14
1423	0.950742	0.0492582	1	0.702475	94	15
1424	0.950742	0.0492582	1	0.702475	94	14
1425	0.950742	0.0492582	1	0.702475	94	14
1426	0.950742	0.0492582	1	0.702475	94	14
1427	0.950752	0.0492477	1	0.702003	94	15
1428	0.950753	0.0492467	1	0.701958	94	16
1429	0.950797	0.0492035	1	0.700014	94	15
1430	0.950841	0.0491586	1	0.697994	94	15
1431	0.950841	0.0491586	1	0.697994	94	14
1432	0.950842	0.0491583	1	0.69798	94	13
1433	0.950842	0.0491583	1	0.69798	94	14
1434	0.950843	0.0491572	1	0.697931	94	15
1435	0.950905	0.0490954	1	0.695151	94	16
1436	0.950909	0.049091	1	0.694955	94	15
1437	0.951191	0.0488093	1	0.682276	94	16
1438	0.951205	0.0487951	1	0.681635	94	15
1439	0.951222	0.0487782	1	0.680877	94	15
1440	0.951222	0.0487782	1	0.680877	94	14
1441	0.951226	0.0487744	1	0.680704	94	15
1442	0.951306	0.0486937	1	0.677075	94	16
1443	0.951311	0.0486887	1	0.67685	94	17
1444	0.951324	0.048676	1	0.676276	94	18
1445	0.951339	0.0486607	1	0.675589	94	19
1446	0.951349	0.0486509	1	0.675147	94	20
1447	0.951719	0.0482808	1	0.658494	94	21
1448	0.952735	0.0472647	1	0.612771	94	22
1449	0.952759	0.0472409	1	0.611697	94	21
1450	0.953488	0.0465116	1	0.578878	94	22
1451	0.953521	0.0464791	1	0.577417	94	21
1452	0.95381	0.0461904	1	0.564423	94	21
1453	0.953963	0.0460371	1	0.557527	94	22
1454	0.953972	0.0460279	1	0.557112	94	23
1455	0.953975	0.0460252	1	0.55699	94	24
1456	0.958023	0.0419769	1	0.374816	94	23
1457	0.958325	0.041675	1	0.361235	94	22
1458	0.958371	0.0416286	1	0.359142	94	22
1459	0.95838	0.0416203	1	0.35877	94	22
1460	0.95869	0.0413102	1	0.344816	94	23
1461	0.958695	0.0413055	1	0.344604	94	24
1462	0.959229	0.0407706	1	0.320533	94	23
1463	0.959399	0.0406012	1	0.312913	94	22
1464	0.959423	0.0405767	1	0.31181	94	22
1465	0.959699	0.0403007	1	0.299391	94	23
1466	0.959753	0.0402474	1	0.296989	94	22
1467	0.95979	0.0402102	1	0.295315	94	21
1468	0.959921	0.0400787	1	0.289398	94	20
1469	0.959984	0.0400155	1	0.286556	94	20
1470	0.960013	0.0399868	1	0.285262	94	19
1471	0.960034	0.039966	1	0.284325	94	19
1472	0.960043	0.0399573	1	0.283935	94	18
1473	0.960248	0.0397517	1	0.274685	94	17
1474	0.960406	0.0395942	1	0.267596	94	16
1475	0.960412	0.0395878	1	0.267307	94	16
1476	0.960416	0.0395842	1	0.267148	94	15
1477	0.960416	0.0395842	1	0.267147	94	14
1478	0.960416	0.0395842	1	0.267146	94	13
1479	0.960417	0.0395827	1	0.267079	94	12
1480	0.960418	0.039582	1	0.267047	94	12
1481	0.96042	0.0395796	1	0.266939	94	12
1482	0.96042	0.0395796	1	0.266939	94	13
1483	0.96042	0.0395796	1	0.266939	94	13
1484	0.96042	0.0395796	1	0.266939	94	14
1485	0.96042	0.0395796	1	0.266938	94	13
1486	0.960421	0.0395793	1	0.266927	94	12
1487	0.960421	0.0395793	1	0.266925	94	11
1488	0.960421	0.0395793	1	0.266925	94	11
1489	0.960427	0.0395731	1	0.266648	94	10
1490	0.960493	0.0395073	1	0.263688	94	9
1491	0.960495	0.0395055	1	0.263603	94	10
1492	0.960495	0.0395054	1	0.263603	94	11
1493	0.960495	0.0395054	1	0.263602	94	12
1494	0.960495	0.0395054	1	0.2636	94	11
1495	0.960573	0.0394274	1	0.26009	94	10
1496	0.960574	0.0394261	1	0.26003	94	10
1497	0.960765	0.0392347	1	0.251421	94	9
1498	0.960788	0.0392115	1	0.250377	94	8
1499	0.960802	0.0391982	1	0.249779	94	7
1500	0.960853	0.0391474	1	0.247491	94	7
1501	0.960925	0.0390748	1	0.244222	94	6
1502	0.961157	0.0388427	1	0.23378	94	6
1503	0.961158	0.0388421	1	0.23375	94	5
1504	0.961474	0.0385262	1	0.219535	94	6
1505	0.961474	0.0385261	1	0.219533	94	5
1506	0.961474	0.038526	1	0.219529	94	4
1507	0.961474	0.0385257	1	0.219515	94	5
1508	0.961475	0.0385249	1	0.219479	94	4
1509	0.961475	0.0385246	1	0.219463	94	3
1510	0.961477	0.0385232	1	0.219399	94	2
1511	0.961495	0.0385054	1	0.2186	94	2
1512	0.961823	0.0381769	1	0.203819	94	1
1513	0.961873	0.038127	1	0.201574	94	1
1514	0.961874	0.0381255	1	0.201506	94	2
1515	0.96261	0.0373899	1	0.168402	94	1
1516	0.96261	0.0373899	1	0.168402	94	0
1517	0.962618	0.0373816	1	0.999628	95	1
1518	0.962655	0.0373455	1	0.998001	95	2
1519	0.96284	0.0371603	1	0.989669	95	3
1520	0.96284	0.0371599	1	0.98965	95	2
1521	0.962935	0.0370648	1	0.985371	95	2
1522	0.96297	0.03703	1	0.983806	95	2
1523	0.962976	0.0370245	1	0.983558	95	3
1524	0.962996	0.0370037	1	0.982622	95	3
1525	0.962996	0.0370036	1	0.982619	95	4
1526	0.962996	0.0370035	1	0.982614	95	4
1527	0.963921	0.0360793	1	0.941025	95	5
1528	0.964167	0.0358332	1	0.92995	95	5
1529	0.96417	0.0358298	1	0.929797	95	6
1530	0.964171	0.035829	1	0.929761	95	7
1531	0.964171	0.0358289	1	0.929757	95	7
1532	0.964182	0.0358176	1	0.929249	95	6
1533	0.96419	0.0358101	1	0.92891	95	6
1534	0.964191	0.0358092	1	0.928868	95	7
1535	0.964237	0.0357625	1	0.926769	95	8
1536	0.964238	0.0357623	1	0.926761	95	7
1537	0.964259	0.0357413	1	0.925815	95	6
1538	0.964259	0.0357413	1	0.925814	95	7
1539	0.964263	0.0357371	1	0.925626	95	8
1540	0.964274	0.0357261	1	0.925128	95	9
1541	0.964308	0.0356917	1	0.92358	95	8
1542	0.964346	0.0356536	1	0.921868	95	8
1543	0.964354	0.0356459	1	0.921522	95	8
1544	0.964436	0.0355642	1	0.917846	95	9
1545	0.964438	0.0355624	1	0.917763	95	9
1546	0.964444	0.0355562	1	0.917485	95	8
1547	0.964474	0.0355259	1	0.916121	95	9
1548	0.964475	0.0355251	1	0.916086	95	10
1549	0.964497	0.0355034	1	0.915108	95	11
1550	0.96451	0.0354903	1	0.914518	95	12
1551	0.964666	0.0353337	1	0.90747	95	11
1552	0.964674	0.0353258	1	0.907117	95	12
1553	0.964835	0.0351652	1	0.899891	95	11
1554	0.964838	0.0351617	1	0.899734	95	11
1555	0.964838	0.0351616	1	0.899727	95	10
1556	0.964844	0.0351563	1	0.899489	95	11
1557	0.964847	0.0351527	1	0.899325	95	12
1558	0.964849	0.0351511	1	0.899256	95	13
1559	0.964855	0.0351448	1	0.898971	95	12
1560	0.964856	0.0351443	1	0.898948	95	13
1561	0.964857	0.0351428	1	0.898881	95	12
1562	0.964899	0.0351013	1	0.897015	95	11
1563	0.964901	0.0350994	1	0.896928	95	10
1564	0.964929	0.0350713	1	0.895663	95	9
1565	0.964943	0.0350569	1	0.895014	95	9
1566	0.964943	0.0350567	1	0.895008	95	10
1567	0.964947	0.0350531	1	0.894844	95	11
1568	0.964957	0.0350432	1	0.894401	95	11
1569	0.964957	0.035043	1	0.894392	95	12
1570	0.964961	0.0350391	1	0.894213	95	11
1571	0.964961	0.0350385	1	0.894189	95	12
1572	0.964963	0.0350373	1	0.894132	95	12
1573	0.964969	0.0350313	1	0.893866	95	11
1574	0.96497	0.0350303	1	0.89382	95	10
1575	0.964971	0.0350287	1	0.893746	95	9
1576	0.964983	0.0350172	1	0.89323	95	10
1577	0.964985	0.0350152	1	0.893138	95	9
1578	0.964989	0.0350114	1	0.892969	95	10
1579	0.964995	0.0350046	1	0.892662	95	10
1580	0.964998	0.0350025	1	0.892567	95	10
1581	0.965	0.0350004	1	0.892473	95	10
1582	0.965016	0.0349839	1	0.891729	95	11
1583	0.965018	0.0349816	1	0.89163	95	12
1584	0.965028	0.0349724	1	0.891214	95	11
1585	0.965029	0.0349714	1	0.891169	95	10
1586	0.965032	0.0349678	1	0.891007	95	11
1587	0.965032	0.0349676	1	0.890998	95	12
1588	0.965033	0.0349667	1	0.890955	95	13
1589	0.965033	0.0349667	1	0.890955	95	14
1590	0.965034	0.0349661	1	0.890932	95	13
1591	0.965034	0.0349661	1	0.890932	95	14
1592	0.965042	0.0349576	1	0.890549	95	15
1593	0.965042	0.0349576	1	0.890549	95	14
1594	0.965869	0.0341309	1	0.853344	95	15
1595	0.966058	0.0339423	1	0.844859	95	15
1596	0.966058	0.0339423	1	0.844859	95	14
1597	0.966059	0.0339413	1	0.844815	95	13
1598	0.966059	0.0339413	1	0.844815	95	14
1599	0.96606	0.0339396	1	0.844736	95	13
1600	0.96606	0.0339396	1	0.844736	95	14
1601	0.96643	0.0335696	1	0.828086	95	15
1602	0.966775	0.0332249	1	0.812575	95	16
1603	0.966775	0.0332248	1	0.81257	95	17
1604	0.966775	0.0332247	1	0.812568	95	17
1605	0.966775	0.0332246	1	0.812563	95	17
1606	0.966784	0.0332156	1	0.812157	95	18
1607	0.966784	0.0332156	1	0.812157	95	19
1608	0.966798	0.0332024	1	0.811565	95	20
1609	0.968522	0.0314784	1	0.733982	95	20
1610	0.968522	0.0314783	1	0.733979	95	19
1611	0.968522	0.0314783	1	0.733978	95	19
1612	0.968531	0.0314692	1	0.733572	95	18
1613	0.968556	0.0314438	1	0.732425	95	18
1614	0.968556	0.0314438	1	0.732425	95	19
1615	0.968556	0.0314438	1	0.732425	95	19
1616	0.96893	0.0310698	1	0.715595	95	20
1617	0.969148	0.0308524	1	0.705812	95	20
1618	0.96915	0.0308501	1	0.705711	95	21
1619	0.969185	0.0308153	1	0.704142	95	22
1620	0.969262	0.0307383	1	0.700678	95	22
1621	0.969276	0.0307245	1	0.700056	95	22
1622	0.969288	0.0307119	1	0.699491	95	21
1623	0.969289	0.0307114	1	0.699467	95	22
1624	0.96929	0.0307104	1	0.699422	95	23
1625	0.969318	0.0306824	1	0.698162	95	23
1626	0.969795	0.0302055	1	0.676701	95	24
1627	0.970094	0.0299063	1	0.66324	95	25
1628	0.970295	0.0297052	1	0.654189	95	26
1629	0.970592	0.0294077	1	0.640801	95	26
1630	0.970665	0.0293353	1	0.637546	95	26
1631	0.970671	0.0293288	1	0.637251	95	27
1632	0.970678	0.0293215	1	0.636924	95	28
1633	0.970791	0.0292093	1	0.631876	95	29
1634	0.970896	0.0291036	1	0.627117	95	30
1635	0.970936	0.0290636	1	0.625319	95	31
1636	0.970936	0.0290636	1	0.625318	95	32
1637	0.970942	0.0290583	1	0.625078	95	31
1638	0.970945	0.0290555	1	0.624953	95	31
1639	0.970945	0.0290555	1	0.624952	95	32
1640	0.970964	0.0290357	1	0.62406	95	33
1641	0.971255	0.0287449	1	0.610977	95	34
1642	0.971275	0.0287253	1	0.610096	95	35
1643	0.971338	0.0286619	1	0.60724	95	36
1644	0.971413	0.0285872	1	0.603878	95	36
1645	0.971431	0.0285689	1	0.603057	95	35
1646	0.971521	0.0284785	1	0.598989	95	34
1647	0.971553	0.0284469	1	0.597565	95	33
1648	0.97162	0.0283798	1	0.594547	95	34
1649	0.971673	0.0283266	1	0.592151	95	35
1650	0.971676	0.0283235	1	0.592014	95	34
1651	0.971691	0.0283091	1	0.591364	95	33
1652	0.971692	0.0283078	1	0.591305	95	34
1653	0.971702	0.0282981	1	0.59087	95	33
1654	0.971702	0.0282977	1	0.590854	95	34
1655	0.971714	0.0282861	1	0.590328	95	35
1656	0.971802	0.0281984	1	0.586383	95	34
1657	0.971834	0.0281664	1	0.584943	95	35
1658	0.97186	0.0281402	1	0.583766	95	35
1659	0.971883	0.0281166	1	0.582701	95	34
1660	0.971902	0.0280981	1	0.581872	95	35
1661	0.971912	0.0280884	1	0.581435	95	36
1662	0.972779	0.0272209	1	0.542396	95	37
1663	0.972791	0.0272089	1	0.541854	95	37
1664	0.97281	0.0271898	1	0.540998	95	36
1665	0.97282	0.0271803	1	0.540571	95	35
1666	0.972862	0.0271384	1	0.538684	95	36
1667	0.972879	0.0271213	1	0.537912	95	37
1668	0.972891	0.0271085	1	0.537339	95	36
1669	0.972905	0.0270949	1	0.536728	95	35
1670	0.972909	0.027091	1	0.536552	95	35
1671	0.972913	0.0270866	1	0.536351	95	36
1672	0.972939	0.0270606	1	0.535182	95	36
1673	0.972982	0.0270179	1	0.53326	95	37
1674	0.972986	0.0270144	1	0.533103	95	37
1675	0.973036	0.026964	1	0.530835	95	38
1676	0.973041	0.0269592	1	0.530619	95	39
1677	0.973135	0.0268646	1	0.526363	95	40
1678	0.973143	0.0268567	1	0.526007	95	39
1679	0.973178	0.0268216	1	0.524425	95	40
1680	0.97319	0.0268104	1	0.523922	95	39
1681	0.973192	0.0268076	1	0.523796	95	39
1682	0.973548	0.0264518	1	0.507787	95	40
1683	0.973966	0.0260341	1	0.488991	95	41
1684	0.973971	0.0260286	1	0.488745	95	42
1685	0.973986	0.0260136	1	0.488065	95	43
1686	0.974003	0.0259972	1	0.487332	95	42
1687	0.974204	0.025796	1	0.478276	95	41
1688	0.97421	0.0257899	1	0.477999	95	40
1689	0.974223	0.0257766	1	0.477401	95	40
1690	0.974331	0.0256691	1	0.472563	95	41
1691	0.974465	0.0255346	1	0.466511	95	42
1692	0.974504	0.0254964	1	0.464793	95	41
1693	0.974545	0.0254552	1	0.462941	95	42
1694	0.974545	0.0254547	1	0.462919	95	43
1695	0.974549	0.025451	1	0.462752	95	43
1696	0.974551	0.0254494	1	0.46268	95	44
1697	0.974558	0.0254419	1	0.46234	95	45
1698	0.974565	0.0254348	1	0.462024	95	44
1699	0.974566	0.0254337	1	0.461972	95	43
1700	0.974568	0.0254318	1	0.461885	95	43
1701	0.97458	0.0254198	1	0.461345	95	42
1702	0.974783	0.0252174	1	0.452241	95	41
1703	0.974783	0.0252173	1	0.452233	95	42
1704	0.974783	0.0252171	1	0.452225	95	43
1705	0.974784	0.0252163	1	0.452187	95	43
1706	0.97481	0.0251902	1	0.451016	95	42
1707	0.974853	0.0251472	1	0.449079	95	42
1708	0.97486	0.0251405	1	0.448776	95	42
1709	0.974871	0.0251292	1	0.448269	95	42
1710	0.974907	0.025093	1	0.446641	95	41
1711	0.974995	0.0250046	1	0.442664	95	40
1712	0.975005	0.0249949	1	0.442228	95	40
1713	0.975019	0.0249806	1	0.441582	95	39
1714	0.975125	0.0248752	1	0.436841	95	38
1715	0.975152	0.0248479	1	0.435609	95	38
1716	0.975154	0.0248461	1	0.43553	95	39
1717	0.975331	0.0246691	1	0.427565	95	38
1718	0.975379	0.0246213	1	0.425413	95	37
1719	0.975507	0.0244927	1	0.419627	95	37
1720	0.975514	0.0244861	1	0.41933	95	38
1721	0.975516	0.0244836	1	0.419219	95	38
1722	0.97552	0.0244798	1	0.419048	95	39
1723	0.975558	0.0244422	1	0.417353	95	38
1724	0.975735	0.0242653	1	0.409393	95	37
1725	0.975773	0.0242272	1	0.407681	95	36
1726	0.975802	0.0241982	1	0.406373	95	37
1727	0.975989	0.0240114	1	0.397967	95	37
1728	0.975997	0.0240033	1	0.397605	95	36
1729	0.976024	0.0239764	1	0.396393	95	35
1730	0.976026	0.0239737	1	0.396272	95	35
1731	0.976035	0.0239645	1	0.395859	95	34
1732	0.976059	0.0239415	1	0.394822	95	34
1733	0.976063	0.0239375	1	0.394642	95	33
1734	0.976063	0.0239375	1	0.394641	95	32
1735	0.976073	0.0239272	1	0.394181	95	31
1736	0.976079	0.0239207	1	0.393889	95	31
1737	0.976081	0.0239188	1	0.3938	95	31
1738	0.976082	0.0239181	1	0.39377	95	31
1739	0.976204	0.0237959	1	0.388271	95	30
1740	0.976266	0.0237343	1	0.385501	95	30
1741	0.976293	0.0237075	1	0.384292	95	29
1742	0.976306	0.0236941	1	0.383691	95	28
1743	0.976307	0.0236926	1	0.383624	95	28
1744	0.976378	0.0236223	1	0.380459	95	27
1745	0.976451	0.0235487	1	0.377148	95	27
1746	0.976629	0.0233707	1	0.369139	95	26
1747	0.977275	0.0227248	1	0.340073	95	26
1748	0.978177	0.0218234	1	0.299506	95	25
1749	0.978177	0.0218228	1	0.299484	95	25
1750	0.978213	0.0217867	1	0.297855	95	24
1751	0.978216	0.0217842	1	0.297746	95	24
1752	0.978217	0.0217826	1	0.297673	95	25
1753	0.978218	0.0217821	1	0.297652	95	25
1754	0.978331	0.0216692	1	0.292569	95	26
1755	0.978332	0.0216677	1	0.292501	95	25
1756	0.979157	0.0208426	1	0.255372	95	24
1757	0.979336	0.0206636	1	0.247319	95	24
1758	0.979416	0.0205837	1	0.243723	95	23
1759	0.979445	0.020555	1	0.24243	95	23
1760	0.979447	0.0205532	1	0.242351	95	22
1761	0.979455	0.0205448	1	0.241973	95	23
1762	0.979463	0.020537	1	0.241619	95	22
1763	0.979466	0.0205336	1	0.241469	95	21
1764	0.979488	0.0205117	1	0.240482	95	21
1765	0.979491	0.0205089	1	0.240357	95	22
1766	0.97951	0.0204902	1	0.239513	95	23
1767	0.97951	0.0204901	1	0.23951	95	22
1768	0.979519	0.0204815	1	0.239122	95	21
1769	0.979764	0.0202358	1	0.228066	95	20
1770	0.9798	0.0201996	1	0.226438	95	20
1771	0.9798	0.0201996	1	0.226438	95	19
1772	0.9798	0.0201996	1	0.226438	95	19
1773	0.9798	0.0201996	1	0.226438	95	19
1774	0.979832	0.0201684	1	0.225034	95	18
1775	0.979832	0.0201684	1	0.225034	95	19
1776	0.979838	0.0201616	1	0.22473	95	18
1777	0.979842	0.0201583	1	0.224581	95	18
1778	0.979842	0.0201583	1	0.22458	95	17
1779	0.98145	0.0185501	1	0.152208	95	16
1780	0.981456	0.018544	1	0.151934	95	15
1781	0.981456	0.018544	1	0.151934	95	14
1782	0.981456	0.018544	1	0.151934	95	14
1783	0.981457	0.0185425	1	0.151869	95	13
1784	0.981458	0.018542	1	0.151844	95	13
1785	0.981463	0.018537	1	0.151621	95	12
1786	0.981467	0.0185327	1	0.151426	95	11
1787	0.981468	0.0185323	1	0.151408	95	11
1788	0.981493	0.018507	1	0.150272	95	11
1789	0.981493	0.0185066	1	0.15025	95	12
1790	0.981494	0.0185058	1	0.150218	95	13
1791	0.981496	0.0185036	1	0.150118	95	12
1792	0.981506	0.0184941	1	0.149691	95	11
1793	0.981506	0.0184941	1	0.149689	95	10
1794	0.981511	0.0184891	1	0.149467	95	9
1795	0.981512	0.0184885	1	0.149436	95	8
1796	0.981512	0.0184884	1	0.149431	95	7
1797	0.981514	0.0184858	1	0.149317	95	6
1798	0.982554	0.0174461	1	0.102531	95	5
1799	0.983034	0.0169664	1	0.0809454	95	5
1800	0.983877	0.0161232	1	0.0429992	95	5
1801	0.983877	0.0161231	1	0.0429933	95	4
1802	0.983935	0.0160645	1	0.0403601	95	3
1803	0.983978	0.0160216	1	0.0384273	95	3
1804	0.983987	0.0160132	1	0.0380484	95	3
1805	0.983991	0.0160089	1	0.0378555	95	3
1806	0.984037	0.0159632	1	0.0358004	95	2
1807	0.984085	0.0159149	1	0.0336265	95	1
1808	0.984087	0.0159127	1	0.0335253	95	2
1809	0.98409	0.0159104	1	0.0334238	95	2
1810	0.984187	0.0158135	1	0.029062	95	3
1811	0.984197	0.0158034	1	0.0286077	95	2
1812	0.984209	0.0157914	1	0.0280683	95	1
1813	0.984214	0.0157856	1	0.0278057	95	2
1814	0.984215	0.0157852	1	0.0277902	95	1
1815	0.984215	0.0157852	1	0.0277902	95	0
1816	0.984238	0.0157615	1	0.998935	96	1
1817	0.984238	0.0157615	1	0.998935	96	2
1818	0.984239	0.0157615	1	0.998933	96	2
1819	0.984248	0.0157522	1	0.998516	96	1
1820	0.984248	0.0157521	1	0.998511	96	2
1821	0.984248	0.0157521	1	0.99851	96	2
1822	0.984284	0.0157162	1	0.996896	96	3
1823	0.984284	0.0157161	1	0.996891	96	2
1824	0.984312	0.015688	1	0.995628	96	1
1825	0.984312	0.015688	1	0.995624	96	2
1826	0.984312	0.0156879	1	0.995623	96	2
1827	0.984329	0.0156709	1	0.994855	96	3
1828	0.984329	0.0156709	1	0.994855	96	4
1829	0.984368	0.0156319	1	0.993102	96	5
1830	0.984372	0.0156282	1	0.992936	96	6
1831	0.984373	0.0156272	1	0.992888	96	7
1832	0.984386	0.015614	1	0.992297	96	8
1833	0.984411	0.0155891	1	0.991174	96	8
1834	0.984411	0.0155889	1	0.991164	96	8
1835	0.984412	0.0155885	1	0.991147	96	7
1836	0.984417	0.0155826	1	0.990882	96	6
1837	0.984418	0.0155824	1	0.990873	96	7
1838	0.984418	0.0155816	1	0.990839	96	8
1839	0.984419	0.0155814	1	0.990829	96	7
1840	0.984419	0.0155814	1	0.990827	96	7
1841	0.984419	0.0155813	1	0.990822	96	7
1842	0.984438	0.0155623	1	0.98997	96	6
1843	0.984439	0.0155612	1	0.989917	96	6
1844	0.984455	0.0155446	1	0.989174	96	5
1845	0.984459	0.0155409	1	0.989006	96	6
1846	0.984459	0.0155407	1	0.988997	96	7
1847	0.98447	0.0155302	1	0.988525	96	8
1848	0.98447	0.0155302	1	0.988524	96	7
1849	0.98447	0.0155301	1	0.988518	96	8
1850	0.984471	0.0155289	1	0.988466	96	7
1851	0.984471	0.0155288	1	0.988462	96	7
1852	0.984471	0.0155287	1	0.988459	96	7
1853	0.984484	0.0155159	1	0.987883	96	6
1854	0.984484	0.0155159	1	0.987879	96	7
1855	0.984534	0.0154661	1	0.98564	96	6
1856	0.984534	0.0154661	1	0.985638	96	7
1857	0.984545	0.0154548	1	0.98513	96	8
1858	0.984547	0.0154532	1	0.985061	96	9
1859	0.984558	0.0154416	1	0.984538	96	10
1860	0.984559	0.0154413	1	0.984523	96	9
1861	0.984593	0.0154069	1	0.982977	96	10
1862	0.984596	0.0154043	1	0.982858	96	9
1863	0.984596	0.0154038	1	0.982834	96	9
1864	0.984597	0.015403	1	0.982801	96	9
1865	0.984655	0.0153451	1	0.980193	96	10
1866	0.984704	0.0152962	1	0.977994	96	11
1867	0.984732	0.0152676	1	0.976707	96	12
1868	0.984784	0.0152163	1	0.974397	96	12
1869	0.984824	0.0151759	1	0.972579	96	12
1870	0.984824	0.0151756	1	0.972569	96	12
1871	0.984847	0.0151531	1	0.971555	96	12
1872	0.984848	0.0151521	1	0.971508	96	13
1873	0.984855	0.0151449	1	0.971184	96	12
1874	0.984922	0.0150783	1	0.968191	96	11
1875	0.984957	0.0150428	1	0.966592	96	10
1876	0.985082	0.0149177	1	0.960963	96	11
1877	0.985156	0.0148436	1	0.957628	96	11
1878	0.985189	0.0148115	1	0.956182	96	10
1879	0.985191	0.0148091	1	0.956075	96	9
1880	0.985261	0.0147389	1	0.952914	96	10
1881	0.985497	0.0145026	1	0.942281	96	11
1882	0.985538	0.0144616	1	0.940435	96	10
1883	0.985541	0.0144593	1	0.940333	96	9
1884	0.985543	0.0144571	1	0.940237	96	9
1885	0.985543	0.0144568	1	0.940221	96	9
1886	0.985544	0.0144562	1	0.940196	96	9
1887	0.985545	0.014455	1	0.940139	96	9
1888	0.985558	0.0144421	1	0.939559	96	10
1889	0.985562	0.0144382	1	0.939383	96	10
1890	0.985572	0.0144276	1	0.938909	96	10
1891	0.985573	0.014427	1	0.938881	96	9
1892	0.985579	0.0144207	1	0.938598	96	10
1893	0.985642	0.0143576	1	0.935759	96	11
1894	0.985645	0.0143547	1	0.935627	96	12
1895	0.985647	0.0143533	1	0.935562	96	13
1896	0.985665	0.0143345	1	0.934719	96	14
1897	0.985666	0.0143341	1	0.934699	96	15
1898	0.985669	0.0143312	1	0.934568	96	16
1899	0.985669	0.0143305	1	0.934539	96	15
1900	0.985675	0.0143245	1	0.934269	96	14
1901	0.985679	0.0143207	1	0.934095	96	15
1902	0.985687	0.0143125	1	0.93373	96	16
1903	0.985688	0.014312	1	0.933704	96	15
1904	0.985691	0.0143088	1	0.933562	96	16
1905	0.985696	0.0143036	1	0.933327	96	17
1906	0.985735	0.0142646	1	0.931571	96	18
1907	0.985806	0.014194	1	0.928395	96	19
1908	0.985809	0.0141909	1	0.928257	96	19
1909	0.985832	0.014168	1	0.927226	96	19
1910	0.986	0.0140005	1	0.919687	96	20
1911	0.986021	0.0139793	1	0.918732	96	19
1912	0.986022	0.0139781	1	0.918682	96	20
1913	0.986022	0.013978	1	0.918675	96	21
1914	0.986034	0.0139665	1	0.918156	96	20
1915	0.986043	0.0139566	1	0.917711	96	19
1916	0.986095	0.0139049	1	0.915387	96	19
1917	0.986126	0.0138742	1	0.914003	96	20
1918	0.986126	0.0138741	1	0.913998	96	21
1919	0.986131	0.0138689	1	0.913768	96	22
1920	0.986131	0.0138686	1	0.913753	96	21
1921	0.986132	0.013868	1	0.913725	96	21
1922	0.986143	0.0138566	1	0.913215	96	22
1923	0.986146	0.0138545	1	0.913116	96	23
1924	0.986146	0.0138536	1	0.913077	96	22
1925	0.986148	0.013852	1	0.913005	96	23
1926	0.986148	0.013852	1	0.913005	96	24
1927	0.986319	0.0136811	1	0.905317	96	25
1928	0.986319	0.0136811	1	0.905317	96	24
1929	0.986319	0.0136811	1	0.905314	96	23
1930	0.986322	0.013678	1	0.905174	96	22
1931	0.986327	0.0136726	1	0.904931	96	23
1932	0.986327	0.0136726	1	0.904931	96	24
1933	0.986329	0.0136707	1	0.904848	96	23
1934	0.986329	0.0136707	1	0.904847	96	24
1935	0.98654	0.0134596	1	0.895346	96	25
1936	0.98654	0.0134596	1	0.895345	96	24
1937	0.986602	0.0133984	1	0.892594	96	25
1938	0.986602	0.0133984	1	0.892594	96	24
1939	0.986606	0.013394	1	0.892393	96	23
1940	0.986609	0.0133907	1	0.892245	96	22
1941	0.98661	0.0133905	1	0.892237	96	21
1942	0.98661	0.0133904	1	0.892235	96	22
1943	0.986612	0.0133884	1	0.892142	96	23
1944	0.986612	0.0133884	1	0.892142	96	24
1945	0.986614	0.0133856	1	0.892016	96	23
1946	0.986616	0.0133844	1	0.891963	96	22
1947	0.986617	0.0133835	1	0.891921	96	21
1948	0.986618	0.0133815	1	0.891833	96	22
1949	0.986625	0.013375	1	0.891541	96	23
1950	0.986625	0.013375	1	0.891541	96	24
1951	0.986625	0.0133748	1	0.89153	96	23
1952	0.986625	0.0133748	1	0.89153	96	24
1953	0.986625	0.0133748	1	0.89153	96	24
1954	0.986625	0.0133747	1	0.891526	96	23
1955	0.986626	0.0133743	1	0.89151	96	22
1956	0.986626	0.0133737	1	0.89148	96	23
1957	0.986628	0.0133719	1	0.891399	96	22
1958	0.986628	0.0133718	1	0.891398	96	23
1959	0.986629	0.0133706	1	0.891344	96	22
1960	0.986629	0.0133705	1	0.891339	96	23
1961	0.98663	0.0133705	1	0.891338	96	23
1962	0.986632	0.0133681	1	0.891228	96	22
1963	0.986632	0.0133678	1	0.891217	96	23
1964	0.986632	0.0133677	1	0.891214	96	23
1965	0.986632	0.0133677	1	0.891214	96	24
1966	0.986676	0.0133243	1	0.88926	96	25
1967	0.986688	0.0133117	1	0.888692	96	26
1968	0.986693	0.0133069	1	0.888477	96	25
1969	0.986719	0.0132807	1	0.887297	96	25
1970	0.986719	0.0132807	1	0.887297	96	24
1971	0.986728	0.0132719	1	0.8869	96	25
1972	0.986728	0.0132719	1	0.8869	96	24
1973	0.986728	0.0132715	1	0.886884	96	23
1974	0.986729	0.0132712	1	0.886868	96	22
1975	0.986729	0.013271	1	0.886863	96	23
1976	0.986731	0.0132689	1	0.886765	96	22
1977	0.986731	0.0132687	1	0.886756	96	22
1978	0.986734	0.013266	1	0.886637	96	22
1979	0.986734	0.0132657	1	0.886621	96	21
1980	0.986752	0.0132479	1	0.885822	96	20
1981	0.986788	0.0132123	1	0.884219	96	20
1982	0.986802	0.0131976	1	0.883558	96	19
1983	0.986805	0.0131945	1	0.883418	96	18
1984	0.986817	0.0131834	1	0.882917	96	19
1985	0.986912	0.0130882	1	0.878634	96	20
1986	0.986994	0.0130058	1	0.874928	96	19
1987	0.987051	0.0129486	1	0.872354	96	19
1988	0.987114	0.012886	1	0.869537	96	19
1989	0.987161	0.0128392	1	0.86743	96	20
1990	0.987169	0.0128308	1	0.86705	96	19
1991	0.987169	0.0128306	1	0.867043	96	18
1992	0.987173	0.0128268	1	0.866871	96	18
1993	0.987188	0.0128119	1	0.8662	96	19
1994	0.987195	0.0128049	1	0.865888	96	19
1995	0.987202	0.0127982	1	0.865583	96	18
1996	0.987213	0.0127874	1	0.865098	96	19
1997	0.98722	0.0127802	1	0.864776	96	19
1998	0.987226	0.0127738	1	0.864486	96	19
[truncated: 398,001+ more rows]

## Sheet: Trophallaxis_data_1D
step	colony state	empty colony state	repeat	forager/recipient crop	interaction volume	ant type	position	trip
1	0.00487206	0.995128	1	0.780758	0.219242	Forager	1	1
1	0.00487206	0.995128	1	0.219242		Nestmate	1
3	0.00954675	0.990453	1	0.789639	0.210361	Forager	1	2
3	0.00954675	0.990453	1	0.210361		Nestmate	1
4	0.0164493	0.983551	1	0.479026	0.310613	Forager	2	2
4	0.0164493	0.983551	1	0.310613		Nestmate	2
5	0.0270943	0.972906	1	0	0.479026	Forager	3	2
5	0.0270943	0.972906	1	0.479026		Nestmate	3
23	0.0295659	0.970434	1	0.888776	0.111224	Forager	1	3
23	0.0295659	0.970434	1	0.111224		Nestmate	1
24	0.0300289	0.969971	1	0.867941	0.020835	Forager	1	3
24	0.0300289	0.969971	1	0.132059		Nestmate	1
25	0.0493165	0.950684	1	0	0.867941	Forager	2	3
25	0.0493165	0.950684	1	0.867941		Nestmate	2
30	0.051918	0.948082	1	0.882932	0.117068	Forager	1	4
30	0.051918	0.948082	1	0.117068		Nestmate	1
31	0.0527726	0.947227	1	0.844476	0.0384563	Forager	2	4
31	0.0527726	0.947227	1	0.0384563		Nestmate	2
32	0.056636	0.943364	1	0.670622	0.173853	Forager	3	4
32	0.056636	0.943364	1	0.173853		Nestmate	3
33	0.0650017	0.934998	1	0.294165	0.376457	Forager	4	4
33	0.0650017	0.934998	1	0.376457		Nestmate	4
34	0.0690608	0.930939	1	0.111506	0.182659	Forager	3	4
34	0.0690608	0.930939	1	0.356512		Nestmate	3
35	0.0715387	0.928461	1	0	0.111506	Forager	2	4
35	0.0715387	0.928461	1	0.149962		Nestmate	2
38	0.073317	0.926683	1	0.919976	0.0800241	Forager	1	5
38	0.073317	0.926683	1	0.0800241		Nestmate	1
39	0.0814066	0.918593	1	0.555947	0.364029	Forager	2	5
39	0.0814066	0.918593	1	0.364029		Nestmate	2
40	0.0850385	0.914961	1	0.392508	0.163438	Forager	1	5
40	0.0850385	0.914961	1	0.243462		Nestmate	1
41	0.0874126	0.912587	1	0.285675	0.106834	Forager	2	5
41	0.0874126	0.912587	1	0.470863		Nestmate	2
42	0.0874917	0.912508	1	0.282118	0.0035571	Forager	1	5
42	0.0874917	0.912508	1	0.247019		Nestmate	1
43	0.0937609	0.906239	1	0	0.282118	Forager	2	5
43	0.0937609	0.906239	1	0.752981		Nestmate	2
60	0.0957261	0.904274	1	0.911569	0.0884314	Forager	1	6
60	0.0957261	0.904274	1	0.0884314		Nestmate	1
61	0.102736	0.897264	1	0.596104	0.315464	Forager	1	6
61	0.102736	0.897264	1	0.403896		Nestmate	1
63	0.103236	0.896764	1	0.977511	0.0224885	Forager	1	7
63	0.103236	0.896764	1	0.89043		Nestmate	1
64	0.106813	0.893187	1	0.816541	0.16097	Forager	2	7
64	0.106813	0.893187	1	0.639996		Nestmate	2
65	0.109594	0.890406	1	0.69143	0.125111	Forager	3	7
65	0.109594	0.890406	1	0.344354		Nestmate	3
66	0.113298	0.886702	1	0.524737	0.166693	Forager	4	7
66	0.113298	0.886702	1	0.166693		Nestmate	4
67	0.113945	0.886055	1	0.495617	0.0291199	Forager	4	7
67	0.113945	0.886055	1	0.195813		Nestmate	4
68	0.118565	0.881435	1	0.287716	0.2079	Forager	5	7
68	0.118565	0.881435	1	0.2079		Nestmate	5
69	0.118912	0.881088	1	0.272087	0.0156293	Forager	4	7
69	0.118912	0.881088	1	0.211442		Nestmate	4
70	0.11914	0.88086	1	0.261831	0.010256	Forager	3	7
70	0.11914	0.88086	1	0.35461		Nestmate	3
71	0.119854	0.880146	1	0.229699	0.0321323	Forager	2	7
71	0.119854	0.880146	1	0.672129		Nestmate	2
72	0.121119	0.878881	1	0.172768	0.0569309	Forager	2	7
72	0.121119	0.878881	1	0.729059		Nestmate	2
73	0.121341	0.878659	1	0.16281	0.00995748	Forager	2	7
73	0.121341	0.878659	1	0.739017		Nestmate	2
74	0.121735	0.878265	1	0.145075	0.0177356	Forager	1	7
74	0.121735	0.878265	1	0.908165		Nestmate	1
76	0.133322	0.866678	1	0.478584	0.521416	Forager	1	8
76	0.133322	0.866678	1	0.521416		Nestmate	1
78	0.133639	0.866361	1	0.985739	0.0142605	Forager	1	9
78	0.133639	0.866361	1	0.0142605		Nestmate	1
80	0.133948	0.866052	1	0.986076	0.0139242	Forager	1	10
80	0.133948	0.866052	1	0.535341		Nestmate	1
82	0.135398	0.864602	1	0.934739	0.0652614	Forager	1	11
82	0.135398	0.864602	1	0.0652614		Nestmate	1
83	0.141877	0.858123	1	0.643219	0.29152	Forager	2	11
83	0.141877	0.858123	1	0.29152		Nestmate	2
84	0.146563	0.853437	1	0.432328	0.210891	Forager	1	11
84	0.146563	0.853437	1	0.276152		Nestmate	1
85	0.147041	0.852959	1	0.410825	0.0215033	Forager	2	11
85	0.147041	0.852959	1	0.313023		Nestmate	2
86	0.147399	0.852601	1	0.394726	0.0160993	Forager	2	11
86	0.147399	0.852601	1	0.329122		Nestmate	2
87	0.147412	0.852588	1	0.394141	0.000585006	Forager	1	11
87	0.147412	0.852588	1	0.276737		Nestmate	1
89	0.148626	0.851374	1	0.94535	0.0546499	Forager	1	12
89	0.148626	0.851374	1	0.0546499		Nestmate	1
91	0.14867	0.85133	1	0.998013	0.00198723	Forager	1	13
91	0.14867	0.85133	1	0.278724		Nestmate	1
92	0.15041	0.84959	1	0.919717	0.0782953	Forager	2	13
92	0.15041	0.84959	1	0.0782953		Nestmate	2
93	0.152664	0.847336	1	0.818296	0.101421	Forager	3	13
93	0.152664	0.847336	1	0.101421		Nestmate	3
94	0.15682	0.84318	1	0.631283	0.187014	Forager	3	13
94	0.15682	0.84318	1	0.288435		Nestmate	3
95	0.163108	0.836892	1	0.348303	0.28298	Forager	3	13
95	0.163108	0.836892	1	0.571415		Nestmate	3
96	0.164327	0.835673	1	0.293481	0.054822	Forager	3	13
96	0.164327	0.835673	1	0.626237		Nestmate	3
97	0.166198	0.833802	1	0.209287	0.0841939	Forager	4	13
97	0.166198	0.833802	1	0.0841939		Nestmate	4
98	0.167638	0.832362	1	0.144451	0.0648353	Forager	4	13
98	0.167638	0.832362	1	0.149029		Nestmate	4
99	0.167803	0.832197	1	0.137036	0.0074156	Forager	3	13
99	0.167803	0.832197	1	0.633652		Nestmate	3
100	0.170848	0.829152	1	0	0.137036	Forager	2	13
100	0.170848	0.829152	1	0.215331		Nestmate	2
108	0.171827	0.828173	1	0.95598	0.0440203	Forager	1	14
108	0.171827	0.828173	1	0.19305		Nestmate	1
109	0.175413	0.824587	1	0.794607	0.161373	Forager	2	14
109	0.175413	0.824587	1	0.371735		Nestmate	2
110	0.17566	0.82434	1	0.783453	0.0111538	Forager	3	14
110	0.17566	0.82434	1	0.919319		Nestmate	3
111	0.178102	0.821898	1	0.673583	0.109869	Forager	4	14
111	0.178102	0.821898	1	0.109869		Nestmate	4
112	0.178283	0.821717	1	0.665433	0.00815003	Forager	3	14
112	0.178283	0.821717	1	0.927469		Nestmate	3
113	0.178754	0.821246	1	0.644235	0.0211984	Forager	4	14
113	0.178754	0.821246	1	0.131068		Nestmate	4
114	0.179003	0.820997	1	0.633038	0.0111971	Forager	5	14
114	0.179003	0.820997	1	0.32181		Nestmate	5
115	0.184438	0.815562	1	0.388447	0.244591	Forager	6	14
115	0.184438	0.815562	1	0.37665		Nestmate	6
116	0.18845	0.81155	1	0.207939	0.180507	Forager	5	14
116	0.18845	0.81155	1	0.502317		Nestmate	5
117	0.193071	0.806929	1	0	0.207939	Forager	4	14
117	0.193071	0.806929	1	0.339007		Nestmate	4
133	0.200235	0.799765	1	0.677598	0.322402	Forager	1	15
133	0.200235	0.799765	1	0.322402		Nestmate	1
134	0.205252	0.794748	1	0.451844	0.225753	Forager	1	15
134	0.205252	0.794748	1	0.548156		Nestmate	1
135	0.206757	0.793243	1	0.384099	0.0677452	Forager	2	15
135	0.206757	0.793243	1	0.0677452		Nestmate	2
136	0.207188	0.792812	1	0.364704	0.0193955	Forager	1	15
136	0.207188	0.792812	1	0.567551		Nestmate	1
137	0.207582	0.792418	1	0.34698	0.0177241	Forager	1	15
137	0.207582	0.792418	1	0.585275		Nestmate	1
139	0.210289	0.789711	1	0.878178	0.121822	Forager	1	16
139	0.210289	0.789711	1	0.121822		Nestmate	1
140	0.214822	0.785178	1	0.674209	0.203969	Forager	1	16
140	0.214822	0.785178	1	0.325791		Nestmate	1
142	0.215162	0.784838	1	0.984708	0.015292	Forager	1	17
142	0.215162	0.784838	1	0.015292		Nestmate	1
143	0.216472	0.783528	1	0.92576	0.0589479	Forager	2	17
143	0.216472	0.783528	1	0.435598		Nestmate	2
144	0.216738	0.783262	1	0.913795	0.0119646	Forager	2	17
144	0.216738	0.783262	1	0.447562		Nestmate	2
145	0.225997	0.774003	1	0.497102	0.416694	Forager	3	17
145	0.225997	0.774003	1	0.416694		Nestmate	3
146	0.229765	0.770235	1	0.327552	0.169549	Forager	4	17
146	0.229765	0.770235	1	0.754825		Nestmate	4
147	0.230733	0.769267	1	0.284	0.0435521	Forager	3	17
147	0.230733	0.769267	1	0.460246		Nestmate	3
148	0.231226	0.768774	1	0.261823	0.0221774	Forager	3	17
148	0.231226	0.768774	1	0.482423		Nestmate	3
149	0.234335	0.765665	1	0.121918	0.139904	Forager	3	17
149	0.234335	0.765665	1	0.622328		Nestmate	3
150	0.234854	0.765146	1	0.0985705	0.0233476	Forager	3	17
150	0.234854	0.765146	1	0.645676		Nestmate	3
151	0.237044	0.762956	1	0	0.0985705	Forager	3	17
151	0.237044	0.762956	1	0.744246		Nestmate	3
166	0.242379	0.757621	1	0.75995	0.24005	Forager	1	18
166	0.242379	0.757621	1	0.24005		Nestmate	1
168	0.243461	0.756539	1	0.951295	0.0487047	Forager	1	19
168	0.243461	0.756539	1	0.0629652		Nestmate	1
169	0.246667	0.753333	1	0.807037	0.144258	Forager	1	19
169	0.246667	0.753333	1	0.207223		Nestmate	1
170	0.246886	0.753114	1	0.797173	0.00986433	Forager	1	19
170	0.246886	0.753114	1	0.217088		Nestmate	1
171	0.248614	0.751386	1	0.71941	0.0777626	Forager	2	19
171	0.248614	0.751386	1	0.194831		Nestmate	2
172	0.248969	0.751031	1	0.703432	0.0159781	Forager	3	19
172	0.248969	0.751031	1	0.256028		Nestmate	3
173	0.250232	0.749768	1	0.646614	0.0568184	Forager	4	19
173	0.250232	0.749768	1	0.801064		Nestmate	4
174	0.25059	0.74941	1	0.630492	0.016122	Forager	4	19
174	0.25059	0.74941	1	0.817187		Nestmate	4
175	0.2532	0.7468	1	0.513047	0.117444	Forager	3	19
175	0.2532	0.7468	1	0.373472		Nestmate	3
176	0.253645	0.746355	1	0.493028	0.0200194	Forager	2	19
176	0.253645	0.746355	1	0.21485		Nestmate	2
177	0.264601	0.735399	1	0	0.493028	Forager	2	19
177	0.264601	0.735399	1	0.707878		Nestmate	2
187	0.26525	0.73475	1	0.9708	0.0292004	Forager	1	20
187	0.26525	0.73475	1	0.358323		Nestmate	1
188	0.273706	0.726294	1	0.590279	0.380521	Forager	2	20
188	0.273706	0.726294	1	0.380521		Nestmate	2
189	0.274442	0.725558	1	0.557137	0.0331412	Forager	3	20
189	0.274442	0.725558	1	0.372148		Nestmate	3
190	0.280812	0.719188	1	0.270496	0.286642	Forager	4	20
190	0.280812	0.719188	1	0.286642		Nestmate	4
191	0.281187	0.718813	1	0.253622	0.0168743	Forager	4	20
191	0.281187	0.718813	1	0.303516		Nestmate	4
192	0.28443	0.71557	1	0.107705	0.145917	Forager	4	20
192	0.28443	0.71557	1	0.449433		Nestmate	4
193	0.28577	0.71423	1	0.0473886	0.060316	Forager	3	20
193	0.28577	0.71423	1	0.432464		Nestmate	3
194	0.286589	0.713411	1	0.0105295	0.036859	Forager	4	20
194	0.286589	0.713411	1	0.486292		Nestmate	4
195	0.286823	0.713177	1	0	0.0105295	Forager	4	20
195	0.286823	0.713177	1	0.496821		Nestmate	4
205	0.290285	0.709715	1	0.844189	0.155811	Forager	1	21
205	0.290285	0.709715	1	0.527545		Nestmate	1
207	0.291987	0.708013	1	0.92344	0.0765604	Forager	1	22
207	0.291987	0.708013	1	0.0765604		Nestmate	1
208	0.292234	0.707766	1	0.9123	0.0111394	Forager	2	22
208	0.292234	0.707766	1	0.644792		Nestmate	2
209	0.292623	0.707377	1	0.894826	0.0174746	Forager	2	22
209	0.292623	0.707377	1	0.662266		Nestmate	2
210	0.292729	0.707271	1	0.89003	0.00479513	Forager	3	22
210	0.292729	0.707271	1	0.00479513		Nestmate	3
211	0.292835	0.707165	1	0.885278	0.00475283	Forager	2	22
211	0.292835	0.707165	1	0.667019		Nestmate	2
212	0.293955	0.706045	1	0.834884	0.0503939	Forager	3	22
212	0.293955	0.706045	1	0.055189		Nestmate	3
213	0.299271	0.700729	1	0.595666	0.239218	Forager	3	22
213	0.299271	0.700729	1	0.294407		Nestmate	3
214	0.300022	0.699978	1	0.561848	0.0338182	Forager	2	22
214	0.300022	0.699978	1	0.700837		Nestmate	2
215	0.300294	0.699706	1	0.549637	0.0122105	Forager	3	22
215	0.300294	0.699706	1	0.306617		Nestmate	3
216	0.302949	0.697051	1	0.43013	0.119507	Forager	2	22
216	0.302949	0.697051	1	0.820345		Nestmate	2
217	0.312508	0.687492	1	0	0.43013	Forager	1	22
217	0.312508	0.687492	1	0.50669		Nestmate	1
222	0.312713	0.687287	1	0.990754	0.0092465	Forager	1	23
222	0.312713	0.687287	1	0.256266		Nestmate	1
223	0.313866	0.686134	1	0.938875	0.0518783	Forager	2	23
223	0.313866	0.686134	1	0.0518783		Nestmate	2
224	0.314172	0.685828	1	0.925111	0.0137639	Forager	2	23
224	0.314172	0.685828	1	0.0656422		Nestmate	2
225	0.318643	0.681357	1	0.723921	0.20119	Forager	1	23
225	0.318643	0.681357	1	0.457456		Nestmate	1
227	0.320797	0.679203	1	0.903057	0.0969433	Forager	1	24
227	0.320797	0.679203	1	0.0969433		Nestmate	1
229	0.321595	0.678405	1	0.964089	0.0359108	Forager	1	25
229	0.321595	0.678405	1	0.774928		Nestmate	1
230	0.321642	0.678358	1	0.961971	0.00211829	Forager	1	25
230	0.321642	0.678358	1	0.777046		Nestmate	1
231	0.321875	0.678125	1	0.951494	0.0104769	Forager	1	25
231	0.321875	0.678125	1	0.787523		Nestmate	1
232	0.32723	0.67277	1	0.710539	0.240955	Forager	2	25
232	0.32723	0.67277	1	0.614427		Nestmate	2
233	0.327819	0.672181	1	0.684001	0.0265382	Forager	3	25
233	0.327819	0.672181	1	0.528856		Nestmate	3
234	0.327855	0.672145	1	0.682409	0.00159196	Forager	3	25
234	0.327855	0.672145	1	0.530448		Nestmate	3
235	0.328059	0.671941	1	0.673221	0.00918862	Forager	3	25
235	0.328059	0.671941	1	0.539636		Nestmate	3
236	0.328877	0.671123	1	0.636425	0.0367954	Forager	3	25
236	0.328877	0.671123	1	0.576432		Nestmate	3
237	0.328889	0.671111	1	0.635872	0.000553106	Forager	2	25
237	0.328889	0.671111	1	0.61498		Nestmate	2
238	0.329997	0.670003	1	0.58601	0.0498621	Forager	1	25
238	0.329997	0.670003	1	0.837385		Nestmate	1
240	0.33194	0.66806	1	0.912557	0.0874431	Forager	1	26
240	0.33194	0.66806	1	0.445766		Nestmate	1
241	0.332491	0.667509	1	0.88776	0.0247971	Forager	2	26
241	0.332491	0.667509	1	0.531487		Nestmate	2
242	0.333742	0.666258	1	0.831472	0.0562876	Forager	3	26
242	0.333742	0.666258	1	0.583833		Nestmate	3
243	0.336983	0.663017	1	0.685632	0.14584	Forager	4	26
243	0.336983	0.663017	1	0.898821		Nestmate	4
244	0.349816	0.650184	1	0.108129	0.577504	Forager	5	26
244	0.349816	0.650184	1	0.643146		Nestmate	5
245	0.350829	0.649171	1	0.0625527	0.045576	Forager	5	26
245	0.350829	0.649171	1	0.688722		Nestmate	5
246	0.351683	0.648317	1	0.0241194	0.0384333	Forager	4	26
246	0.351683	0.648317	1	0.937254		Nestmate	4
247	0.351931	0.648069	1	0.0129501	0.0111693	Forager	3	26
247	0.351931	0.648069	1	0.595002		Nestmate	3
248	0.352183	0.647817	1	0.00164219	0.0113079	Forager	2	26
248	0.352183	0.647817	1	0.542795		Nestmate	2
249	0.352219	0.647781	1	0	0.00164219	Forager	3	26
249	0.352219	0.647781	1	0.596644		Nestmate	3
261	0.356815	0.643185	1	0.793168	0.206832	Forager	1	27
261	0.356815	0.643185	1	0.274577		Nestmate	1
262	0.357867	0.642133	1	0.745855	0.0473136	Forager	2	27
262	0.357867	0.642133	1	0.326038		Nestmate	2
263	0.36117	0.63883	1	0.597223	0.148631	Forager	2	27
263	0.36117	0.63883	1	0.474669		Nestmate	2
264	0.363893	0.636107	1	0.474683	0.122541	Forager	1	27
264	0.363893	0.636107	1	0.397118		Nestmate	1
266	0.367367	0.632633	1	0.843676	0.156324	Forager	1	28
266	0.367367	0.632633	1	0.691665		Nestmate	1
267	0.368296	0.631704	1	0.801838	0.0418376	Forager	2	28
267	0.368296	0.631704	1	0.638482		Nestmate	2
268	0.368464	0.631536	1	0.794281	0.00755713	Forager	3	28
268	0.368464	0.631536	1	0.824744		Nestmate	3
269	0.369667	0.630333	1	0.740138	0.0541428	Forager	2	28
269	0.369667	0.630333	1	0.692625		Nestmate	2
270	0.37006	0.62994	1	0.722464	0.0176748	Forager	1	28
270	0.37006	0.62994	1	0.70934		Nestmate	1
272	0.371859	0.628141	1	0.91906	0.0809398	Forager	1	29
272	0.371859	0.628141	1	0.387557		Nestmate	1
273	0.373095	0.626905	1	0.863433	0.0556273	Forager	2	29
273	0.373095	0.626905	1	0.875972		Nestmate	2
274	0.378414	0.621586	1	0.624103	0.23933	Forager	3	29
274	0.378414	0.621586	1	0.29398		Nestmate	3
275	0.379837	0.620163	1	0.560042	0.0640611	Forager	3	29
275	0.379837	0.620163	1	0.358041		Nestmate	3
276	0.381985	0.618015	1	0.463374	0.0966673	Forager	4	29
276	0.381985	0.618015	1	0.593489		Nestmate	4
277	0.392282	0.607718	1	0	0.463374	Forager	3	29
277	0.392282	0.607718	1	0.821415		Nestmate	3
284	0.39421	0.60579	1	0.913257	0.0867429	Forager	1	30
284	0.39421	0.60579	1	0.519207		Nestmate	1
286	0.397228	0.602772	1	0.864206	0.135794	Forager	1	31
286	0.397228	0.602772	1	0.135794		Nestmate	1
288	0.398548	0.601452	1	0.940598	0.0594019	Forager	1	32
288	0.398548	0.601452	1	0.516858		Nestmate	1
289	0.399492	0.600508	1	0.898125	0.0424735	Forager	2	32
289	0.399492	0.600508	1	0.969943		Nestmate	2
290	0.39953	0.60047	1	0.896422	0.00170297	Forager	2	32
290	0.39953	0.60047	1	0.971646		Nestmate	2
291	0.399535	0.600465	1	0.89616	0.000261577	Forager	3	32
291	0.399535	0.600465	1	0.354871		Nestmate	3
292	0.408886	0.591114	1	0.475386	0.420774	Forager	3	32
292	0.408886	0.591114	1	0.775646		Nestmate	3
293	0.408906	0.591094	1	0.474487	0.000898411	Forager	2	32
293	0.408906	0.591094	1	0.972544		Nestmate	2
294	0.409943	0.590057	1	0.427822	0.0466648	Forager	1	32
294	0.409943	0.590057	1	0.563523		Nestmate	1
296	0.415008	0.584992	1	0.772071	0.227929	Forager	1	33
296	0.415008	0.584992	1	0.377891		Nestmate	1
298	0.415977	0.584023	1	0.95638	0.0436196	Forager	1	34
298	0.415977	0.584023	1	0.732341		Nestmate	1
299	0.416035	0.583965	1	0.953796	0.00258408	Forager	2	34
299	0.416035	0.583965	1	0.824		Nestmate	2
300	0.42115	0.57885	1	0.723594	0.230203	Forager	3	34
300	0.42115	0.57885	1	0.245495		Nestmate	3
301	0.421299	0.578701	1	0.716914	0.00668006	Forager	4	34
301	0.421299	0.578701	1	0.699305		Nestmate	4
302	0.422707	0.577293	1	0.653546	0.0633675	Forager	3	34
302	0.422707	0.577293	1	0.308862		Nestmate	3
303	0.424014	0.575986	1	0.59474	0.0588057	Forager	2	34
303	0.424014	0.575986	1	0.882805		Nestmate	2
304	0.425798	0.574202	1	0.514465	0.0802756	Forager	3	34
304	0.425798	0.574202	1	0.389138		Nestmate	3
305	0.426176	0.573824	1	0.497415	0.01705	Forager	4	34
305	0.426176	0.573824	1	0.716355		Nestmate	4
306	0.426726	0.573274	1	0.472671	0.0247434	Forager	3	34
306	0.426726	0.573274	1	0.413881		Nestmate	3
307	0.429697	0.570303	1	0.338985	0.133686	Forager	4	34
307	0.429697	0.570303	1	0.850041		Nestmate	4
308	0.432415	0.567585	1	0.216703	0.122283	Forager	3	34
308	0.432415	0.567585	1	0.536164		Nestmate	3
309	0.433423	0.566577	1	0.171301	0.045402	Forager	2	34
309	0.433423	0.566577	1	0.928207		Nestmate	2
310	0.433616	0.566384	1	0.162657	0.00864357	Forager	1	34
310	0.433616	0.566384	1	0.740985		Nestmate	1
312	0.435185	0.564815	1	0.929389	0.0706106	Forager	1	35
312	0.435185	0.564815	1	0.278511		Nestmate	1
314	0.435198	0.564802	1	0.999394	0.000606078	Forager	1	36
314	0.435198	0.564802	1	0.97315		Nestmate	1
316	0.436979	0.563021	1	0.91986	0.0801399	Forager	1	37
316	0.436979	0.563021	1	0.477258		Nestmate	1
317	0.437297	0.562703	1	0.905546	0.0143136	Forager	2	37
317	0.437297	0.562703	1	0.0143136		Nestmate	2
318	0.43753	0.56247	1	0.895064	0.010482	Forager	3	37
318	0.43753	0.56247	1	0.71836		Nestmate	3
319	0.43862	0.56138	1	0.846003	0.0490616	Forager	2	37
319	0.43862	0.56138	1	0.0633752		Nestmate	2
320	0.440857	0.559143	1	0.745337	0.100666	Forager	3	37
320	0.440857	0.559143	1	0.819026		Nestmate	3
321	0.441307	0.558693	1	0.725084	0.0202522	Forager	2	37
321	0.441307	0.558693	1	0.0836273		Nestmate	2
322	0.441809	0.558191	1	0.702528	0.0225564	Forager	2	37
322	0.441809	0.558191	1	0.106184		Nestmate	2
323	0.441903	0.558097	1	0.698269	0.00425903	Forager	1	37
323	0.441903	0.558097	1	0.481517		Nestmate	1
325	0.446809	0.553191	1	0.779238	0.220762	Forager	1	38
325	0.446809	0.553191	1	0.220762		Nestmate	1
326	0.447711	0.552289	1	0.738662	0.040576	Forager	2	38
326	0.447711	0.552289	1	0.859602		Nestmate	2
327	0.448331	0.551669	1	0.710761	0.0279011	Forager	3	38
327	0.448331	0.551669	1	0.865286		Nestmate	3
328	0.448358	0.551642	1	0.70953	0.00123119	Forager	3	38
328	0.448358	0.551642	1	0.866517		Nestmate	3
329	0.44851	0.55149	1	0.702676	0.00685381	Forager	4	38
329	0.44851	0.55149	1	0.454416		Nestmate	4
330	0.448675	0.551325	1	0.695259	0.00741741	Forager	5	38
330	0.448675	0.551325	1	0.832161		Nestmate	5
331	0.44871	0.55129	1	0.693682	0.0015765	Forager	6	38
331	0.44871	0.55129	1	0.218664		Nestmate	6
332	0.450188	0.549812	1	0.627201	0.0664814	Forager	6	38
332	0.450188	0.549812	1	0.285146		Nestmate	6
333	0.450322	0.549678	1	0.621172	0.00602854	Forager	5	38
333	0.450322	0.549678	1	0.83819		Nestmate	5
334	0.450548	0.549452	1	0.610996	0.0101766	Forager	5	38
334	0.450548	0.549452	1	0.848366		Nestmate	5
335	0.454175	0.545825	1	0.447779	0.163216	Forager	6	38
335	0.454175	0.545825	1	0.448362		Nestmate	6
336	0.454391	0.545609	1	0.438066	0.00971284	Forager	5	38
336	0.454391	0.545609	1	0.858079		Nestmate	5
337	0.454667	0.545333	1	0.425623	0.0124431	Forager	6	38
337	0.454667	0.545333	1	0.460805		Nestmate	6
338	0.455568	0.544432	1	0.385065	0.0405589	Forager	5	38
338	0.455568	0.544432	1	0.898638		Nestmate	5
339	0.455762	0.544238	1	0.376349	0.00871587	Forager	4	38
339	0.455762	0.544238	1	0.463132		Nestmate	4
340	0.457097	0.542903	1	0.316276	0.0600725	Forager	3	38
340	0.457097	0.542903	1	0.92659		Nestmate	3
341	0.457429	0.542571	1	0.301361	0.0149152	Forager	2	38
341	0.457429	0.542571	1	0.874517		Nestmate	2
342	0.459475	0.540525	1	0.20926	0.0921014	Forager	1	38
342	0.459475	0.540525	1	0.312863		Nestmate	1
344	0.463945	0.536055	1	0.798855	0.201145	Forager	1	39
344	0.463945	0.536055	1	0.514008		Nestmate	1
345	0.464897	0.535103	1	0.756012	0.0428436	Forager	1	39
345	0.464897	0.535103	1	0.556851		Nestmate	1
347	0.466717	0.533283	1	0.918118	0.0818823	Forager	1	40
347	0.466717	0.533283	1	0.624678		Nestmate	1
348	0.467865	0.532135	1	0.866466	0.0516517	Forager	2	40
348	0.467865	0.532135	1	0.187446		Nestmate	2
349	0.470668	0.529332	1	0.740319	0.126147	Forager	1	40
349	0.470668	0.529332	1	0.750825		Nestmate	1
351	0.476397	0.523603	1	0.74219	0.25781	Forager	1	41
351	0.476397	0.523603	1	0.635701		Nestmate	1
353	0.476536	0.523464	1	0.993724	0.0062759	Forager	1	42
353	0.476536	0.523464	1	0.932866		Nestmate	1
355	0.476927	0.523073	1	0.98243	0.01757	Forager	1	43
355	0.476927	0.523073	1	0.793216		Nestmate	1
357	0.478369	0.521631	1	0.935127	0.0648731	Forager	1	44
357	0.478369	0.521631	1	0.58408		Nestmate	1
358	0.479697	0.520303	1	0.875361	0.0597662	Forager	1	44
358	0.479697	0.520303	1	0.643846		Nestmate	1
360	0.483046	0.516954	1	0.849278	0.150722	Forager	1	45
360	0.483046	0.516954	1	0.362165		Nestmate	1
362	0.484432	0.515568	1	0.93765	0.0623498	Forager	1	46
362	0.484432	0.515568	1	0.508116		Nestmate	1
364	0.484673	0.515327	1	0.989123	0.010877	Forager	1	47
364	0.484673	0.515327	1	0.909515		Nestmate	1
365	0.485041	0.514959	1	0.972568	0.016555	Forager	1	47
365	0.485041	0.514959	1	0.92607		Nestmate	1
366	0.48536	0.51464	1	0.958243	0.0143251	Forager	2	47
366	0.48536	0.51464	1	0.370837		Nestmate	2
367	0.487854	0.512146	1	0.846013	0.11223	Forager	3	47
367	0.487854	0.512146	1	0.863055		Nestmate	3
368	0.488429	0.511571	1	0.820101	0.0259118	Forager	4	47
368	0.488429	0.511571	1	0.406433		Nestmate	4
369	0.488861	0.511139	1	0.800668	0.0194324	Forager	3	47
369	0.488861	0.511139	1	0.882488		Nestmate	3
370	0.489787	0.510213	1	0.759006	0.041662	Forager	4	47
370	0.489787	0.510213	1	0.448095		Nestmate	4
371	0.489853	0.510147	1	0.756029	0.00297722	Forager	3	47
371	0.489853	0.510147	1	0.885465		Nestmate	3
372	0.490344	0.509656	1	0.733959	0.0220701	Forager	3	47
372	0.490344	0.509656	1	0.907535		Nestmate	3
373	0.492526	0.507474	1	0.635772	0.0981872	Forager	4	47
373	0.492526	0.507474	1	0.546282		Nestmate	4
374	0.492529	0.507471	1	0.635636	0.000135522	Forager	3	47
374	0.492529	0.507471	1	0.90767		Nestmate	3
375	0.493533	0.506467	1	0.590453	0.0451838	Forager	4	47
375	0.493533	0.506467	1	0.591466		Nestmate	4
376	0.49359	0.50641	1	0.587852	0.00260018	Forager	3	47
376	0.49359	0.50641	1	0.910271		Nestmate	3
377	0.493869	0.506131	1	0.575315	0.0125373	Forager	2	47
377	0.493869	0.506131	1	0.383375		Nestmate	2
378	0.49453	0.50547	1	0.545575	0.02974	Forager	3	47
378	0.49453	0.50547	1	0.940011		Nestmate	3
379	0.497799	0.502201	1	0.398458	0.147118	Forager	2	47
379	0.497799	0.502201	1	0.530492		Nestmate	2
380	0.498436	0.501564	1	0.369784	0.028674	Forager	2	47
380	0.498436	0.501564	1	0.559166		Nestmate	2
381	0.498535	0.501465	1	0.365367	0.0044168	Forager	1	47
381	0.498535	0.501465	1	0.930487		Nestmate	1
383	0.500463	0.499537	1	0.913224	0.0867759	Forager	1	48
383	0.500463	0.499537	1	0.463233		Nestmate	1
384	0.500511	0.499489	1	0.911075	0.00214875	Forager	2	48
384	0.500511	0.499489	1	0.939403		Nestmate	2
385	0.500512	0.499488	1	0.911025	5.02769e-05	Forager	2	48
385	0.500512	0.499488	1	0.939453		Nestmate	2
386	0.500548	0.499452	1	0.909378	0.00164709	Forager	2	48
386	0.500548	0.499452	1	0.9411		Nestmate	2
387	0.500575	0.499425	1	0.908175	0.00120331	Forager	2	48
387	0.500575	0.499425	1	0.942303		Nestmate	2
388	0.500611	0.499389	1	0.906578	0.00159652	Forager	3	48
388	0.500611	0.499389	1	0.877569		Nestmate	3
389	0.501834	0.498166	1	0.851507	0.0550709	Forager	4	48
389	0.501834	0.498166	1	0.270402		Nestmate	4
390	0.501944	0.498056	1	0.846597	0.00490981	Forager	5	48
390	0.501944	0.498056	1	0.97806		Nestmate	5
391	0.501948	0.498052	1	0.846391	0.0002069	Forager	5	48
391	0.501948	0.498052	1	0.978267		Nestmate	5
392	0.502081	0.497919	1	0.840428	0.00596268	Forager	4	48
392	0.502081	0.497919	1	0.276365		Nestmate	4
393	0.502087	0.497913	1	0.840147	0.000281302	Forager	5	48
393	0.502087	0.497913	1	0.978548		Nestmate	5
394	0.505019	0.494981	1	0.708209	0.131938	Forager	4	48
394	0.505019	0.494981	1	0.408303		Nestmate	4
395	0.505063	0.494937	1	0.706212	0.00199719	Forager	5	48
395	0.505063	0.494937	1	0.980545		Nestmate	5
396	0.505628	0.494372	1	0.680798	0.0254141	Forager	4	48
396	0.505628	0.494372	1	0.433717		Nestmate	4
397	0.505724	0.494276	1	0.676492	0.00430598	Forager	5	48
397	0.505724	0.494276	1	0.984851		Nestmate	5
398	0.508181	0.491819	1	0.565907	0.110585	Forager	4	48
398	0.508181	0.491819	1	0.544301		Nestmate	4
399	0.508535	0.491465	1	0.549961	0.0159457	Forager	3	48
399	0.508535	0.491465	1	0.893514		Nestmate	3
400	0.512138	0.487862	1	0.387856	0.162105	Forager	4	48
400	0.512138	0.487862	1	0.706407		Nestmate	4
401	0.512207	0.487793	1	0.384731	0.00312462	Forager	5	48
401	0.512207	0.487793	1	0.987976		Nestmate	5
402	0.512875	0.487125	1	0.354677	0.0300535	Forager	4	48
402	0.512875	0.487125	1	0.73646		Nestmate	4
403	0.513049	0.486951	1	0.346855	0.00782245	Forager	3	48
403	0.513049	0.486951	1	0.901337		Nestmate	3
404	0.513144	0.486856	1	0.342584	0.00427108	Forager	2	48
404	0.513144	0.486856	1	0.946574		Nestmate	2
405	0.518071	0.481929	1	0.120873	0.221711	Forager	1	48
405	0.518071	0.481929	1	0.684944		Nestmate	1
407	0.520339	0.479661	1	0.897913	0.102087	Forager	1	49
407	0.520339	0.479661	1	0.811427		Nestmate	1
408	0.520461	0.479539	1	0.892441	0.00547183	Forager	2	49
408	0.520461	0.479539	1	0.598961		Nestmate	2
409	0.520621	0.479379	1	0.885238	0.00720276	Forager	1	49
409	0.520621	0.479379	1	0.81863		Nestmate	1
411	0.522942	0.477058	1	0.895572	0.104428	Forager	1	50
411	0.522942	0.477058	1	0.104428		Nestmate	1
413	0.524361	0.475639	1	0.936125	0.0638751	Forager	1	51
413	0.524361	0.475639	1	0.52468		Nestmate	1
415	0.526164	0.473836	1	0.918889	0.0811107	Forager	1	52
415	0.526164	0.473836	1	0.55578		Nestmate	1
416	0.526478	0.473522	1	0.904736	0.0141533	Forager	2	52
416	0.526478	0.473522	1	0.864194		Nestmate	2
417	0.526626	0.473374	1	0.898085	0.00665081	Forager	2	52
417	0.526626	0.473374	1	0.870845		Nestmate	2
418	0.526736	0.473264	1	0.893138	0.00494677	Forager	1	52
418	0.526736	0.473264	1	0.560727		Nestmate	1
419	0.527056	0.472944	1	0.878721	0.0144175	Forager	2	52
419	0.527056	0.472944	1	0.885262		Nestmate	2
420	0.529192	0.470808	1	0.782589	0.0961322	Forager	2	52
420	0.529192	0.470808	1	0.981394		Nestmate	2
421	0.530981	0.469019	1	0.702121	0.0804681	Forager	3	52
421	0.530981	0.469019	1	0.695448		Nestmate	3
422	0.531448	0.468552	1	0.681067	0.0210536	Forager	3	52
422	0.531448	0.468552	1	0.716502		Nestmate	3
423	0.531467	0.468533	1	0.680221	0.000845469	Forager	2	52
423	0.531467	0.468533	1	0.98224		Nestmate	2
424	0.53151	0.46849	1	0.678318	0.00190317	Forager	2	52
424	0.53151	0.46849	1	0.984143		Nestmate	2
425	0.533587	0.466413	1	0.584836	0.093482	Forager	1	52
425	0.533587	0.466413	1	0.654209		Nestmate	1
426	0.533598	0.466402	1	0.584325	0.000511056	Forager	2	52
426	0.533598	0.466402	1	0.984654		Nestmate	2
427	0.538636	0.461364	1	0.357617	0.226709	Forager	1	52
427	0.538636	0.461364	1	0.880917		Nestmate	1
428	0.539585	0.460415	1	0.314921	0.0426955	Forager	1	52
428	0.539585	0.460415	1	0.923613		Nestmate	1
430	0.541374	0.458626	1	0.919512	0.0804882	Forager	1	53
430	0.541374	0.458626	1	0.639654		Nestmate	1
431	0.543057	0.456943	1	0.843768	0.0757436	Forager	1	53
431	0.543057	0.456943	1	0.715398		Nestmate	1
432	0.543416	0.456584	1	0.827619	0.0161489	Forager	2	53
432	0.543416	0.456584	1	0.122333		Nestmate	2
433	0.544123	0.455877	1	0.795771	0.0318478	Forager	1	53
433	0.544123	0.455877	1	0.747246		Nestmate	1
434	0.546495	0.453505	1	0.689067	0.106704	Forager	2	53
434	0.546495	0.453505	1	0.229037		Nestmate	2
435	0.548791	0.451209	1	0.585711	0.103356	Forager	3	53
435	0.548791	0.451209	1	0.2003		Nestmate	3
436	0.551447	0.448553	1	0.466212	0.119499	Forager	2	53
436	0.551447	0.448553	1	0.348536		Nestmate	2
437	0.552184	0.447816	1	0.433067	0.0331446	Forager	1	53
437	0.552184	0.447816	1	0.78039		Nestmate	1
438	0.552732	0.447268	1	0.408379	0.0246884	Forager	1	53
438	0.552732	0.447268	1	0.805079		Nestmate	1
440	0.554712	0.445288	1	0.910895	0.0891047	Forager	1	54
440	0.554712	0.445288	1	0.193533		Nestmate	1
441	0.555182	0.444818	1	0.889757	0.0211385	Forager	2	54
441	0.555182	0.444818	1	0.529254		Nestmate	2
442	0.555348	0.444652	1	0.882287	0.0074697	Forager	3	54
442	0.555348	0.444652	1	0.0074697		Nestmate	3
443	0.555523	0.444477	1	0.874427	0.00785961	Forager	4	54
443	0.555523	0.444477	1	0.643561		Nestmate	4
444	0.557199	0.442801	1	0.799003	0.0754248	Forager	4	54
444	0.557199	0.442801	1	0.718986		Nestmate	4
445	0.557482	0.442518	1	0.786238	0.0127647	Forager	4	54
445	0.557482	0.442518	1	0.73175		Nestmate	4
446	0.557965	0.442035	1	0.764516	0.0217219	Forager	3	54
446	0.557965	0.442035	1	0.0291916		Nestmate	3
447	0.558519	0.441481	1	0.739599	0.0249173	Forager	4	54
447	0.558519	0.441481	1	0.756668		Nestmate	4
448	0.558628	0.441372	1	0.734667	0.00493188	Forager	5	54
448	0.558628	0.441372	1	0.741392		Nestmate	5
449	0.558807	0.441193	1	0.726618	0.00804849	Forager	6	54
449	0.558807	0.441193	1	0.762873		Nestmate	6
450	0.561601	0.438399	1	0.600904	0.125715	Forager	5	54
450	0.561601	0.438399	1	0.867107		Nestmate	5
451	0.562804	0.437196	1	0.54676	0.0541433	Forager	6	54
451	0.562804	0.437196	1	0.817016		Nestmate	6
452	0.563013	0.436987	1	0.537365	0.00939551	Forager	6	54
452	0.563013	0.436987	1	0.826412		Nestmate	6
453	0.563686	0.436314	1	0.507061	0.0303033	Forager	5	54
453	0.563686	0.436314	1	0.89741		Nestmate	5
454	0.563775	0.436225	1	0.50306	0.00400143	Forager	6	54
454	0.563775	0.436225	1	0.830413		Nestmate	6
455	0.563809	0.436191	1	0.501521	0.00153859	Forager	5	54
455	0.563809	0.436191	1	0.898949		Nestmate	5
456	0.565665	0.434335	1	0.418035	0.0834866	Forager	6	54
456	0.565665	0.434335	1	0.9139		Nestmate	6
457	0.566219	0.433781	1	0.393079	0.0249555	Forager	7	54
457	0.566219	0.433781	1	0.488088		Nestmate	7
458	0.566274	0.433726	1	0.390613	0.00246589	Forager	6	54
458	0.566274	0.433726	1	0.916366		Nestmate	6
459	0.566338	0.433662	1	0.387741	0.00287201	Forager	5	54
459	0.566338	0.433662	1	0.901821		Nestmate	5
460	0.566775	0.433225	1	0.368063	0.0196783	Forager	4	54
460	0.566775	0.433225	1	0.776346		Nestmate	4
461	0.567838	0.432162	1	0.320243	0.0478203	Forager	3	54
461	0.567838	0.432162	1	0.0770118		Nestmate	3
462	0.568356	0.431644	1	0.296947	0.0232958	Forager	2	54
462	0.568356	0.431644	1	0.55255		Nestmate	2
463	0.571611	0.428389	1	0.150461	0.146486	Forager	1	54
463	0.571611	0.428389	1	0.340019		Nestmate	1
464	0.572028	0.427972	1	0.131683	0.0187776	Forager	2	54
464	0.572028	0.427972	1	0.571328		Nestmate	2
465	0.572049	0.427951	1	0.130759	0.000924603	Forager	3	54
465	0.572049	0.427951	1	0.0779364		Nestmate	3
466	0.572836	0.427164	1	0.0953298	0.0354287	Forager	4	54
466	0.572836	0.427164	1	0.811775		Nestmate	4
467	0.573846	0.426154	1	0.0498915	0.0454383	Forager	3	54
467	0.573846	0.426154	1	0.123375		Nestmate	3
468	0.574094	0.425906	1	0.0387282	0.0111633	Forager	2	54
468	0.574094	0.425906	1	0.582491		Nestmate	2
469	0.574954	0.425046	1	0	0.0387282	Forager	1	54
469	0.574954	0.425046	1	0.378747		Nestmate	1
471	0.577003	0.422997	1	0.907819	0.0921807	Forager	1	55
471	0.577003	0.422997	1	0.417972		Nestmate	1
472	0.586743	0.413257	1	0.469535	0.438284	Forager	1	55
472	0.586743	0.413257	1	0.856255		Nestmate	1
474	0.587691	0.412309	1	0.957315	0.0426854	Forager	1	56
474	0.587691	0.412309	1	0.242985		Nestmate	1
476	0.587794	0.412206	1	0.99535	0.00465015	Forager	1	57
476	0.587794	0.412206	1	0.989304		Nestmate	1
477	0.591024	0.408976	1	0.850026	0.145324	Forager	2	57
477	0.591024	0.408976	1	0.145324		Nestmate	2
478	0.594511	0.405489	1	0.69312	0.156907	Forager	2	57
478	0.594511	0.405489	1	0.30223		Nestmate	2
479	0.594616	0.405384	1	0.688384	0.00473612	Forager	3	57
479	0.594616	0.405384	1	0.587227		Nestmate	3
480	0.594829	0.405171	1	0.678793	0.00959047	Forager	4	57
480	0.594829	0.405171	1	0.925956		Nestmate	4
481	0.595498	0.404502	1	0.64867	0.0301233	Forager	5	57
481	0.595498	0.404502	1	0.629084		Nestmate	5
482	0.595674	0.404326	1	0.640754	0.00791561	Forager	4	57
482	0.595674	0.404326	1	0.933872		Nestmate	4
483	0.595955	0.404045	1	0.628117	0.0126374	Forager	3	57
483	0.595955	0.404045	1	0.599865		Nestmate	3
484	0.597378	0.402622	1	0.564092	0.0640246	Forager	2	57
484	0.597378	0.402622	1	0.366255		Nestmate	2
485	0.600345	0.399655	1	0.430571	0.133521	Forager	3	57
485	0.600345	0.399655	1	0.733385		Nestmate	3
486	0.602174	0.397826	1	0.348286	0.0822852	Forager	3	57
486	0.602174	0.397826	1	0.815671		Nestmate	3
487	0.602982	0.397018	1	0.311901	0.0363855	Forager	3	57
487	0.602982	0.397018	1	0.852056		Nestmate	3
488	0.603573	0.396427	1	0.285309	0.0265918	Forager	2	57
488	0.603573	0.396427	1	0.392847		Nestmate	2
489	0.604339	0.395661	1	0.250865	0.0344436	Forager	2	57
489	0.604339	0.395661	1	0.42729		Nestmate	2
490	0.605283	0.394717	1	0.208361	0.0425045	Forager	2	57
490	0.605283	0.394717	1	0.469795		Nestmate	2
491	0.605449	0.394551	1	0.200888	0.00747289	Forager	3	57
491	0.605449	0.394551	1	0.859529		Nestmate	3
492	0.606584	0.393416	1	0.14984	0.0510474	Forager	3	57
492	0.606584	0.393416	1	0.910576		Nestmate	3
493	0.608098	0.391902	1	0.0816709	0.0681694	Forager	2	57
493	0.608098	0.391902	1	0.537964		Nestmate	2
494	0.608784	0.391216	1	0.0508181	0.0308527	Forager	2	57
494	0.608784	0.391216	1	0.568817		Nestmate	2
495	0.608843	0.391157	1	0.0481431	0.00267505	Forager	1	57
495	0.608843	0.391157	1	0.991979		Nestmate	1
497	0.609347	0.390653	1	0.977356	0.0226438	Forager	1	58
497	0.609347	0.390653	1	0.547324		Nestmate	1
499	0.609796	0.390204	1	0.979775	0.0202246	Forager	1	59
499	0.609796	0.390204	1	0.664071		Nestmate	1
500	0.613099	0.386901	1	0.831151	0.148624	Forager	2	59
500	0.613099	0.386901	1	0.684788		Nestmate	2
501	0.613439	0.386561	1	0.815834	0.015317	Forager	3	59
501	0.613439	0.386561	1	0.871572		Nestmate	3
502	0.613765	0.386235	1	0.801173	0.014661	Forager	4	59
502	0.613765	0.386235	1	0.961235		Nestmate	4
503	0.613913	0.386087	1	0.794507	0.00666588	Forager	4	59
503	0.613913	0.386087	1	0.967901		Nestmate	4
504	0.613994	0.386006	1	0.79088	0.00362751	Forager	3	59
504	0.613994	0.386006	1	0.8752		Nestmate	3
505	0.618605	0.381395	1	0.583369	0.207511	Forager	2	59
505	0.618605	0.381395	1	0.892299		Nestmate	2
506	0.618724	0.381276	1	0.578032	0.00533655	Forager	2	59
506	0.618724	0.381276	1	0.897636		Nestmate	2
507	0.619403	0.380597	1	0.547487	0.0305456	Forager	2	59
507	0.619403	0.380597	1	0.928181		Nestmate	2
508	0.620753	0.379247	1	0.486736	0.0607506	Forager	1	59
508	0.620753	0.379247	1	0.724821		Nestmate	1
509	0.620834	0.379166	1	0.483058	0.00367802	Forager	2	59
509	0.620834	0.379166	1	0.931859		Nestmate	2
510	0.621261	0.378739	1	0.463857	0.0192013	Forager	3	59
510	0.621261	0.378739	1	0.894401		Nestmate	3
511	0.621468	0.378532	1	0.454556	0.00930106	Forager	4	59
511	0.621468	0.378532	1	0.977202		Nestmate	4
512	0.622704	0.377296	1	0.398932	0.0556238	Forager	5	59
512	0.622704	0.377296	1	0.930141		Nestmate	5
513	0.622713	0.377287	1	0.398518	0.000414309	Forager	4	59
513	0.622713	0.377287	1	0.977617		Nestmate	4
514	0.623043	0.376957	1	0.383674	0.0148441	Forager	3	59
514	0.623043	0.376957	1	0.909245		Nestmate	3
515	0.623224	0.376776	1	0.375531	0.00814237	Forager	2	59
515	0.623224	0.376776	1	0.940002		Nestmate	2
516	0.623235	0.376765	1	0.375024	0.000507251	Forager	1	59
516	0.623235	0.376765	1	0.725329		Nestmate	1
517	0.626501	0.373499	1	0.228047	0.146977	Forager	1	59
517	0.626501	0.373499	1	0.872306		Nestmate	1
519	0.62744	0.37256	1	0.95777	0.0422301	Forager	1	60
519	0.62744	0.37256	1	0.727174		Nestmate	1
520	0.627738	0.372262	1	0.944332	0.0134379	Forager	2	60
520	0.627738	0.372262	1	0.922683		Nestmate	2
521	0.627793	0.372207	1	0.941862	0.00246968	Forager	2	60
521	0.627793	0.372207	1	0.925153		Nestmate	2
522	0.627798	0.372202	1	0.94165	0.000212729	Forager	3	60
522	0.627798	0.372202	1	0.92842		Nestmate	3
523	0.627946	0.372054	1	0.934983	0.00666673	Forager	2	60
523	0.627946	0.372054	1	0.93182		Nestmate	2
524	0.628191	0.371809	1	0.923957	0.0110256	Forager	2	60
524	0.628191	0.371809	1	0.942845		Nestmate	2
525	0.628203	0.371797	1	0.923419	0.000538196	Forager	2	60
525	0.628203	0.371797	1	0.943384		Nestmate	2
526	0.628968	0.371032	1	0.888971	0.0344477	Forager	1	60
526	0.628968	0.371032	1	0.761622		Nestmate	1
528	0.62912	0.37088	1	0.993191	0.00680892	Forager	1	61
528	0.62912	0.37088	1	0.935229		Nestmate	1
529	0.629342	0.370658	1	0.983207	0.00998367	Forager	2	61
529	0.629342	0.370658	1	0.557307		Nestmate	2
530	0.630916	0.369084	1	0.912375	0.0708321	Forager	2	61
530	0.630916	0.369084	1	0.62814		Nestmate	2
531	0.630939	0.369061	1	0.911306	0.00106922	Forager	3	61
531	0.630939	0.369061	1	0.93121		Nestmate	3
532	0.632479	0.367521	1	0.842026	0.0692798	Forager	4	61
532	0.632479	0.367521	1	0.645711		Nestmate	4
533	0.632547	0.367453	1	0.838959	0.00306729	Forager	3	61
533	0.632547	0.367453	1	0.934278		Nestmate	3
534	0.633046	0.366954	1	0.816499	0.0224598	Forager	4	61
534	0.633046	0.366954	1	0.668171		Nestmate	4
535	0.633899	0.366101	1	0.778136	0.0383632	Forager	5	61
535	0.633899	0.366101	1	0.972235		Nestmate	5
536	0.635129	0.364871	1	0.722797	0.0553395	Forager	4	61
536	0.635129	0.364871	1	0.723511		Nestmate	4
537	0.635732	0.364268	1	0.695649	0.0271472	Forager	4	61
537	0.635732	0.364268	1	0.750658		Nestmate	4
538	0.635874	0.364126	1	0.689271	0.00637823	Forager	3	61
538	0.635874	0.364126	1	0.940656		Nestmate	3
539	0.635887	0.364113	1	0.688678	0.000592838	Forager	3	61
539	0.635887	0.364113	1	0.941249		Nestmate	3
540	0.636017	0.363983	1	0.682797	0.00588092	Forager	4	61
540	0.636017	0.363983	1	0.756539		Nestmate	4
541	0.636087	0.363913	1	0.679673	0.00312454	Forager	3	61
541	0.636087	0.363913	1	0.944373		Nestmate	3
542	0.64098	0.35902	1	0.459476	0.220197	Forager	2	61
542	0.64098	0.35902	1	0.848336		Nestmate	2
543	0.641471	0.358529	1	0.437374	0.0221018	Forager	3	61
543	0.641471	0.358529	1	0.966475		Nestmate	3
544	0.641564	0.358436	1	0.433213	0.00416163	Forager	4	61
544	0.641564	0.358436	1	0.7607		Nestmate	4
545	0.64157	0.35843	1	0.432943	0.000269766	Forager	3	61
545	0.64157	0.35843	1	0.966745		Nestmate	3
546	0.641574	0.358426	1	0.432761	0.000182305	Forager	3	61
546	0.641574	0.358426	1	0.966927		Nestmate	3
547	0.641691	0.358309	1	0.427469	0.0052914	Forager	2	61
547	0.641691	0.358309	1	0.853628		Nestmate	2
548	0.64193	0.35807	1	0.416734	0.0107348	Forager	2	61
548	0.64193	0.35807	1	0.864363		Nestmate	2
549	0.642297	0.357703	1	0.400232	0.0165022	Forager	2	61
549	0.642297	0.357703	1	0.880865		Nestmate	2
550	0.642437	0.357563	1	0.393924	0.00630769	Forager	1	61
550	0.642437	0.357563	1	0.941537		Nestmate	1
551	0.643401	0.356599	1	0.350527	0.0433977	Forager	2	61
551	0.643401	0.356599	1	0.924262		Nestmate	2
552	0.643705	0.356295	1	0.336841	0.0136861	Forager	2	61
552	0.643705	0.356295	1	0.937948		Nestmate	2
553	0.643828	0.356172	1	0.331339	0.00550216	Forager	2	61
553	0.643828	0.356172	1	0.943451		Nestmate	2
554	0.643952	0.356048	1	0.32573	0.005609	Forager	2	61
554	0.643952	0.356048	1	0.94906		Nestmate	2
555	0.644085	0.355915	1	0.31975	0.00597965	Forager	1	61
555	0.644085	0.355915	1	0.947516		Nestmate	1
557	0.64736	0.35264	1	0.85261	0.14739	Forager	1	62
557	0.64736	0.35264	1	0.14739		Nestmate	1
559	0.647371	0.352629	1	0.999549	0.000451091	Forager	1	63
559	0.647371	0.352629	1	0.812226		Nestmate	1
560	0.647685	0.352315	1	0.985392	0.0141573	Forager	2	63
560	0.647685	0.352315	1	0.755142		Nestmate	2
561	0.648071	0.351929	1	0.96803	0.0173613	Forager	2	63
561	0.648071	0.351929	1	0.772504		Nestmate	2
562	0.648509	0.351491	1	0.948326	0.0197039	Forager	3	63
562	0.648509	0.351491	1	0.781326		Nestmate	3
563	0.648536	0.351464	1	0.947108	0.00121849	Forager	4	63
563	0.648536	0.351464	1	0.911795		Nestmate	4
564	0.648647	0.351353	1	0.942119	0.00498908	Forager	5	63
564	0.648647	0.351353	1	0.906326		Nestmate	5
565	0.651448	0.348552	1	0.816066	0.126053	Forager	6	63
565	0.651448	0.348552	1	0.126053		Nestmate	6
566	0.651464	0.348536	1	0.81535	0.000715347	Forager	5	63
566	0.651464	0.348536	1	0.907041		Nestmate	5
567	0.653134	0.346866	1	0.740174	0.075176	Forager	6	63
567	0.653134	0.346866	1	0.201229		Nestmate	6
568	0.653143	0.346857	1	0.739781	0.000393804	Forager	5	63
568	0.653143	0.346857	1	0.907435		Nestmate	5
569	0.653262	0.346738	1	0.734416	0.00536481	Forager	6	63
569	0.653262	0.346738	1	0.206594		Nestmate	6
570	0.653565	0.346435	1	0.720819	0.0135966	Forager	7	63
570	0.653565	0.346435	1	0.495113		Nestmate	7
571	0.660056	0.339944	1	0.428711	0.292108	Forager	6	63
571	0.660056	0.339944	1	0.498702		Nestmate	6
572	0.664131	0.335869	1	0.245348	0.183363	Forager	7	63
572	0.664131	0.335869	1	0.678476		Nestmate	7
573	0.664134	0.335866	1	0.245211	0.000137259	Forager	8	63
573	0.664134	0.335866	1	0.972372		Nestmate	8
574	0.664336	0.335664	1	0.236095	0.00911591	Forager	8	63
574	0.664336	0.335664	1	0.981488		Nestmate	8
575	0.665304	0.334696	1	0.192528	0.0435663	Forager	7	63
575	0.665304	0.334696	1	0.722043		Nestmate	7
576	0.665612	0.334388	1	0.178662	0.0138668	Forager	7	63
576	0.665612	0.334388	1	0.73591		Nestmate	7
577	0.665628	0.334372	1	0.177952	0.000709268	Forager	6	63
577	0.665628	0.334372	1	0.499411		Nestmate	6
578	0.665875	0.334125	1	0.166869	0.0110832	Forager	5	63
578	0.665875	0.334125	1	0.918518		Nestmate	5
579	0.665954	0.334046	1	0.163278	0.00359101	Forager	4	63
579	0.665954	0.334046	1	0.915386		Nestmate	4
580	0.666529	0.333471	1	0.137415	0.0258632	Forager	3	63
580	0.666529	0.333471	1	0.807189		Nestmate	3
581	0.66674	0.33326	1	0.127925	0.00948979	Forager	4	63
581	0.66674	0.33326	1	0.924876		Nestmate	4
582	0.666745	0.333255	1	0.127677	0.000247923	Forager	4	63
582	0.666745	0.333255	1	0.925124		Nestmate	4
583	0.666754	0.333246	1	0.127293	0.000384685	Forager	4	63
583	0.666754	0.333246	1	0.925508		Nestmate	4
584	0.667668	0.332332	1	0.0861539	0.0411386	Forager	3	63
584	0.667668	0.332332	1	0.848328		Nestmate	3
585	0.667724	0.332276	1	0.0836202	0.00253373	Forager	4	63
585	0.667724	0.332276	1	0.928042		Nestmate	4
586	0.667864	0.332136	1	0.0773331	0.00628711	Forager	3	63
586	0.667864	0.332136	1	0.854615		Nestmate	3
587	0.668255	0.331745	1	0.0597366	0.0175964	Forager	2	63
587	0.668255	0.331745	1	0.7901		Nestmate	2
588	0.669583	0.330417	1	0	0.0597366	Forager	1	63
588	0.669583	0.330417	1	0.871962		Nestmate	1
591	0.669765	0.330235	1	0.991817	0.00818307	Forager	1	64
591	0.669765	0.330235	1	0.936225		Nestmate	1
592	0.669944	0.330056	1	0.983737	0.00807984	Forager	2	64
592	0.669944	0.330056	1	0.576897		Nestmate	2
593	0.669957	0.330043	1	0.983175	0.000561962	Forager	1	64
593	0.669957	0.330043	1	0.936787		Nestmate	1
594	0.67001	0.32999	1	0.98079	0.00238546	Forager	2	64
594	0.67001	0.32999	1	0.579282		Nestmate	2
595	0.672649	0.327351	1	0.862009	0.118781	Forager	3	64
595	0.672649	0.327351	1	0.92386		Nestmate	3
596	0.672683	0.327317	1	0.860502	0.00150707	Forager	3	64
596	0.672683	0.327317	1	0.925367		Nestmate	3
597	0.677135	0.322865	1	0.660145	0.200357	Forager	2	64
597	0.677135	0.322865	1	0.779639		Nestmate	2
598	0.67727	0.32273	1	0.654052	0.00609346	Forager	1	64
598	0.67727	0.32273	1	0.942881		Nestmate	1
599	0.677315	0.322685	1	0.652031	0.00202044	Forager	1	64
599	0.677315	0.322685	1	0.944901		Nestmate	1
600	0.677781	0.322219	1	0.631081	0.0209503	Forager	2	64
600	0.677781	0.322219	1	0.800589		Nestmate	2
601	0.677882	0.322118	1	0.626527	0.00455402	Forager	3	64
601	0.677882	0.322118	1	0.929921		Nestmate	3
602	0.677894	0.322106	1	0.625988	0.000539137	Forager	3	64
602	0.677894	0.322106	1	0.93046		Nestmate	3
603	0.678101	0.321899	1	0.616682	0.00930543	Forager	4	64
603	0.678101	0.321899	1	0.770006		Nestmate	4
604	0.678622	0.321378	1	0.593245	0.0234373	Forager	4	64
604	0.678622	0.321378	1	0.793443		Nestmate	4
605	0.678729	0.321271	1	0.588421	0.00482425	Forager	3	64
605	0.678729	0.321271	1	0.935284		Nestmate	3
606	0.679118	0.320882	1	0.570924	0.0174969	Forager	4	64
606	0.679118	0.320882	1	0.81094		Nestmate	4
607	0.679386	0.320614	1	0.558832	0.0120918	Forager	5	64
607	0.679386	0.320614	1	0.360628		Nestmate	5
608	0.679639	0.320361	1	0.547447	0.0113852	Forager	4	64
608	0.679639	0.320361	1	0.822325		Nestmate	4
609	0.682417	0.317583	1	0.42247	0.124977	Forager	5	64
609	0.682417	0.317583	1	0.485604		Nestmate	5
610	0.682708	0.317292	1	0.409353	0.0131177	Forager	4	64
610	0.682708	0.317292	1	0.835443		Nestmate	4
611	0.683067	0.316933	1	0.393224	0.0161288	Forager	4	64
611	0.683067	0.316933	1	0.851572		Nestmate	4
612	0.683378	0.316622	1	0.379233	0.0139907	Forager	5	64
612	0.683378	0.316622	1	0.499595		Nestmate	5
613	0.683462	0.316538	1	0.375417	0.00381666	Forager	6	64
613	0.683462	0.316538	1	0.720318		Nestmate	6
614	0.68653	0.31347	1	0.237352	0.138065	Forager	5	64
614	0.68653	0.31347	1	0.63766		Nestmate	5
615	0.687922	0.312078	1	0.17473	0.0626216	Forager	4	64
615	0.687922	0.312078	1	0.914193		Nestmate	4
616	0.687938	0.312062	1	0.173996	0.000734054	Forager	3	64
616	0.687938	0.312062	1	0.936018		Nestmate	3
617	0.688092	0.311908	1	0.167092	0.00690431	Forager	2	64
617	0.688092	0.311908	1	0.807494		Nestmate	2
618	0.68814	0.31186	1	0.164924	0.00216813	Forager	1	64
618	0.68814	0.31186	1	0.947069		Nestmate	1
619	0.689563	0.310437	1	0.100886	0.0640378	Forager	2	64
619	0.689563	0.310437	1	0.871531		Nestmate	2
620	0.690201	0.309799	1	0.0721988	0.0286872	Forager	2	64
620	0.690201	0.309799	1	0.900219		Nestmate	2
621	0.690776	0.309224	1	0.0462954	0.0259034	Forager	1	64
621	0.690776	0.309224	1	0.972973		Nestmate	1
623	0.691173	0.308827	1	0.982133	0.0178672	Forager	1	65
623	0.691173	0.308827	1	0.807967		Nestmate	1
624	0.691385	0.308615	1	0.972623	0.00950937	Forager	1	65
624	0.691385	0.308615	1	0.817477		Nestmate	1
626	0.691574	0.308426	1	0.991478	0.00852225	Forager	1	66
626	0.691574	0.308426	1	0.927041		Nestmate	1
628	0.692115	0.307885	1	0.975636	0.0243641	Forager	1	67
628	0.692115	0.307885	1	0.587887		Nestmate	1
630	0.692204	0.307796	1	0.996018	0.00398214	Forager	1	68
630	0.692204	0.307796	1	0.876288		Nestmate	1
631	0.69232	0.30768	1	0.990785	0.00523254	Forager	1	68
631	0.69232	0.30768	1	0.881521		Nestmate	1
632	0.692749	0.307251	1	0.97147	0.0193153	Forager	2	68
632	0.692749	0.307251	1	0.812531		Nestmate	2
633	0.693254	0.306746	1	0.948767	0.022703	Forager	3	68
633	0.693254	0.306746	1	0.61059		Nestmate	3
634	0.698435	0.301565	1	0.715614	0.233153	Forager	4	68
634	0.698435	0.301565	1	0.870812		Nestmate	4
635	0.699922	0.300078	1	0.6487	0.0669142	Forager	5	68
635	0.699922	0.300078	1	0.695998		Nestmate	5
636	0.701003	0.298997	1	0.60005	0.0486503	Forager	5	68
636	0.701003	0.298997	1	0.744648		Nestmate	5
637	0.701144	0.298856	1	0.59372	0.00632955	Forager	4	68
637	0.701144	0.298856	1	0.877142		Nestmate	4
638	0.702635	0.297365	1	0.526633	0.0670877	Forager	5	68
638	0.702635	0.297365	1	0.811736		Nestmate	5
639	0.703175	0.296825	1	0.502313	0.0243198	Forager	6	68
639	0.703175	0.296825	1	0.217369		Nestmate	6
640	0.703994	0.296006	1	0.465454	0.0368589	Forager	5	68
640	0.703994	0.296006	1	0.848595		Nestmate	5
641	0.705198	0.294802	1	0.411287	0.0541671	Forager	5	68
641	0.705198	0.294802	1	0.902762		Nestmate	5
642	0.705276	0.294724	1	0.407792	0.00349511	Forager	4	68
642	0.705276	0.294724	1	0.880637		Nestmate	4
643	0.705699	0.294301	1	0.388721	0.0190704	Forager	4	68
643	0.705699	0.294301	1	0.899708		Nestmate	4
644	0.705711	0.294289	1	0.388176	0.000545256	Forager	4	68
644	0.705711	0.294289	1	0.900253		Nestmate	4
645	0.707927	0.292073	1	0.288484	0.0996919	Forager	3	68
645	0.707927	0.292073	1	0.710282		Nestmate	3
646	0.71086	0.28914	1	0.156479	0.132005	Forager	3	68
646	0.71086	0.28914	1	0.842287		Nestmate	3
647	0.711613	0.288387	1	0.122582	0.033897	Forager	2	68
647	0.711613	0.288387	1	0.846428		Nestmate	2
648	0.711728	0.288272	1	0.117439	0.00514284	Forager	2	68
648	0.711728	0.288272	1	0.851571		Nestmate	2
649	0.711834	0.288166	1	0.112653	0.00478667	Forager	1	68
649	0.711834	0.288166	1	0.886307		Nestmate	1
651	0.712094	0.287906	1	0.988288	0.0117118	Forager	1	69
651	0.712094	0.287906	1	0.959228		Nestmate	1
652	0.712245	0.287755	1	0.981497	0.00679099	Forager	2	69
652	0.712245	0.287755	1	0.154181		Nestmate	2
653	0.722599	0.277401	1	0.515596	0.465901	Forager	3	69
653	0.722599	0.277401	1	0.708886		Nestmate	3
654	0.724468	0.275532	1	0.431459	0.0841373	Forager	3	69
654	0.724468	0.275532	1	0.793024		Nestmate	3
655	0.724859	0.275141	1	0.413873	0.0175851	Forager	3	69
655	0.724859	0.275141	1	0.810609		Nestmate	3
656	0.726484	0.273516	1	0.340754	0.073119	Forager	2	69
656	0.726484	0.273516	1	0.2273		Nestmate	2
657	0.726553	0.273447	1	0.337659	0.00309507	Forager	1	69
657	0.726553	0.273447	1	0.962323		Nestmate	1
658	0.729087	0.270913	1	0.223607	0.114053	Forager	2	69
658	0.729087	0.270913	1	0.341353		Nestmate	2
659	0.729214	0.270786	1	0.21792	0.00568648	Forager	2	69
659	0.729214	0.270786	1	0.347039		Nestmate	2
660	0.729274	0.270726	1	0.21519	0.00273056	Forager	1	69
660	0.729274	0.270726	1	0.965054		Nestmate	1
662	0.729355	0.270645	1	0.996391	0.00360906	Forager	1	70
662	0.729355	0.270645	1	0.821086		Nestmate	1
663	0.72955	0.27045	1	0.987598	0.00879339	Forager	2	70
663	0.72955	0.27045	1	0.412689		Nestmate	2
664	0.729771	0.270229	1	0.977649	0.00994863	Forager	3	70
664	0.729771	0.270229	1	0.912711		Nestmate	3
665	0.732222	0.267778	1	0.867358	0.110291	Forager	4	70
665	0.732222	0.267778	1	0.609702		Nestmate	4
666	0.732372	0.267628	1	0.860615	0.0067433	Forager	3	70
666	0.732372	0.267628	1	0.919454		Nestmate	3
667	0.732998	0.267002	1	0.832424	0.0281912	Forager	4	70
667	0.732998	0.267002	1	0.637893		Nestmate	4
668	0.733705	0.266295	1	0.800607	0.0318166	Forager	5	70
668	0.733705	0.266295	1	0.219263		Nestmate	5
669	0.734569	0.265431	1	0.76176	0.0388474	Forager	6	70
669	0.734569	0.265431	1	0.317358		Nestmate	6
670	0.735866	0.264134	1	0.703367	0.0583923	Forager	5	70
670	0.735866	0.264134	1	0.277655		Nestmate	5
671	0.740558	0.259442	1	0.492222	0.211145	Forager	5	70
671	0.740558	0.259442	1	0.4888		Nestmate	5
672	0.748319	0.251681	1	0.14299	0.349233	Forager	6	70
672	0.748319	0.251681	1	0.666591		Nestmate	6
673	0.748396	0.251604	1	0.139533	0.00345702	Forager	7	70
673	0.748396	0.251604	1	0.952517		Nestmate	7
674	0.748966	0.251034	1	0.113892	0.0256406	Forager	6	70
674	0.748966	0.251034	1	0.692232		Nestmate	6
675	0.749149	0.250851	1	0.105662	0.00823018	Forager	6	70
675	0.749149	0.250851	1	0.700462		Nestmate	6
676	0.749866	0.250134	1	0.0733593	0.0323025	Forager	6	70
676	0.749866	0.250134	1	0.732764		Nestmate	6
677	0.750833	0.249167	1	0.0298435	0.0435157	Forager	5	70
677	0.750833	0.249167	1	0.532316		Nestmate	5
678	0.751497	0.248503	1	0	0.0298435	Forager	4	70
678	0.751497	0.248503	1	0.667737		Nestmate	4
688	0.751505	0.248495	1	0.999622	0.000378322	Forager	1	71
688	0.751505	0.248495	1	0.720697		Nestmate	1
690	0.754024	0.245976	1	0.886637	0.113363	Forager	1	72
690	0.754024	0.245976	1	0.50092		Nestmate	1
691	0.755333	0.244667	1	0.827725	0.0589114	Forager	1	72
691	0.755333	0.244667	1	0.559832		Nestmate	1
692	0.759079	0.240921	1	0.659191	0.168534	Forager	2	72
692	0.759079	0.240921	1	0.725386		Nestmate	2
693	0.759337	0.240663	1	0.647545	0.011646	Forager	2	72
693	0.759337	0.240663	1	0.737032		Nestmate	2
694	0.761611	0.238389	1	0.545235	0.10231	Forager	3	72
694	0.761611	0.238389	1	0.10231		Nestmate	3
695	0.761655	0.238345	1	0.543272	0.0019628	Forager	4	72
695	0.761655	0.238345	1	0.945346		Nestmate	4
696	0.76225	0.23775	1	0.516494	0.0267777	Forager	5	72
696	0.76225	0.23775	1	0.927031		Nestmate	5
697	0.762594	0.237406	1	0.50099	0.0155039	Forager	4	72
697	0.762594	0.237406	1	0.96085		Nestmate	4
698	0.763151	0.236849	1	0.475924	0.0250664	Forager	3	72
698	0.763151	0.236849	1	0.127377		Nestmate	3
699	0.76568	0.23432	1	0.362103	0.11382	Forager	3	72
699	0.76568	0.23432	1	0.241197		Nestmate	3
700	0.767166	0.232834	1	0.295243	0.0668601	Forager	3	72
700	0.767166	0.232834	1	0.308057		Nestmate	3
701	0.767221	0.232779	1	0.292796	0.00244695	Forager	4	72
701	0.767221	0.232779	1	0.963297		Nestmate	4
702	0.768133	0.231867	1	0.251754	0.0410419	Forager	3	72
702	0.768133	0.231867	1	0.349099		Nestmate	3
703	0.769819	0.230181	1	0.17587	0.0758847	Forager	3	72
703	0.769819	0.230181	1	0.424984		Nestmate	3
704	0.770718	0.229282	1	0.135415	0.040455	Forager	2	72
704	0.770718	0.229282	1	0.777487		Nestmate	2
705	0.770914	0.229086	1	0.126607	0.0088073	Forager	1	72
705	0.770914	0.229086	1	0.568639		Nestmate	1
707	0.774398	0.225602	1	0.843204	0.156796	Forager	1	73
707	0.774398	0.225602	1	0.374166		Nestmate	1
708	0.777826	0.222174	1	0.688944	0.154259	Forager	1	73
708	0.777826	0.222174	1	0.528425		Nestmate	1
710	0.777961	0.222039	1	0.993926	0.00607355	Forager	1	74
710	0.777961	0.222039	1	0.929686		Nestmate	1
711	0.778908	0.221092	1	0.951299	0.0426279	Forager	1	74
711	0.778908	0.221092	1	0.972314		Nestmate	1
712	0.779516	0.220484	1	0.923938	0.0273609	Forager	2	74
712	0.779516	0.220484	1	0.83797		Nestmate	2
713	0.779687	0.220313	1	0.916257	0.00768059	Forager	2	74
713	0.779687	0.220313	1	0.84565		Nestmate	2
714	0.7798	0.2202	1	0.91118	0.00507755	Forager	1	74
714	0.7798	0.2202	1	0.977392		Nestmate	1
716	0.780957	0.219043	1	0.947919	0.0520814	Forager	1	75
716	0.780957	0.219043	1	0.414246		Nestmate	1
718	0.782739	0.217261	1	0.919831	0.0801692	Forager	1	76
718	0.782739	0.217261	1	0.816079		Nestmate	1
720	0.782791	0.217209	1	0.997628	0.00237216	Forager	1	77
720	0.782791	0.217209	1	0.969299		Nestmate	1
722	0.783639	0.216361	1	0.961877	0.0381228	Forager	1	78
722	0.783639	0.216361	1	0.629589		Nestmate	1
723	0.783963	0.216037	1	0.947301	0.0145759	Forager	2	78
723	0.783963	0.216037	1	0.93403		Nestmate	2
724	0.786104	0.213896	1	0.850919	0.0963822	Forager	3	78
724	0.786104	0.213896	1	0.938669		Nestmate	3
725	0.789581	0.210419	1	0.69449	0.156429	Forager	4	78
725	0.789581	0.210419	1	0.569118		Nestmate	4
726	0.790027	0.209973	1	0.674398	0.0200927	Forager	3	78
726	0.790027	0.209973	1	0.958762		Nestmate	3
727	0.790069	0.209931	1	0.672515	0.00188233	Forager	3	78
727	0.790069	0.209931	1	0.960644		Nestmate	3
728	0.790145	0.209855	1	0.669075	0.00344088	Forager	2	78
728	0.790145	0.209855	1	0.937471		Nestmate	2
729	0.790241	0.209759	1	0.664754	0.00432097	Forager	2	78
729	0.790241	0.209759	1	0.941792		Nestmate	2
730	0.790344	0.209656	1	0.660124	0.00462918	Forager	3	78
730	0.790344	0.209656	1	0.965273		Nestmate	3
731	0.790354	0.209646	1	0.659688	0.00043672	Forager	3	78
731	0.790354	0.209646	1	0.96571		Nestmate	3
732	0.790486	0.209514	1	0.653747	0.00594051	Forager	2	78
732	0.790486	0.209514	1	0.947732		Nestmate	2
733	0.790496	0.209504	1	0.653312	0.000434747	Forager	3	78
733	0.790496	0.209504	1	0.966144		Nestmate	3
734	0.790639	0.209361	1	0.646871	0.00644143	Forager	4	78
734	0.790639	0.209361	1	0.575559		Nestmate	4
735	0.790698	0.209302	1	0.644198	0.00267311	Forager	5	78
735	0.790698	0.209302	1	0.990649		Nestmate	5
736	0.79189	0.20811	1	0.590559	0.0536392	Forager	6	78
736	0.79189	0.20811	1	0.622278		Nestmate	6
737	0.791924	0.208076	1	0.589051	0.00150766	Forager	7	78
737	0.791924	0.208076	1	0.887815		Nestmate	7
738	0.793498	0.206502	1	0.518205	0.0708462	Forager	6	78
738	0.793498	0.206502	1	0.693125		Nestmate	6
739	0.793635	0.206365	1	0.512038	0.00616694	Forager	7	78
739	0.793635	0.206365	1	0.893982		Nestmate	7
740	0.793676	0.206324	1	0.510206	0.00183219	Forager	6	78
740	0.793676	0.206324	1	0.694957		Nestmate	6
741	0.793995	0.206005	1	0.495853	0.0143529	Forager	7	78
741	0.793995	0.206005	1	0.908335		Nestmate	7
742	0.794017	0.205983	1	0.494858	0.000995236	Forager	8	78
742	0.794017	0.205983	1	0.964292		Nestmate	8
743	0.794331	0.205669	1	0.480735	0.0141224	Forager	7	78
743	0.794331	0.205669	1	0.922457		Nestmate	7
744	0.797417	0.202583	1	0.341872	0.138863	Forager	6	78
744	0.797417	0.202583	1	0.83382		Nestmate	6
745	0.797438	0.202562	1	0.340898	0.000974529	Forager	5	78
745	0.797438	0.202562	1	0.991624		Nestmate	5
746	0.797605	0.202395	1	0.333413	0.00748519	Forager	4	78
746	0.797605	0.202395	1	0.583044		Nestmate	4
747	0.797633	0.202367	1	0.332153	0.0012599	Forager	3	78
747	0.797633	0.202367	1	0.967404		Nestmate	3
748	0.797677	0.202323	1	0.330161	0.00199198	Forager	4	78
748	0.797677	0.202323	1	0.585036		Nestmate	4
749	0.797736	0.202264	1	0.327486	0.00267497	Forager	3	78
749	0.797736	0.202264	1	0.970079		Nestmate	3
750	0.797814	0.202186	1	0.323976	0.00351002	Forager	3	78
750	0.797814	0.202186	1	0.973589		Nestmate	3
751	0.797916	0.202084	1	0.319382	0.00459355	Forager	3	78
751	0.797916	0.202084	1	0.978183		Nestmate	3
752	0.79814	0.20186	1	0.30933	0.0100526	Forager	3	78
752	0.79814	0.20186	1	0.988236		Nestmate	3
753	0.798185	0.201815	1	0.307291	0.00203865	Forager	2	78
753	0.798185	0.201815	1	0.949771		Nestmate	2
754	0.799727	0.200273	1	0.237923	0.0693684	Forager	1	78
754	0.799727	0.200273	1	0.698957		Nestmate	1
756	0.799822	0.200178	1	0.995714	0.00428568	Forager	1	79
756	0.799822	0.200178	1	0.931316		Nestmate	1
757	0.80074	0.19926	1	0.954388	0.0413266	Forager	2	79
757	0.80074	0.19926	1	0.95552		Nestmate	2
758	0.80078	0.19922	1	0.952588	0.00179993	Forager	1	79
758	0.80078	0.19922	1	0.933116		Nestmate	1
759	0.800846	0.199154	1	0.949638	0.00294959	Forager	2	79
759	0.800846	0.199154	1	0.95847		Nestmate	2
760	0.800859	0.199141	1	0.94904	0.000598138	Forager	1	79
760	0.800859	0.199141	1	0.933714		Nestmate	1
761	0.800925	0.199075	1	0.946057	0.00298263	Forager	1	79
761	0.800925	0.199075	1	0.936697		Nestmate	1
762	0.801308	0.198692	1	0.928853	0.0172046	Forager	2	79
762	0.801308	0.198692	1	0.975674		Nestmate	2
763	0.801357	0.198643	1	0.92663	0.00222315	Forager	2	79
763	0.801357	0.198643	1	0.977897		Nestmate	2
764	0.802469	0.197531	1	0.87658	0.0500496	Forager	3	79
764	0.802469	0.197531	1	0.428797		Nestmate	3
765	0.803878	0.196122	1	0.813174	0.0634059	Forager	4	79
765	0.803878	0.196122	1	0.884492		Nestmate	4
766	0.806478	0.193522	1	0.696174	0.117	Forager	3	79
766	0.806478	0.193522	1	0.545798		Nestmate	3
767	0.807768	0.192232	1	0.638121	0.0580524	Forager	4	79
767	0.807768	0.192232	1	0.942544		Nestmate	4
768	0.807783	0.192217	1	0.637471	0.000650277	Forager	3	79
768	0.807783	0.192217	1	0.546448		Nestmate	3
769	0.808005	0.191995	1	0.627487	0.00998385	Forager	4	79
769	0.808005	0.191995	1	0.952528		Nestmate	4
770	0.811485	0.188515	1	0.470873	0.156614	Forager	3	79
770	0.811485	0.188515	1	0.703062		Nestmate	3
771	0.81238	0.18762	1	0.430582	0.0402915	Forager	3	79
771	0.81238	0.18762	1	0.743353		Nestmate	3
772	0.813326	0.186674	1	0.388047	0.042535	Forager	3	79
772	0.813326	0.186674	1	0.785888		Nestmate	3
773	0.813493	0.186507	1	0.380497	0.00754926	Forager	2	79
773	0.813493	0.186507	1	0.985447		Nestmate	2
774	0.813513	0.186487	1	0.379608	0.000889243	Forager	2	79
774	0.813513	0.186487	1	0.986336		Nestmate	2
775	0.813525	0.186475	1	0.379079	0.00052937	Forager	2	79
775	0.813525	0.186475	1	0.986865		Nestmate	2
776	0.813525	0.186475	1	0.379055	2.39307e-05	Forager	2	79
776	0.813525	0.186475	1	0.986889		Nestmate	2
777	0.813698	0.186302	1	0.371287	0.00776794	Forager	1	79
777	0.813698	0.186302	1	0.944465		Nestmate	1
778	0.814114	0.185886	1	0.352564	0.0187231	Forager	1	79
778	0.814114	0.185886	1	0.963188		Nestmate	1
780	0.814662	0.185338	1	0.975342	0.0246581	Forager	1	80
780	0.814662	0.185338	1	0.745355		Nestmate	1
782	0.814977	0.185023	1	0.985831	0.0141689	Forager	1	81
782	0.814977	0.185023	1	0.502257		Nestmate	1
783	0.815327	0.184673	1	0.970063	0.0157681	Forager	2	81
783	0.815327	0.184673	1	0.867339		Nestmate	2
784	0.815391	0.184609	1	0.967206	0.00285664	Forager	3	81
784	0.815391	0.184609	1	0.904678		Nestmate	3
785	0.815536	0.184464	1	0.960659	0.00654697	Forager	4	81
785	0.815536	0.184464	1	0.784034		Nestmate	4
786	0.816687	0.183313	1	0.908868	0.0517911	Forager	4	81
786	0.816687	0.183313	1	0.835825		Nestmate	4
787	0.817406	0.182594	1	0.876508	0.0323605	Forager	5	81
787	0.817406	0.182594	1	0.904323		Nestmate	5
788	0.817871	0.182129	1	0.855596	0.0209122	Forager	6	81
788	0.817871	0.182129	1	0.953778		Nestmate	6
789	0.818163	0.181837	1	0.842459	0.0131362	Forager	7	81
789	0.818163	0.181837	1	0.953147		Nestmate	7
790	0.818192	0.181808	1	0.841153	0.00130648	Forager	7	81
790	0.818192	0.181808	1	0.954453		Nestmate	7
791	0.81877	0.18123	1	0.815117	0.0260354	Forager	8	81
791	0.81877	0.18123	1	0.693772		Nestmate	8
792	0.818788	0.181212	1	0.814313	0.000804821	Forager	9	81
792	0.818788	0.181212	1	0.982293		Nestmate	9
793	0.820226	0.179774	1	0.749615	0.0646977	Forager	8	81
793	0.820226	0.179774	1	0.75847		Nestmate	8
794	0.82029	0.17971	1	0.746751	0.00286364	Forager	9	81
794	0.82029	0.17971	1	0.985157		Nestmate	9
795	0.821794	0.178206	1	0.679062	0.067689	Forager	8	81
795	0.821794	0.178206	1	0.826159		Nestmate	8
796	0.822416	0.177584	1	0.651091	0.0279709	Forager	7	81
796	0.822416	0.177584	1	0.982424		Nestmate	7
797	0.822513	0.177487	1	0.646703	0.00438869	Forager	8	81
797	0.822513	0.177487	1	0.830547		Nestmate	8
798	0.822819	0.177181	1	0.632923	0.0137797	Forager	8	81
798	0.822819	0.177181	1	0.844327		Nestmate	8
799	0.822866	0.177134	1	0.630821	0.00210188	Forager	9	81
799	0.822866	0.177134	1	0.987259		Nestmate	9
800	0.823308	0.176692	1	0.610935	0.0198855	Forager	10	81
800	0.823308	0.176692	1	0.76524		Nestmate	10
801	0.824744	0.175256	1	0.5463	0.0646354	Forager	11	81
801	0.824744	0.175256	1	0.596951		Nestmate	11
802	0.825938	0.174062	1	0.492598	0.0537025	Forager	12	81
802	0.825938	0.174062	1	0.177077		Nestmate	12
803	0.826315	0.173685	1	0.47563	0.0169673	Forager	11	81
803	0.826315	0.173685	1	0.613918		Nestmate	11
804	0.832401	0.167599	1	0.201744	0.273886	Forager	12	81
804	0.832401	0.167599	1	0.450963		Nestmate	12
805	0.832401	0.167599	1	0.201739	5.52162e-06	Forager	13	81
805	0.832401	0.167599	1	0.977622		Nestmate	13
806	0.83324	0.16676	1	0.163991	0.0377482	Forager	12	81
806	0.83324	0.16676	1	0.488712		Nestmate	12
807	0.833323	0.166677	1	0.160247	0.00374307	Forager	11	81
807	0.833323	0.166677	1	0.617661		Nestmate	11
808	0.834463	0.165537	1	0.10897	0.0512778	Forager	11	81
808	0.834463	0.165537	1	0.668939		Nestmate	11
809	0.83535	0.16465	1	0.0690303	0.0399394	Forager	10	81
809	0.83535	0.16465	1	0.80518		Nestmate	10
810	0.83587	0.16413	1	0.0456553	0.023375	Forager	10	81
810	0.83587	0.16413	1	0.828555		Nestmate	10
811	0.835895	0.164105	1	0.0445236	0.00113169	Forager	9	81
811	0.835895	0.164105	1	0.98839		Nestmate	9
812	0.836403	0.163597	1	0.0216514	0.0228722	Forager	8	81
812	0.836403	0.163597	1	0.867199		Nestmate	8
813	0.836435	0.163565	1	0.0201957	0.00145572	Forager	7	81
813	0.836435	0.163565	1	0.98388		Nestmate	7
814	0.836466	0.163534	1	0.0187993	0.00139636	Forager	6	81
814	0.836466	0.163534	1	0.955174		Nestmate	6
815	0.83647	0.16353	1	0.0186515	0.000147898	Forager	7	81
815	0.83647	0.16353	1	0.984028		Nestmate	7
816	0.836884	0.163116	1	0	0.0186515	Forager	6	81
816	0.836884	0.163116	1	0.973826		Nestmate	6
848	0.849806	0.150194	1	0.418499	0.581501	Forager	1	82
848	0.849806	0.150194	1	0.995748		Nestmate	1
849	0.849832	0.150168	1	0.417366	0.00113278	Forager	1	82
849	0.849832	0.150168	1	0.99688		Nestmate	1
851	0.849913	0.150087	1	0.996318	0.00368208	Forager	1	83
851	0.849913	0.150087	1	0.968736		Nestmate	1
852	0.849939	0.150061	1	0.995186	0.00113182	Forager	2	83
852	0.849939	0.150061	1	0.829686		Nestmate	2
853	0.849997	0.150003	1	0.99258	0.00260584	Forager	3	83
853	0.849997	0.150003	1	0.788494		Nestmate	3
854	0.850553	0.149447	1	0.967533	0.0250471	Forager	3	83
854	0.850553	0.149447	1	0.813541		Nestmate	3
855	0.851939	0.148061	1	0.905156	0.0623773	Forager	4	83
855	0.851939	0.148061	1	0.795142		Nestmate	4
856	0.852079	0.147921	1	0.898849	0.00630685	Forager	5	83
856	0.852079	0.147921	1	0.910984		Nestmate	5
857	0.852241	0.147759	1	0.891576	0.0072734	Forager	6	83
857	0.852241	0.147759	1	0.432257		Nestmate	6
858	0.852365	0.147635	1	0.886001	0.00557498	Forager	5	83
858	0.852365	0.147635	1	0.916559		Nestmate	5
859	0.852393	0.147607	1	0.88476	0.00124049	Forager	5	83
859	0.852393	0.147607	1	0.9178		Nestmate	5
860	0.853039	0.146961	1	0.855653	0.0291071	Forager	6	83
860	0.853039	0.146961	1	0.461364		Nestmate	6
861	0.853777	0.146223	1	0.822448	0.0332055	Forager	6	83
861	0.853777	0.146223	1	0.49457		Nestmate	6
862	0.859799	0.140201	1	0.551447	0.271001	Forager	6	83
862	0.859799	0.140201	1	0.765571		Nestmate	6
863	0.860036	0.139964	1	0.540806	0.010641	Forager	5	83
863	0.860036	0.139964	1	0.928441		Nestmate	5
864	0.860174	0.139826	1	0.534589	0.0062165	Forager	5	83
864	0.860174	0.139826	1	0.934657		Nestmate	5
865	0.860186	0.139814	1	0.534057	0.000531811	Forager	6	83
865	0.860186	0.139814	1	0.766103		Nestmate	6
866	0.860221	0.139779	1	0.532471	0.00158602	Forager	7	83
866	0.860221	0.139779	1	0.988475		Nestmate	7
867	0.860236	0.139764	1	0.53181	0.000661631	Forager	7	83
867	0.860236	0.139764	1	0.989137		Nestmate	7
868	0.860248	0.139752	1	0.531253	0.000556395	Forager	8	83
868	0.860248	0.139752	1	0.984584		Nestmate	8
869	0.860328	0.139672	1	0.527644	0.00360922	Forager	8	83
869	0.860328	0.139672	1	0.988193		Nestmate	8
870	0.860397	0.139603	1	0.524574	0.00307009	Forager	7	83
870	0.860397	0.139603	1	0.992207		Nestmate	7
871	0.860538	0.139462	1	0.518205	0.006369	Forager	8	83
871	0.860538	0.139462	1	0.994562		Nestmate	8
872	0.860614	0.139386	1	0.514782	0.00342301	Forager	9	83
872	0.860614	0.139386	1	0.991813		Nestmate	9
873	0.862329	0.137671	1	0.437605	0.0771768	Forager	10	83
873	0.862329	0.137671	1	0.579433		Nestmate	10
874	0.862347	0.137653	1	0.436829	0.000775699	Forager	9	83
874	0.862347	0.137653	1	0.992589		Nestmate	9
875	0.862389	0.137611	1	0.43491	0.00191902	Forager	9	83
875	0.862389	0.137611	1	0.994508		Nestmate	9
876	0.862402	0.137598	1	0.434322	0.000588253	Forager	9	83
876	0.862402	0.137598	1	0.995096		Nestmate	9
877	0.862411	0.137589	1	0.433923	0.000399005	Forager	9	83
877	0.862411	0.137589	1	0.995495		Nestmate	9
878	0.862424	0.137576	1	0.43335	0.000573581	Forager	8	83
878	0.862424	0.137576	1	0.995136		Nestmate	8
879	0.862473	0.137527	1	0.431126	0.00222325	Forager	7	83
879	0.862473	0.137527	1	0.99443		Nestmate	7
880	0.862525	0.137475	1	0.428818	0.002308	Forager	8	83
880	0.862525	0.137475	1	0.997444		Nestmate	8
881	0.862529	0.137471	1	0.428626	0.000192229	Forager	8	83
881	0.862529	0.137471	1	0.997636		Nestmate	8
882	0.862534	0.137466	1	0.428375	0.000250572	Forager	7	83
882	0.862534	0.137466	1	0.994681		Nestmate	7
883	0.864213	0.135787	1	0.352855	0.0755207	Forager	6	83
883	0.864213	0.135787	1	0.841624		Nestmate	6
884	0.864453	0.135547	1	0.342029	0.0108262	Forager	5	83
884	0.864453	0.135547	1	0.945484		Nestmate	5
885	0.864492	0.135508	1	0.340297	0.00173124	Forager	5	83
885	0.864492	0.135508	1	0.947215		Nestmate	5
886	0.864854	0.135146	1	0.323994	0.0163031	Forager	4	83
886	0.864854	0.135146	1	0.811445		Nestmate	4
887	0.865228	0.134772	1	0.307147	0.0168469	Forager	4	83
887	0.865228	0.134772	1	0.828292		Nestmate	4
888	0.865659	0.134341	1	0.287772	0.0193752	Forager	3	83
888	0.865659	0.134341	1	0.832916		Nestmate	3
889	0.865769	0.134231	1	0.2828	0.00497235	Forager	2	83
889	0.865769	0.134231	1	0.834659		Nestmate	2
890	0.866039	0.133961	1	0.270662	0.0121372	Forager	1	83
890	0.866039	0.133961	1	0.980873		Nestmate	1
891	0.866084	0.133916	1	0.268653	0.00200939	Forager	1	83
891	0.866084	0.133916	1	0.982882		Nestmate	1
892	0.866737	0.133263	1	0.239279	0.0293737	Forager	2	83
892	0.866737	0.133263	1	0.864032		Nestmate	2
893	0.867738	0.132262	1	0.194211	0.0450681	Forager	3	83
893	0.867738	0.132262	1	0.877985		Nestmate	3
894	0.867865	0.132135	1	0.188501	0.00571005	Forager	4	83
894	0.867865	0.132135	1	0.834002		Nestmate	4
895	0.867882	0.132118	1	0.187719	0.000781783	Forager	5	83
895	0.867882	0.132118	1	0.947997		Nestmate	5
896	0.869783	0.130217	1	0.102177	0.0855425	Forager	6	83
896	0.869783	0.130217	1	0.927166		Nestmate	6
897	0.869791	0.130209	1	0.101829	0.000348246	Forager	7	83
897	0.869791	0.130209	1	0.995029		Nestmate	7
898	0.869796	0.130204	1	0.10159	0.00023857	Forager	6	83
898	0.869796	0.130204	1	0.927405		Nestmate	6
899	0.870055	0.129945	1	0.0899449	0.0116452	Forager	5	83
899	0.870055	0.129945	1	0.959642		Nestmate	5
900	0.871007	0.128993	1	0.047114	0.0428309	Forager	4	83
900	0.871007	0.128993	1	0.876833		Nestmate	4
901	0.871042	0.128958	1	0.0455248	0.00158918	Forager	4	83
901	0.871042	0.128958	1	0.878422		Nestmate	4
902	0.871704	0.128296	1	0.0157395	0.0297853	Forager	4	83
902	0.871704	0.128296	1	0.908207		Nestmate	4
903	0.872054	0.127946	1	0	0.0157395	Forager	3	83
903	0.872054	0.127946	1	0.893724		Nestmate	3
922	0.872394	0.127606	1	0.984687	0.0153133	Forager	1	84
922	0.872394	0.127606	1	0.951331		Nestmate	1
924	0.872433	0.127567	1	0.998269	0.00173134	Forager	1	85
924	0.872433	0.127567	1	0.974704		Nestmate	1
926	0.872452	0.127548	1	0.999109	0.000891256	Forager	1	86
926	0.872452	0.127548	1	0.998528		Nestmate	1
927	0.872574	0.127426	1	0.993632	0.00547643	Forager	2	86
927	0.872574	0.127426	1	0.993712		Nestmate	2
928	0.87258	0.12742	1	0.99338	0.000252306	Forager	2	86
928	0.87258	0.12742	1	0.993964		Nestmate	2
929	0.872899	0.127101	1	0.979006	0.0143736	Forager	3	86
929	0.872899	0.127101	1	0.868988		Nestmate	3
930	0.872926	0.127074	1	0.977777	0.00122895	Forager	4	86
930	0.872926	0.127074	1	0.953746		Nestmate	4
931	0.873447	0.126553	1	0.95435	0.0234272	Forager	3	86
931	0.873447	0.126553	1	0.892416		Nestmate	3
932	0.873504	0.126496	1	0.9518	0.00255037	Forager	4	86
932	0.873504	0.126496	1	0.956296		Nestmate	4
933	0.87447	0.12553	1	0.908331	0.0434693	Forager	3	86
933	0.87447	0.12553	1	0.935885		Nestmate	3
934	0.874526	0.125474	1	0.90579	0.00254043	Forager	2	86
934	0.874526	0.125474	1	0.996505		Nestmate	2
935	0.874534	0.125466	1	0.905433	0.00035678	Forager	1	86
935	0.874534	0.125466	1	0.998884		Nestmate	1
937	0.874537	0.125463	1	0.99986	0.000140217	Forager	1	87
937	0.874537	0.125463	1	0.995636		Nestmate	1
938	0.874611	0.125389	1	0.996553	0.00330722	Forager	2	87
938	0.874611	0.125389	1	0.962949		Nestmate	2
939	0.874649	0.125351	1	0.994825	0.00172716	Forager	2	87
939	0.874649	0.125351	1	0.964676		Nestmate	2
940	0.875656	0.124344	1	0.949493	0.0453328	Forager	3	87
940	0.875656	0.124344	1	0.939057		Nestmate	3
941	0.875982	0.124018	1	0.934834	0.0146587	Forager	3	87
941	0.875982	0.124018	1	0.953716		Nestmate	3
942	0.876195	0.123805	1	0.92528	0.00955434	Forager	4	87
942	0.876195	0.123805	1	0.909773		Nestmate	4
943	0.876608	0.123392	1	0.90666	0.0186192	Forager	3	87
943	0.876608	0.123392	1	0.972335		Nestmate	3
944	0.87675	0.12325	1	0.900299	0.00636088	Forager	4	87
944	0.87675	0.12325	1	0.916134		Nestmate	4
945	0.877824	0.122176	1	0.851959	0.0483405	Forager	5	87
945	0.877824	0.122176	1	0.86697		Nestmate	5
946	0.877839	0.122161	1	0.851278	0.000681272	Forager	6	87
946	0.877839	0.122161	1	0.585718		Nestmate	6
947	0.878129	0.121871	1	0.838249	0.0130287	Forager	7	87
947	0.878129	0.121871	1	0.969325		Nestmate	7
948	0.87816	0.12184	1	0.836815	0.00143366	Forager	8	87
948	0.87816	0.12184	1	0.965726		Nestmate	8
949	0.87836	0.12164	1	0.827846	0.00896955	Forager	9	87
949	0.87836	0.12164	1	0.991852		Nestmate	9
950	0.878463	0.121537	1	0.823196	0.00464965	Forager	10	87
950	0.878463	0.121537	1	0.982041		Nestmate	10
951	0.878565	0.121435	1	0.81863	0.00456589	Forager	10	87
951	0.878565	0.121435	1	0.986607		Nestmate	10
952	0.878838	0.121162	1	0.806338	0.012292	Forager	11	87
952	0.878838	0.121162	1	0.963623		Nestmate	11
953	0.878844	0.121156	1	0.806049	0.00028927	Forager	10	87
953	0.878844	0.121156	1	0.986897		Nestmate	10
954	0.878877	0.121123	1	0.804591	0.00145847	Forager	11	87
954	0.878877	0.121123	1	0.965082		Nestmate	11
955	0.879126	0.120874	1	0.793365	0.0112259	Forager	12	87
955	0.879126	0.120874	1	0.98593		Nestmate	12
956	0.879299	0.120701	1	0.785569	0.00779547	Forager	11	87
956	0.879299	0.120701	1	0.972877		Nestmate	11
957	0.879337	0.120663	1	0.783861	0.0017085	Forager	12	87
957	0.879337	0.120663	1	0.987638		Nestmate	12
958	0.879752	0.120248	1	0.765213	0.0186481	Forager	13	87
958	0.879752	0.120248	1	0.922971		Nestmate	13
959	0.880372	0.119628	1	0.737296	0.0279169	Forager	13	87
959	0.880372	0.119628	1	0.950888		Nestmate	13
960	0.880409	0.119591	1	0.735633	0.0016631	Forager	14	87
960	0.880409	0.119591	1	0.979285		Nestmate	14
961	0.880424	0.119576	1	0.734938	0.000694697	Forager	14	87
961	0.880424	0.119576	1	0.97998		Nestmate	14
962	0.880468	0.119532	1	0.732992	0.00194576	Forager	15	87
962	0.880468	0.119532	1	0.928986		Nestmate	15
963	0.880498	0.119502	1	0.731626	0.00136652	Forager	14	87
963	0.880498	0.119502	1	0.981346		Nestmate	14
964	0.880547	0.119453	1	0.729426	0.00219941	Forager	14	87
964	0.880547	0.119453	1	0.983546		Nestmate	14
965	0.880589	0.119411	1	0.727513	0.00191345	Forager	13	87
965	0.880589	0.119411	1	0.952801		Nestmate	13
966	0.880673	0.119327	1	0.723746	0.00376651	Forager	14	87
966	0.880673	0.119327	1	0.987312		Nestmate	14
967	0.880702	0.119298	1	0.722449	0.00129698	Forager	13	87
967	0.880702	0.119298	1	0.954098		Nestmate	13
968	0.880813	0.119187	1	0.717457	0.00499184	Forager	14	87
968	0.880813	0.119187	1	0.992304		Nestmate	14
969	0.880815	0.119185	1	0.717379	7.87813e-05	Forager	14	87
969	0.880815	0.119185	1	0.992383		Nestmate	14
970	0.88097	0.11903	1	0.710369	0.00700957	Forager	15	87
970	0.88097	0.11903	1	0.935996		Nestmate	15
971	0.881897	0.118103	1	0.668678	0.0416915	Forager	16	87
971	0.881897	0.118103	1	0.530403		Nestmate	16
972	0.881946	0.118054	1	0.666458	0.00221962	Forager	17	87
972	0.881946	0.118054	1	0.929624		Nestmate	17
973	0.883614	0.116386	1	0.591409	0.0750491	Forager	16	87
973	0.883614	0.116386	1	0.605452		Nestmate	16
974	0.885985	0.114015	1	0.484697	0.106712	Forager	16	87
974	0.885985	0.114015	1	0.712164		Nestmate	16
975	0.886218	0.113782	1	0.474229	0.0104687	Forager	15	87
975	0.886218	0.113782	1	0.946465		Nestmate	15
976	0.886238	0.113762	1	0.473313	0.000915598	Forager	14	87
976	0.886238	0.113762	1	0.993299		Nestmate	14
977	0.886285	0.113715	1	0.471201	0.00211203	Forager	13	87
977	0.886285	0.113715	1	0.95621		Nestmate	13
978	0.886303	0.113697	1	0.470411	0.000790135	Forager	14	87
978	0.886303	0.113697	1	0.994089		Nestmate	14
979	0.886413	0.113587	1	0.465442	0.00496892	Forager	15	87
979	0.886413	0.113587	1	0.951433		Nestmate	15
980	0.886422	0.113578	1	0.465058	0.000383473	Forager	14	87
980	0.886422	0.113578	1	0.994472		Nestmate	14
981	0.886674	0.113326	1	0.45372	0.0113381	Forager	13	87
981	0.886674	0.113326	1	0.967548		Nestmate	13
982	0.886681	0.113319	1	0.453377	0.000343121	Forager	13	87
982	0.886681	0.113319	1	0.967892		Nestmate	13
983	0.886727	0.113273	1	0.451315	0.0020618	Forager	13	87
983	0.886727	0.113273	1	0.969953		Nestmate	13
984	0.886755	0.113245	1	0.45007	0.00124549	Forager	12	87
984	0.886755	0.113245	1	0.988884		Nestmate	12
985	0.886807	0.113193	1	0.447706	0.00236347	Forager	12	87
985	0.886807	0.113193	1	0.991247		Nestmate	12
986	0.886811	0.113189	1	0.447542	0.000164573	Forager	12	87
986	0.886811	0.113189	1	0.991412		Nestmate	12
987	0.88687	0.11313	1	0.444899	0.00264308	Forager	13	87
987	0.88687	0.11313	1	0.972596		Nestmate	13
988	0.88688	0.11312	1	0.444453	0.000445577	Forager	12	87
988	0.88688	0.11312	1	0.991857		Nestmate	12
989	0.886922	0.113078	1	0.442533	0.00192037	Forager	13	87
989	0.886922	0.113078	1	0.974517		Nestmate	13
990	0.88693	0.11307	1	0.442162	0.00037059	Forager	12	87
990	0.88693	0.11307	1	0.992228		Nestmate	12
991	0.886944	0.113056	1	0.441566	0.000595885	Forager	13	87
991	0.886944	0.113056	1	0.975113		Nestmate	13
992	0.886966	0.113034	1	0.440564	0.00100216	Forager	14	87
992	0.886966	0.113034	1	0.995474		Nestmate	14
993	0.886967	0.113033	1	0.440504	6.00731e-05	Forager	14	87
993	0.886967	0.113033	1	0.995534		Nestmate	14
994	0.886994	0.113006	1	0.439304	0.00120059	Forager	13	87
994	0.886994	0.113006	1	0.976313		Nestmate	13
995	0.887002	0.112998	1	0.438941	0.000362679	Forager	12	87
995	0.887002	0.112998	1	0.992591		Nestmate	12
996	0.887036	0.112964	1	0.437436	0.00150483	Forager	12	87
996	0.887036	0.112964	1	0.994096		Nestmate	12
997	0.887064	0.112936	1	0.436177	0.00125902	Forager	12	87
997	0.887064	0.112936	1	0.995355		Nestmate	12
998	0.887064	0.112936	1	0.436144	3.34034e-05	Forager	12	87
998	0.887064	0.112936	1	0.995388		Nestmate	12
999	0.887136	0.112864	1	0.43291	0.00323347	Forager	11	87
999	0.887136	0.112864	1	0.976111		Nestmate	11
1000	0.887188	0.112812	1	0.430563	0.00234741	Forager	10	87
1000	0.887188	0.112812	1	0.989244		Nestmate	10
1001	0.887197	0.112803	1	0.430157	0.000406169	Forager	9	87
1001	0.887197	0.112803	1	0.992258		Nestmate	9
1002	0.887408	0.112592	1	0.420659	0.00949761	Forager	8	87
1002	0.887408	0.112592	1	0.975224		Nestmate	8
1003	0.887506	0.112494	1	0.416245	0.0044138	Forager	8	87
1003	0.887506	0.112494	1	0.979637		Nestmate	8
1004	0.887619	0.112381	1	0.411181	0.00506418	Forager	7	87
1004	0.887619	0.112381	1	0.974389		Nestmate	7
1005	0.889042	0.110958	1	0.347147	0.0640337	Forager	6	87
1005	0.889042	0.110958	1	0.649751		Nestmate	6
1006	0.889096	0.110904	1	0.344708	0.00243926	Forager	6	87
1006	0.889096	0.110904	1	0.652191		Nestmate	6
1007	0.88914	0.11086	1	0.342714	0.00199381	Forager	5	87
1007	0.88914	0.11086	1	0.868964		Nestmate	5
1008	0.889209	0.110791	1	0.339649	0.00306497	Forager	4	87
1008	0.889209	0.110791	1	0.919199		Nestmate	4
1009	0.889217	0.110783	1	0.339274	0.000375613	Forager	5	87
1009	0.889217	0.110783	1	0.86934		Nestmate	5
1010	0.88929	0.11071	1	0.336002	0.00327217	Forager	4	87
1010	0.88929	0.11071	1	0.922471		Nestmate	4
1011	0.889602	0.110398	1	0.321945	0.0140564	Forager	4	87
1011	0.889602	0.110398	1	0.936527		Nestmate	4
1012	0.889739	0.110261	1	0.315801	0.00614446	Forager	4	87
1012	0.889739	0.110261	1	0.942672		Nestmate	4
1013	0.889772	0.110228	1	0.314278	0.00152299	Forager	3	87
1013	0.889772	0.110228	1	0.973858		Nestmate	3
1014	0.89001	0.10999	1	0.303565	0.0107127	Forager	4	87
1014	0.89001	0.10999	1	0.953385		Nestmate	4
1015	0.890162	0.109838	1	0.296753	0.00681221	Forager	5	87
1015	0.890162	0.109838	1	0.876152		Nestmate	5
1016	0.890265	0.109735	1	0.29211	0.00464278	Forager	4	87
1016	0.890265	0.109735	1	0.958027		Nestmate	4
1017	0.890436	0.109564	1	0.284436	0.00767423	Forager	4	87
1017	0.890436	0.109564	1	0.965702		Nestmate	4
1018	0.890517	0.109483	1	0.280764	0.00367125	Forager	4	87
1018	0.890517	0.109483	1	0.969373		Nestmate	4
1019	0.890747	0.109253	1	0.270397	0.0103674	Forager	4	87
1019	0.890747	0.109253	1	0.97974		Nestmate	4
1020	0.890885	0.109115	1	0.264213	0.0061837	Forager	3	87
1020	0.890885	0.109115	1	0.980042		Nestmate	3
1021	0.891192	0.108808	1	0.250392	0.0138217	Forager	2	87
1021	0.891192	0.108808	1	0.978498		Nestmate	2
1022	0.891214	0.108786	1	0.249396	0.000995457	Forager	1	87
1022	0.891214	0.108786	1	0.996631		Nestmate	1
1023	0.891239	0.108761	1	0.248262	0.00113437	Forager	1	87
1023	0.891239	0.108761	1	0.997765		Nestmate	1
1024	0.891263	0.108737	1	0.247186	0.00107611	Forager	2	87
1024	0.891263	0.108737	1	0.979574		Nestmate	2
1025	0.891265	0.108735	1	0.247123	6.26119e-05	Forager	1	87
1025	0.891265	0.108735	1	0.997828		Nestmate	1
1027	0.891452	0.108548	1	0.991577	0.00842309	Forager	1	88
1027	0.891452	0.108548	1	0.884575		Nestmate	1
1028	0.891474	0.108526	1	0.990585	0.00099148	Forager	2	88
1028	0.891474	0.108526	1	0.996379		Nestmate	2
1029	0.891718	0.108282	1	0.979622	0.0109633	Forager	1	88
1029	0.891718	0.108282	1	0.895538		Nestmate	1
1030	0.891721	0.108279	1	0.979473	0.000148705	Forager	2	88
1030	0.891721	0.108279	1	0.996528		Nestmate	2
1031	0.895713	0.104287	1	0.799824	0.17965	Forager	3	88
1031	0.895713	0.104287	1	0.526689		Nestmate	3
1032	0.899621	0.100379	1	0.623962	0.175862	Forager	3	88
1032	0.899621	0.100379	1	0.702551		Nestmate	3
1033	0.900044	0.0999559	1	0.604928	0.0190335	Forager	4	88
1033	0.900044	0.0999559	1	0.71799		Nestmate	4
1034	0.900709	0.0992912	1	0.575015	0.0299137	Forager	3	88
1034	0.900709	0.0992912	1	0.732465		Nestmate	3
1035	0.900728	0.0992721	1	0.574157	0.000857841	Forager	2	88
1035	0.900728	0.0992721	1	0.997386		Nestmate	2
1036	0.900845	0.0991554	1	0.568903	0.00525405	Forager	3	88
1036	0.900845	0.0991554	1	0.737719		Nestmate	3
1037	0.900848	0.0991516	1	0.568735	0.00016772	Forager	2	88
1037	0.900848	0.0991516	1	0.997554		Nestmate	2
1038	0.901935	0.098065	1	0.519837	0.0488982	Forager	3	88
1038	0.901935	0.098065	1	0.786617		Nestmate	3
1039	0.902417	0.0975833	1	0.49816	0.0216764	Forager	4	88
1039	0.902417	0.0975833	1	0.739667		Nestmate	4
1040	0.902423	0.097577	1	0.497875	0.000285592	Forager	5	88
1040	0.902423	0.097577	1	0.99917		Nestmate	5
1041	0.902871	0.0971287	1	0.477705	0.0201704	Forager	6	88
1041	0.902871	0.0971287	1	0.548596		Nestmate	6
1042	0.902897	0.0971028	1	0.476536	0.00116897	Forager	6	88
1042	0.902897	0.0971028	1	0.549765		Nestmate	6
1043	0.902944	0.0970559	1	0.474425	0.00211037	Forager	7	88
1043	0.902944	0.0970559	1	0.818189		Nestmate	7
1044	0.902955	0.0970454	1	0.473954	0.000471501	Forager	8	88
1044	0.902955	0.0970454	1	0.930096		Nestmate	8
1045	0.90486	0.0951405	1	0.388233	0.0857208	Forager	7	88
1045	0.90486	0.0951405	1	0.90391		Nestmate	7
1046	0.904995	0.0950052	1	0.382145	0.00608803	Forager	7	88
1046	0.904995	0.0950052	1	0.909998		Nestmate	7
1047	0.906675	0.0933252	1	0.306544	0.0756008	Forager	6	88
1047	0.906675	0.0933252	1	0.625365		Nestmate	6
1048	0.906675	0.0933248	1	0.306529	1.52831e-05	Forager	5	88
1048	0.906675	0.0933248	1	0.999185		Nestmate	5
1049	0.907034	0.0929655	1	0.290359	0.0161696	Forager	4	88
1049	0.907034	0.0929655	1	0.755837		Nestmate	4
1050	0.907704	0.0922958	1	0.260224	0.0301347	Forager	4	88
1050	0.907704	0.0922958	1	0.785971		Nestmate	4
1051	0.908427	0.0915732	1	0.227703	0.032521	Forager	3	88
1051	0.908427	0.0915732	1	0.819138		Nestmate	3
1052	0.908433	0.0915674	1	0.227445	0.0002586	Forager	2	88
1052	0.908433	0.0915674	1	0.997812		Nestmate	2
1053	0.908449	0.0915509	1	0.226704	0.000741338	Forager	1	88
1053	0.908449	0.0915509	1	0.89628		Nestmate	1
1054	0.908832	0.0911678	1	0.20946	0.0172432	Forager	1	88
1054	0.908832	0.0911678	1	0.913523		Nestmate	1
1055	0.909383	0.0906172	1	0.184687	0.0247729	Forager	1	88
1055	0.909383	0.0906172	1	0.938296		Nestmate	1
1057	0.909599	0.0904006	1	0.99025	0.00975042	Forager	1	89
1057	0.909599	0.0904006	1	0.932208		Nestmate	1
1059	0.909738	0.0902624	1	0.993784	0.00621623	Forager	1	90
1059	0.909738	0.0902624	1	0.825354		Nestmate	1
1060	0.909788	0.0902115	1	0.991492	0.00229158	Forager	2	90
1060	0.909788	0.0902115	1	0.976117		Nestmate	2
1061	0.911066	0.0889338	1	0.933995	0.057497	Forager	3	90
1061	0.911066	0.0889338	1	0.709688		Nestmate	3
1062	0.911094	0.0889058	1	0.932736	0.00125898	Forager	2	90
1062	0.911094	0.0889058	1	0.977376		Nestmate	2
1063	0.911147	0.088853	1	0.930359	0.00237739	Forager	2	90
1063	0.911147	0.088853	1	0.979754		Nestmate	2
1064	0.913376	0.0866239	1	0.830048	0.100311	Forager	1	90
1064	0.913376	0.0866239	1	0.925665		Nestmate	1
1065	0.91338	0.0866202	1	0.829882	0.000165828	Forager	2	90
1065	0.91338	0.0866202	1	0.97992		Nestmate	2
1066	0.913425	0.0865748	1	0.827842	0.00203988	Forager	2	90
1066	0.913425	0.0865748	1	0.981959		Nestmate	2
1067	0.913744	0.0862558	1	0.813487	0.0143552	Forager	1	90
1067	0.913744	0.0862558	1	0.94002		Nestmate	1
1068	0.913791	0.0862087	1	0.811367	0.00212031	Forager	2	90
1068	0.913791	0.0862087	1	0.98408		Nestmate	2
1069	0.9143	0.0857001	1	0.788481	0.0228861	Forager	3	90
1069	0.9143	0.0857001	1	0.732574		Nestmate	3
1070	0.91463	0.08537	1	0.773626	0.0148551	Forager	2	90
1070	0.91463	0.08537	1	0.998935		Nestmate	2
1071	0.914677	0.0853229	1	0.771505	0.00212111	Forager	3	90
1071	0.914677	0.0853229	1	0.734695		Nestmate	3
1072	0.914892	0.0851077	1	0.761822	0.00968272	Forager	4	90
1072	0.914892	0.0851077	1	0.949684		Nestmate	4
1073	0.915049	0.0849505	1	0.754748	0.0070733	Forager	5	90
1073	0.915049	0.0849505	1	0.939281		Nestmate	5
1074	0.915673	0.0843273	1	0.726703	0.0280459	Forager	6	90
1074	0.915673	0.0843273	1	0.895245		Nestmate	6
1075	0.916056	0.0839438	1	0.709447	0.0172555	Forager	6	90
1075	0.916056	0.0839438	1	0.912501		Nestmate	6
1076	0.916059	0.0839414	1	0.709339	0.000108342	Forager	7	90
1076	0.916059	0.0839414	1	0.995643		Nestmate	7
1077	0.91658	0.0834198	1	0.685868	0.0234712	Forager	6	90
1077	0.91658	0.0834198	1	0.935972		Nestmate	6
1078	0.916636	0.083364	1	0.683357	0.00251095	Forager	6	90
1078	0.916636	0.083364	1	0.938483		Nestmate	6
1079	0.916802	0.0831978	1	0.675874	0.00748225	Forager	5	90
1079	0.916802	0.0831978	1	0.946763		Nestmate	5
1080	0.917011	0.0829889	1	0.666473	0.00940131	Forager	4	90
1080	0.917011	0.0829889	1	0.959086		Nestmate	4
1081	0.91704	0.0829596	1	0.665157	0.00131628	Forager	4	90
1081	0.91704	0.0829596	1	0.960402		Nestmate	4
1082	0.917176	0.0828238	1	0.659045	0.00611169	Forager	4	90
1082	0.917176	0.0828238	1	0.966514		Nestmate	4
1083	0.917302	0.082698	1	0.653385	0.0056606	Forager	4	90
1083	0.917302	0.082698	1	0.972174		Nestmate	4
1084	0.917457	0.0825428	1	0.646399	0.0069858	Forager	3	90
1084	0.917457	0.0825428	1	0.741681		Nestmate	3
1085	0.917462	0.0825385	1	0.646206	0.000193203	Forager	2	90
1085	0.917462	0.0825385	1	0.999128		Nestmate	2
1086	0.917463	0.0825371	1	0.646143	6.25216e-05	Forager	2	90
1086	0.917463	0.0825371	1	0.999191		Nestmate	2
1087	0.917724	0.0822757	1	0.63438	0.0117632	Forager	3	90
1087	0.917724	0.0822757	1	0.753444		Nestmate	3
1088	0.917771	0.0822289	1	0.632277	0.00210295	Forager	4	90
1088	0.917771	0.0822289	1	0.974277		Nestmate	4
1089	0.919436	0.0805643	1	0.557366	0.0749109	Forager	3	90
1089	0.919436	0.0805643	1	0.828355		Nestmate	3
1090	0.919498	0.0805018	1	0.554557	0.00280871	Forager	4	90
1090	0.919498	0.0805018	1	0.977086		Nestmate	4
1091	0.919677	0.0803233	1	0.546524	0.00803332	Forager	5	90
1091	0.919677	0.0803233	1	0.954797		Nestmate	5
1092	0.919885	0.0801154	1	0.537169	0.00935546	Forager	5	90
1092	0.919885	0.0801154	1	0.964152		Nestmate	5
1093	0.919928	0.0800719	1	0.535208	0.00196013	Forager	6	90
1093	0.919928	0.0800719	1	0.940443		Nestmate	6
1094	0.919937	0.0800628	1	0.534799	0.000409853	Forager	7	90
1094	0.919937	0.0800628	1	0.996053		Nestmate	7
1095	0.920629	0.079371	1	0.503667	0.0311311	Forager	6	90
1095	0.920629	0.079371	1	0.971574		Nestmate	6
1096	0.92074	0.0792604	1	0.498694	0.00497313	Forager	6	90
1096	0.92074	0.0792604	1	0.976547		Nestmate	6
1097	0.920828	0.079172	1	0.494713	0.00398148	Forager	6	90
1097	0.920828	0.079172	1	0.980529		Nestmate	6
1098	0.92108	0.0789203	1	0.483386	0.0113267	Forager	5	90
1098	0.92108	0.0789203	1	0.975479		Nestmate	5
1099	0.921149	0.0788506	1	0.480252	0.00313442	Forager	4	90
1099	0.921149	0.0788506	1	0.98022		Nestmate	4
1100	0.921234	0.0787656	1	0.476427	0.00382438	Forager	5	90
1100	0.921234	0.0787656	1	0.979303		Nestmate	5
1101	0.921265	0.0787345	1	0.475028	0.00139884	Forager	5	90
1101	0.921265	0.0787345	1	0.980702		Nestmate	5
1102	0.921472	0.0785284	1	0.465751	0.00927777	Forager	6	90
1102	0.921472	0.0785284	1	0.989807		Nestmate	6
1103	0.921495	0.0785051	1	0.464703	0.00104801	Forager	7	90
1103	0.921495	0.0785051	1	0.997101		Nestmate	7
1104	0.921505	0.078495	1	0.464251	0.000452113	Forager	7	90
1104	0.921505	0.078495	1	0.997553		Nestmate	7
1105	0.921506	0.078494	1	0.464206	4.49075e-05	Forager	6	90
1105	0.921506	0.078494	1	0.989851		Nestmate	6
1106	0.921526	0.0784736	1	0.463288	0.000917712	Forager	6	90
1106	0.921526	0.0784736	1	0.990769		Nestmate	6
1107	0.921544	0.0784559	1	0.462491	0.000796454	Forager	5	90
1107	0.921544	0.0784559	1	0.981498		Nestmate	5
1108	0.921569	0.0784309	1	0.461364	0.00112798	Forager	5	90
1108	0.921569	0.0784309	1	0.982626		Nestmate	5
1109	0.92161	0.0783901	1	0.459528	0.00183552	Forager	6	90
1109	0.92161	0.0783901	1	0.992605		Nestmate	6
1110	0.921612	0.0783877	1	0.459423	0.000105403	Forager	7	90
1110	0.921612	0.0783877	1	0.997658		Nestmate	7
1111	0.921689	0.0783111	1	0.455976	0.00344679	Forager	8	90
1111	0.921689	0.0783111	1	0.870786		Nestmate	8
1112	0.922051	0.0779486	1	0.439662	0.0163138	Forager	8	90
1112	0.922051	0.0779486	1	0.8871		Nestmate	8
1113	0.92206	0.07794	1	0.439274	0.000388499	Forager	7	90
1113	0.92206	0.07794	1	0.998047		Nestmate	7
1114	0.922417	0.0775826	1	0.423191	0.0160826	Forager	8	90
1114	0.922417	0.0775826	1	0.903182		Nestmate	8
1115	0.922439	0.0775615	1	0.42224	0.000950435	Forager	7	90
1115	0.922439	0.0775615	1	0.998997		Nestmate	7
1116	0.92245	0.0775496	1	0.421707	0.00053339	Forager	6	90
1116	0.92245	0.0775496	1	0.993138		Nestmate	6
1117	0.922451	0.0775486	1	0.421663	4.42121e-05	Forager	7	90
1117	0.922451	0.0775486	1	0.999041		Nestmate	7
1118	0.922453	0.0775468	1	0.421578	8.43945e-05	Forager	6	90
1118	0.922453	0.0775468	1	0.993222		Nestmate	6
1119	0.922475	0.0775247	1	0.420588	0.000990561	Forager	6	90
1119	0.922475	0.0775247	1	0.994213		Nestmate	6
1120	0.922503	0.0774968	1	0.419329	0.00125906	Forager	5	90
1120	0.922503	0.0774968	1	0.983886		Nestmate	5
1121	0.922524	0.0774755	1	0.418373	0.000956125	Forager	4	90
1121	0.922524	0.0774755	1	0.981176		Nestmate	4
1122	0.922745	0.077255	1	0.408449	0.00992376	Forager	3	90
1122	0.922745	0.077255	1	0.838278		Nestmate	3
1123	0.92275	0.0772501	1	0.408227	0.000222204	Forager	2	90
1123	0.92275	0.0772501	1	0.999413		Nestmate	2
1124	0.922986	0.0770139	1	0.397599	0.0106274	Forager	1	90
1124	0.922986	0.0770139	1	0.950647		Nestmate	1
1125	0.923072	0.0769284	1	0.393753	0.0038459	Forager	1	90
1125	0.923072	0.0769284	1	0.954493		Nestmate	1
1126	0.923073	0.0769273	1	0.393704	4.91578e-05	Forager	1	90
1126	0.923073	0.0769273	1	0.954543		Nestmate	1
1128	0.923074	0.0769261	1	0.999944	5.55003e-05	Forager	1	91
1128	0.923074	0.0769261	1	0.786027		Nestmate	1
1129	0.923328	0.0766715	1	0.988489	0.0114559	Forager	2	91
1129	0.923328	0.0766715	1	0.962889		Nestmate	2
1130	0.923986	0.0760145	1	0.958921	0.0295675	Forager	3	91
1130	0.923986	0.0760145	1	0.863387		Nestmate	3
1131	0.923994	0.076006	1	0.958542	0.000379335	Forager	4	91
1131	0.923994	0.076006	1	0.903562		Nestmate	4
1132	0.924833	0.0751668	1	0.920778	0.0377638	Forager	3	91
1132	0.924833	0.0751668	1	0.901151		Nestmate	3
1133	0.92485	0.0751499	1	0.920016	0.000761548	Forager	2	91
1133	0.92485	0.0751499	1	0.963651		Nestmate	2
1134	0.924879	0.0751214	1	0.918732	0.00128417	Forager	1	91
1134	0.924879	0.0751214	1	0.787311		Nestmate	1
1136	0.924963	0.075037	1	0.996203	0.00379661	Forager	1	92
1136	0.924963	0.075037	1	0.956325		Nestmate	1
1137	0.925005	0.0749951	1	0.99432	0.00188374	Forager	1	92
1137	0.925005	0.0749951	1	0.958208		Nestmate	1
1138	0.925006	0.0749938	1	0.994257	6.25514e-05	Forager	1	92
1138	0.925006	0.0749938	1	0.958271		Nestmate	1
1140	0.925047	0.0749528	1	0.998157	0.00184255	Forager	1	93
1140	0.925047	0.0749528	1	0.978156		Nestmate	1
1141	0.92517	0.0748305	1	0.992652	0.00550535	Forager	2	93
1141	0.92517	0.0748305	1	0.913712		Nestmate	2
1142	0.925306	0.074694	1	0.986513	0.00613937	Forager	3	93
1142	0.925306	0.074694	1	0.990025		Nestmate	3
1143	0.925308	0.0746918	1	0.986411	0.00010132	Forager	3	93
1143	0.925308	0.0746918	1	0.990126		Nestmate	3
1144	0.925811	0.0741891	1	0.963788	0.0226231	Forager	2	93
1144	0.925811	0.0741891	1	0.936336		Nestmate	2
1145	0.925817	0.0741831	1	0.963521	0.000267532	Forager	3	93
1145	0.925817	0.0741831	1	0.990394		Nestmate	3
1146	0.925902	0.0740982	1	0.959698	0.00382299	Forager	2	93
1146	0.925902	0.0740982	1	0.940159		Nestmate	2
1147	0.92592	0.0740801	1	0.958886	0.000811693	Forager	1	93
1147	0.92592	0.0740801	1	0.978967		Nestmate	1
1148	0.925984	0.0740162	1	0.956009	0.00287749	Forager	1	93
1148	0.925984	0.0740162	1	0.981845		Nestmate	1
1149	0.926022	0.0739782	1	0.954301	0.00170719	Forager	2	93
1149	0.926022	0.0739782	1	0.941866		Nestmate	2
1150	0.926066	0.073934	1	0.952309	0.00199232	Forager	2	93
1150	0.926066	0.073934	1	0.943858		Nestmate	2
1151	0.926071	0.0739293	1	0.952098	0.000211035	Forager	3	93
1151	0.926071	0.0739293	1	0.990605		Nestmate	3
1152	0.926131	0.0738694	1	0.949402	0.00269566	Forager	3	93
1152	0.926131	0.0738694	1	0.9933		Nestmate	3
1153	0.926138	0.073862	1	0.949071	0.000331054	Forager	3	93
1153	0.926138	0.073862	1	0.993631		Nestmate	3
1154	0.926268	0.0737324	1	0.943239	0.00583266	Forager	4	93
1154	0.926268	0.0737324	1	0.960375		Nestmate	4
1155	0.926641	0.073359	1	0.926435	0.0168042	Forager	4	93
1155	0.926641	0.073359	1	0.977179		Nestmate	4
1156	0.926645	0.0733547	1	0.926244	0.00019043	Forager	5	93
1156	0.926645	0.0733547	1	0.999603		Nestmate	5
1157	0.926663	0.0733367	1	0.92543	0.000813846	Forager	4	93
1157	0.926663	0.0733367	1	0.977993		Nestmate	4
1158	0.926666	0.073334	1	0.925312	0.000118648	Forager	5	93
1158	0.926666	0.073334	1	0.999722		Nestmate	5
1159	0.927022	0.0729779	1	0.909287	0.0160249	Forager	6	93
1159	0.927022	0.0729779	1	0.85185		Nestmate	6
1160	0.927024	0.0729759	1	0.909194	9.24958e-05	Forager	5	93
1160	0.927024	0.0729759	1	0.999814		Nestmate	5
1161	0.927119	0.0728807	1	0.904912	0.00428262	Forager	4	93
1161	0.927119	0.0728807	1	0.982276		Nestmate	4
1162	0.927119	0.0728807	1	0.904911	5.13575e-07	Forager	5	93
1162	0.927119	0.0728807	1	0.999815		Nestmate	5
1163	0.927305	0.0726951	1	0.896562	0.00834866	Forager	6	93
1163	0.927305	0.0726951	1	0.860198		Nestmate	6
1164	0.927326	0.0726743	1	0.895626	0.000936034	Forager	7	93
1164	0.927326	0.0726743	1	0.980978		Nestmate	7
1165	0.927329	0.0726708	1	0.895469	0.000157517	Forager	8	93
1165	0.927329	0.0726708	1	0.999343		Nestmate	8
1166	0.92736	0.07264	1	0.894082	0.00138683	Forager	7	93
1166	0.92736	0.07264	1	0.982364		Nestmate	7
1167	0.927362	0.0726383	1	0.894004	7.81744e-05	Forager	8	93
1167	0.927362	0.0726383	1	0.999421		Nestmate	8
1168	0.927433	0.0725668	1	0.890789	0.00321516	Forager	9	93
1168	0.927433	0.0725668	1	0.952986		Nestmate	9
1169	0.927437	0.0725625	1	0.890594	0.000194793	Forager	8	93
1169	0.927437	0.0725625	1	0.999616		Nestmate	8
1170	0.927478	0.0725218	1	0.888761	0.00183312	Forager	7	93
1170	0.927478	0.0725218	1	0.984197		Nestmate	7
1171	0.927549	0.072451	1	0.885575	0.00318537	Forager	6	93
1171	0.927549	0.072451	1	0.863384		Nestmate	6
1172	0.928324	0.0716761	1	0.850704	0.0348718	Forager	6	93
1172	0.928324	0.0716761	1	0.898256		Nestmate	6
1173	0.928495	0.0715047	1	0.842994	0.00770937	Forager	6	93
1173	0.928495	0.0715047	1	0.905965		Nestmate	6
1174	0.928526	0.0714743	1	0.841625	0.00136962	Forager	7	93
1174	0.928526	0.0714743	1	0.985567		Nestmate	7
1175	0.928558	0.0714425	1	0.840193	0.00143183	Forager	7	93
1175	0.928558	0.0714425	1	0.986999		Nestmate	7
1176	0.928592	0.071408	1	0.838639	0.00155347	Forager	6	93
1176	0.928592	0.071408	1	0.907518		Nestmate	6
1177	0.92865	0.0713501	1	0.836037	0.00260189	Forager	7	93
1177	0.92865	0.0713501	1	0.989601		Nestmate	7
1178	0.92865	0.0713499	1	0.836026	1.18272e-05	Forager	8	93
1178	0.92865	0.0713499	1	0.999628		Nestmate	8
1179	0.928659	0.0713411	1	0.835631	0.000394467	Forager	7	93
1179	0.928659	0.0713411	1	0.989995		Nestmate	7
1180	0.928659	0.0713407	1	0.835614	1.69196e-05	Forager	8	93
1180	0.928659	0.0713407	1	0.999644		Nestmate	8
1181	0.928809	0.0711907	1	0.828861	0.00675266	Forager	9	93
1181	0.928809	0.0711907	1	0.959739		Nestmate	9
1182	0.92881	0.0711897	1	0.828818	4.39118e-05	Forager	8	93
1182	0.92881	0.0711897	1	0.999688		Nestmate	8
1183	0.928838	0.0711619	1	0.827566	0.00125177	Forager	9	93
1183	0.928838	0.0711619	1	0.960991		Nestmate	9
1184	0.931552	0.0684483	1	0.705454	0.122112	Forager	10	93
1184	0.931552	0.0684483	1	0.747478		Nestmate	10
1185	0.931601	0.0683985	1	0.703214	0.00223993	Forager	10	93
1185	0.931601	0.0683985	1	0.749718		Nestmate	10
1186	0.932051	0.0679488	1	0.682975	0.020239	Forager	10	93
1186	0.932051	0.0679488	1	0.769956		Nestmate	10
1187	0.932188	0.067812	1	0.676822	0.00615283	Forager	9	93
1187	0.932188	0.067812	1	0.967143		Nestmate	9
1188	0.932572	0.0674277	1	0.659527	0.0172953	Forager	10	93
1188	0.932572	0.0674277	1	0.787252		Nestmate	10
1189	0.932595	0.0674052	1	0.658515	0.00101208	Forager	9	93
1189	0.932595	0.0674052	1	0.968155		Nestmate	9
1190	0.932742	0.0672584	1	0.651911	0.0066035	Forager	9	93
1190	0.932742	0.0672584	1	0.974759		Nestmate	9
1191	0.932762	0.0672381	1	0.650997	0.000914438	Forager	10	93
1191	0.932762	0.0672381	1	0.788166		Nestmate	10
1192	0.933441	0.0665585	1	0.620414	0.0305825	Forager	10	93
1192	0.933441	0.0665585	1	0.818749		Nestmate	10
1193	0.933509	0.0664906	1	0.617357	0.00305706	Forager	10	93
1193	0.933509	0.0664906	1	0.821806		Nestmate	10
1194	0.933579	0.0664209	1	0.614222	0.00313509	Forager	9	93
1194	0.933579	0.0664209	1	0.977894		Nestmate	9
1195	0.933905	0.066095	1	0.599558	0.0146644	Forager	10	93
1195	0.933905	0.066095	1	0.83647		Nestmate	10
1196	0.93391	0.0660899	1	0.599324	0.000233041	Forager	11	93
1196	0.93391	0.0660899	1	0.998061		Nestmate	11
1197	0.933951	0.0660494	1	0.597505	0.00181964	Forager	12	93
1197	0.933951	0.0660494	1	0.981457		Nestmate	12
1198	0.934064	0.0659362	1	0.59241	0.00509452	Forager	13	93
1198	0.934064	0.0659362	1	0.935581		Nestmate	13
1199	0.93429	0.0657099	1	0.582226	0.0101838	Forager	14	93
1199	0.93429	0.0657099	1	0.855834		Nestmate	14
1200	0.934424	0.065576	1	0.576202	0.00602453	Forager	14	93
1200	0.934424	0.065576	1	0.861859		Nestmate	14
1201	0.935096	0.0649037	1	0.545946	0.0302557	Forager	13	93
1201	0.935096	0.0649037	1	0.965837		Nestmate	13
1202	0.935172	0.0648279	1	0.542537	0.00340889	Forager	12	93
1202	0.935172	0.0648279	1	0.984866		Nestmate	12
1203	0.935246	0.0647542	1	0.539218	0.00331887	Forager	12	93
1203	0.935246	0.0647542	1	0.988185		Nestmate	12
1204	0.935249	0.0647513	1	0.539088	0.000130926	Forager	11	93
1204	0.935249	0.0647513	1	0.998192		Nestmate	11
1205	0.935289	0.0647114	1	0.537296	0.00179186	Forager	12	93
1205	0.935289	0.0647114	1	0.989977		Nestmate	12
1206	0.935394	0.0646064	1	0.532568	0.00472786	Forager	13	93
1206	0.935394	0.0646064	1	0.970565		Nestmate	13
1207	0.935574	0.0644262	1	0.524459	0.00810873	Forager	14	93
1207	0.935574	0.0644262	1	0.869967		Nestmate	14
1208	0.935701	0.0642994	1	0.518754	0.00570511	Forager	14	93
1208	0.935701	0.0642994	1	0.875672		Nestmate	14
1209	0.93574	0.0642598	1	0.51697	0.00178358	Forager	13	93
1209	0.93574	0.0642598	1	0.972348		Nestmate	13
1210	0.93575	0.0642501	1	0.516537	0.000433525	Forager	13	93
1210	0.93575	0.0642501	1	0.972782		Nestmate	13
1211	0.9358	0.0642004	1	0.5143	0.00223683	Forager	12	93
1211	0.9358	0.0642004	1	0.992214		Nestmate	12
1212	0.935887	0.0641127	1	0.510353	0.00394687	Forager	13	93
1212	0.935887	0.0641127	1	0.976729		Nestmate	13
1213	0.935914	0.064086	1	0.509149	0.00120417	Forager	13	93
1213	0.935914	0.064086	1	0.977933		Nestmate	13
1214	0.936756	0.0632445	1	0.471282	0.0378671	Forager	14	93
1214	0.936756	0.0632445	1	0.913539		Nestmate	14
1215	0.936759	0.0632412	1	0.471136	0.00014585	Forager	15	93
1215	0.936759	0.0632412	1	0.992404		Nestmate	15
1216	0.936778	0.0632217	1	0.470255	0.000880772	Forager	15	93
1216	0.936778	0.0632217	1	0.993285		Nestmate	15
1217	0.936787	0.0632129	1	0.469863	0.000392417	Forager	15	93
1217	0.936787	0.0632129	1	0.993677		Nestmate	15
1218	0.936796	0.0632038	1	0.46945	0.000412997	Forager	15	93
1218	0.936796	0.0632038	1	0.99409		Nestmate	15
1219	0.940247	0.0597531	1	0.314169	0.155281	Forager	16	93
1219	0.940247	0.0597531	1	0.734714		Nestmate	16
1220	0.940249	0.0597513	1	0.314089	8.05263e-05	Forager	17	93
1220	0.940249	0.0597513	1	0.995109		Nestmate	17
1221	0.940403	0.0595967	1	0.307133	0.00695542	Forager	16	93
1221	0.940403	0.0595967	1	0.74167		Nestmate	16
1222	0.940424	0.0595759	1	0.306197	0.000935662	Forager	17	93
1222	0.940424	0.0595759	1	0.996045		Nestmate	17
1223	0.940671	0.0593289	1	0.295079	0.0111181	Forager	16	93
1223	0.940671	0.0593289	1	0.752788		Nestmate	16
1224	0.941513	0.0584867	1	0.257182	0.0378974	Forager	16	93
1224	0.941513	0.0584867	1	0.790685		Nestmate	16
1225	0.941534	0.0584665	1	0.256273	0.000909248	Forager	15	93
1225	0.941534	0.0584665	1	0.994999		Nestmate	15
1226	0.941615	0.0583852	1	0.252615	0.00365769	Forager	14	93
1226	0.941615	0.0583852	1	0.917197		Nestmate	14
1227	0.941656	0.0583439	1	0.250757	0.0018576	Forager	14	93
1227	0.941656	0.0583439	1	0.919055		Nestmate	14
1228	0.941692	0.058308	1	0.249139	0.001618	Forager	13	93
1228	0.941692	0.058308	1	0.979551		Nestmate	13
1229	0.941723	0.0582768	1	0.247739	0.00140059	Forager	13	93
1229	0.941723	0.0582768	1	0.980951		Nestmate	13
1230	0.941753	0.0582471	1	0.246399	0.00133989	Forager	12	93
1230	0.941753	0.0582471	1	0.993553		Nestmate	12
1231	0.941754	0.0582455	1	0.246329	7.00896e-05	Forager	11	93
1231	0.941754	0.0582455	1	0.998262		Nestmate	11
1232	0.941756	0.0582443	1	0.246274	5.52193e-05	Forager	12	93
1232	0.941756	0.0582443	1	0.993609		Nestmate	12
1233	0.941766	0.0582343	1	0.245824	0.000450092	Forager	11	93
1233	0.941766	0.0582343	1	0.998712		Nestmate	11
1234	0.941777	0.0582229	1	0.245309	0.000514322	Forager	11	93
1234	0.941777	0.0582229	1	0.999226		Nestmate	11
1235	0.941793	0.0582066	1	0.244576	0.000733154	Forager	12	93
1235	0.941793	0.0582066	1	0.994342		Nestmate	12
1236	0.941794	0.0582064	1	0.244569	6.92806e-06	Forager	11	93
1236	0.941794	0.0582064	1	0.999233		Nestmate	11
1237	0.941794	0.058206	1	0.244552	1.70522e-05	Forager	11	93
1237	0.941794	0.058206	1	0.99925		Nestmate	11
1238	0.941794	0.058206	1	0.24455	1.95819e-06	Forager	11	93
1238	0.941794	0.058206	1	0.999252		Nestmate	11
1239	0.941799	0.0582006	1	0.244309	0.000240682	Forager	11	93
1239	0.941799	0.0582006	1	0.999493		Nestmate	11
1240	0.942564	0.0574358	1	0.209892	0.0344178	Forager	10	93
1240	0.942564	0.0574358	1	0.870888		Nestmate	10
1241	0.942587	0.0574133	1	0.208878	0.00101411	Forager	9	93
1241	0.942587	0.0574133	1	0.978908		Nestmate	9
1242	0.942672	0.0573277	1	0.205026	0.00385111	Forager	9	93
1242	0.942672	0.0573277	1	0.982759		Nestmate	9
1243	0.942681	0.0573194	1	0.204655	0.000371363	Forager	9	93
1243	0.942681	0.0573194	1	0.983131		Nestmate	9
1244	0.942695	0.0573046	1	0.203988	0.000666627	Forager	9	93
1244	0.942695	0.0573046	1	0.983797		Nestmate	9
1245	0.942697	0.0573027	1	0.203903	8.55296e-05	Forager	8	93
1245	0.942697	0.0573027	1	0.999774		Nestmate	8
1246	0.942704	0.0572956	1	0.203584	0.000319214	Forager	9	93
1246	0.942704	0.0572956	1	0.984116		Nestmate	9
1247	0.942706	0.0572935	1	0.203488	9.53853e-05	Forager	8	93
1247	0.942706	0.0572935	1	0.999869		Nestmate	8
1248	0.942707	0.0572932	1	0.203477	1.15764e-05	Forager	8	93
1248	0.942707	0.0572932	1	0.999881		Nestmate	8
1249	0.942747	0.0572532	1	0.201676	0.00180127	Forager	7	93
1249	0.942747	0.0572532	1	0.991797		Nestmate	7
1250	0.942911	0.0570887	1	0.194274	0.00740162	Forager	6	93
[truncated: 676,547+ more rows]

## Sheet: Trip_data_1D
step	colony state	empty colony state	repeat	exiting crop	trip length
2	0.00487206	0.995128	1	0.780758	1
22	0.0270943	0.972906	1	0	19
29	0.0493165	0.950684	1	0	6
37	0.0715387	0.928461	1	0	7
59	0.0937609	0.906239	1	0	21
62	0.102736	0.897264	1	0.596104	2
75	0.121735	0.878265	1	0.145075	12
77	0.133322	0.866678	1	0.478584	1
79	0.133639	0.866361	1	0.985739	1
81	0.133948	0.866052	1	0.986076	1
88	0.147412	0.852588	1	0.394141	6
90	0.148626	0.851374	1	0.94535	1
107	0.170848	0.829152	1	0	16
132	0.193071	0.806929	1	0	24
138	0.207582	0.792418	1	0.34698	5
141	0.214822	0.785178	1	0.674209	2
165	0.237044	0.762956	1	0	23
167	0.242379	0.757621	1	0.75995	1
186	0.264601	0.735399	1	0	18
204	0.286823	0.713177	1	0	17
206	0.290285	0.709715	1	0.844189	1
221	0.312508	0.687492	1	0	14
226	0.318643	0.681357	1	0.723921	4
228	0.320797	0.679203	1	0.903057	1
239	0.329997	0.670003	1	0.58601	10
260	0.352219	0.647781	1	0	20
265	0.363893	0.636107	1	0.474683	4
271	0.37006	0.62994	1	0.722464	5
283	0.392282	0.607718	1	0	11
285	0.39421	0.60579	1	0.913257	1
287	0.397228	0.602772	1	0.864206	1
295	0.409943	0.590057	1	0.427822	7
297	0.415008	0.584992	1	0.772071	1
311	0.433616	0.566384	1	0.162657	13
313	0.435185	0.564815	1	0.929389	1
315	0.435198	0.564802	1	0.999394	1
324	0.441903	0.558097	1	0.698269	8
343	0.459475	0.540525	1	0.20926	18
346	0.464897	0.535103	1	0.756012	2
350	0.470668	0.529332	1	0.740319	3
352	0.476397	0.523603	1	0.74219	1
354	0.476536	0.523464	1	0.993724	1
356	0.476927	0.523073	1	0.98243	1
359	0.479697	0.520303	1	0.875361	2
361	0.483046	0.516954	1	0.849278	1
363	0.484432	0.515568	1	0.93765	1
382	0.498535	0.501465	1	0.365367	18
406	0.518071	0.481929	1	0.120873	23
410	0.520621	0.479379	1	0.885238	3
412	0.522942	0.477058	1	0.895572	1
414	0.524361	0.475639	1	0.936125	1
429	0.539585	0.460415	1	0.314921	14
439	0.552732	0.447268	1	0.408379	9
470	0.574954	0.425046	1	0	30
473	0.586743	0.413257	1	0.469535	2
475	0.587691	0.412309	1	0.957315	1
496	0.608843	0.391157	1	0.0481431	20
498	0.609347	0.390653	1	0.977356	1
518	0.626501	0.373499	1	0.228047	19
527	0.628968	0.371032	1	0.888971	8
556	0.644085	0.355915	1	0.31975	28
558	0.64736	0.35264	1	0.85261	1
590	0.669583	0.330417	1	0	31
622	0.690776	0.309224	1	0.0462954	31
625	0.691385	0.308615	1	0.972623	2
627	0.691574	0.308426	1	0.991478	1
629	0.692115	0.307885	1	0.975636	1
650	0.711834	0.288166	1	0.112653	20
661	0.729274	0.270726	1	0.21519	10
687	0.751497	0.248503	1	0	25
689	0.751505	0.248495	1	0.999622	1
706	0.770914	0.229086	1	0.126607	16
709	0.777826	0.222174	1	0.688944	2
715	0.7798	0.2202	1	0.91118	5
717	0.780957	0.219043	1	0.947919	1
719	0.782739	0.217261	1	0.919831	1
721	0.782791	0.217209	1	0.997628	1
755	0.799727	0.200273	1	0.237923	33
779	0.814114	0.185886	1	0.352564	23
781	0.814662	0.185338	1	0.975342	1
847	0.836884	0.163116	1	0	65
850	0.849832	0.150168	1	0.417366	2
921	0.872054	0.127946	1	0	70
923	0.872394	0.127606	1	0.984687	1
925	0.872433	0.127567	1	0.998269	1
936	0.874534	0.125466	1	0.905433	10
1026	0.891265	0.108735	1	0.247123	89
1056	0.909383	0.0906172	1	0.184687	29
1058	0.909599	0.0904006	1	0.99025	1
1127	0.923073	0.0769273	1	0.393704	68
1135	0.924879	0.0751214	1	0.918732	7
1139	0.925006	0.0749938	1	0.994257	3
1263	0.94413	0.0558698	1	0.139424	123
1516	0.96261	0.0373899	1	0.168402	252
1815	0.984215	0.0157852	1	0.0277902	298
10	0.0222222	0.977778	2	0	9
13	0.0255467	0.974453	2	0.8504	2
29	0.0477689	0.952231	2	0	15
38	0.0699911	0.930009	2	0	8
40	0.0740734	0.925927	2	0.816297	1
45	0.0820876	0.917912	2	0.639361	4
50	0.0880957	0.911904	2	0.729637	4
59	0.101999	0.898001	2	0.374354	8
61	0.102422	0.897578	2	0.980948	1
63	0.102427	0.897573	2	0.999779	1
73	0.123735	0.876265	2	0.0411524	9
77	0.129473	0.870527	2	0.741792	3
79	0.138308	0.861692	2	0.602419	1
83	0.148838	0.851162	2	0.526142	3
95	0.17106	0.82894	2	0	11
111	0.192557	0.807443	2	0.0326616	15
157	0.214779	0.785221	2	0	45
180	0.237001	0.762999	2	0	22
182	0.240002	0.759998	2	0.864961	1
188	0.257087	0.742913	2	0.231166	5
190	0.262273	0.737727	2	0.766659	1
194	0.271958	0.728042	2	0.564169	3
196	0.272385	0.727615	2	0.98077	1
198	0.275471	0.724529	2	0.861137	1
203	0.295444	0.704556	2	0.101201	4
219	0.317667	0.682333	2	0	15
231	0.331413	0.668587	2	0.381417	11
235	0.343804	0.656196	2	0.442391	3
237	0.346643	0.653357	2	0.872235	1
246	0.365246	0.634754	2	0.162862	8
248	0.365924	0.634076	2	0.969495	1
250	0.369733	0.630267	2	0.828591	1
272	0.391956	0.608044	2	0	21
275	0.393776	0.606224	2	0.918091	2
283	0.403864	0.596136	2	0.546018	7
293	0.426087	0.573913	2	0	9
297	0.448309	0.551691	2	0	3
301	0.465273	0.534727	2	0.236618	3
307	0.472709	0.527291	2	0.665366	5
310	0.479553	0.520447	2	0.692047	2
338	0.501775	0.498225	2	0	27
340	0.501807	0.498193	2	0.998545	1
343	0.504462	0.495538	2	0.88051	2
345	0.504593	0.495407	2	0.994145	1
385	0.526815	0.473185	2	0	39
426	0.549037	0.450963	2	0	40
428	0.549184	0.450816	2	0.993373	1
430	0.549387	0.450613	2	0.990859	1
432	0.549612	0.450388	2	0.989907	1
458	0.571834	0.428166	2	0	25
469	0.587567	0.412433	2	0.292013	10
472	0.592922	0.407078	2	0.759008	2
474	0.592925	0.407075	2	0.999877	1
486	0.60579	0.39421	2	0.421087	11
517	0.624139	0.375861	2	0.174306	30
519	0.624503	0.375497	2	0.983614	1
522	0.624561	0.375439	2	0.997363	2
524	0.624606	0.375394	2	0.998001	1
531	0.630908	0.369092	2	0.716382	6
576	0.653131	0.346869	2	0	44
578	0.653392	0.346608	2	0.988249	1
583	0.657019	0.342981	2	0.836752	4
585	0.658303	0.341697	2	0.94224	1
602	0.677423	0.322577	2	0.139608	16
605	0.678849	0.321151	2	0.935806	2
607	0.678988	0.321012	2	0.993738	1
609	0.679021	0.320979	2	0.998537	1
612	0.680456	0.319544	2	0.93543	2
614	0.680551	0.319449	2	0.995706	1
645	0.69626	0.30374	2	0.293105	30
659	0.716454	0.283546	2	0.0912614	13
661	0.716492	0.283508	2	0.998282	1
665	0.718826	0.281174	2	0.895009	3
711	0.741048	0.258952	2	0	45
719	0.743828	0.256172	2	0.874872	7
721	0.743849	0.256151	2	0.999083	1
731	0.747691	0.252309	2	0.827085	9
777	0.769914	0.230086	2	0	45
790	0.786381	0.213619	2	0.258961	12
860	0.805232	0.194768	2	0.151689	69
866	0.80568	0.19432	2	0.979871	5
879	0.818904	0.181096	2	0.40491	12
931	0.834549	0.165451	2	0.295976	51
1016	0.848229	0.151771	2	0.384385	84
1018	0.848238	0.151762	2	0.999601	1
1021	0.848397	0.151603	2	0.992841	2
1045	0.8558	0.1442	2	0.666893	23
1047	0.855801	0.144199	2	0.999917	1
1050	0.856721	0.143279	2	0.958609	2
1113	0.878943	0.121057	2	0	62
1115	0.878967	0.121033	2	0.998923	1
1158	0.893378	0.106622	2	0.351526	42
1160	0.89356	0.10644	2	0.99182	1
1163	0.89356	0.10644	2	0.999982	2
1165	0.893597	0.106403	2	0.998318	1
1173	0.894415	0.105585	2	0.963197	7
1177	0.895671	0.104329	2	0.943489	3
1183	0.896486	0.103514	2	0.963351	5
1185	0.896486	0.103514	2	0.999992	1
1187	0.896829	0.103171	2	0.984563	1
1279	0.912192	0.0878075	2	0.308633	91
1281	0.912222	0.0877778	2	0.998661	1
1390	0.931553	0.068447	2	0.130117	108
1514	0.946795	0.053205	2	0.314107	123
1660	0.963166	0.0368344	2	0.263323	145
1662	0.963166	0.0368342	2	0.99999	1
1667	0.963378	0.0366223	2	0.990468	4
1669	0.963384	0.0366158	2	0.999704	1
1736	0.963703	0.0362968	2	0.985649	66
1740	0.965411	0.034589	2	0.923147	3
1742	0.965412	0.0345877	2	0.999943	1
16	0.0222222	0.977778	3	0	15
20	0.0241797	0.97582	3	0.911914	3
23	0.027369	0.972631	3	0.856479	2
26	0.0295028	0.970497	3	0.903981	2
28	0.0327151	0.967285	3	0.855446	1
42	0.0549373	0.945063	3	0	13
51	0.0716078	0.928392	3	0.249831	8
56	0.0937736	0.906226	3	0.00253485	4
66	0.115996	0.884004	3	0	9
68	0.121642	0.878358	3	0.745914	1
70	0.122271	0.877729	3	0.971714	1
72	0.123348	0.876652	3	0.951512	1
74	0.127444	0.872556	3	0.815689	1
85	0.149666	0.850334	3	0	10
88	0.155169	0.844831	3	0.752395	2
92	0.160083	0.839917	3	0.778874	3
94	0.16119	0.83881	3	0.950181	1
97	0.164879	0.835121	3	0.83396	2
107	0.187102	0.812898	3	0	9
121	0.209324	0.790676	3	0	13
125	0.217131	0.782869	3	0.648668	3
136	0.239353	0.760647	3	0	10
138	0.247089	0.752911	3	0.651914	1
143	0.257633	0.742367	3	0.525527	4
145	0.258767	0.741233	3	0.948935	1
149	0.26779	0.73221	3	0.594	3
175	0.290012	0.709988	3	0	25
199	0.312234	0.687766	3	0	23
202	0.315186	0.684814	3	0.867168	2
205	0.316365	0.683635	3	0.946926	2
213	0.3336	0.6664	3	0.224456	7
215	0.336173	0.663827	3	0.884212	1
233	0.355052	0.644948	3	0.150408	17
235	0.355892	0.644108	3	0.962229	1
241	0.360834	0.639166	3	0.777613	5
243	0.361416	0.638584	3	0.973783	1
246	0.363227	0.636773	3	0.918534	2
257	0.381711	0.618289	3	0.168193	10
277	0.403933	0.596067	3	0	19
282	0.417438	0.582562	3	0.392291	4
286	0.418855	0.581145	3	0.93626	3
315	0.441077	0.558923	3	0	28
317	0.4411	0.5589	3	0.998972	1
319	0.442161	0.557839	3	0.952248	1
333	0.464383	0.535617	3	0	13
348	0.486605	0.513395	3	0	14
350	0.495803	0.504197	3	0.586079	1
362	0.518026	0.481974	3	0	11
367	0.526174	0.473826	3	0.633304	4
369	0.529049	0.470951	3	0.870661	1
372	0.540922	0.459078	3	0.465697	2
374	0.54119	0.45881	3	0.987954	1
378	0.544453	0.455547	3	0.853138	3
380	0.544483	0.455517	3	0.998654	1
428	0.560732	0.439268	3	0.2688	47
461	0.582954	0.417046	3	0	32
498	0.605177	0.394823	3	0	36
500	0.608701	0.391299	3	0.841395	1
541	0.630923	0.369077	3	0	40
555	0.65031	0.34969	3	0.127619	13
557	0.651227	0.348773	3	0.958708	1
566	0.658191	0.341809	3	0.686616	8
569	0.659728	0.340272	3	0.930845	2
571	0.660078	0.339922	3	0.984253	1
573	0.66094	0.33906	3	0.961189	1
609	0.683163	0.316837	3	0	35
611	0.684656	0.315344	3	0.932813	1
613	0.68483	0.31517	3	0.992165	1
615	0.685303	0.314697	3	0.97869	1
643	0.707526	0.292474	3	0	27
645	0.708004	0.291996	3	0.978487	1
650	0.713067	0.286933	3	0.77215	4
684	0.729296	0.270704	3	0.269683	33
736	0.7438	0.2562	3	0.347328	51
797	0.759922	0.240078	3	0.274497	60
799	0.760676	0.239324	3	0.966108	1
817	0.777072	0.222928	3	0.26218	17
824	0.786305	0.213695	3	0.584482	6
888	0.802686	0.197314	3	0.262849	63
890	0.802689	0.197311	3	0.999902	1
894	0.802839	0.197161	3	0.993249	3
914	0.816288	0.183712	3	0.394775	19
964	0.833476	0.166524	3	0.226551	49
1000	0.855698	0.144302	3	0	35
1002	0.856087	0.143913	3	0.982502	1
1006	0.856134	0.143866	3	0.9979	3
1133	0.874858	0.125142	3	0.157382	126
1135	0.879561	0.120439	3	0.788386	1
1231	0.893824	0.106176	3	0.358162	95
1246	0.894277	0.105723	3	0.979606	14
1470	0.910869	0.0891312	3	0.253379	223
1472	0.91098	0.0890204	3	0.995016	1
1532	0.933202	0.0667982	3	0	59
1534	0.934016	0.0659838	3	0.963351	1
1548	0.935289	0.0647112	3	0.942735	13
1863	0.948333	0.0516667	3	0.412998	314
1865	0.948333	0.0516667	3	1	1
2	0.00154904	0.998451	4	0.930293	1
6	0.0216336	0.978366	4	0.0961948	3
16	0.0438558	0.956144	4	0	9
18	0.0521111	0.947889	4	0.628512	1
20	0.0582588	0.941741	4	0.723355	1
25	0.076758	0.923242	4	0.167537	4
27	0.0813611	0.918639	4	0.792859	1
30	0.0849918	0.915008	4	0.836617	2
32	0.0869192	0.913081	4	0.91327	1
37	0.107002	0.892998	4	0.0962907	4
39	0.11188	0.88812	4	0.780466	1
41	0.113587	0.886413	4	0.92318	1
47	0.119799	0.880201	4	0.720481	5
55	0.142021	0.857979	4	0	7
72	0.164243	0.835757	4	0	16
76	0.171769	0.828231	4	0.661318	3
78	0.171795	0.828205	4	0.998858	1
80	0.174985	0.825015	4	0.856428	1
88	0.197208	0.802792	4	0	7
90	0.198749	0.801251	4	0.930644	1
92	0.199366	0.800634	4	0.972209	1
94	0.214004	0.785996	4	0.341293	1
96	0.215065	0.784935	4	0.952263	1
98	0.222216	0.777784	4	0.678209	1
121	0.244438	0.755562	4	0	22
125	0.246645	0.753355	4	0.900696	3
135	0.268867	0.731133	4	0	9
144	0.286619	0.713381	4	0.201185	8
146	0.29578	0.70422	4	0.587736	1
161	0.312943	0.687057	4	0.227676	14
165	0.335165	0.664835	4	0	3
167	0.335393	0.664607	4	0.989742	1
169	0.335526	0.664474	4	0.994018	1
171	0.340802	0.659198	4	0.762557	1
176	0.345117	0.654883	4	0.805864	4
196	0.367339	0.632661	4	0	19
198	0.370384	0.629616	4	0.862958	1
201	0.371696	0.628304	4	0.940984	2
203	0.373514	0.626486	4	0.918168	1
216	0.395736	0.604264	4	0	12
221	0.399238	0.600762	4	0.842432	4
249	0.42146	0.57854	4	0	27
251	0.426719	0.573281	4	0.763339	1
259	0.439257	0.560743	4	0.43578	7
261	0.439814	0.560186	4	0.97496	1
263	0.440149	0.559851	4	0.9849	1
267	0.443649	0.556351	4	0.842532	3
269	0.443815	0.556185	4	0.992519	1
271	0.443961	0.556039	4	0.993445	1
283	0.453151	0.546849	4	0.586455	11
285	0.453215	0.546785	4	0.997113	1
300	0.475437	0.524563	4	0	14
302	0.480563	0.519437	4	0.769341	1
321	0.502785	0.497215	4	0	18
330	0.515469	0.484531	4	0.429206	8
332	0.51798	0.48202	4	0.887006	1
363	0.540202	0.459798	4	0	30
373	0.562425	0.437575	4	0	9
387	0.58197	0.41803	4	0.120452	13
396	0.59496	0.40504	4	0.415439	8
402	0.596913	0.403087	4	0.912134	5
404	0.597966	0.402034	4	0.952626	1
406	0.598558	0.401442	4	0.973353	1
431	0.612094	0.387906	4	0.390896	24
433	0.61298	0.38702	4	0.960099	1
458	0.635202	0.364798	4	0	24
460	0.635286	0.364714	4	0.996232	1
463	0.637422	0.362578	4	0.903884	2
467	0.642068	0.357932	4	0.790932	3
470	0.642068	0.357932	4	1	2
497	0.657746	0.342254	4	0.294496	26
522	0.679968	0.320032	4	0	24
525	0.680608	0.319392	4	0.971222	2
529	0.680865	0.319135	4	0.988408	3
539	0.682986	0.317014	4	0.904584	9
557	0.698764	0.301236	4	0.28996	17
563	0.7	0.3	4	0.944377	5
565	0.700899	0.299101	4	0.959559	1
615	0.723121	0.276879	4	0	49
636	0.745293	0.254707	4	0.00227557	20
679	0.760177	0.239823	4	0.330198	42
692	0.769032	0.230968	4	0.601543	12
694	0.769034	0.230966	4	0.999893	1
724	0.783753	0.216247	4	0.337657	29
756	0.805316	0.194684	4	0.0296627	31
760	0.806191	0.193809	4	0.960617	3
844	0.819034	0.180966	4	0.42208	83
906	0.836277	0.163723	4	0.224071	61
908	0.836428	0.163572	4	0.993213	1
911	0.83663	0.16337	4	0.990884	2
1007	0.855151	0.144849	4	0.166562	95
1036	0.865659	0.134341	4	0.52716	28
1038	0.865687	0.134313	4	0.998722	1
1040	0.86569	0.13431	4	0.999848	1
1042	0.865938	0.134062	4	0.988841	1
1044	0.86594	0.13406	4	0.999924	1
1125	0.883447	0.116553	4	0.212186	80
1129	0.883486	0.116514	4	0.998246	3
1134	0.883496	0.116504	4	0.999561	4
1136	0.883503	0.116497	4	0.999683	1
1188	0.902868	0.0971319	4	0.128562	51
1228	0.910122	0.0898781	4	0.67358	39
1347	0.924376	0.0756244	4	0.358585	118
1349	0.924389	0.0756115	4	0.99942	1
1359	0.927335	0.0726645	4	0.867385	9
1392	0.928641	0.0713586	4	0.941234	32
1394	0.928644	0.0713565	4	0.999904	1
1518	0.944842	0.055158	4	0.271071	123
1520	0.944843	0.0551566	4	0.999937	1
1522	0.944921	0.055079	4	0.996507	1
1599	0.96073	0.0392705	4	0.288615	76
1614	0.963261	0.0367395	4	0.886106	14
1618	0.963281	0.0367194	4	0.999095	3
1901	0.979292	0.0207084	4	0.279507	282
2	0.00102302	0.998977	5	0.953964	1
10	0.0216246	0.978375	5	0.0729282	7
14	0.0306559	0.969344	5	0.593593	3
32	0.0528781	0.947122	5	0	17
34	0.0556926	0.944307	5	0.87335	1
52	0.0779148	0.922085	5	0	17
68	0.100137	0.899863	5	0	15
70	0.101126	0.898874	5	0.955489	1
75	0.108303	0.891697	5	0.677026	4
81	0.114551	0.885449	5	0.718848	5
83	0.115393	0.884607	5	0.962095	1
87	0.122937	0.877063	5	0.660539	3
91	0.136322	0.863678	5	0.397683	3
93	0.137222	0.862778	5	0.959492	1
105	0.159444	0.840556	5	0	11
107	0.163746	0.836254	5	0.806423	1
123	0.185968	0.814032	5	0	15
127	0.188768	0.811232	5	0.874021	3
141	0.21099	0.78901	5	0	13
145	0.232839	0.767161	5	0.0167836	3
156	0.255061	0.744939	5	0	10
158	0.268757	0.731243	5	0.383718	1
172	0.290979	0.709021	5	0	13
174	0.291002	0.708998	5	0.998946	1
176	0.291367	0.708633	5	0.98357	1
188	0.30542	0.69458	5	0.367639	11
193	0.311321	0.688679	5	0.734459	4
212	0.331363	0.668637	5	0.0980883	18
215	0.336807	0.663193	5	0.755009	2
222	0.343863	0.656137	5	0.682507	6
235	0.366085	0.633915	5	0	12
237	0.369518	0.630482	5	0.845517	1
247	0.382585	0.617415	5	0.411997	9
256	0.396495	0.603505	5	0.37403	8
282	0.418717	0.581283	5	0	25
290	0.438379	0.561621	5	0.115247	7
292	0.443137	0.556863	5	0.785864	1
313	0.465359	0.534641	5	0	20
315	0.468383	0.531617	5	0.863933	1
317	0.46887	0.53113	5	0.978106	1
344	0.491092	0.508908	5	0	26
363	0.513314	0.486686	5	0	18
369	0.527309	0.472691	5	0.37023	5
380	0.534235	0.465765	5	0.688352	10
403	0.543919	0.456081	5	0.56422	22
421	0.563513	0.436487	5	0.118265	17
423	0.567998	0.432002	5	0.798175	1
429	0.574125	0.425875	5	0.724282	5
431	0.574162	0.425838	5	0.998304	1
464	0.596385	0.403615	5	0	32
466	0.604325	0.395675	5	0.642689	1
469	0.60534	0.39466	5	0.95431	2
471	0.609408	0.390592	5	0.816941	1
485	0.623975	0.376025	5	0.344495	13
487	0.624389	0.375611	5	0.981386	1
489	0.625071	0.374929	5	0.969302	1
491	0.625432	0.374568	5	0.983749	1
512	0.64486	0.35514	5	0.125738	20
524	0.651611	0.348389	5	0.696182	11
528	0.655369	0.344631	5	0.830894	3
563	0.677592	0.322408	5	0	34
585	0.69362	0.30638	5	0.27871	21
615	0.715842	0.284158	5	0	29
623	0.716562	0.283438	5	0.967619	7
625	0.716832	0.283168	5	0.987837	1
628	0.717009	0.282991	5	0.992061	2
630	0.717203	0.282797	5	0.99127	1
671	0.734757	0.265243	5	0.210081	40
682	0.751208	0.248792	5	0.259691	10
684	0.753459	0.246541	5	0.898716	1
686	0.753496	0.246504	5	0.998327	1
712	0.77487	0.22513	5	0.0381429	25
715	0.777752	0.222248	5	0.870326	2
719	0.779119	0.220881	5	0.938486	3
773	0.798125	0.201875	5	0.144722	53
852	0.820347	0.179653	5	0	78
855	0.820416	0.179584	5	0.996927	2
873	0.833528	0.166472	5	0.409929	17
905	0.85275	0.14725	5	0.135025	31
911	0.85403	0.14597	5	0.942424	5
1032	0.867015	0.132985	5	0.415644	120
1085	0.884576	0.115424	5	0.209774	52
1155	0.906798	0.093202	5	0	69
1499	0.919653	0.0803467	5	0.421512	343
1558	0.936429	0.0635709	5	0.245089	58
1568	0.938257	0.0617426	5	0.917727	9
1572	0.945219	0.0547812	5	0.686735	3
1828	0.959147	0.0408527	5	0.373221	255
1831	0.959694	0.0403064	5	0.975413	2
1833	0.959694	0.0403064	5	1	1
1858	0.96273	0.0372703	5	0.863376	24
8	0.0222222	0.977778	6	0	7
23	0.0444444	0.955556	6	0	14
25	0.0510884	0.948912	6	0.701022	1
36	0.0733106	0.926689	6	0	10
40	0.0918919	0.908108	6	0.163843	3
42	0.093541	0.906459	6	0.92579	1
44	0.0940726	0.905927	6	0.97608	1
84	0.116295	0.883705	6	0	39
86	0.117958	0.882042	6	0.925143	1
99	0.134503	0.865497	6	0.255472	12
103	0.138031	0.861969	6	0.841251	3
109	0.160253	0.839747	6	0	5
111	0.161296	0.838704	6	0.953068	1
116	0.176251	0.823749	6	0.327054	4
118	0.176806	0.823194	6	0.975012	1
139	0.199028	0.800972	6	0	20
148	0.220639	0.779361	6	0.0275005	8
158	0.235766	0.764234	6	0.319272	9
162	0.243938	0.756062	6	0.632286	3
176	0.260611	0.739389	6	0.249703	13
180	0.276965	0.723035	6	0.264083	3
182	0.277954	0.722046	6	0.955488	1
186	0.291648	0.708352	6	0.383778	3
203	0.313026	0.686974	6	0.0379679	16
232	0.335249	0.664751	6	0	28
234	0.335414	0.664586	6	0.992538	1
236	0.337026	0.662974	6	0.927464	1
239	0.340104	0.659896	6	0.861514	2
245	0.359336	0.640664	6	0.134539	5
249	0.362389	0.637611	6	0.862639	3
263	0.384611	0.615389	6	0	13
265	0.386091	0.613909	6	0.933393	1
267	0.389685	0.610315	6	0.838271	1
288	0.411907	0.588093	6	0	20
291	0.41532	0.58468	6	0.846439	2
301	0.426385	0.573615	6	0.502077	9
306	0.448607	0.551393	6	0	4
339	0.470829	0.529171	6	0	32
341	0.47135	0.52865	6	0.976542	1
390	0.488064	0.511936	6	0.247879	48
393	0.488426	0.511574	6	0.983718	2
396	0.489688	0.510312	6	0.943219	2
431	0.51191	0.48809	6	0	34
443	0.528505	0.471495	6	0.253223	11
461	0.535703	0.464297	6	0.676105	17
477	0.55474	0.44526	6	0.143336	15
517	0.576962	0.423038	6	0	39
519	0.578911	0.421089	6	0.912285	1
537	0.601133	0.398867	6	0	17
558	0.623356	0.376644	6	0	20
567	0.645578	0.354422	6	0	8
572	0.646433	0.353567	6	0.961505	4
582	0.66219	0.33781	6	0.290965	9
584	0.662699	0.337301	6	0.977059	1
588	0.663039	0.336961	6	0.984718	3
590	0.663527	0.336473	6	0.978062	1
603	0.685749	0.314251	6	0	12
606	0.686561	0.313439	6	0.96347	2
645	0.708783	0.291217	6	0	38
647	0.709011	0.290989	6	0.989713	1
649	0.711548	0.288452	6	0.885854	1
673	0.727552	0.272448	6	0.279838	23
675	0.727561	0.272439	6	0.999583	1
677	0.728497	0.271503	6	0.957889	1
728	0.750719	0.249281	6	0	50
732	0.751289	0.248711	6	0.974353	3
781	0.76675	0.23325	6	0.304255	48
825	0.782139	0.217861	6	0.307491	43
834	0.785636	0.214364	6	0.842624	8
841	0.796219	0.203781	6	0.523784	6
846	0.800984	0.199016	6	0.785564	4
848	0.800991	0.199009	6	0.99966	1
868	0.823214	0.176786	6	0	19
870	0.823225	0.176775	6	0.999492	1
872	0.824016	0.175984	6	0.964404	1
880	0.825168	0.174832	6	0.948176	7
882	0.825178	0.174822	6	0.999544	1
886	0.826455	0.173545	6	0.942546	3
896	0.826663	0.173337	6	0.990606	9
899	0.827416	0.172584	6	0.966134	2
929	0.840321	0.159679	6	0.419283	29
931	0.840565	0.159435	6	0.989018	1
996	0.856986	0.143014	6	0.261021	64
999	0.85699	0.14301	6	0.999841	2
1001	0.857219	0.142781	6	0.989682	1
1054	0.87675	0.12325	6	0.121121	52
1056	0.87716	0.12284	6	0.981538	1
1058	0.877939	0.122061	6	0.964951	1
1136	0.897897	0.102103	6	0.101896	77
1138	0.897915	0.102085	6	0.999206	1
1140	0.898078	0.101922	6	0.992657	1
1205	0.913819	0.0861807	6	0.29163	64
1208	0.915296	0.0847042	6	0.933558	2
1326	0.934676	0.0653241	6	0.127895	117
1328	0.934741	0.0652594	6	0.997089	1
1354	0.937017	0.0629831	6	0.897567	25
1357	0.937078	0.0629217	6	0.997238	2
1459	0.952061	0.0479389	6	0.325775	101
1493	0.95591	0.0440897	6	0.826783	33
1819	0.976627	0.0233729	6	0.0677442	325
6	0.0174807	0.982519	7	0.21337	5
12	0.0197671	0.980233	7	0.897111	5
21	0.0386822	0.961318	7	0.148821	8
34	0.0609044	0.939096	7	0	12
40	0.0827583	0.917242	7	0.0165756	5
45	0.0998352	0.900165	7	0.231538	4
50	0.107607	0.892393	7	0.650282	4
52	0.107843	0.892157	7	0.989383	1
68	0.130065	0.869935	7	0	15
70	0.132757	0.867243	7	0.878875	1
86	0.154979	0.845021	7	0	15
96	0.176823	0.823177	7	0.0170175	9
104	0.196473	0.803527	7	0.115738	7
129	0.218695	0.781305	7	0	24
131	0.222507	0.777493	7	0.82848	1
136	0.229272	0.770728	7	0.695552	4
148	0.251495	0.748505	7	0	11
150	0.25533	0.74467	7	0.827413	1
159	0.269965	0.730035	7	0.341402	8
175	0.292188	0.707812	7	0	15
189	0.308077	0.691923	7	0.284964	13
206	0.3303	0.6697	7	0	16
208	0.330954	0.669046	7	0.970541	1
210	0.333273	0.666727	7	0.895653	1
212	0.335354	0.664646	7	0.906346	1
223	0.353496	0.646504	7	0.183605	10
229	0.370038	0.629962	7	0.255636	5
231	0.37378	0.62622	7	0.831595	1
236	0.386894	0.613106	7	0.40987	4
238	0.388598	0.611402	7	0.923318	1
240	0.390875	0.609125	7	0.897536	1
244	0.404092	0.595908	7	0.405219	3
246	0.405713	0.594287	7	0.927081	1
269	0.427935	0.572065	7	0	22
275	0.431563	0.568437	7	0.836736	5
295	0.453785	0.546215	7	0	19
305	0.467571	0.532429	7	0.379656	9
307	0.470082	0.529918	7	0.886979	1
309	0.472101	0.527899	7	0.909162	1
311	0.47342	0.52658	7	0.94065	1
326	0.492073	0.507927	7	0.160592	14
328	0.492397	0.507603	7	0.985443	1
330	0.494809	0.505191	7	0.891434	1
332	0.494915	0.505085	7	0.995231	1
337	0.50476	0.49524	7	0.55701	4
339	0.51391	0.48609	7	0.588211	1
342	0.515077	0.484923	7	0.947521	2
346	0.517146	0.482854	7	0.906884	3
348	0.520379	0.479621	7	0.854518	1
350	0.525762	0.474238	7	0.757778	1
390	0.547984	0.452016	7	0	39
392	0.548175	0.451825	7	0.991409	1
408	0.56879	0.43121	7	0.0723047	15
421	0.587704	0.412296	7	0.148867	12
440	0.609926	0.390074	7	0	18
442	0.611228	0.388772	7	0.94145	1
454	0.619461	0.380539	7	0.629493	11
456	0.62142	0.37858	7	0.911849	1
458	0.621784	0.378216	7	0.983625	1
486	0.641082	0.358918	7	0.131588	27
488	0.641086	0.358914	7	0.999838	1
497	0.650129	0.349871	7	0.593032	8
506	0.664835	0.335165	7	0.338257	8
510	0.66984	0.33016	7	0.774766	3
524	0.68192	0.31808	7	0.4564	13
531	0.685391	0.314609	7	0.843781	6
533	0.686162	0.313838	7	0.965341	1
564	0.701222	0.298778	7	0.322269	30
567	0.703488	0.296512	7	0.898057	2
570	0.703884	0.296116	7	0.982185	2
613	0.726106	0.273894	7	0	42
615	0.730501	0.269499	7	0.802201	1
647	0.745267	0.254733	7	0.335546	31
649	0.745451	0.254549	7	0.991697	1
651	0.745536	0.254464	7	0.996193	1
655	0.747193	0.252807	7	0.925436	3
662	0.748931	0.251069	7	0.921783	6
684	0.771153	0.228847	7	0	21
690	0.776339	0.223661	7	0.766634	5
779	0.798562	0.201438	7	0	88
781	0.799417	0.200583	7	0.961517	1
783	0.799501	0.200499	7	0.996212	1
822	0.813816	0.186184	7	0.355804	38
825	0.815818	0.184182	7	0.909923	2
828	0.816295	0.183705	7	0.978528	2
835	0.817455	0.182545	7	0.947829	6
837	0.817684	0.182316	7	0.989697	1
900	0.833743	0.166257	7	0.277336	62
909	0.840163	0.159837	7	0.711089	8
911	0.853022	0.146978	7	0.421332	1
952	0.875245	0.124755	7	0	40
955	0.880135	0.119865	7	0.779924	2
1029	0.902357	0.0976427	7	0	73
1035	0.902724	0.0972765	7	0.98352	5
1111	0.91769	0.0823102	7	0.326519	75
1158	0.924462	0.0755381	7	0.695257	46
1160	0.924471	0.0755288	7	0.999581	1
1163	0.92448	0.0755203	7	0.999618	2
1178	0.925341	0.0746595	7	0.961261	14
1256	0.944499	0.0555014	7	0.137885	77
1260	0.944721	0.0552787	7	0.989982	3
1262	0.944738	0.0552623	7	0.999261	1
1264	0.944769	0.055231	7	0.998591	1
1273	0.944905	0.0550952	7	0.993889	8
1281	0.945531	0.0544692	7	0.971832	7
1283	0.945531	0.0544689	7	0.999984	1
1427	0.958883	0.0411165	7	0.399145	143
1606	0.973255	0.0267454	7	0.353297	178
6	0.020884	0.979116	8	0.0602221	5
8	0.0243461	0.975654	8	0.844205	1
18	0.0453129	0.954687	8	0.0564931	9
21	0.0519011	0.948099	8	0.703532	2
27	0.0659551	0.934045	8	0.36757	5
41	0.0881773	0.911823	8	0	13
43	0.0883515	0.911648	8	0.99216	1
56	0.110574	0.889426	8	0	12
58	0.115117	0.884883	8	0.795569	1
60	0.11577	0.88423	8	0.970586	1
65	0.122939	0.877061	8	0.677412	4
103	0.145161	0.854839	8	0	37
108	0.154087	0.845913	8	0.598345	4
110	0.155049	0.844951	8	0.956711	1
117	0.170165	0.829835	8	0.319765	6
120	0.171323	0.828677	8	0.94791	2
122	0.171607	0.828393	8	0.987194	1
127	0.176411	0.823589	8	0.783822	4
139	0.198633	0.801367	8	0	11
149	0.219161	0.780839	8	0.0762529	9
172	0.241383	0.758617	8	0	22
178	0.256431	0.743569	8	0.322863	5
191	0.271374	0.728626	8	0.327554	12
210	0.293596	0.706404	8	0	18
214	0.298899	0.701101	8	0.761383	3
226	0.321121	0.678879	8	0	11
231	0.322592	0.677408	8	0.933818	4
243	0.337226	0.662774	8	0.341467	11
263	0.359448	0.640552	8	0	19
290	0.38167	0.61833	8	0	26
295	0.391609	0.608391	8	0.552756	4
297	0.393336	0.606664	8	0.922298	1
311	0.408884	0.591116	8	0.300318	13
323	0.429117	0.570883	8	0.0895462	11
326	0.437769	0.562231	8	0.610656	2
329	0.43903	0.56097	8	0.943233	2
338	0.461252	0.538748	8	0	8
356	0.482213	0.517787	8	0.0567691	17
384	0.504435	0.495565	8	0	27
390	0.513498	0.486502	8	0.592189	5
406	0.531769	0.468231	8	0.177794	15
408	0.532048	0.467952	8	0.987426	1
412	0.534577	0.465423	8	0.886196	3
419	0.547139	0.452861	8	0.434727	6
421	0.551186	0.448814	8	0.8179	1
458	0.573408	0.426592	8	0	36
488	0.591041	0.408959	8	0.206505	29
509	0.61154	0.38846	8	0.0775366	20
511	0.612039	0.387961	8	0.977543	1
534	0.632911	0.367089	8	0.0607736	22
570	0.655133	0.344867	8	0	35
583	0.675807	0.324193	8	0.0696911	12
587	0.676734	0.323266	8	0.95826	3
662	0.696717	0.303283	8	0.100804	74
691	0.718939	0.281061	8	0	28
705	0.731249	0.268751	8	0.446044	13
707	0.731264	0.268736	8	0.999314	1
756	0.751195	0.248805	8	0.10309	48
758	0.751249	0.248751	8	0.997586	1
782	0.770138	0.229862	8	0.150005	23
811	0.782842	0.217158	8	0.428323	28
880	0.796977	0.203023	8	0.363937	68
882	0.797262	0.202738	8	0.987143	1
885	0.797632	0.202368	8	0.983358	2
916	0.800472	0.199528	8	0.872213	30
918	0.800475	0.199525	8	0.999862	1
920	0.800535	0.199465	8	0.997278	1
922	0.805189	0.194811	8	0.790588	1
950	0.827411	0.172589	8	0	27
978	0.840506	0.159494	8	0.410741	27
1068	0.862728	0.137272	8	0	89
1070	0.862728	0.137272	8	1	1
1148	0.878776	0.121224	8	0.277819	77
1150	0.878856	0.121144	8	0.996404	1
1152	0.879072	0.120928	8	0.990291	1
1154	0.880593	0.119407	8	0.931556	1
1172	0.88571	0.11429	8	0.769752	17
1174	0.885714	0.114286	8	0.999815	1
1231	0.904256	0.0957443	8	0.165615	56
1326	0.918724	0.0812758	8	0.348917	94
1328	0.918903	0.0810971	8	0.991958	1
1337	0.92273	0.0772699	8	0.827778	8
1339	0.922795	0.0772049	8	0.997076	1
1341	0.922975	0.0770249	8	0.991897	1
1343	0.923005	0.0769945	8	0.998635	1
1348	0.923394	0.0766062	8	0.982528	4
1350	0.923395	0.0766052	8	0.999954	1
1463	0.945617	0.054383	8	0	112
1473	0.945836	0.0541636	8	0.990128	9
1666	0.964432	0.0355678	8	0.16319	192
1678	0.965614	0.0343864	8	0.946834	11
1866	0.981251	0.0187492	8	0.296326	187
1933	0.982446	0.0175538	8	0.946209	66
15	0.0222222	0.977778	9	0	14
26	0.0444444	0.955556	9	0	10
28	0.0464681	0.953532	9	0.908937	1
40	0.0686903	0.93131	9	0	11
44	0.0843146	0.915685	9	0.296906	3
51	0.0963852	0.903615	9	0.456822	6
75	0.118607	0.881393	9	0	23
83	0.13285	0.86715	9	0.359088	7
85	0.136999	0.863001	9	0.813276	1
89	0.149975	0.850025	9	0.416118	3
99	0.172197	0.827803	9	0	9
101	0.174685	0.825315	9	0.888012	1
103	0.177069	0.822931	9	0.892732	1
105	0.182156	0.817844	9	0.771094	1
121	0.204378	0.795622	9	0	15
125	0.210332	0.789668	9	0.732077	3
127	0.211147	0.788853	9	0.963341	1
129	0.214025	0.785975	9	0.870487	1
159	0.236247	0.763753	9	0	29
177	0.258469	0.741531	9	0	17
180	0.261361	0.738639	9	0.869854	2
190	0.274994	0.725006	9	0.38654	9
192	0.27616	0.72384	9	0.947515	1
194	0.279706	0.720294	9	0.840441	1
209	0.301928	0.698072	9	0	14
212	0.304258	0.695742	9	0.895128	2
214	0.310422	0.689578	9	0.722643	1
216	0.315619	0.684381	9	0.766139	1
220	0.322939	0.677061	9	0.670613	3
223	0.323022	0.676978	9	0.996253	2
225	0.323095	0.676905	9	0.9967	1
248	0.345317	0.654683	9	0	22
252	0.348376	0.651624	9	0.862375	3
278	0.370598	0.629402	9	0	25
292	0.39282	0.60718	9	0	13
294	0.393579	0.606421	9	0.965874	1
296	0.393653	0.606347	9	0.996667	1
317	0.415875	0.584125	9	0	20
326	0.438097	0.561903	9	0	8
328	0.441169	0.558831	9	0.861769	1
334	0.444852	0.555148	9	0.834249	5
360	0.467074	0.532926	9	0	25
381	0.485323	0.514677	9	0.178807	20
385	0.487405	0.512595	9	0.906322	3
400	0.5059	0.4941	9	0.167737	14
413	0.508968	0.491032	9	0.861917	12
415	0.509968	0.490032	9	0.955026	1
418	0.511308	0.488692	9	0.939695	2
420	0.512578	0.487422	9	0.942826	1
422	0.514309	0.485691	9	0.922119	1
437	0.535884	0.464116	9	0.0291031	14
485	0.558107	0.441893	9	0	47
487	0.561285	0.438715	9	0.85696	1
504	0.583507	0.416493	9	0	16
508	0.586791	0.413209	9	0.852262	3
523	0.609013	0.390987	9	0	14
525	0.610027	0.389973	9	0.954369	1
527	0.612574	0.387426	9	0.885382	1
596	0.634796	0.365204	9	0	68
600	0.639576	0.360424	9	0.784921	3
629	0.658785	0.341215	9	0.135598	28
632	0.667033	0.332967	9	0.628822	2
634	0.667461	0.332539	9	0.980733	1
660	0.688429	0.311571	9	0.0564213	25
662	0.696915	0.303085	9	0.618131	1
700	0.715098	0.284902	9	0.181773	37
706	0.718907	0.281093	9	0.8286	5
708	0.719492	0.280508	9	0.973688	1
710	0.722046	0.277954	9	0.885058	1
720	0.725336	0.274664	9	0.851951	9
722	0.725416	0.274584	9	0.996406	1
735	0.744458	0.255542	9	0.143132	12
747	0.749516	0.250484	9	0.772359	11
749	0.749887	0.250113	9	0.983306	1
807	0.772109	0.227891	9	0	57
830	0.788315	0.211685	9	0.27075	22
832	0.79009	0.20991	9	0.920128	1
931	0.812312	0.187688	9	0	98
941	0.815521	0.184479	9	0.855619	9
944	0.816104	0.183896	9	0.973734	2
946	0.816685	0.183315	9	0.973869	1
948	0.821128	0.178872	9	0.800041	1
953	0.825554	0.174446	9	0.80087	4
962	0.827294	0.172706	9	0.921683	8
964	0.827645	0.172355	9	0.984188	1
1039	0.843265	0.156735	9	0.297108	74
1102	0.859346	0.140654	9	0.276369	62
1110	0.862627	0.137373	9	0.852346	7
1219	0.884849	0.115151	9	0	108
1221	0.88485	0.11515	9	0.999949	1
1262	0.904039	0.0959611	9	0.136516	40
1264	0.905012	0.0949876	9	0.956195	1
1335	0.923591	0.0764089	9	0.163955	70
1360	0.926608	0.0733916	9	0.864222	24
1362	0.926608	0.0733915	9	0.999998	1
1367	0.926988	0.0730125	9	0.982944	4
1562	0.943075	0.056925	9	0.276063	194
1567	0.943373	0.0566267	9	0.986577	4
1569	0.943379	0.0566211	9	0.999746	1
1782	0.960965	0.0390355	9	0.208648	212
1784	0.960965	0.0390354	9	1	1
1786	0.960966	0.0390337	9	0.999922	1
10	0.0222222	0.977778	10	0	9
20	0.0442757	0.955724	10	0.0075929	9
24	0.062035	0.937965	10	0.200833	3
40	0.0842572	0.915743	10	0	15
47	0.105978	0.894022	10	0.0225523	6
49	0.107643	0.892357	10	0.925107	1
51	0.107793	0.892207	10	0.99325	1
58	0.124333	0.875667	10	0.255662	6
68	0.143191	0.856809	10	0.151424	9
72	0.156685	0.843315	10	0.392759	3
74	0.156974	0.843026	10	0.986971	1
76	0.160799	0.839201	10	0.82788	1
83	0.17318	0.82682	10	0.44288	6
104	0.195402	0.804598	10	0	20
123	0.217624	0.782376	10	0	18
125	0.22838	0.77162	10	0.515978	1
137	0.247252	0.752748	10	0.15076	11
139	0.247691	0.752309	10	0.980269	1
148	0.267886	0.732114	10	0.0912143	8
150	0.267938	0.732062	10	0.99767	1
155	0.281516	0.718484	10	0.388963	4
167	0.292219	0.707781	10	0.518368	11
169	0.301372	0.698628	10	0.588121	1
172	0.309954	0.690046	10	0.613796	2
183	0.332177	0.667823	10	0	10
194	0.354399	0.645601	10	0	10
196	0.354999	0.645001	10	0.97301	1
200	0.359475	0.640525	10	0.798569	3
212	0.381697	0.618303	10	0	11
228	0.403919	0.596081	10	0	15
245	0.426142	0.573858	10	0	16
270	0.448364	0.551636	10	0	24
272	0.449762	0.550238	10	0.937082	1
277	0.462667	0.537333	10	0.419252	4
279	0.463157	0.536843	10	0.977979	1
290	0.477233	0.522767	10	0.366564	10
293	0.479888	0.520112	10	0.880541	2
304	0.497722	0.502278	10	0.197456	10
320	0.519944	0.480056	10	0	15
332	0.535053	0.464947	10	0.320121	11
334	0.535713	0.464287	10	0.97028	1
342	0.548504	0.451496	10	0.424429	7
353	0.561697	0.438303	10	0.406291	10
355	0.56425	0.43575	10	0.885147	1
357	0.564638	0.435362	10	0.982522	1
359	0.569748	0.430252	10	0.770033	1
361	0.570303	0.429697	10	0.97504	1
365	0.576565	0.423435	10	0.718223	3
368	0.578547	0.421453	10	0.910785	2
381	0.593642	0.406358	10	0.320729	12
383	0.595204	0.404796	10	0.929717	1
385	0.595256	0.404744	10	0.997663	1
400	0.598431	0.401569	10	0.85712	14
402	0.598967	0.401033	10	0.975865	1
404	0.600562	0.399438	10	0.928233	1
441	0.620237	0.379763	10	0.114618	36
472	0.64246	0.35754	10	0	30
474	0.644642	0.355358	10	0.901779	1
476	0.644905	0.355095	10	0.988194	1
495	0.653953	0.346047	10	0.592843	18
521	0.674495	0.325505	10	0.075571	25
570	0.696718	0.303282	10	0	48
572	0.696952	0.303048	10	0.98944	1
614	0.713504	0.286496	10	0.255192	41
656	0.735726	0.264274	10	0	41
669	0.736634	0.263366	10	0.959131	12
685	0.74356	0.25644	10	0.68832	15
692	0.75291	0.24709	10	0.579277	6
694	0.753032	0.246968	10	0.994518	1
696	0.753074	0.246926	10	0.998092	1
698	0.753468	0.246532	10	0.982269	1
703	0.753548	0.246452	10	0.996396	4
719	0.768766	0.231234	10	0.315174	15
721	0.770919	0.229081	10	0.903113	1
786	0.793142	0.206858	10	0	64
836	0.810643	0.189357	10	0.212455	49
838	0.810846	0.189154	10	0.990829	1
840	0.813101	0.186899	10	0.898534	1
877	0.828811	0.171189	10	0.293059	36
886	0.837855	0.162145	10	0.593021	8
888	0.838284	0.161716	10	0.980674	1
914	0.853799	0.146201	10	0.301855	25
947	0.872276	0.127724	10	0.168526	32
952	0.873029	0.126971	10	0.96613	4
954	0.876235	0.123765	10	0.8557	1
957	0.876612	0.123388	10	0.983063	2
961	0.877059	0.122941	10	0.979868	3
971	0.87909	0.12091	10	0.908608	9
978	0.879851	0.120149	10	0.965733	6
980	0.880182	0.119818	10	0.985121	1
991	0.886998	0.113002	10	0.693265	10
994	0.887029	0.112971	10	0.998619	2
1049	0.901838	0.098162	10	0.333604	54
1051	0.901846	0.098154	10	0.999637	1
1056	0.904756	0.0952444	10	0.869071	4
1058	0.905371	0.0946289	10	0.972301	1
1172	0.927593	0.0724067	10	0	113
1183	0.929551	0.0704492	10	0.911914	10
1187	0.930486	0.0695143	10	0.957931	3
1193	0.932178	0.0678222	10	0.923853	5
1322	0.952227	0.0477726	10	0.097767	128
1324	0.952228	0.0477722	10	0.999984	1
1477	0.966827	0.0331727	10	0.343024	152
1482	0.9673	0.0326997	10	0.978715	4
1775	0.984189	0.015811	10	0.240008	292
9	0.0164997	0.9835	11	0.257511	8
11	0.0177595	0.982241	11	0.943311	1
13	0.018297	0.981703	11	0.97581	1
20	0.0341199	0.96588	11	0.287972	6
29	0.0563421	0.943658	11	0	8
31	0.0587137	0.941286	11	0.893276	1
34	0.06881	0.93119	11	0.545667	2
45	0.0910323	0.908968	11	0	10
47	0.0923501	0.90765	11	0.940697	1
49	0.102873	0.897127	11	0.526461	1
51	0.104786	0.895214	11	0.913916	1
71	0.127008	0.872992	11	0	19
85	0.149231	0.850769	11	0	13
91	0.163828	0.836172	11	0.343111	5
93	0.163836	0.836164	11	0.999663	1
95	0.166468	0.833532	11	0.881523	1
99	0.175526	0.824474	11	0.59241	3
103	0.184852	0.815148	11	0.580327	3
106	0.192617	0.807383	11	0.650563	2
113	0.212203	0.787797	11	0.118654	6
129	0.232054	0.767946	11	0.106685	15
131	0.233188	0.766812	11	0.948981	1
146	0.250938	0.749062	11	0.201266	14
148	0.251257	0.748743	11	0.985613	1
158	0.261511	0.738489	11	0.538584	9
161	0.273809	0.726191	11	0.446612	2
165	0.276324	0.723676	11	0.886806	3
174	0.291845	0.708155	11	0.301542	8
176	0.294224	0.705776	11	0.892977	1
178	0.294323	0.705677	11	0.995531	1
182	0.306025	0.693975	11	0.473396	3
184	0.306457	0.693543	11	0.980573	1
197	0.323576	0.676424	11	0.229658	12
207	0.3425	0.6575	11	0.148416	9
209	0.345551	0.654449	11	0.862682	1
235	0.367773	0.632227	11	0	25
237	0.368721	0.631279	11	0.957378	1
276	0.390943	0.609057	11	0	38
278	0.394515	0.605485	11	0.839266	1
293	0.416737	0.583263	11	0	14
300	0.425349	0.574651	11	0.612455	6
316	0.447571	0.552429	11	0	15
324	0.461116	0.538884	11	0.390484	7
326	0.463578	0.536422	11	0.889193	1
328	0.463632	0.536368	11	0.997582	1
354	0.483869	0.516131	11	0.0893464	25
370	0.506091	0.493909	11	0	15
372	0.506521	0.493479	11	0.980655	1
386	0.526637	0.473363	11	0.0947857	13
388	0.526679	0.473321	11	0.99811	1
412	0.548901	0.451099	11	0	23
418	0.551554	0.448446	11	0.880638	5
422	0.551664	0.448336	11	0.995043	3
446	0.56659	0.43341	11	0.328301	23
450	0.569973	0.430027	11	0.847793	3
452	0.570988	0.429012	11	0.954307	1
460	0.589135	0.410865	11	0.183401	7
477	0.608327	0.391673	11	0.136332	16
480	0.611201	0.388799	11	0.870709	2
486	0.613772	0.386228	11	0.88429	5
496	0.626584	0.373416	11	0.423439	9
518	0.648807	0.351193	11	0	21
538	0.671023	0.328977	11	0.000244762	19
577	0.693246	0.306754	11	0	38
581	0.703604	0.296396	11	0.533881	3
583	0.706878	0.293122	11	0.852649	1
585	0.709473	0.290527	11	0.883222	1
594	0.71827	0.28173	11	0.604171	8
596	0.718391	0.281609	11	0.994524	1
638	0.740613	0.259387	11	0	41
673	0.762836	0.237164	11	0	34
675	0.769342	0.230658	11	0.707193	1
679	0.773329	0.226671	11	0.820621	3
736	0.795551	0.204449	11	0	56
815	0.812427	0.187573	11	0.240569	78
826	0.81541	0.18459	11	0.865788	10
829	0.815648	0.184352	11	0.989253	2
896	0.837871	0.162129	11	0	66
954	0.851754	0.148246	11	0.375263	57
1005	0.870841	0.129159	11	0.141055	50
1013	0.871253	0.128747	11	0.981489	7
1017	0.87163	0.12837	11	0.983036	3
1098	0.891973	0.108027	11	0.0845395	80
1104	0.892535	0.107465	11	0.97472	5
1106	0.893312	0.106688	11	0.965017	1
1129	0.9008	0.0992	11	0.663061	22
1223	0.921506	0.0784945	11	0.0682487	93
1225	0.921631	0.0783695	11	0.994376	1
1230	0.922627	0.0773727	11	0.955147	4
1244	0.924528	0.0754724	11	0.914485	13
1247	0.924658	0.075342	11	0.99413	2
1249	0.930179	0.0698207	11	0.751541	1
1389	0.945451	0.054549	11	0.312774	139
1497	0.960707	0.0392929	11	0.313477	107
1502	0.960709	0.0392911	11	0.999917	4
1506	0.960709	0.0392911	11	1	3
1508	0.960727	0.0392726	11	0.99917	1
1510	0.961031	0.0389686	11	0.986318	1
1706	0.975326	0.0246744	11	0.35676	195
1709	0.975327	0.0246725	11	0.999917	2
1713	0.975414	0.024586	11	0.996105	3
1715	0.975414	0.024586	11	1	1
1719	0.975494	0.0245064	11	0.996421	3
1721	0.975499	0.0245014	11	0.999774	1
1723	0.975553	0.0244475	11	0.997573	1
1729	0.975681	0.0243189	11	0.994213	5
1731	0.975708	0.024292	11	0.998791	1
15	0.0222222	0.977778	12	0	14
26	0.0444444	0.955556	12	0	10
40	0.0666667	0.933333	12	0	13
51	0.0888889	0.911111	12	0	10
66	0.111111	0.888889	12	0	14
75	0.133333	0.866667	12	0	8
77	0.135682	0.864318	12	0.89431	1
79	0.137758	0.862242	12	0.906571	1
86	0.152952	0.847048	12	0.316274	6
96	0.175174	0.824826	12	0	9
101	0.197397	0.802603	12	0	4
108	0.218579	0.781421	12	0.0467974	6
110	0.220121	0.779879	12	0.930605	1
113	0.223221	0.776779	12	0.860476	2
122	0.238687	0.761313	12	0.304055	8
126	0.252585	0.747415	12	0.374578	3
128	0.253043	0.746957	12	0.9794	1
134	0.269852	0.730148	12	0.243596	5
150	0.291429	0.708571	12	0.0290395	15
156	0.299987	0.700013	12	0.61488	5
158	0.302868	0.697132	12	0.870375	1
169	0.317884	0.682116	12	0.324275	10
185	0.340106	0.659894	12	0	15
189	0.344678	0.655322	12	0.794268	3
199	0.357731	0.642269	12	0.412621	9
208	0.377244	0.622756	12	0.121888	8
211	0.383167	0.616833	12	0.73348	2
220	0.397668	0.602332	12	0.347471	8
222	0.399978	0.600022	12	0.896044	1
225	0.403276	0.596724	12	0.851599	2
227	0.407166	0.592834	12	0.824948	1
229	0.407968	0.592032	12	0.9639	1
232	0.409518	0.590482	12	0.930245	2
238	0.417173	0.582827	12	0.655528	5
240	0.418101	0.581899	12	0.958249	1
258	0.440323	0.559677	12	0	17
278	0.462545	0.537455	12	0	19
280	0.464117	0.535883	12	0.929265	1
282	0.465233	0.534767	12	0.949784	1
284	0.471715	0.528285	12	0.708308	1
306	0.493937	0.506063	12	0	21
309	0.49435	0.50565	12	0.981441	2
322	0.509759	0.490241	12	0.306557	12
326	0.511846	0.488154	12	0.90608	3
329	0.512523	0.487477	12	0.969569	2
342	0.530818	0.469182	12	0.176723	12
346	0.533284	0.466716	12	0.889036	3
361	0.550832	0.449168	12	0.210308	14
363	0.551902	0.448098	12	0.951845	1
373	0.568831	0.431169	12	0.238218	9
375	0.572068	0.427932	12	0.854346	1
377	0.57347	0.42653	12	0.936887	1
403	0.595692	0.404308	12	0	25
437	0.617915	0.382085	12	0	33
445	0.632533	0.367467	12	0.342156	7
447	0.633914	0.366086	12	0.937894	1
449	0.634264	0.365736	12	0.984241	1
456	0.641888	0.358112	12	0.656914	6
458	0.642349	0.357651	12	0.97927	1
494	0.66377	0.33623	12	0.0360525	35
496	0.674254	0.325746	12	0.528197	1
498	0.674701	0.325299	12	0.979909	1
519	0.691597	0.308403	12	0.239671	20
549	0.711301	0.288699	12	0.113296	29
551	0.714109	0.285891	12	0.873652	1
553	0.715661	0.284339	12	0.930174	1
560	0.728257	0.271743	12	0.433172	6
562	0.730561	0.269439	12	0.896299	1
566	0.731355	0.268645	12	0.964303	3
568	0.731402	0.268598	12	0.997878	1
570	0.732328	0.267672	12	0.958311	1
574	0.734321	0.265679	12	0.910346	3
602	0.756543	0.243457	12	0	27
605	0.756689	0.243311	12	0.993425	2
607	0.757417	0.242583	12	0.967213	1
609	0.759202	0.240798	12	0.919711	1
646	0.775089	0.224911	12	0.28507	36
648	0.775252	0.224748	12	0.992681	1
651	0.775768	0.224232	12	0.976781	2
653	0.776346	0.223654	12	0.973951	1
688	0.798569	0.201431	12	0	34
690	0.799234	0.200766	12	0.97006	1
693	0.802218	0.197782	12	0.865726	2
722	0.820663	0.179337	12	0.169962	28
781	0.838731	0.161269	12	0.186945	58
787	0.839566	0.160434	12	0.962407	5
790	0.83977	0.16023	12	0.990835	2
829	0.860077	0.139923	12	0.0861836	38
831	0.860115	0.139885	12	0.998309	1
833	0.862543	0.137457	12	0.890746	1
838	0.863868	0.136132	12	0.940345	4
840	0.863902	0.136098	12	0.998463	1
844	0.864045	0.135955	12	0.993569	3
921	0.87792	0.12208	12	0.375655	76
926	0.881493	0.118507	12	0.839199	4
1080	0.899339	0.100661	12	0.196927	153
1084	0.899345	0.100655	12	0.999732	3
1088	0.901658	0.0983422	12	0.895925	3
1179	0.921158	0.0788424	12	0.122509	90
1183	0.921158	0.0788416	12	0.999965	3
1280	0.936096	0.063904	12	0.327809	96
1348	0.949301	0.050699	12	0.405775	67
1352	0.949427	0.0505728	12	0.99432	3
1354	0.949501	0.0504992	12	0.996689	1
1660	0.971723	0.028277	12	0	305
1987	0.986868	0.0131322	12	0.318483	326
1989	0.986868	0.0131319	12	0.999987	1
1991	0.986925	0.0130747	12	0.997428	1
1995	0.986953	0.0130468	12	0.998746	3
1997	0.986953	0.0130468	12	0.999999	1
20	0.0222222	0.977778	13	0	19
23	0.0257254	0.974275	13	0.842358	2
31	0.0442785	0.955721	13	0.165107	7
38	0.056196	0.943804	13	0.463716	6
43	0.063605	0.936395	13	0.666595	4
61	0.0858272	0.914173	13	0	17
63	0.0879056	0.912094	13	0.90647	1
65	0.0890706	0.910929	13	0.947575	1
67	0.0900658	0.909934	13	0.955218	1
76	0.112288	0.887712	13	0	8
100	0.13451	0.86549	13	0	23
105	0.139071	0.860929	13	0.794747	4
109	0.147827	0.852173	13	0.605981	3
128	0.17005	0.82995	13	0	18
131	0.170357	0.829643	13	0.986156	2
144	0.189717	0.810283	13	0.128793	12
148	0.196683	0.803317	13	0.68654	3
150	0.21447	0.78553	13	0.199596	1
161	0.236692	0.763308	13	0	10
166	0.249552	0.750448	13	0.421295	4
169	0.260492	0.739508	13	0.507702	2
190	0.282714	0.717286	13	0	20
212	0.304937	0.695063	13	0	21
233	0.327159	0.672841	13	0	20
256	0.343408	0.656592	13	0.268798	22
258	0.347432	0.652568	13	0.818924	1
263	0.351384	0.648616	13	0.822147	4
289	0.373606	0.626394	13	0	25
312	0.395828	0.604172	13	0	22
315	0.411195	0.588805	13	0.308499	2
330	0.432034	0.567966	13	0.0622594	14
342	0.447549	0.552451	13	0.301839	11
344	0.449452	0.550548	13	0.914323	1
353	0.46309	0.53691	13	0.386308	8
418	0.485312	0.514688	13	0	64
440	0.507535	0.492465	13	0	21
442	0.507555	0.492445	13	0.999101	1
444	0.508669	0.491331	13	0.949861	1
449	0.514249	0.485751	13	0.748893	4
452	0.52026	0.47974	13	0.729483	2
454	0.520452	0.479548	13	0.991364	1
476	0.542674	0.457326	13	0	21
478	0.542714	0.457286	13	0.998245	1
480	0.54294	0.45706	13	0.989793	1
491	0.565163	0.434837	13	0	10
514	0.587385	0.412615	13	0	22
516	0.587472	0.412528	13	0.996056	1
518	0.587927	0.412073	13	0.979531	1
520	0.588304	0.411696	13	0.983056	1
531	0.600865	0.399135	13	0.434729	10
537	0.602424	0.397576	13	0.929856	5
540	0.602535	0.397465	13	0.995007	2
551	0.613146	0.386854	13	0.522506	10
553	0.613401	0.386599	13	0.988528	1
566	0.635623	0.364377	13	0	12
585	0.657845	0.342155	13	0	18
645	0.680068	0.319932	13	0	59
650	0.680812	0.319188	13	0.9665	4
658	0.691389	0.308611	13	0.524053	7
679	0.707739	0.292261	13	0.264238	20
687	0.71343	0.28657	13	0.743896	7
691	0.713989	0.286011	13	0.974838	3
745	0.73068	0.26932	13	0.248918	53
758	0.745942	0.254058	13	0.313213	12
810	0.766847	0.233153	13	0.0592584	51
812	0.766849	0.233151	13	0.999928	1
819	0.767225	0.232775	13	0.983083	6
827	0.774387	0.225613	13	0.677707	7
829	0.774404	0.225596	13	0.999218	1
833	0.777659	0.222341	13	0.853554	3
835	0.777661	0.222339	13	0.999876	1
837	0.780835	0.219165	13	0.85719	1
872	0.797784	0.202216	13	0.237295	34
876	0.798836	0.201164	13	0.952683	3
878	0.79884	0.20116	13	0.9998	1
880	0.79983	0.20017	13	0.955454	1
900	0.812886	0.187114	13	0.412471	19
933	0.825531	0.174469	13	0.430978	32
940	0.829125	0.170875	13	0.838273	6
943	0.829321	0.170679	13	0.991199	2
991	0.846331	0.153669	13	0.23453	47
1065	0.868553	0.131447	13	0	73
1067	0.868838	0.131162	13	0.987206	1
1069	0.869056	0.130944	13	0.990172	1
1074	0.869092	0.130908	13	0.998396	4
1087	0.869137	0.130863	13	0.99794	12
1089	0.869144	0.130856	13	0.999692	1
1097	0.874036	0.125964	13	0.779873	7
1104	0.874274	0.125726	13	0.989276	6
1106	0.874274	0.125726	13	1	1
1110	0.877725	0.122275	13	0.844719	3
1118	0.880685	0.119315	13	0.86679	7
1120	0.880689	0.119311	13	0.999838	1
1234	0.902911	0.0970891	13	0	113
1236	0.902919	0.0970806	13	0.999621	1
1422	0.920567	0.0794327	13	0.205845	185
1515	0.940079	0.0599209	13	0.121967	92
1640	0.956893	0.0431068	13	0.243363	124
1642	0.956894	0.0431061	13	0.99997	1
1920	0.973513	0.0264874	13	0.252158	277
1922	0.973513	0.0264874	13	1	1
2	0.00170127	0.998299	14	0.923443	1
4	0.00289852	0.997101	14	0.946124	1
8	0.0126879	0.987312	14	0.55948	3
26	0.0349101	0.96509	14	0	17
40	0.0571323	0.942868	14	0	13
44	0.0718913	0.928109	14	0.335847	3
46	0.0766003	0.9234	14	0.788095	1
50	0.0928332	0.907167	14	0.269518	3
69	0.115055	0.884945	14	0	18
74	0.118187	0.881813	14	0.859067	4
76	0.122353	0.877647	14	0.812557	1
78	0.131376	0.868624	14	0.593944	1
99	0.153598	0.846402	14	0	20
114	0.173758	0.826242	14	0.0927984	14
118	0.182096	0.817904	14	0.624815	3
122	0.196304	0.803696	14	0.360642	3
124	0.196335	0.803665	14	0.998612	1
129	0.206516	0.793484	14	0.541845	4
131	0.211246	0.788754	14	0.787123	1
135	0.219731	0.780269	14	0.61822	3
137	0.226896	0.773104	14	0.677563	1
141	0.239259	0.760741	14	0.443671	3
154	0.261481	0.738519	14	0	12
182	0.283703	0.716297	14	0	27
201	0.305925	0.694075	14	0	18
207	0.323252	0.676748	14	0.220295	5
231	0.345474	0.654526	14	0	23
242	0.363343	0.636657	14	0.195921	10
244	0.364496	0.635504	14	0.948081	1
247	0.366011	0.633989	14	0.931842	2
249	0.369723	0.630277	14	0.832981	1
273	0.391945	0.608055	14	0	23
275	0.392367	0.607633	14	0.980991	1
281	0.401252	0.598748	14	0.600192	5
291	0.409241	0.590759	14	0.640474	9
307	0.431464	0.568536	14	0	15
336	0.453686	0.546314	14	0	28
338	0.453761	0.546239	14	0.99664	1
344	0.460863	0.539137	14	0.680379	5
346	0.461175	0.538825	14	0.985951	1
348	0.46166	0.53834	14	0.978214	1
350	0.464846	0.535154	14	0.856618	1
353	0.465345	0.534655	14	0.977526	2
360	0.466887	0.533113	14	0.930603	6
362	0.468413	0.531587	14	0.931367	1
364	0.468828	0.531172	14	0.981304	1
367	0.469356	0.530644	14	0.976219	2
369	0.471703	0.528297	14	0.894427	1
371	0.472912	0.527088	14	0.945555	1
385	0.495135	0.504865	14	0	13
398	0.509107	0.490893	14	0.371232	12
401	0.51375	0.48625	14	0.791069	2
427	0.535972	0.464028	14	0	25
429	0.535997	0.464003	14	0.998911	1
431	0.53691	0.46309	14	0.958877	1
451	0.559133	0.440867	14	0	19
469	0.576582	0.423418	14	0.214796	17
471	0.576668	0.423332	14	0.996122	1
477	0.578877	0.421123	14	0.900601	5
514	0.601099	0.398901	14	0	36
546	0.623024	0.376976	14	0.0133905	31
553	0.62581	0.37419	14	0.874591	6
555	0.628023	0.371977	14	0.900441	1
577	0.642562	0.357438	14	0.345733	21
579	0.642758	0.357242	14	0.991166	1
582	0.648678	0.351322	14	0.733598	2
588	0.659039	0.340961	14	0.53376	5
606	0.670997	0.329003	14	0.461885	17
608	0.685141	0.314859	14	0.36356	1
670	0.707363	0.292637	14	0	61
673	0.707732	0.292268	14	0.983387	2
675	0.70787	0.29213	14	0.993798	1
722	0.728641	0.271359	14	0.0652971	46
757	0.750863	0.249137	14	0	34
759	0.75089	0.24911	14	0.998781	1
817	0.773113	0.226887	14	0	57
821	0.775521	0.224479	14	0.891598	3
823	0.775998	0.224002	14	0.978543	1
834	0.776576	0.223424	14	0.973993	10
836	0.776741	0.223259	14	0.992601	1
838	0.78142	0.21858	14	0.789415	1
876	0.799603	0.200397	14	0.181775	37
879	0.800852	0.199148	14	0.943781	2
907	0.816196	0.183804	14	0.309534	27
928	0.824827	0.175173	14	0.611614	20
936	0.828836	0.171164	14	0.819577	7
998	0.850424	0.149576	14	0.0285627	61
1008	0.856397	0.143603	14	0.731187	9
1070	0.872908	0.127092	14	0.257046	61
1072	0.873119	0.126881	14	0.9905	1
1122	0.894273	0.105727	14	0.0480653	49
1124	0.895045	0.104955	14	0.965265	1
1126	0.895652	0.104348	14	0.972675	1
1128	0.895956	0.104044	14	0.986308	1
1130	0.895958	0.104042	14	0.999911	1
1188	0.91616	0.0838399	14	0.0909087	57
1234	0.92939	0.0706096	14	0.404638	45
1284	0.942659	0.0573407	14	0.4029	49
1453	0.959038	0.0409621	14	0.26296	168
1458	0.959047	0.0409528	14	0.999584	4
1631	0.972933	0.0270669	14	0.375132	172
1944	0.992165	0.00783538	14	0.134583	312
1954	0.992389	0.00761061	14	0.989885	9
24	0.0222222	0.977778	15	0	23
34	0.0444444	0.955556	15	0	9
36	0.0500258	0.949974	15	0.74884	1
39	0.0522268	0.947773	15	0.900952	2
48	0.0691072	0.930893	15	0.240385	8
58	0.0913294	0.908671	15	0	9
62	0.0974117	0.902588	15	0.726295	3
64	0.0977895	0.90221	15	0.983	1
71	0.113748	0.886252	15	0.281871	6
87	0.13597	0.86403	15	0	15
89	0.1392	0.8608	15	0.854643	1
110	0.161423	0.838577	15	0	20
113	0.164395	0.835605	15	0.86625	2
116	0.168482	0.831518	15	0.816085	2
136	0.190704	0.809296	15	0	19
138	0.191099	0.808901	15	0.982226	1
147	0.212443	0.787557	15	0.0395141	8
152	0.224632	0.775368	15	0.451513	4
155	0.232082	0.767918	15	0.664738	2
157	0.234228	0.765772	15	0.903408	1
178	0.256451	0.743549	15	0	20
197	0.278673	0.721327	15	0	18
213	0.298255	0.701745	15	0.118821	15
222	0.315529	0.684471	15	0.222641	8
224	0.31701	0.68299	15	0.933347	1
226	0.318246	0.681754	15	0.944412	1
228	0.322052	0.677948	15	0.828737	1
246	0.343569	0.656431	15	0.0317079	17
257	0.356595	0.643405	15	0.41383	10
283	0.378817	0.621183	15	0	25
285	0.378875	0.621125	15	0.997413	1
287	0.379229	0.620771	15	0.984056	1
296	0.392276	0.607724	15	0.412876	8
309	0.407806	0.592194	15	0.301189	12
312	0.408817	0.591183	15	0.954507	2
314	0.408824	0.591176	15	0.999659	1
318	0.409821	0.590179	15	0.955142	3
320	0.413469	0.586531	15	0.835827	1
327	0.427485	0.572515	15	0.36928	6
329	0.428499	0.571501	15	0.954395	1
339	0.439941	0.560059	15	0.485111	9
346	0.441032	0.558968	15	0.950884	6
352	0.445205	0.554795	15	0.812224	5
356	0.445484	0.554516	15	0.987431	3
363	0.456625	0.543375	15	0.498645	6
398	0.478848	0.521152	15	0	34
400	0.480052	0.519948	15	0.945783	1
419	0.495533	0.504467	15	0.303383	18
449	0.517755	0.482245	15	0	29
488	0.539977	0.460023	15	0	38
490	0.542719	0.457281	15	0.876608	1
511	0.564942	0.435058	15	0	20
513	0.566902	0.433098	15	0.911779	1
515	0.567007	0.432993	15	0.995292	1
523	0.577286	0.422714	15	0.537443	7
571	0.599508	0.400492	15	0	47
573	0.602251	0.397749	15	0.876554	1
624	0.624473	0.375527	15	0	50
626	0.625709	0.374291	15	0.944421	1
641	0.639817	0.360183	15	0.365128	14
645	0.639986	0.360014	15	0.992363	3
647	0.640941	0.359059	15	0.957066	1
651	0.644586	0.355414	15	0.835937	3
654	0.65119	0.34881	15	0.702859	2
663	0.65969	0.34031	15	0.617494	8
665	0.661957	0.338043	15	0.89795	1
669	0.662226	0.337774	15	0.987894	3
675	0.663741	0.336259	15	0.931848	5
708	0.684923	0.315077	15	0.0468047	32
710	0.685647	0.314353	15	0.967405	1
767	0.70787	0.29213	15	0	56
771	0.708787	0.291213	15	0.958701	3
792	0.723656	0.276344	15	0.330921	20
842	0.745878	0.254122	15	0	49
902	0.7681	0.2319	15	0	59
913	0.769179	0.230821	15	0.951444	10
946	0.791401	0.208599	15	0	32
953	0.799753	0.200247	15	0.624202	6
958	0.800583	0.199417	15	0.962614	4
974	0.810536	0.189464	15	0.552111	15
976	0.81054	0.18946	15	0.999851	1
979	0.811165	0.188835	15	0.971882	2
982	0.811204	0.188796	15	0.99821	2
984	0.81144	0.18856	15	0.989376	1
1011	0.832568	0.167432	15	0.0492747	26
1021	0.836959	0.163041	15	0.802403	9
1071	0.845671	0.154329	15	0.607932	49
1073	0.850149	0.149851	15	0.79851	1
1108	0.86607	0.13393	15	0.283551	34
1114	0.867111	0.132889	15	0.953156	5
1117	0.870216	0.129784	15	0.860258	2
1123	0.871142	0.128858	15	0.958364	5
1125	0.871219	0.128781	15	0.996532	1
1127	0.871226	0.128774	15	0.999665	1
1129	0.871385	0.128615	15	0.992839	1
1131	0.871665	0.128335	15	0.987408	1
1134	0.871738	0.128262	15	0.996728	2
1183	0.885603	0.114397	15	0.37607	48
1185	0.886438	0.113562	15	0.962419	1
1187	0.88794	0.11206	15	0.932424	1
1201	0.891532	0.108468	15	0.838363	13
1203	0.891556	0.108444	15	0.998917	1
1207	0.89172	0.10828	15	0.992595	3
1216	0.892252	0.107748	15	0.976083	8
1222	0.89274	0.10726	15	0.978045	5
1224	0.89278	0.10722	15	0.998179	1
1402	0.915002	0.0849976	15	0	177
1625	0.937225	0.0627754	15	0	222
1627	0.937294	0.062706	15	0.996877	1
1629	0.937313	0.0626867	15	0.99913	1
1631	0.937567	0.0624328	15	0.988575	1
1634	0.93904	0.0609596	15	0.933706	2
1732	0.954324	0.0456758	15	0.312228	97
1734	0.954324	0.0456758	15	1	1
1736	0.954349	0.0456508	15	0.998875	1
1740	0.954377	0.0456233	15	0.998762	3
1742	0.954951	0.0450491	15	0.974163	1
1745	0.955223	0.0447773	15	0.987767	2
1998	0.968996	0.0310039	15	0.380196	252
8	0.0189632	0.981037	16	0.146656	7
16	0.0385497	0.96145	16	0.118608	7
18	0.0387671	0.961233	16	0.990219	1
30	0.0607356	0.939264	16	0.0114163	11
38	0.0717652	0.928235	16	0.503668	7
40	0.077278	0.922722	16	0.751922	1
59	0.0995002	0.9005	16	0	18
82	0.121722	0.878278	16	0	22
90	0.138555	0.861445	16	0.242546	7
93	0.150285	0.849715	16	0.472138	2
95	0.15296	0.84704	16	0.879612	1
122	0.175183	0.824817	16	0	26
127	0.191266	0.808734	16	0.276252	4
135	0.209981	0.790019	16	0.15783	7
137	0.210239	0.789761	16	0.988393	1
143	0.223683	0.776317	16	0.395003	5
148	0.227641	0.772359	16	0.821905	4
150	0.227946	0.772054	16	0.986254	1
152	0.230181	0.769819	16	0.899434	1
156	0.233185	0.766815	16	0.864826	3
166	0.251905	0.748095	16	0.157589	9
168	0.257764	0.742236	16	0.736349	1
180	0.277094	0.722906	16	0.130128	11
183	0.280749	0.719251	16	0.83554	2
210	0.302971	0.697029	16	0	26
218	0.318983	0.681017	16	0.27946	7
236	0.341206	0.658794	16	0	17
258	0.363428	0.636572	16	0	21
262	0.365043	0.634957	16	0.927303	3
274	0.384877	0.615123	16	0.107466	11
284	0.404198	0.595802	16	0.130593	9
287	0.406116	0.593884	16	0.913678	2
291	0.416783	0.583217	16	0.519989	3
293	0.419539	0.580461	16	0.875983	1
305	0.423046	0.576954	16	0.842155	11
327	0.445269	0.554731	16	0	21
346	0.460992	0.539008	16	0.292424	18
348	0.46383	0.53617	16	0.872309	1
352	0.474131	0.525869	16	0.536479	3
356	0.477206	0.522794	16	0.861622	3
358	0.47801	0.52199	16	0.963788	1
361	0.479654	0.520346	16	0.926047	2
381	0.501876	0.498124	16	0	19
400	0.517541	0.482459	16	0.295084	18
431	0.539763	0.460237	16	0	30
433	0.539863	0.460137	16	0.995498	1
439	0.55314	0.44686	16	0.402519	5
446	0.573854	0.426146	16	0.0678741	6
469	0.592087	0.407913	16	0.17954	22
471	0.59218	0.40782	16	0.995805	1
486	0.609863	0.390137	16	0.204279	14
524	0.632085	0.367915	16	0	37
526	0.63349	0.36651	16	0.936778	1
530	0.63362	0.36638	16	0.99415	3
532	0.633912	0.366088	16	0.986868	1
534	0.634102	0.365898	16	0.991424	1
536	0.635824	0.364176	16	0.922513	1
579	0.658046	0.341954	16	0	42
617	0.680268	0.319732	16	0	37
624	0.68033	0.31967	16	0.997232	6
626	0.681299	0.318701	16	0.956373	1
647	0.700167	0.299833	16	0.150952	20
649	0.703613	0.296387	16	0.84496	1
651	0.705537	0.294463	16	0.91338	1
653	0.705599	0.294401	16	0.99724	1
661	0.721062	0.278938	16	0.304163	7
663	0.721724	0.278276	16	0.970209	1
666	0.726922	0.273078	16	0.766092	2
669	0.727024	0.272976	16	0.995379	2
675	0.731622	0.268378	16	0.79312	5
711	0.753844	0.246156	16	0	35
797	0.772624	0.227376	16	0.154885	85
842	0.77774	0.22226	16	0.769789	44
849	0.781028	0.218972	16	0.852044	6
887	0.797853	0.202147	16	0.242855	37
889	0.797858	0.202142	16	0.999811	1
966	0.808681	0.191319	16	0.512953	76
1010	0.826294	0.173706	16	0.207403	43
1120	0.848516	0.151484	16	0	109
1134	0.853887	0.146113	16	0.758308	13
1149	0.855762	0.144238	16	0.915657	14
1151	0.855778	0.144222	16	0.999274	1
1168	0.859112	0.140888	16	0.84997	16
1170	0.859116	0.140884	16	0.999816	1
1172	0.859128	0.140872	16	0.999447	1
1188	0.868333	0.131667	16	0.585774	15
1190	0.868434	0.131566	16	0.995466	1
1192	0.868434	0.131566	16	0.999996	1
1194	0.868841	0.131159	16	0.981678	1
1271	0.88818	0.11182	16	0.129752	76
1275	0.88928	0.11072	16	0.950484	3
1277	0.889745	0.110255	16	0.979115	1
1279	0.889827	0.110173	16	0.996275	1
1378	0.90917	0.0908299	16	0.129575	98
1382	0.909918	0.0900823	16	0.966357	3
1422	0.923562	0.0764383	16	0.386021	39
1424	0.924155	0.0758448	16	0.973294	1
1426	0.924157	0.0758426	16	0.999899	1
1431	0.924202	0.0757978	16	0.997984	4
1433	0.924315	0.0756849	16	0.994922	1
1480	0.941785	0.0582146	16	0.213838	46
1699	0.964008	0.0359924	16	0	218
1768	0.979051	0.0209493	16	0.32306	68
1770	0.979376	0.0206236	16	0.985344	1
25	0.0222222	0.977778	17	0	24
27	0.0224648	0.977535	17	0.989082	1
42	0.0446871	0.955313	17	0	14
58	0.0669093	0.933091	17	0	15
60	0.0670018	0.932998	17	0.995837	1
77	0.089224	0.910776	17	0	16
83	0.104509	0.895491	17	0.312156	5
88	0.116198	0.883802	17	0.474003	4
90	0.121223	0.878777	17	0.773879	1
93	0.124638	0.875362	17	0.846351	2
96	0.140142	0.859858	17	0.302281	2
104	0.156713	0.843287	17	0.254313	7
110	0.177391	0.822609	17	0.0694954	5
112	0.184086	0.815914	17	0.698733	1
117	0.206308	0.793692	17	0	4
120	0.214641	0.785359	17	0.625036	2
122	0.215183	0.784817	17	0.975582	1
125	0.218659	0.781341	17	0.843589	2
128	0.233284	0.766716	17	0.341865	2
156	0.255507	0.744493	17	0	27
178	0.277729	0.722271	17	0	21
180	0.278258	0.721742	17	0.976199	1
184	0.281941	0.718059	17	0.83427	3
189	0.285775	0.714225	17	0.827468	4
191	0.298801	0.701199	17	0.413819	1
206	0.321023	0.678977	17	0	14
210	0.329262	0.670738	17	0.629234	3
220	0.349593	0.650407	17	0.0851403	9
233	0.364989	0.635011	17	0.307174	12
236	0.366279	0.633721	17	0.941947	2
251	0.388501	0.611499	17	0	14
255	0.394679	0.605321	17	0.72197	3
257	0.394777	0.605223	17	0.995631	1
294	0.416999	0.583001	17	0	36
310	0.431695	0.568305	17	0.338673	15
316	0.447882	0.552118	17	0.271588	5
320	0.450496	0.549504	17	0.882369	3
324	0.454726	0.545274	17	0.809633	3
359	0.476948	0.523052	17	0	34
361	0.477923	0.522077	17	0.956164	1
363	0.478005	0.521995	17	0.996294	1
365	0.478073	0.521927	17	0.99694	1
371	0.481956	0.518044	17	0.825271	5
384	0.504178	0.495822	17	0	12
390	0.509533	0.490467	17	0.759039	5
408	0.524524	0.475476	17	0.32541	17
410	0.53112	0.46888	17	0.70315	1
422	0.548678	0.451322	17	0.209905	11
424	0.550559	0.449441	17	0.915375	1
427	0.558456	0.441544	17	0.644606	2
438	0.576644	0.423356	17	0.181541	10
442	0.577619	0.422381	17	0.95612	3
482	0.599841	0.400159	17	0	39
484	0.599884	0.400116	17	0.998073	1
495	0.618275	0.381725	17	0.172425	10
498	0.618348	0.381652	17	0.996721	2
500	0.622077	0.377923	17	0.832173	1
502	0.622167	0.377833	17	0.995976	1
504	0.625597	0.374403	17	0.845654	1
526	0.640812	0.359188	17	0.315282	21
530	0.654256	0.345744	17	0.395059	3
532	0.65716	0.34284	17	0.869318	1
534	0.65944	0.34056	17	0.897381	1
594	0.681662	0.318338	17	0	59
596	0.682845	0.317155	17	0.946773	1
621	0.698615	0.301385	17	0.290366	24
661	0.720837	0.279163	17	0	39
665	0.722361	0.277639	17	0.931402	3
669	0.728473	0.271527	17	0.724992	3
671	0.728798	0.271202	17	0.985344	1
698	0.743838	0.256162	17	0.323218	26
710	0.76606	0.23394	17	0	11
718	0.767941	0.232059	17	0.915375	7
775	0.789917	0.210083	17	0.0110743	56
805	0.808882	0.191118	17	0.146552	29
827	0.822689	0.177311	17	0.378703	21
832	0.826595	0.173405	17	0.824236	4
844	0.829043	0.170957	17	0.889818	11
846	0.829744	0.170256	17	0.968448	1
850	0.830228	0.169772	17	0.978246	3
852	0.830238	0.169762	17	0.999557	1
857	0.836815	0.163185	17	0.704029	4
919	0.85774	0.14226	17	0.0583784	61
1028	0.872706	0.127294	17	0.326533	108
1046	0.889989	0.110011	17	0.222247	17
1049	0.890083	0.109917	17	0.995784	2
1051	0.890209	0.109791	17	0.994321	1
1053	0.890211	0.109789	17	0.999926	1
1091	0.908115	0.0918847	17	0.194293	37
1095	0.909841	0.090159	17	0.922345	3
1097	0.909841	0.090159	17	0.999999	1
1173	0.923664	0.0763358	17	0.377953	75
1176	0.924044	0.0759559	17	0.982907	2
1178	0.924044	0.0759559	17	1	1
1182	0.924166	0.0758339	17	0.99451	3
1291	0.941554	0.0584461	17	0.217551	108
1299	0.941956	0.0580437	17	0.98189	7
1305	0.942251	0.0577489	17	0.986732	5
1457	0.956158	0.043842	17	0.37419	151
1647	0.975545	0.0244554	17	0.127607	189
1650	0.975546	0.0244542	17	0.999943	2
11	0.0207805	0.97922	18	0.0648794	10
23	0.0430027	0.956997	18	0	11
27	0.0507995	0.9492	18	0.649142	3
29	0.0509283	0.949072	18	0.994205	1
40	0.0725248	0.927475	18	0.0281592	10
42	0.0753985	0.924602	18	0.870684	1
48	0.0899748	0.910025	18	0.344065	5
50	0.100154	0.899846	18	0.541927	1
65	0.122376	0.877624	18	0	14
78	0.144599	0.855401	18	0	12
84	0.157345	0.842655	18	0.426428	5
86	0.157416	0.842584	18	0.996791	1
88	0.158476	0.841524	18	0.952308	1
109	0.180698	0.819302	18	0	20
121	0.20292	0.79708	18	0	11
128	0.225142	0.774858	18	0	6
130	0.225808	0.774192	18	0.970043	1
138	0.241511	0.758489	18	0.293359	7
145	0.257423	0.742577	18	0.283957	6
147	0.265541	0.734459	18	0.634722	1
149	0.26768	0.73232	18	0.903722	1
177	0.289902	0.710098	18	0	27
179	0.290159	0.709841	18	0.988446	1
183	0.297064	0.702936	18	0.689264	3
196	0.312396	0.687604	18	0.310084	12
208	0.322623	0.677377	18	0.539769	11
210	0.323011	0.676989	18	0.982541	1
214	0.326938	0.673062	18	0.823313	3
218	0.331358	0.668642	18	0.801097	3
234	0.35358	0.64642	18	0	15
241	0.370128	0.629872	18	0.25534	6
271	0.39235	0.60765	18	0	29
313	0.414572	0.585428	18	0	41
317	0.42724	0.57276	18	0.429959	3
319	0.427562	0.572438	18	0.985493	1
326	0.432089	0.567911	18	0.796308	6
328	0.441671	0.558329	18	0.568777	1
339	0.457883	0.542117	18	0.270477	10
343	0.463185	0.536815	18	0.761436	3
345	0.464374	0.535626	18	0.946486	1
349	0.477771	0.522229	18	0.397139	3
360	0.49485	0.50515	18	0.231435	10
385	0.509891	0.490109	18	0.32315	24
421	0.53046	0.46954	18	0.0744095	35
423	0.530747	0.469253	18	0.987056	1
428	0.545609	0.454391	18	0.331208	4
459	0.567832	0.432168	18	0	30
462	0.568002	0.431998	18	0.992327	2
470	0.574835	0.425165	18	0.692531	7
488	0.588479	0.411521	18	0.386009	17
492	0.588739	0.411261	18	0.98829	3
494	0.589489	0.410511	18	0.966271	1
496	0.589522	0.410478	18	0.998514	1
498	0.590194	0.409806	18	0.969742	1
502	0.606455	0.393545	18	0.268259	3
521	0.628677	0.371323	18	0	18
525	0.633358	0.366642	18	0.789385	3
528	0.633923	0.366077	18	0.974558	2
530	0.634917	0.365083	18	0.955283	1
533	0.637747	0.362253	18	0.872648	2
535	0.638691	0.361309	18	0.957496	1
548	0.650516	0.349484	18	0.467893	12
619	0.671892	0.328108	18	0.0380544	70
621	0.671893	0.328107	18	0.999966	1
629	0.679497	0.320503	18	0.657839	7
653	0.692034	0.307966	18	0.43581	23
655	0.692126	0.307874	18	0.99588	1
693	0.714348	0.285652	18	0	37
700	0.716709	0.283291	18	0.893764	6
705	0.719909	0.280091	18	0.855975	4
777	0.742132	0.257868	18	0	71
783	0.753101	0.246899	18	0.506363	5
787	0.753143	0.246857	18	0.998135	3
789	0.753718	0.246282	18	0.974132	1
812	0.77594	0.22406	18	0	22
814	0.77612	0.22388	18	0.99191	1
817	0.776227	0.223773	18	0.995171	2
819	0.778027	0.221973	18	0.919009	1
915	0.799984	0.200016	18	0.0119226	95
917	0.801365	0.198635	18	0.93785	1
919	0.801392	0.198608	18	0.998806	1
946	0.823614	0.176386	18	0	26
966	0.837182	0.162818	18	0.389432	19
968	0.837456	0.162544	18	0.987686	1
974	0.841845	0.158155	18	0.802465	5
1044	0.860209	0.139791	18	0.173652	69
1046	0.860903	0.139097	18	0.968756	1
1096	0.883125	0.116875	18	0	49
1144	0.899513	0.100487	18	0.262556	47
1146	0.901397	0.0986028	18	0.915203	1
1150	0.90173	0.0982697	18	0.98501	3
1219	0.923071	0.0769289	18	0.0396628	68
1236	0.929571	0.0704293	18	0.707518	16
1406	0.945022	0.0549775	18	0.304671	169
1408	0.945033	0.0549666	18	0.99951	1
1416	0.947501	0.0524994	18	0.888976	7
1588	0.967395	0.032605	18	0.104753	171
1601	0.96777	0.0322303	18	0.983137	12
1756	0.981263	0.0187367	18	0.392789	154
1792	0.982753	0.0172468	18	0.932954	35
1795	0.982753	0.0172468	18	0.999999	2
1797	0.982762	0.0172383	18	0.999616	1
1799	0.982762	0.0172383	18	0.999999	1
1828	0.983589	0.016411	18	0.962772	28
7	0.0193659	0.980634	19	0.128534	6
12	0.0393464	0.960654	19	0.100879	4
47	0.0615686	0.938431	19	0	34
49	0.0639356	0.936064	19	0.893486	1
51	0.0640219	0.935978	19	0.996114	1
55	0.0736043	0.926396	19	0.568793	3
57	0.0736783	0.926322	19	0.996672	1
74	0.0959005	0.9041	19	0	16
77	0.101651	0.898349	19	0.741225	2
79	0.109474	0.890526	19	0.647969	1
81	0.113175	0.886825	19	0.833459	1
83	0.125422	0.874578	19	0.448887	1
93	0.142167	0.857833	19	0.246475	9
97	0.145579	0.854421	19	0.846461	3
100	0.159039	0.840961	19	0.394296	2
102	0.160536	0.839464	19	0.932616	1
118	0.182759	0.817241	19	0	15
121	0.187128	0.812872	19	0.803369	2
127	0.203386	0.796614	19	0.268389	5
133	0.224266	0.775734	19	0.0603962	5
135	0.232661	0.767339	19	0.622249	1
137	0.235717	0.764283	19	0.862454	1
139	0.239603	0.760397	19	0.825143	1
141	0.243531	0.756469	19	0.823259	1
148	0.252017	0.747983	19	0.61812	6
152	0.259502	0.740498	19	0.66318	3
154	0.259568	0.740432	19	0.997001	1
168	0.281791	0.718209	19	0	13
170	0.282362	0.717638	19	0.974285	1
172	0.282672	0.717328	19	0.986029	1
180	0.288731	0.711269	19	0.727379	7
184	0.292656	0.707344	19	0.823374	3
186	0.294137	0.705863	19	0.933341	1
188	0.307366	0.692634	19	0.404707	1
196	0.319846	0.680154	19	0.438371	7
198	0.325253	0.674747	19	0.756711	1
200	0.332836	0.667164	19	0.658743	1
206	0.343219	0.656781	19	0.532776	5
229	0.365441	0.634559	19	0	22
233	0.372253	0.627747	19	0.693485	3
250	0.394475	0.605525	19	0	16
266	0.416697	0.583303	19	0	15
277	0.424285	0.575715	19	0.658537	10
280	0.437099	0.562901	19	0.423375	2
288	0.44499	0.55501	19	0.644899	7
290	0.446048	0.553952	19	0.9524	1
292	0.446824	0.553176	19	0.965076	1
331	0.469046	0.530954	19	0	38
340	0.483892	0.516108	19	0.331929	8
364	0.506115	0.493885	19	0	23
373	0.510391	0.489609	19	0.807566	8
382	0.528882	0.471118	19	0.167881	8
398	0.550406	0.449594	19	0.0314513	15
400	0.551006	0.448994	19	0.972993	1
406	0.56467	0.43533	19	0.385095	5
408	0.567333	0.432667	19	0.880172	1
410	0.567596	0.432404	19	0.988185	1
422	0.576154	0.423846	19	0.614904	11
430	0.596839	0.403161	19	0.0691531	7
479	0.619061	0.380939	19	0	48
481	0.619457	0.380543	19	0.982174	1
502	0.64168	0.35832	19	0	20
504	0.642741	0.357259	19	0.952237	1
506	0.642899	0.357101	19	0.992898	1
536	0.661275	0.338725	19	0.173088	29
557	0.676224	0.323776	19	0.327298	20
598	0.698446	0.301554	19	0	40
600	0.699301	0.300699	19	0.961537	1
608	0.700876	0.299124	19	0.929126	7
610	0.700887	0.299113	19	0.999463	1
612	0.703217	0.296783	19	0.895176	1
614	0.703405	0.296595	19	0.991538	1
641	0.712162	0.287838	19	0.605944	26
645	0.713641	0.286359	19	0.933415	3
651	0.715044	0.284956	19	0.936871	5
673	0.737267	0.262733	19	0	21
675	0.737303	0.262697	19	0.998375	1
680	0.738341	0.261659	19	0.953278	4
682	0.739065	0.260935	19	0.967413	1
686	0.741364	0.258636	19	0.896546	3
693	0.747999	0.252001	19	0.701405	6
695	0.748323	0.251677	19	0.985431	1
744	0.770545	0.229455	19	0	48
746	0.770574	0.229426	19	0.998704	1
775	0.792796	0.207204	19	0	28
777	0.792797	0.207203	19	0.999964	1
779	0.795514	0.204486	19	0.877761	1
866	0.815749	0.184251	19	0.0893925	86
869	0.816809	0.183191	19	0.952339	2
929	0.837313	0.162687	19	0.0773171	59
945	0.838216	0.161784	19	0.959329	15
951	0.838708	0.161292	19	0.977863	5
968	0.848354	0.151646	19	0.565923	16
974	0.850489	0.149511	19	0.903956	5
1052	0.872711	0.127289	19	0	77
1090	0.885824	0.114176	19	0.409927	37
1095	0.889015	0.110985	19	0.856401	4
1098	0.889064	0.110936	19	0.997796	2
1100	0.889079	0.110921	19	0.999336	1
1168	0.909255	0.0907445	19	0.0920413	67
1257	0.925713	0.074287	19	0.259409	88
1353	0.944575	0.0554254	19	0.151231	95
1626	0.961542	0.0384577	19	0.236454	272
1927	0.983047	0.0169533	19	0.0323024	300
1944	0.984712	0.0152882	19	0.925069	16
1946	0.984712	0.0152882	19	0.999999	1
1954	0.984777	0.0152227	19	0.997054	7
4	0.00748945	0.992511	20	0.662975	3
6	0.00972112	0.990279	20	0.899575	1
8	0.00993448	0.990066	20	0.990399	1
13	0.0223138	0.977686	20	0.442933	4
15	0.0253704	0.97463	20	0.86245	1
26	0.0473228	0.952677	20	0.0121441	10
43	0.069545	0.930455	20	0	16
49	0.0725987	0.927401	20	0.862581	5
51	0.0743787	0.925621	20	0.919902	1
63	0.0966009	0.903399	20	0	11
74	0.113074	0.886926	20	0.258712	10
77	0.114544	0.885456	20	0.933833	2
79	0.127317	0.872683	20	0.425234	1
81	0.130367	0.869633	20	0.862752	1
86	0.136575	0.863425	20	0.720635	4
90	0.148913	0.851087	20	0.444807	3
99	0.168669	0.831331	20	0.110955	8
103	0.184439	0.815561	20	0.290364	3
106	0.185836	0.814164	20	0.937116	2
135	0.208059	0.791941	20	0	28
148	0.22685	0.77315	20	0.15437	12
157	0.24227	0.75773	20	0.306104	8
166	0.263742	0.736258	20	0.0337725	8
168	0.267329	0.732671	20	0.838589	1
171	0.271791	0.728209	20	0.799221	2
175	0.282463	0.717537	20	0.519721	3
177	0.286332	0.713668	20	0.825932	1
[truncated: 18,799 more rows]
