# Supplementary material for: Emergent regulation of ant foraging frequency through a computationally inexpensive forager movement rule
Source: eLife. 2023 Apr 17;12:e77659. doi: 10.7554/eLife.77659 (PMC10110237; doi:10.7554/eLife.77659)
Supplement: Figure 4—source data 2. — Output data from 200 runs of the 2D agent-based model. Data within the file is as described for the 1D model data. Python code for the agent-based model is available on GitHub (Frankel et al., 2022). [file elife-77659-fig4-data2.xlsx]

## Sheet: Forager_data_2D
step	colony state	empty colony state	repeat	crop	trip	position	depth
0	0	1	1	1	0	[0, 0]	0
1	0.00295969	0.99704	1	0.760265	1	[1, 0]	1
2	0.0057463	0.994254	1	0.53455	1	[1, 2]	2.23607
3	0.0066924	0.993308	1	0.457916	1	[1, 3]	3.16228
4	0.00807192	0.991928	1	0.346174	1	[2, 2]	2.82843
5	0.00819385	0.991806	1	0.336298	1	[1, 1]	1.41421
6	0.00819385	0.991806	1	0.336298	1	[0, 0]	0
7	0.00819385	0.991806	1	1	2	[1, 0]	1
8	0.00846118	0.991539	1	0.978347	2	[2, 1]	2.23607
9	0.00913904	0.990861	1	0.92344	2	[1, 0]	1
10	0.0111491	0.988851	1	0.760629	2	[3, 0]	3
11	0.0128068	0.987193	1	0.626352	2	[2, 0]	2
12	0.0152577	0.984742	1	0.427832	2	[3, 0]	3
13	0.0160755	0.983925	1	0.361587	2	[4, 0]	4
14	0.0166765	0.983324	1	0.312908	2	[5, 0]	5
15	0.0182415	0.981758	1	0.186138	2	[6, 0]	6
16	0.0182648	0.981735	1	0.184254	2	[6, 0]	6
17	0.0204638	0.979536	1	0.00613573	2	[6, 0]	6
18	0.0205395	0.97946	1	0	2	[7, 0]	7
19	0.0205395	0.97946	1	0	2	[7, 0]	7
20	0.0205395	0.97946	1	0	2	[6, 0]	6
21	0.0205395	0.97946	1	0	2	[7, 0]	7
22	0.0205395	0.97946	1	0	2	[8, 1]	8.06226
23	0.0205395	0.97946	1	0	2	[9, 0]	9
24	0.0205395	0.97946	1	0	2	[8, 1]	8.06226
25	0.0205395	0.97946	1	0	2	[8, 1]	8.06226
26	0.0205395	0.97946	1	0	2	[7, 0]	7
27	0.0205395	0.97946	1	0	2	[7, 0]	7
28	0.0205395	0.97946	1	0	2	[6, 0]	6
29	0.0205395	0.97946	1	0	2	[7, 0]	7
30	0.0205395	0.97946	1	0	2	[7, 0]	7
31	0.0205395	0.97946	1	0	2	[6, 1]	6.08276
32	0.0205395	0.97946	1	0	2	[5, 0]	5
33	0.0205395	0.97946	1	0	2	[6, 1]	6.08276
34	0.0205395	0.97946	1	0	2	[6, 0]	6
35	0.0205395	0.97946	1	0	2	[6, 0]	6
36	0.0205395	0.97946	1	0	2	[5, 0]	5
37	0.0205395	0.97946	1	0	2	[5, 0]	5
38	0.0205395	0.97946	1	0	2	[5, 0]	5
39	0.0205395	0.97946	1	0	2	[6, 0]	6
40	0.0205395	0.97946	1	0	2	[6, 0]	6
41	0.0205395	0.97946	1	0	2	[6, 0]	6
42	0.0205395	0.97946	1	0	2	[7, 0]	7
43	0.0205395	0.97946	1	0	2	[6, 1]	6.08276
44	0.0205395	0.97946	1	0	2	[7, 0]	7
45	0.0205395	0.97946	1	0	2	[6, 0]	6
46	0.0205395	0.97946	1	0	2	[5, 0]	5
47	0.0205395	0.97946	1	0	2	[5, 0]	5
48	0.0205395	0.97946	1	0	2	[6, 0]	6
49	0.0205395	0.97946	1	0	2	[5, 0]	5
50	0.0205395	0.97946	1	0	2	[5, 0]	5
51	0.0205395	0.97946	1	0	2	[7, 0]	7
52	0.0205395	0.97946	1	0	2	[6, 1]	6.08276
53	0.0205395	0.97946	1	0	2	[5, 0]	5
54	0.0205395	0.97946	1	0	2	[4, 1]	4.12311
55	0.0205395	0.97946	1	0	2	[3, 2]	3.60555
56	0.0205395	0.97946	1	0	2	[2, 1]	2.23607
57	0.0205395	0.97946	1	0	2	[1, 1]	1.41421
58	0.0205395	0.97946	1	0	2	[1, 0]	1
59	0.0205395	0.97946	1	0	2	[2, 0]	2
60	0.0205395	0.97946	1	0	2	[1, 0]	1
61	0.0205395	0.97946	1	0	2	[1, 1]	1.41421
62	0.0205395	0.97946	1	0	2	[1, 2]	2.23607
63	0.0205395	0.97946	1	0	2	[1, 3]	3.16228
64	0.0205395	0.97946	1	0	2	[1, 3]	3.16228
65	0.0205395	0.97946	1	0	2	[1, 4]	4.12311
66	0.0205395	0.97946	1	0	2	[1, 3]	3.16228
67	0.0205395	0.97946	1	0	2	[2, 4]	4.47214
68	0.0205395	0.97946	1	0	2	[3, 3]	4.24264
69	0.0205395	0.97946	1	0	2	[3, 2]	3.60555
70	0.0205395	0.97946	1	0	2	[2, 3]	3.60555
71	0.0205395	0.97946	1	0	2	[2, 3]	3.60555
72	0.0205395	0.97946	1	0	2	[2, 3]	3.60555
73	0.0205395	0.97946	1	0	2	[1, 3]	3.16228
74	0.0205395	0.97946	1	0	2	[1, 2]	2.23607
75	0.0205395	0.97946	1	0	2	[1, 2]	2.23607
76	0.0205395	0.97946	1	0	2	[1, 2]	2.23607
77	0.0205395	0.97946	1	0	2	[1, 2]	2.23607
78	0.0205395	0.97946	1	0	2	[1, 3]	3.16228
79	0.0205395	0.97946	1	0	2	[1, 2]	2.23607
80	0.0205395	0.97946	1	0	2	[1, 3]	3.16228
81	0.0205395	0.97946	1	0	2	[1, 3]	3.16228
82	0.0205395	0.97946	1	0	2	[2, 4]	4.47214
83	0.0205395	0.97946	1	0	2	[3, 3]	4.24264
84	0.0205395	0.97946	1	0	2	[3, 2]	3.60555
85	0.0205395	0.97946	1	0	2	[4, 1]	4.12311
86	0.0205395	0.97946	1	0	2	[4, 0]	4
87	0.0205395	0.97946	1	0	2	[4, 0]	4
88	0.0205395	0.97946	1	0	2	[2, 0]	2
89	0.0205395	0.97946	1	0	2	[3, 1]	3.16228
90	0.0205395	0.97946	1	0	2	[2, 2]	2.82843
91	0.0205395	0.97946	1	0	2	[2, 3]	3.60555
92	0.0205395	0.97946	1	0	2	[3, 2]	3.60555
93	0.0205395	0.97946	1	0	2	[2, 2]	2.82843
94	0.0205395	0.97946	1	0	2	[3, 1]	3.16228
95	0.0205395	0.97946	1	0	2	[4, 0]	4
96	0.0205395	0.97946	1	0	2	[3, 0]	3
97	0.0205395	0.97946	1	0	2	[3, 0]	3
98	0.0205395	0.97946	1	0	2	[1, 0]	1
99	0.0205395	0.97946	1	0	2	[2, 0]	2
100	0.0205395	0.97946	1	0	2	[2, 0]	2
101	0.0205395	0.97946	1	0	2	[1, 0]	1
102	0.0205395	0.97946	1	0	2	[0, 0]	0
103	0.0205395	0.97946	1	1	3	[1, 0]	1
104	0.0205841	0.979416	1	0.996389	3	[1, 1]	1.41421
105	0.0222973	0.977703	1	0.857622	3	[2, 2]	2.82843
106	0.0228011	0.977199	1	0.816815	3	[3, 1]	3.16228
107	0.0251571	0.974843	1	0.625973	3	[2, 1]	2.23607
108	0.0274602	0.97254	1	0.439425	3	[1, 0]	1
109	0.0279689	0.972031	1	0.398221	3	[1, 0]	1
110	0.0287214	0.971279	1	0.337271	3	[3, 0]	3
111	0.0291854	0.970815	1	0.299688	3	[2, 0]	2
112	0.029638	0.970362	1	0.263021	3	[3, 0]	3
113	0.0328852	0.967115	1	0	3	[2, 1]	2.23607
114	0.0328852	0.967115	1	0	3	[2, 0]	2
115	0.0328852	0.967115	1	0	3	[2, 0]	2
116	0.0328852	0.967115	1	0	3	[3, 1]	3.16228
117	0.0328852	0.967115	1	0	3	[3, 0]	3
118	0.0328852	0.967115	1	0	3	[2, 1]	2.23607
119	0.0328852	0.967115	1	0	3	[2, 2]	2.82843
120	0.0328852	0.967115	1	0	3	[1, 2]	2.23607
121	0.0328852	0.967115	1	0	3	[1, 2]	2.23607
122	0.0328852	0.967115	1	0	3	[2, 3]	3.60555
123	0.0328852	0.967115	1	0	3	[3, 4]	5
124	0.0328852	0.967115	1	0	3	[4, 5]	6.40312
125	0.0328852	0.967115	1	0	3	[3, 4]	5
126	0.0328852	0.967115	1	0	3	[3, 4]	5
127	0.0328852	0.967115	1	0	3	[2, 4]	4.47214
128	0.0328852	0.967115	1	0	3	[2, 3]	3.60555
129	0.0328852	0.967115	1	0	3	[2, 2]	2.82843
130	0.0328852	0.967115	1	0	3	[1, 2]	2.23607
131	0.0328852	0.967115	1	0	3	[1, 3]	3.16228
132	0.0328852	0.967115	1	0	3	[1, 2]	2.23607
133	0.0328852	0.967115	1	0	3	[1, 1]	1.41421
134	0.0328852	0.967115	1	0	3	[0, 0]	0
135	0.0328852	0.967115	1	1	4	[1, 0]	1
136	0.0333718	0.966628	1	0.960586	4	[1, 1]	1.41421
137	0.0336654	0.966335	1	0.936807	4	[1, 3]	3.16228
138	0.0348311	0.965169	1	0.842387	4	[2, 2]	2.82843
139	0.0363868	0.963613	1	0.716375	4	[2, 1]	2.23607
140	0.0364879	0.963512	1	0.708185	4	[1, 0]	1
141	0.0381617	0.961838	1	0.572608	4	[1, 0]	1
142	0.0387221	0.961278	1	0.527212	4	[2, 1]	2.23607
143	0.0412163	0.958784	1	0.325179	4	[2, 2]	2.82843
144	0.0412606	0.958739	1	0.321596	4	[3, 1]	3.16228
145	0.0439933	0.956007	1	0.100245	4	[2, 0]	2
146	0.0452309	0.954769	1	0	4	[1, 0]	1
147	0.0452309	0.954769	1	0	4	[0, 0]	0
148	0.0452309	0.954769	1	1	5	[1, 0]	1
149	0.0481261	0.951874	1	0.765491	5	[1, 0]	1
150	0.0513237	0.948676	1	0.506481	5	[1, 0]	1
151	0.0519302	0.94807	1	0.457356	5	[2, 1]	2.23607
152	0.0526767	0.947323	1	0.396893	5	[3, 2]	3.60555
153	0.0536861	0.946314	1	0.315128	5	[3, 3]	4.24264
154	0.0550748	0.944925	1	0.202642	5	[2, 2]	2.82843
155	0.0575766	0.942423	1	0	5	[1, 1]	1.41421
156	0.0575766	0.942423	1	0	5	[1, 3]	3.16228
157	0.0575766	0.942423	1	0	5	[2, 3]	3.60555
158	0.0575766	0.942423	1	0	5	[1, 3]	3.16228
159	0.0575766	0.942423	1	0	5	[2, 2]	2.82843
160	0.0575766	0.942423	1	0	5	[1, 2]	2.23607
161	0.0575766	0.942423	1	0	5	[1, 1]	1.41421
162	0.0575766	0.942423	1	0	5	[1, 0]	1
163	0.0575766	0.942423	1	0	5	[1, 0]	1
164	0.0575766	0.942423	1	0	5	[0, 0]	0
165	0.0575766	0.942423	1	1	6	[1, 0]	1
166	0.0592661	0.940734	1	0.863145	6	[3, 0]	3
167	0.0647196	0.93528	1	0.421415	6	[4, 0]	4
168	0.0647537	0.935246	1	0.418652	6	[4, 0]	4
169	0.0677312	0.932269	1	0.177474	6	[5, 0]	5
170	0.0692586	0.930741	1	0.0537524	6	[5, 1]	5.09902
171	0.0699222	0.930078	1	0	6	[4, 1]	4.12311
172	0.0699222	0.930078	1	0	6	[3, 1]	3.16228
173	0.0699222	0.930078	1	0	6	[2, 0]	2
174	0.0699222	0.930078	1	0	6	[1, 0]	1
175	0.0699222	0.930078	1	0	6	[1, 0]	1
176	0.0699222	0.930078	1	0	6	[1, 0]	1
177	0.0699222	0.930078	1	0	6	[0, 0]	0
178	0.0699222	0.930078	1	1	7	[1, 0]	1
179	0.0719011	0.928099	1	0.839713	7	[2, 1]	2.23607
180	0.0734505	0.92655	1	0.714214	7	[3, 2]	3.60555
181	0.0769011	0.923099	1	0.434715	7	[2, 2]	2.82843
182	0.0795735	0.920426	1	0.218245	7	[2, 2]	2.82843
183	0.0811751	0.918825	1	0.0885175	7	[1, 3]	3.16228
184	0.0812055	0.918795	1	0.0860571	7	[1, 2]	2.23607
185	0.0822679	0.917732	1	0	7	[2, 2]	2.82843
186	0.0822679	0.917732	1	0	7	[1, 2]	2.23607
187	0.0822679	0.917732	1	0	7	[2, 1]	2.23607
188	0.0822679	0.917732	1	0	7	[1, 1]	1.41421
189	0.0822679	0.917732	1	0	7	[1, 1]	1.41421
190	0.0822679	0.917732	1	0	7	[0, 0]	0
191	0.0822679	0.917732	1	1	8	[1, 0]	1
192	0.0852996	0.9147	1	0.754435	8	[1, 1]	1.41421
193	0.0862158	0.913784	1	0.68022	8	[2, 2]	2.82843
194	0.0862399	0.91376	1	0.678268	8	[3, 3]	4.24264
195	0.0867493	0.913251	1	0.637009	8	[3, 2]	3.60555
196	0.0895706	0.910429	1	0.408486	8	[4, 3]	5
197	0.0898751	0.910125	1	0.383823	8	[4, 4]	5.65685
198	0.0903243	0.909676	1	0.347433	8	[3, 3]	4.24264
199	0.0907049	0.909295	1	0.316609	8	[3, 2]	3.60555
200	0.0907061	0.909294	1	0.31651	8	[4, 1]	4.12311
201	0.0909132	0.909087	1	0.299732	8	[3, 2]	3.60555
202	0.0910586	0.908941	1	0.287955	8	[3, 2]	3.60555
203	0.0912117	0.908788	1	0.275553	8	[4, 2]	4.47214
204	0.0924854	0.907515	1	0.172382	8	[4, 1]	4.12311
205	0.0926988	0.907301	1	0.1551	8	[3, 1]	3.16228
206	0.0941118	0.905888	1	0.0406447	8	[4, 1]	4.12311
207	0.0946136	0.905386	1	0	8	[3, 1]	3.16228
208	0.0946136	0.905386	1	0	8	[2, 2]	2.82843
209	0.0946136	0.905386	1	0	8	[2, 1]	2.23607
210	0.0946136	0.905386	1	0	8	[1, 1]	1.41421
211	0.0946136	0.905386	1	0	8	[1, 2]	2.23607
212	0.0946136	0.905386	1	0	8	[1, 1]	1.41421
213	0.0946136	0.905386	1	0	8	[1, 1]	1.41421
214	0.0946136	0.905386	1	0	8	[2, 1]	2.23607
215	0.0946136	0.905386	1	0	8	[2, 0]	2
216	0.0946136	0.905386	1	0	8	[3, 0]	3
217	0.0946136	0.905386	1	0	8	[1, 0]	1
218	0.0946136	0.905386	1	0	8	[2, 0]	2
219	0.0946136	0.905386	1	0	8	[1, 0]	1
220	0.0946136	0.905386	1	0	8	[1, 0]	1
221	0.0946136	0.905386	1	0	8	[2, 1]	2.23607
222	0.0946136	0.905386	1	0	8	[2, 1]	2.23607
223	0.0946136	0.905386	1	0	8	[1, 1]	1.41421
224	0.0946136	0.905386	1	0	8	[0, 0]	0
225	0.0946136	0.905386	1	1	9	[1, 0]	1
226	0.0974468	0.902553	1	0.770509	9	[2, 0]	2
227	0.0993259	0.900674	1	0.618304	9	[1, 0]	1
228	0.101635	0.898365	1	0.431241	9	[1, 1]	1.41421
229	0.105448	0.894552	1	0.122434	9	[1, 2]	2.23607
230	0.105497	0.894503	1	0.118484	9	[1, 3]	3.16228
231	0.105718	0.894282	1	0.100555	9	[1, 2]	2.23607
232	0.106431	0.893569	1	0.0428057	9	[1, 2]	2.23607
233	0.106959	0.893041	1	0	9	[1, 3]	3.16228
234	0.106959	0.893041	1	0	9	[1, 3]	3.16228
235	0.106959	0.893041	1	0	9	[1, 3]	3.16228
236	0.106959	0.893041	1	0	9	[2, 4]	4.47214
237	0.106959	0.893041	1	0	9	[1, 5]	5.09902
238	0.106959	0.893041	1	0	9	[2, 6]	6.32456
239	0.106959	0.893041	1	0	9	[3, 6]	6.7082
240	0.106959	0.893041	1	0	9	[3, 5]	5.83095
241	0.106959	0.893041	1	0	9	[3, 5]	5.83095
242	0.106959	0.893041	1	0	9	[3, 4]	5
243	0.106959	0.893041	1	0	9	[2, 5]	5.38516
244	0.106959	0.893041	1	0	9	[1, 4]	4.12311
245	0.106959	0.893041	1	0	9	[1, 3]	3.16228
246	0.106959	0.893041	1	0	9	[1, 2]	2.23607
247	0.106959	0.893041	1	0	9	[1, 3]	3.16228
248	0.106959	0.893041	1	0	9	[2, 3]	3.60555
249	0.106959	0.893041	1	0	9	[2, 2]	2.82843
250	0.106959	0.893041	1	0	9	[2, 1]	2.23607
251	0.106959	0.893041	1	0	9	[1, 0]	1
252	0.106959	0.893041	1	0	9	[0, 0]	0
253	0.106959	0.893041	1	1	10	[1, 0]	1
254	0.106967	0.893033	1	0.999353	10	[1, 0]	1
255	0.107218	0.892782	1	0.97901	10	[1, 0]	1
256	0.107465	0.892535	1	0.959006	10	[2, 1]	2.23607
257	0.107497	0.892503	1	0.956406	10	[1, 2]	2.23607
258	0.107497	0.892503	1	0.956406	10	[0, 0]	0
259	0.107497	0.892503	1	1	11	[1, 0]	1
260	0.107592	0.892408	1	0.992369	11	[1, 0]	1
261	0.109222	0.890778	1	0.860344	11	[1, 1]	1.41421
262	0.11265	0.88735	1	0.582629	11	[2, 0]	2
263	0.113507	0.886493	1	0.513201	11	[3, 1]	3.16228
264	0.11433	0.88567	1	0.446527	11	[2, 0]	2
265	0.114669	0.885331	1	0.419084	11	[1, 0]	1
266	0.114669	0.885331	1	0.419084	11	[0, 0]	0
267	0.114669	0.885331	1	1	12	[1, 0]	1
268	0.117644	0.882356	1	0.759061	12	[1, 1]	1.41421
269	0.119667	0.880333	1	0.595145	12	[2, 1]	2.23607
270	0.120059	0.879941	1	0.563398	12	[3, 0]	3
271	0.122202	0.877798	1	0.389853	12	[4, 0]	4
272	0.122246	0.877754	1	0.38628	12	[4, 0]	4
273	0.124083	0.875917	1	0.237479	12	[6, 0]	6
274	0.126631	0.873369	1	0.0310722	12	[5, 0]	5
275	0.127015	0.872985	1	0	12	[5, 0]	5
276	0.127015	0.872985	1	0	12	[5, 0]	5
277	0.127015	0.872985	1	0	12	[6, 0]	6
278	0.127015	0.872985	1	0	12	[7, 1]	7.07107
279	0.127015	0.872985	1	0	12	[8, 0]	8
280	0.127015	0.872985	1	0	12	[8, 0]	8
281	0.127015	0.872985	1	0	12	[7, 0]	7
282	0.127015	0.872985	1	0	12	[6, 0]	6
283	0.127015	0.872985	1	0	12	[6, 0]	6
284	0.127015	0.872985	1	0	12	[4, 0]	4
285	0.127015	0.872985	1	0	12	[3, 0]	3
286	0.127015	0.872985	1	0	12	[4, 0]	4
287	0.127015	0.872985	1	0	12	[4, 0]	4
288	0.127015	0.872985	1	0	12	[5, 0]	5
289	0.127015	0.872985	1	0	12	[4, 1]	4.12311
290	0.127015	0.872985	1	0	12	[3, 0]	3
291	0.127015	0.872985	1	0	12	[2, 0]	2
292	0.127015	0.872985	1	0	12	[1, 0]	1
293	0.127015	0.872985	1	0	12	[0, 0]	0
294	0.127015	0.872985	1	1	13	[1, 0]	1
295	0.127849	0.872151	1	0.932482	13	[2, 0]	2
296	0.128243	0.871757	1	0.900553	13	[3, 0]	3
297	0.12945	0.87055	1	0.802755	13	[3, 0]	3
298	0.132305	0.867695	1	0.571477	13	[4, 1]	4.12311
299	0.132763	0.867237	1	0.534421	13	[3, 0]	3
300	0.133523	0.866477	1	0.472885	13	[4, 0]	4
301	0.13421	0.86579	1	0.417219	13	[3, 1]	3.16228
302	0.134444	0.865556	1	0.398256	13	[3, 2]	3.60555
303	0.135899	0.864101	1	0.280402	13	[2, 2]	2.82843
304	0.137828	0.862172	1	0.124183	13	[2, 2]	2.82843
305	0.138505	0.861495	1	0.0692887	13	[2, 3]	3.60555
306	0.139361	0.860639	1	0	13	[3, 4]	5
307	0.139361	0.860639	1	0	13	[2, 4]	4.47214
308	0.139361	0.860639	1	0	13	[1, 4]	4.12311
309	0.139361	0.860639	1	0	13	[2, 3]	3.60555
310	0.139361	0.860639	1	0	13	[3, 4]	5
311	0.139361	0.860639	1	0	13	[2, 3]	3.60555
312	0.139361	0.860639	1	0	13	[1, 3]	3.16228
313	0.139361	0.860639	1	0	13	[1, 3]	3.16228
314	0.139361	0.860639	1	0	13	[1, 3]	3.16228
315	0.139361	0.860639	1	0	13	[1, 3]	3.16228
316	0.139361	0.860639	1	0	13	[1, 2]	2.23607
317	0.139361	0.860639	1	0	13	[2, 1]	2.23607
318	0.139361	0.860639	1	0	13	[1, 0]	1
319	0.139361	0.860639	1	0	13	[2, 0]	2
320	0.139361	0.860639	1	0	13	[2, 0]	2
321	0.139361	0.860639	1	0	13	[2, 0]	2
322	0.139361	0.860639	1	0	13	[3, 1]	3.16228
323	0.139361	0.860639	1	0	13	[2, 0]	2
324	0.139361	0.860639	1	0	13	[0, 0]	0
325	0.139361	0.860639	1	1	14	[1, 0]	1
326	0.14001	0.85999	1	0.947379	14	[1, 0]	1
327	0.150139	0.849861	1	0.126988	14	[1, 0]	1
328	0.150139	0.849861	1	0.126988	14	[0, 0]	0
329	0.150139	0.849861	1	1	15	[1, 0]	1
330	0.150139	0.849861	1	1	15	[0, 0]	0
331	0.150139	0.849861	1	1	16	[1, 0]	1
332	0.150139	0.849861	1	1	16	[0, 0]	0
333	0.150139	0.849861	1	1	17	[1, 0]	1
334	0.154493	0.845507	1	0.647276	17	[2, 1]	2.23607
335	0.154874	0.845126	1	0.616413	17	[3, 2]	3.60555
336	0.15676	0.84324	1	0.463641	17	[3, 3]	4.24264
337	0.157504	0.842496	1	0.403419	17	[4, 2]	4.47214
338	0.16047	0.83953	1	0.163152	17	[3, 3]	4.24264
339	0.161218	0.838782	1	0.102602	17	[2, 2]	2.82843
340	0.161328	0.838672	1	0.0936957	17	[1, 2]	2.23607
341	0.161879	0.838121	1	0.0490016	17	[1, 1]	1.41421
342	0.162484	0.837516	1	0	17	[1, 0]	1
343	0.162484	0.837516	1	0	17	[2, 0]	2
344	0.162484	0.837516	1	0	17	[2, 0]	2
345	0.162484	0.837516	1	0	17	[1, 1]	1.41421
346	0.162484	0.837516	1	0	17	[1, 1]	1.41421
347	0.162484	0.837516	1	0	17	[1, 0]	1
348	0.162484	0.837516	1	0	17	[1, 0]	1
349	0.162484	0.837516	1	0	17	[2, 0]	2
350	0.162484	0.837516	1	0	17	[1, 0]	1
351	0.162484	0.837516	1	0	17	[1, 0]	1
352	0.162484	0.837516	1	0	17	[0, 0]	0
353	0.162484	0.837516	1	1	18	[1, 0]	1
354	0.162484	0.837516	1	1	18	[0, 0]	0
355	0.162484	0.837516	1	1	19	[1, 0]	1
356	0.162558	0.837442	1	0.994005	19	[1, 0]	1
357	0.163582	0.836418	1	0.911093	19	[1, 1]	1.41421
358	0.163909	0.836091	1	0.88457	19	[2, 1]	2.23607
359	0.164136	0.835864	1	0.866182	19	[2, 1]	2.23607
360	0.164602	0.835398	1	0.828443	19	[1, 2]	2.23607
361	0.165565	0.834435	1	0.750457	19	[1, 1]	1.41421
362	0.165565	0.834435	1	0.750457	19	[0, 0]	0
363	0.165565	0.834435	1	1	20	[1, 0]	1
364	0.165788	0.834212	1	0.981918	20	[2, 0]	2
365	0.166845	0.833155	1	0.896348	20	[1, 0]	1
366	0.166845	0.833155	1	0.896348	20	[0, 0]	0
367	0.166845	0.833155	1	1	21	[1, 0]	1
368	0.166949	0.833051	1	0.991588	21	[1, 1]	1.41421
369	0.167937	0.832063	1	0.911498	21	[1, 0]	1
370	0.167937	0.832063	1	0.911498	21	[0, 0]	0
371	0.167937	0.832063	1	1	22	[1, 0]	1
372	0.170494	0.829506	1	0.79289	22	[1, 1]	1.41421
373	0.170494	0.829506	1	0.79289	22	[0, 0]	0
374	0.170494	0.829506	1	1	23	[1, 0]	1
375	0.171219	0.828781	1	0.941327	23	[2, 1]	2.23607
376	0.171509	0.828491	1	0.917836	23	[1, 2]	2.23607
377	0.173384	0.826616	1	0.765917	23	[2, 3]	3.60555
378	0.173887	0.826113	1	0.725148	23	[3, 4]	5
379	0.176467	0.823533	1	0.516204	23	[2, 3]	3.60555
380	0.176595	0.823405	1	0.505814	23	[2, 3]	3.60555
381	0.180316	0.819684	1	0.204475	23	[1, 2]	2.23607
382	0.181084	0.818916	1	0.142263	23	[2, 1]	2.23607
383	0.18151	0.81849	1	0.107714	23	[2, 1]	2.23607
384	0.18284	0.81716	1	0	23	[2, 0]	2
385	0.18284	0.81716	1	0	23	[2, 0]	2
386	0.18284	0.81716	1	0	23	[2, 0]	2
387	0.18284	0.81716	1	0	23	[2, 0]	2
388	0.18284	0.81716	1	0	23	[1, 0]	1
389	0.18284	0.81716	1	0	23	[1, 1]	1.41421
390	0.18284	0.81716	1	0	23	[1, 2]	2.23607
391	0.18284	0.81716	1	0	23	[1, 1]	1.41421
392	0.18284	0.81716	1	0	23	[1, 0]	1
393	0.18284	0.81716	1	0	23	[2, 0]	2
394	0.18284	0.81716	1	0	23	[2, 0]	2
395	0.18284	0.81716	1	0	23	[2, 0]	2
396	0.18284	0.81716	1	0	23	[0, 0]	0
397	0.18284	0.81716	1	1	24	[1, 0]	1
398	0.184888	0.815112	1	0.834099	24	[1, 1]	1.41421
399	0.187762	0.812238	1	0.601319	24	[1, 1]	1.41421
400	0.188285	0.811715	1	0.558917	24	[1, 0]	1
401	0.19047	0.80953	1	0.381926	24	[2, 0]	2
402	0.190721	0.809279	1	0.361643	24	[2, 0]	2
403	0.191109	0.808891	1	0.330172	24	[1, 1]	1.41421
404	0.191183	0.808817	1	0.324191	24	[1, 2]	2.23607
405	0.191604	0.808396	1	0.290109	24	[1, 1]	1.41421
406	0.193335	0.806665	1	0.149873	24	[1, 3]	3.16228
407	0.194129	0.805871	1	0.0856054	24	[1, 4]	4.12311
408	0.194981	0.805019	1	0.0165964	24	[1, 3]	3.16228
409	0.195073	0.804927	1	0.00907872	24	[1, 2]	2.23607
410	0.195186	0.804814	1	0	24	[1, 1]	1.41421
411	0.195186	0.804814	1	0	24	[2, 0]	2
412	0.195186	0.804814	1	0	24	[2, 1]	2.23607
413	0.195186	0.804814	1	0	24	[2, 0]	2
414	0.195186	0.804814	1	0	24	[2, 0]	2
415	0.195186	0.804814	1	0	24	[3, 0]	3
416	0.195186	0.804814	1	0	24	[4, 0]	4
417	0.195186	0.804814	1	0	24	[3, 1]	3.16228
418	0.195186	0.804814	1	0	24	[2, 0]	2
419	0.195186	0.804814	1	0	24	[0, 0]	0
420	0.195186	0.804814	1	1	25	[1, 0]	1
421	0.1952	0.8048	1	0.998831	25	[1, 0]	1
422	0.199229	0.800771	1	0.672476	25	[2, 0]	2
423	0.199388	0.800612	1	0.659584	25	[1, 0]	1
424	0.199906	0.800094	1	0.617607	25	[1, 0]	1
425	0.200247	0.799753	1	0.590003	25	[2, 0]	2
426	0.200641	0.799359	1	0.558097	25	[2, 0]	2
427	0.202129	0.797871	1	0.437595	25	[1, 1]	1.41421
428	0.202165	0.797835	1	0.434677	25	[1, 0]	1
429	0.202165	0.797835	1	0.434677	25	[0, 0]	0
430	0.202165	0.797835	1	1	26	[1, 0]	1
431	0.202557	0.797443	1	0.968213	26	[1, 1]	1.41421
432	0.203341	0.796659	1	0.904714	26	[1, 2]	2.23607
433	0.203683	0.796317	1	0.877061	26	[1, 3]	3.16228
434	0.207395	0.792605	1	0.576379	26	[2, 3]	3.60555
435	0.208068	0.791932	1	0.521858	26	[3, 3]	4.24264
436	0.209012	0.790988	1	0.445356	26	[3, 4]	5
437	0.210545	0.789455	1	0.321235	26	[2, 5]	5.38516
438	0.211234	0.788766	1	0.265367	26	[3, 4]	5
439	0.212141	0.787859	1	0.191934	26	[3, 3]	4.24264
440	0.212462	0.787538	1	0.165954	26	[2, 2]	2.82843
441	0.212765	0.787235	1	0.141379	26	[1, 1]	1.41421
442	0.214511	0.785489	1	0	26	[1, 1]	1.41421
443	0.214511	0.785489	1	0	26	[1, 1]	1.41421
444	0.214511	0.785489	1	0	26	[0, 0]	0
445	0.214511	0.785489	1	1	27	[1, 0]	1
446	0.215008	0.784992	1	0.959693	27	[1, 0]	1
447	0.216051	0.783949	1	0.875232	27	[1, 1]	1.41421
448	0.216051	0.783949	1	0.875232	27	[0, 0]	0
449	0.216051	0.783949	1	1	28	[1, 0]	1
450	0.21631	0.78369	1	0.978983	28	[3, 0]	3
451	0.216767	0.783233	1	0.941955	28	[3, 0]	3
452	0.218576	0.781424	1	0.795447	28	[4, 0]	4
453	0.21901	0.78099	1	0.760335	28	[3, 0]	3
454	0.221388	0.778612	1	0.567697	28	[4, 1]	4.12311
455	0.222367	0.777633	1	0.488384	28	[4, 2]	4.47214
456	0.228397	0.771603	1	0	28	[5, 3]	5.83095
457	0.228397	0.771603	1	0	28	[6, 3]	6.7082
458	0.228397	0.771603	1	0	28	[6, 2]	6.32456
459	0.228397	0.771603	1	0	28	[5, 1]	5.09902
460	0.228397	0.771603	1	0	28	[5, 1]	5.09902
461	0.228397	0.771603	1	0	28	[5, 0]	5
462	0.228397	0.771603	1	0	28	[6, 0]	6
463	0.228397	0.771603	1	0	28	[8, 0]	8
464	0.228397	0.771603	1	0	28	[7, 0]	7
465	0.228397	0.771603	1	0	28	[6, 0]	6
466	0.228397	0.771603	1	0	28	[5, 0]	5
467	0.228397	0.771603	1	0	28	[5, 1]	5.09902
468	0.228397	0.771603	1	0	28	[6, 1]	6.08276
469	0.228397	0.771603	1	0	28	[5, 0]	5
470	0.228397	0.771603	1	0	28	[6, 0]	6
471	0.228397	0.771603	1	0	28	[5, 0]	5
472	0.228397	0.771603	1	0	28	[4, 0]	4
473	0.228397	0.771603	1	0	28	[4, 0]	4
474	0.228397	0.771603	1	0	28	[3, 1]	3.16228
475	0.228397	0.771603	1	0	28	[3, 2]	3.60555
476	0.228397	0.771603	1	0	28	[3, 1]	3.16228
477	0.228397	0.771603	1	0	28	[2, 0]	2
478	0.228397	0.771603	1	0	28	[2, 0]	2
479	0.228397	0.771603	1	0	28	[3, 0]	3
480	0.228397	0.771603	1	0	28	[2, 0]	2
481	0.228397	0.771603	1	0	28	[3, 0]	3
482	0.228397	0.771603	1	0	28	[3, 1]	3.16228
483	0.228397	0.771603	1	0	28	[3, 0]	3
484	0.228397	0.771603	1	0	28	[3, 0]	3
485	0.228397	0.771603	1	0	28	[3, 0]	3
486	0.228397	0.771603	1	0	28	[2, 0]	2
487	0.228397	0.771603	1	0	28	[3, 0]	3
488	0.228397	0.771603	1	0	28	[2, 1]	2.23607
489	0.228397	0.771603	1	0	28	[1, 0]	1
490	0.228397	0.771603	1	0	28	[1, 1]	1.41421
491	0.228397	0.771603	1	0	28	[1, 2]	2.23607
492	0.228397	0.771603	1	0	28	[1, 2]	2.23607
493	0.228397	0.771603	1	0	28	[1, 1]	1.41421
494	0.228397	0.771603	1	0	28	[2, 2]	2.82843
495	0.228397	0.771603	1	0	28	[2, 3]	3.60555
496	0.228397	0.771603	1	0	28	[1, 2]	2.23607
497	0.228397	0.771603	1	0	28	[2, 3]	3.60555
498	0.228397	0.771603	1	0	28	[1, 4]	4.12311
499	0.228397	0.771603	1	0	28	[1, 4]	4.12311
500	0.228397	0.771603	1	0	28	[1, 3]	3.16228
501	0.228397	0.771603	1	0	28	[2, 2]	2.82843
502	0.228397	0.771603	1	0	28	[1, 2]	2.23607
503	0.228397	0.771603	1	0	28	[1, 1]	1.41421
504	0.228397	0.771603	1	0	28	[1, 1]	1.41421
505	0.228397	0.771603	1	0	28	[0, 0]	0
506	0.228397	0.771603	1	1	29	[1, 0]	1
507	0.233175	0.766825	1	0.612934	29	[1, 1]	1.41421
508	0.235799	0.764201	1	0.400435	29	[2, 0]	2
509	0.237089	0.762911	1	0.29595	29	[1, 0]	1
510	0.240016	0.759984	1	0.058859	29	[1, 0]	1
511	0.240738	0.759262	1	0.000308782	29	[1, 0]	1
512	0.240742	0.759258	1	0	29	[1, 0]	1
513	0.240742	0.759258	1	0	29	[1, 2]	2.23607
514	0.240742	0.759258	1	0	29	[1, 2]	2.23607
515	0.240742	0.759258	1	0	29	[0, 0]	0
516	0.240742	0.759258	1	1	30	[1, 0]	1
517	0.242164	0.757836	1	0.884838	30	[2, 0]	2
518	0.243038	0.756962	1	0.814026	30	[2, 0]	2
519	0.243775	0.756225	1	0.754323	30	[1, 0]	1
520	0.243775	0.756225	1	0.754323	30	[0, 0]	0
521	0.243775	0.756225	1	1	31	[1, 0]	1
522	0.243902	0.756098	1	0.989743	31	[1, 0]	1
523	0.246617	0.753383	1	0.769786	31	[2, 0]	2
524	0.247009	0.752991	1	0.738081	31	[2, 0]	2
525	0.252835	0.747165	1	0.266198	31	[3, 0]	3
526	0.253915	0.746085	1	0.178703	31	[4, 0]	4
527	0.256121	0.743879	1	0	31	[3, 0]	3
528	0.256121	0.743879	1	0	31	[3, 1]	3.16228
529	0.256121	0.743879	1	0	31	[4, 0]	4
530	0.256121	0.743879	1	0	31	[3, 0]	3
531	0.256121	0.743879	1	0	31	[2, 1]	2.23607
532	0.256121	0.743879	1	0	31	[1, 1]	1.41421
533	0.256121	0.743879	1	0	31	[0, 0]	0
534	0.256121	0.743879	1	1	32	[1, 0]	1
535	0.257498	0.742502	1	0.888436	32	[1, 1]	1.41421
536	0.25794	0.74206	1	0.852665	32	[2, 1]	2.23607
537	0.258273	0.741727	1	0.825685	32	[2, 0]	2
538	0.258637	0.741363	1	0.796178	32	[1, 1]	1.41421
539	0.259637	0.740363	1	0.715239	32	[2, 1]	2.23607
540	0.260132	0.739868	1	0.675079	32	[2, 0]	2
541	0.260507	0.739493	1	0.644707	32	[3, 0]	3
542	0.260767	0.739233	1	0.623664	32	[4, 0]	4
543	0.261278	0.738722	1	0.582271	32	[3, 0]	3
544	0.262266	0.737734	1	0.502254	32	[4, 0]	4
545	0.265295	0.734705	1	0.256944	32	[4, 1]	4.12311
546	0.265881	0.734119	1	0.209439	32	[3, 0]	3
547	0.266089	0.733911	1	0.192608	32	[3, 0]	3
548	0.266357	0.733643	1	0.170904	32	[2, 0]	2
549	0.267207	0.732793	1	0.102003	32	[1, 0]	1
550	0.268467	0.731533	1	0	32	[1, 1]	1.41421
551	0.268467	0.731533	1	0	32	[0, 0]	0
552	0.268467	0.731533	1	1	33	[1, 0]	1
553	0.268939	0.731061	1	0.961738	33	[2, 0]	2
554	0.269358	0.730642	1	0.927829	33	[3, 0]	3
555	0.269773	0.730227	1	0.894167	33	[3, 1]	3.16228
556	0.270446	0.729554	1	0.839663	33	[2, 1]	2.23607
557	0.271757	0.728243	1	0.733473	33	[1, 1]	1.41421
558	0.272322	0.727678	1	0.687717	33	[1, 2]	2.23607
559	0.273312	0.726688	1	0.607488	33	[2, 2]	2.82843
560	0.274517	0.725483	1	0.50989	33	[1, 2]	2.23607
561	0.274752	0.725248	1	0.490907	33	[2, 1]	2.23607
562	0.27559	0.72441	1	0.423	33	[3, 2]	3.60555
563	0.277468	0.722532	1	0.270924	33	[4, 1]	4.12311
564	0.278314	0.721686	1	0.202404	33	[3, 1]	3.16228
565	0.27907	0.72093	1	0.141096	33	[4, 0]	4
566	0.280609	0.719391	1	0.0164398	33	[3, 0]	3
567	0.280748	0.719252	1	0.00517424	33	[4, 0]	4
568	0.280764	0.719236	1	0.00391053	33	[5, 0]	5
569	0.280812	0.719188	1	0	33	[4, 1]	4.12311
570	0.280812	0.719188	1	0	33	[3, 0]	3
571	0.280812	0.719188	1	0	33	[2, 0]	2
572	0.280812	0.719188	1	0	33	[1, 0]	1
573	0.280812	0.719188	1	0	33	[2, 1]	2.23607
574	0.280812	0.719188	1	0	33	[1, 1]	1.41421
575	0.280812	0.719188	1	0	33	[0, 0]	0
576	0.280812	0.719188	1	1	34	[1, 0]	1
577	0.282949	0.717051	1	0.826912	34	[2, 0]	2
578	0.282949	0.717051	1	0.826912	34	[0, 0]	0
579	0.282949	0.717051	1	1	35	[1, 0]	1
580	0.282949	0.717051	1	1	35	[0, 0]	0
581	0.282949	0.717051	1	1	36	[1, 0]	1
582	0.286095	0.713905	1	0.74522	36	[2, 1]	2.23607
583	0.286552	0.713448	1	0.70818	36	[2, 2]	2.82843
584	0.287323	0.712677	1	0.645705	36	[1, 2]	2.23607
585	0.291754	0.708246	1	0.28678	36	[1, 1]	1.41421
586	0.29225	0.70775	1	0.246664	36	[1, 2]	2.23607
587	0.293218	0.706782	1	0.168209	36	[1, 2]	2.23607
588	0.293715	0.706285	1	0.127946	36	[1, 1]	1.41421
589	0.294359	0.705641	1	0.0758149	36	[1, 2]	2.23607
590	0.295295	0.704705	1	0	36	[2, 1]	2.23607
591	0.295295	0.704705	1	0	36	[1, 0]	1
592	0.295295	0.704705	1	0	36	[0, 0]	0
593	0.295295	0.704705	1	1	37	[1, 0]	1
594	0.295718	0.704282	1	0.965746	37	[1, 0]	1
595	0.296237	0.703763	1	0.923721	37	[2, 0]	2
596	0.30001	0.69999	1	0.618058	37	[3, 1]	3.16228
597	0.30062	0.69938	1	0.568703	37	[3, 2]	3.60555
598	0.300723	0.699277	1	0.560286	37	[2, 1]	2.23607
599	0.30124	0.69876	1	0.518474	37	[3, 1]	3.16228
600	0.301501	0.698499	1	0.497275	37	[2, 1]	2.23607
601	0.302582	0.697418	1	0.409769	37	[1, 1]	1.41421
602	0.302582	0.697418	1	0.409769	37	[0, 0]	0
603	0.302582	0.697418	1	1	38	[1, 0]	1
604	0.305089	0.694911	1	0.796903	38	[1, 1]	1.41421
605	0.305619	0.694381	1	0.75396	38	[2, 2]	2.82843
606	0.305726	0.694274	1	0.745347	38	[2, 1]	2.23607
607	0.306629	0.693371	1	0.672179	38	[3, 0]	3
608	0.307732	0.692268	1	0.582821	38	[3, 0]	3
609	0.307781	0.692219	1	0.578821	38	[4, 0]	4
610	0.307789	0.692211	1	0.578246	38	[3, 0]	3
611	0.30859	0.69141	1	0.513309	38	[4, 1]	4.12311
612	0.309518	0.690482	1	0.438193	38	[5, 1]	5.09902
613	0.312278	0.687722	1	0.214603	38	[5, 0]	5
614	0.313192	0.686808	1	0.140559	38	[6, 0]	6
615	0.313822	0.686178	1	0.0895305	38	[5, 0]	5
616	0.314397	0.685603	1	0.042948	38	[6, 0]	6
617	0.314927	0.685073	1	0	38	[6, 1]	6.08276
618	0.314927	0.685073	1	0	38	[5, 2]	5.38516
619	0.314927	0.685073	1	0	38	[4, 3]	5
620	0.314927	0.685073	1	0	38	[3, 2]	3.60555
621	0.314927	0.685073	1	0	38	[4, 1]	4.12311
622	0.314927	0.685073	1	0	38	[4, 2]	4.47214
623	0.314927	0.685073	1	0	38	[4, 1]	4.12311
624	0.314927	0.685073	1	0	38	[4, 2]	4.47214
625	0.314927	0.685073	1	0	38	[3, 3]	4.24264
626	0.314927	0.685073	1	0	38	[3, 2]	3.60555
627	0.314927	0.685073	1	0	38	[2, 1]	2.23607
628	0.314927	0.685073	1	0	38	[2, 0]	2
629	0.314927	0.685073	1	0	38	[2, 0]	2
630	0.314927	0.685073	1	0	38	[1, 0]	1
631	0.314927	0.685073	1	0	38	[1, 0]	1
632	0.314927	0.685073	1	0	38	[2, 1]	2.23607
633	0.314927	0.685073	1	0	38	[3, 0]	3
634	0.314927	0.685073	1	0	38	[3, 0]	3
635	0.314927	0.685073	1	0	38	[3, 0]	3
636	0.314927	0.685073	1	0	38	[3, 0]	3
637	0.314927	0.685073	1	0	38	[3, 0]	3
638	0.314927	0.685073	1	0	38	[5, 0]	5
639	0.314927	0.685073	1	0	38	[4, 0]	4
640	0.314927	0.685073	1	0	38	[4, 0]	4
641	0.314927	0.685073	1	0	38	[3, 0]	3
642	0.314927	0.685073	1	0	38	[2, 0]	2
643	0.314927	0.685073	1	0	38	[1, 0]	1
644	0.314927	0.685073	1	0	38	[2, 0]	2
645	0.314927	0.685073	1	0	38	[1, 0]	1
646	0.314927	0.685073	1	0	38	[1, 0]	1
647	0.314927	0.685073	1	0	38	[0, 0]	0
648	0.314927	0.685073	1	1	39	[1, 0]	1
649	0.315204	0.684796	1	0.977566	39	[2, 0]	2
650	0.317324	0.682676	1	0.805854	39	[3, 0]	3
651	0.31735	0.68265	1	0.803733	39	[2, 1]	2.23607
652	0.317418	0.682582	1	0.798254	39	[3, 0]	3
653	0.319284	0.680716	1	0.647152	39	[4, 0]	4
654	0.320668	0.679332	1	0.535029	39	[4, 0]	4
655	0.322574	0.677426	1	0.380593	39	[4, 0]	4
656	0.324699	0.675301	1	0.208536	39	[3, 0]	3
657	0.3249	0.6751	1	0.192222	39	[3, 1]	3.16228
658	0.324903	0.675097	1	0.191944	39	[3, 2]	3.60555
659	0.325155	0.674845	1	0.171587	39	[4, 2]	4.47214
660	0.325391	0.674609	1	0.152416	39	[3, 1]	3.16228
661	0.325849	0.674151	1	0.115347	39	[2, 2]	2.82843
662	0.326478	0.673522	1	0.064432	39	[1, 1]	1.41421
663	0.327273	0.672727	1	0	39	[1, 2]	2.23607
664	0.327273	0.672727	1	0	39	[0, 0]	0
665	0.327273	0.672727	1	1	40	[1, 0]	1
666	0.327885	0.672115	1	0.950409	40	[2, 1]	2.23607
667	0.328745	0.671255	1	0.880794	40	[3, 1]	3.16228
668	0.328973	0.671027	1	0.862343	40	[4, 1]	4.12311
669	0.329056	0.670944	1	0.855572	40	[5, 1]	5.09902
670	0.329569	0.670431	1	0.814069	40	[5, 2]	5.38516
671	0.330399	0.669601	1	0.746819	40	[4, 2]	4.47214
672	0.330734	0.669266	1	0.719702	40	[3, 3]	4.24264
673	0.33077	0.66923	1	0.716761	40	[4, 3]	5
674	0.330902	0.669098	1	0.706044	40	[3, 3]	4.24264
675	0.332385	0.667615	1	0.58595	40	[3, 2]	3.60555
676	0.332674	0.667326	1	0.562518	40	[2, 2]	2.82843
677	0.335676	0.664324	1	0.319393	40	[2, 2]	2.82843
678	0.336265	0.663735	1	0.271683	40	[2, 1]	2.23607
679	0.336743	0.663257	1	0.232962	40	[1, 0]	1
680	0.33698	0.66302	1	0.2137	40	[1, 0]	1
681	0.338182	0.661818	1	0.116364	40	[2, 0]	2
682	0.339619	0.660381	1	0	40	[1, 0]	1
683	0.339619	0.660381	1	0	40	[2, 0]	2
684	0.339619	0.660381	1	0	40	[1, 0]	1
685	0.339619	0.660381	1	0	40	[0, 0]	0
686	0.339619	0.660381	1	1	41	[1, 0]	1
687	0.339879	0.660121	1	0.978909	41	[2, 1]	2.23607
688	0.340312	0.659688	1	0.943857	41	[1, 0]	1
689	0.342174	0.657826	1	0.793058	41	[2, 1]	2.23607
690	0.342196	0.657804	1	0.791232	41	[1, 0]	1
691	0.342779	0.657221	1	0.743998	41	[2, 1]	2.23607
692	0.346515	0.653485	1	0.441433	41	[2, 2]	2.82843
693	0.347327	0.652673	1	0.375597	41	[2, 2]	2.82843
694	0.347909	0.652091	1	0.328505	41	[1, 2]	2.23607
695	0.348248	0.651752	1	0.301026	41	[2, 3]	3.60555
696	0.348425	0.651575	1	0.286676	41	[1, 4]	4.12311
697	0.348688	0.651312	1	0.265351	41	[1, 3]	3.16228
698	0.35138	0.64862	1	0.0473242	41	[1, 1]	1.41421
699	0.351519	0.648481	1	0.0361061	41	[1, 1]	1.41421
700	0.351519	0.648481	1	0.0361061	41	[0, 0]	0
701	0.351519	0.648481	1	1	42	[1, 0]	1
702	0.351519	0.648481	1	1	42	[0, 0]	0
703	0.351519	0.648481	1	1	43	[1, 0]	1
704	0.351695	0.648305	1	0.985691	43	[2, 1]	2.23607
705	0.352576	0.647424	1	0.914391	43	[1, 2]	2.23607
706	0.353717	0.646283	1	0.821897	43	[1, 2]	2.23607
707	0.353841	0.646159	1	0.811881	43	[1, 3]	3.16228
708	0.353842	0.646158	1	0.81178	43	[1, 3]	3.16228
709	0.354363	0.645637	1	0.769605	43	[2, 4]	4.47214
710	0.355021	0.644979	1	0.716342	43	[1, 4]	4.12311
711	0.356888	0.643112	1	0.565109	43	[1, 5]	5.09902
712	0.358354	0.641646	1	0.446337	43	[2, 5]	5.38516
713	0.358767	0.641233	1	0.412851	43	[2, 5]	5.38516
714	0.359291	0.640709	1	0.370412	43	[2, 4]	4.47214
715	0.360262	0.639738	1	0.291777	43	[1, 5]	5.09902
716	0.362941	0.637059	1	0.074784	43	[2, 5]	5.38516
717	0.36332	0.63668	1	0.0441136	43	[1, 5]	5.09902
718	0.363864	0.636136	1	0	43	[1, 7]	7.07107
719	0.363864	0.636136	1	0	43	[1, 7]	7.07107
720	0.363864	0.636136	1	0	43	[1, 7]	7.07107
721	0.363864	0.636136	1	0	43	[1, 7]	7.07107
722	0.363864	0.636136	1	0	43	[1, 8]	8.06226
723	0.363864	0.636136	1	0	43	[1, 8]	8.06226
724	0.363864	0.636136	1	0	43	[1, 7]	7.07107
725	0.363864	0.636136	1	0	43	[1, 7]	7.07107
726	0.363864	0.636136	1	0	43	[2, 8]	8.24621
727	0.363864	0.636136	1	0	43	[1, 7]	7.07107
728	0.363864	0.636136	1	0	43	[1, 6]	6.08276
729	0.363864	0.636136	1	0	43	[1, 5]	5.09902
730	0.363864	0.636136	1	0	43	[1, 4]	4.12311
731	0.363864	0.636136	1	0	43	[1, 2]	2.23607
732	0.363864	0.636136	1	0	43	[1, 1]	1.41421
733	0.363864	0.636136	1	0	43	[1, 1]	1.41421
734	0.363864	0.636136	1	0	43	[1, 1]	1.41421
735	0.363864	0.636136	1	0	43	[1, 1]	1.41421
736	0.363864	0.636136	1	0	43	[2, 1]	2.23607
737	0.363864	0.636136	1	0	43	[1, 1]	1.41421
738	0.363864	0.636136	1	0	43	[2, 0]	2
739	0.363864	0.636136	1	0	43	[1, 0]	1
740	0.363864	0.636136	1	0	43	[1, 0]	1
741	0.363864	0.636136	1	0	43	[0, 0]	0
742	0.363864	0.636136	1	1	44	[1, 0]	1
743	0.363864	0.636136	1	1	44	[0, 0]	0
744	0.363864	0.636136	1	1	45	[1, 0]	1
745	0.37032	0.62968	1	0.477122	45	[2, 0]	2
746	0.371308	0.628692	1	0.397063	45	[2, 1]	2.23607
747	0.371376	0.628624	1	0.391534	45	[3, 0]	3
748	0.372114	0.627886	1	0.331804	45	[3, 0]	3
749	0.372255	0.627745	1	0.320329	45	[4, 0]	4
750	0.372736	0.627264	1	0.281373	45	[3, 1]	3.16228
751	0.372829	0.627171	1	0.273839	45	[4, 0]	4
752	0.372946	0.627054	1	0.264368	45	[4, 0]	4
753	0.373834	0.626166	1	0.192471	45	[3, 0]	3
754	0.373908	0.626092	1	0.186433	45	[1, 0]	1
755	0.374228	0.625772	1	0.160522	45	[1, 0]	1
756	0.374304	0.625696	1	0.154408	45	[1, 0]	1
757	0.374304	0.625696	1	0.154408	45	[0, 0]	0
758	0.374304	0.625696	1	1	46	[1, 0]	1
759	0.376396	0.623604	1	0.830543	46	[2, 0]	2
760	0.37705	0.62295	1	0.777565	46	[1, 0]	1
761	0.378717	0.621283	1	0.642504	46	[3, 0]	3
762	0.380074	0.619926	1	0.532572	46	[3, 1]	3.16228
763	0.38052	0.61948	1	0.496465	46	[2, 0]	2
764	0.381245	0.618755	1	0.437768	46	[3, 1]	3.16228
765	0.381886	0.618114	1	0.385832	46	[3, 2]	3.60555
766	0.382425	0.617575	1	0.342159	46	[2, 3]	3.60555
767	0.386573	0.613427	1	0.00620484	46	[2, 3]	3.60555
768	0.386649	0.613351	1	0	46	[1, 4]	4.12311
769	0.386649	0.613351	1	0	46	[1, 3]	3.16228
770	0.386649	0.613351	1	0	46	[1, 2]	2.23607
771	0.386649	0.613351	1	0	46	[1, 3]	3.16228
772	0.386649	0.613351	1	0	46	[1, 5]	5.09902
773	0.386649	0.613351	1	0	46	[2, 5]	5.38516
774	0.386649	0.613351	1	0	46	[1, 5]	5.09902
775	0.386649	0.613351	1	0	46	[2, 6]	6.32456
776	0.386649	0.613351	1	0	46	[2, 5]	5.38516
777	0.386649	0.613351	1	0	46	[2, 4]	4.47214
778	0.386649	0.613351	1	0	46	[1, 4]	4.12311
779	0.386649	0.613351	1	0	46	[2, 3]	3.60555
780	0.386649	0.613351	1	0	46	[3, 2]	3.60555
781	0.386649	0.613351	1	0	46	[2, 2]	2.82843
782	0.386649	0.613351	1	0	46	[3, 3]	4.24264
783	0.386649	0.613351	1	0	46	[3, 2]	3.60555
784	0.386649	0.613351	1	0	46	[3, 3]	4.24264
785	0.386649	0.613351	1	0	46	[3, 3]	4.24264
786	0.386649	0.613351	1	0	46	[4, 2]	4.47214
787	0.386649	0.613351	1	0	46	[4, 2]	4.47214
788	0.386649	0.613351	1	0	46	[4, 1]	4.12311
789	0.386649	0.613351	1	0	46	[4, 1]	4.12311
790	0.386649	0.613351	1	0	46	[4, 0]	4
791	0.386649	0.613351	1	0	46	[2, 0]	2
792	0.386649	0.613351	1	0	46	[1, 0]	1
793	0.386649	0.613351	1	0	46	[0, 0]	0
794	0.386649	0.613351	1	1	47	[1, 0]	1
795	0.386917	0.613083	1	0.978348	47	[2, 0]	2
796	0.387445	0.612555	1	0.935598	47	[1, 1]	1.41421
797	0.387445	0.612555	1	0.935598	47	[0, 0]	0
798	0.387445	0.612555	1	1	48	[1, 0]	1
799	0.387638	0.612362	1	0.984349	48	[2, 0]	2
800	0.387861	0.612139	1	0.966227	48	[1, 0]	1
801	0.388513	0.611487	1	0.913472	48	[1, 0]	1
802	0.388592	0.611408	1	0.907037	48	[1, 0]	1
803	0.388943	0.611057	1	0.878649	48	[2, 0]	2
804	0.390605	0.609395	1	0.744007	48	[3, 0]	3
805	0.39073	0.60927	1	0.733842	48	[3, 0]	3
806	0.391187	0.608813	1	0.696846	48	[1, 0]	1
807	0.391321	0.608679	1	0.686013	48	[1, 0]	1
808	0.391337	0.608663	1	0.684718	48	[1, 1]	1.41421
809	0.391353	0.608647	1	0.683427	48	[1, 0]	1
810	0.391684	0.608316	1	0.656573	48	[1, 0]	1
811	0.391724	0.608276	1	0.653375	48	[2, 0]	2
812	0.392642	0.607358	1	0.579018	48	[3, 0]	3
813	0.393344	0.606656	1	0.52213	48	[3, 1]	3.16228
814	0.393874	0.606126	1	0.479239	48	[4, 0]	4
815	0.398453	0.601547	1	0.108299	48	[4, 0]	4
816	0.398566	0.601434	1	0.0991784	48	[3, 0]	3
817	0.398719	0.601281	1	0.0867336	48	[3, 0]	3
818	0.399747	0.600253	1	0.00352458	48	[1, 0]	1
819	0.39979	0.60021	1	0	48	[1, 1]	1.41421
820	0.39979	0.60021	1	0	48	[2, 0]	2
821	0.39979	0.60021	1	0	48	[3, 0]	3
822	0.39979	0.60021	1	0	48	[3, 1]	3.16228
823	0.39979	0.60021	1	0	48	[3, 0]	3
824	0.39979	0.60021	1	0	48	[3, 0]	3
825	0.39979	0.60021	1	0	48	[2, 0]	2
826	0.39979	0.60021	1	0	48	[1, 0]	1
827	0.39979	0.60021	1	0	48	[0, 0]	0
828	0.39979	0.60021	1	1	49	[1, 0]	1
829	0.399855	0.600145	1	0.994785	49	[1, 0]	1
830	0.399963	0.600037	1	0.98601	49	[2, 1]	2.23607
831	0.40004	0.59996	1	0.979789	49	[2, 2]	2.82843
832	0.400765	0.599235	1	0.921004	49	[1, 2]	2.23607
833	0.404853	0.595147	1	0.589894	49	[2, 3]	3.60555
834	0.405204	0.594796	1	0.561459	49	[3, 3]	4.24264
835	0.405595	0.594405	1	0.529796	49	[4, 2]	4.47214
836	0.406764	0.593236	1	0.435087	49	[5, 2]	5.38516
837	0.40732	0.59268	1	0.390084	49	[4, 1]	4.12311
838	0.407775	0.592225	1	0.353207	49	[3, 0]	3
839	0.409753	0.590247	1	0.192997	49	[2, 1]	2.23607
840	0.409822	0.590178	1	0.187399	49	[2, 0]	2
841	0.412136	0.587864	1	0	49	[2, 0]	2
842	0.412136	0.587864	1	0	49	[2, 0]	2
843	0.412136	0.587864	1	0	49	[1, 1]	1.41421
844	0.412136	0.587864	1	0	49	[1, 0]	1
845	0.412136	0.587864	1	0	49	[1, 0]	1
846	0.412136	0.587864	1	0	49	[1, 0]	1
847	0.412136	0.587864	1	0	49	[1, 1]	1.41421
848	0.412136	0.587864	1	0	49	[0, 0]	0
849	0.412136	0.587864	1	1	50	[1, 0]	1
850	0.413886	0.586114	1	0.858275	50	[1, 0]	1
851	0.413886	0.586114	1	0.858275	50	[0, 0]	0
852	0.413886	0.586114	1	1	51	[1, 0]	1
853	0.413886	0.586114	1	1	51	[0, 0]	0
854	0.413886	0.586114	1	1	52	[1, 0]	1
855	0.414094	0.585906	1	0.983132	52	[2, 0]	2
856	0.41564	0.58436	1	0.857887	52	[2, 1]	2.23607
857	0.415812	0.584188	1	0.843936	52	[3, 1]	3.16228
858	0.420191	0.579809	1	0.489291	52	[2, 1]	2.23607
859	0.42125	0.57875	1	0.403444	52	[2, 2]	2.82843
860	0.422491	0.577509	1	0.302985	52	[1, 3]	3.16228
861	0.42297	0.57703	1	0.264139	52	[2, 2]	2.82843
862	0.423556	0.576444	1	0.216713	52	[2, 3]	3.60555
863	0.424005	0.575995	1	0.180342	52	[2, 2]	2.82843
864	0.424226	0.575774	1	0.162434	52	[2, 2]	2.82843
865	0.424414	0.575586	1	0.147204	52	[2, 1]	2.23607
866	0.426128	0.573872	1	0.00833919	52	[2, 1]	2.23607
867	0.426192	0.573808	1	0.00320579	52	[2, 2]	2.82843
868	0.426231	0.573769	1	0	52	[3, 3]	4.24264
869	0.426231	0.573769	1	0	52	[3, 2]	3.60555
870	0.426231	0.573769	1	0	52	[2, 2]	2.82843
871	0.426231	0.573769	1	0	52	[2, 2]	2.82843
872	0.426231	0.573769	1	0	52	[1, 2]	2.23607
873	0.426231	0.573769	1	0	52	[0, 0]	0
874	0.426231	0.573769	1	1	53	[1, 0]	1
875	0.426751	0.573249	1	0.957899	53	[2, 0]	2
876	0.427289	0.572711	1	0.914332	53	[1, 1]	1.41421
877	0.427339	0.572661	1	0.910273	53	[1, 1]	1.41421
878	0.428184	0.571816	1	0.841852	53	[1, 0]	1
879	0.428227	0.571773	1	0.83834	53	[1, 0]	1
880	0.428881	0.571119	1	0.78536	53	[1, 0]	1
881	0.42892	0.57108	1	0.78222	53	[1, 0]	1
882	0.429023	0.570977	1	0.773849	53	[1, 0]	1
883	0.429113	0.570887	1	0.766559	53	[1, 1]	1.41421
884	0.430471	0.569529	1	0.656571	53	[2, 2]	2.82843
885	0.430772	0.569228	1	0.632199	53	[3, 2]	3.60555
886	0.433529	0.566471	1	0.408912	53	[4, 3]	5
887	0.43549	0.56451	1	0.250045	53	[3, 3]	4.24264
888	0.435681	0.564319	1	0.234549	53	[2, 2]	2.82843
889	0.435733	0.564267	1	0.230373	53	[1, 2]	2.23607
890	0.437393	0.562607	1	0.0959187	53	[1, 2]	2.23607
891	0.438577	0.561423	1	0	53	[1, 2]	2.23607
892	0.438577	0.561423	1	0	53	[1, 1]	1.41421
893	0.438577	0.561423	1	0	53	[0, 0]	0
894	0.438577	0.561423	1	1	54	[1, 0]	1
895	0.438577	0.561423	1	1	54	[0, 0]	0
896	0.438577	0.561423	1	1	55	[1, 0]	1
897	0.439213	0.560787	1	0.94846	55	[2, 0]	2
898	0.440671	0.559329	1	0.830405	55	[1, 0]	1
899	0.442438	0.557562	1	0.687267	55	[2, 1]	2.23607
900	0.442443	0.557557	1	0.686887	55	[2, 0]	2
901	0.443064	0.556936	1	0.636545	55	[3, 1]	3.16228
902	0.443633	0.556367	1	0.590426	55	[4, 1]	4.12311
903	0.445103	0.554897	1	0.471396	55	[5, 1]	5.09902
904	0.445375	0.554625	1	0.449394	55	[6, 2]	6.32456
905	0.445686	0.554314	1	0.42418	55	[5, 1]	5.09902
906	0.447045	0.552955	1	0.314051	55	[4, 1]	4.12311
907	0.447127	0.552873	1	0.307463	55	[4, 2]	4.47214
908	0.448713	0.551287	1	0.178988	55	[4, 3]	5
909	0.448838	0.551162	1	0.168813	55	[3, 4]	5
910	0.450923	0.549077	1	0	55	[2, 3]	3.60555
911	0.450923	0.549077	1	0	55	[2, 3]	3.60555
912	0.450923	0.549077	1	0	55	[3, 3]	4.24264
913	0.450923	0.549077	1	0	55	[2, 3]	3.60555
914	0.450923	0.549077	1	0	55	[1, 2]	2.23607
915	0.450923	0.549077	1	0	55	[1, 3]	3.16228
916	0.450923	0.549077	1	0	55	[2, 4]	4.47214
917	0.450923	0.549077	1	0	55	[2, 4]	4.47214
918	0.450923	0.549077	1	0	55	[3, 3]	4.24264
919	0.450923	0.549077	1	0	55	[2, 4]	4.47214
920	0.450923	0.549077	1	0	55	[2, 4]	4.47214
921	0.450923	0.549077	1	0	55	[1, 4]	4.12311
922	0.450923	0.549077	1	0	55	[1, 3]	3.16228
923	0.450923	0.549077	1	0	55	[2, 4]	4.47214
924	0.450923	0.549077	1	0	55	[2, 4]	4.47214
925	0.450923	0.549077	1	0	55	[2, 3]	3.60555
926	0.450923	0.549077	1	0	55	[1, 2]	2.23607
927	0.450923	0.549077	1	0	55	[1, 1]	1.41421
928	0.450923	0.549077	1	0	55	[0, 0]	0
929	0.450923	0.549077	1	1	56	[1, 0]	1
930	0.4516	0.5484	1	0.945152	56	[1, 1]	1.41421
931	0.4516	0.5484	1	0.945152	56	[0, 0]	0
932	0.4516	0.5484	1	1	57	[1, 0]	1
933	0.453095	0.546905	1	0.878922	57	[1, 0]	1
934	0.454174	0.545826	1	0.791483	57	[2, 1]	2.23607
935	0.454441	0.545559	1	0.76982	57	[3, 2]	3.60555
936	0.455244	0.544756	1	0.704811	57	[4, 2]	4.47214
937	0.45716	0.54284	1	0.54965	57	[5, 2]	5.38516
938	0.458764	0.541236	1	0.419664	57	[5, 3]	5.83095
939	0.461299	0.538701	1	0.214346	57	[4, 3]	5
940	0.463945	0.536055	1	0	57	[4, 3]	5
941	0.463945	0.536055	1	0	57	[3, 4]	5
942	0.463945	0.536055	1	0	57	[2, 5]	5.38516
943	0.463945	0.536055	1	0	57	[1, 5]	5.09902
944	0.463945	0.536055	1	0	57	[2, 6]	6.32456
945	0.463945	0.536055	1	0	57	[1, 5]	5.09902
946	0.463945	0.536055	1	0	57	[1, 3]	3.16228
947	0.463945	0.536055	1	0	57	[1, 2]	2.23607
948	0.463945	0.536055	1	0	57	[1, 3]	3.16228
949	0.463945	0.536055	1	0	57	[2, 2]	2.82843
950	0.463945	0.536055	1	0	57	[2, 1]	2.23607
951	0.463945	0.536055	1	0	57	[1, 1]	1.41421
952	0.463945	0.536055	1	0	57	[1, 1]	1.41421
953	0.463945	0.536055	1	0	57	[1, 0]	1
954	0.463945	0.536055	1	0	57	[1, 0]	1
955	0.463945	0.536055	1	0	57	[1, 1]	1.41421
956	0.463945	0.536055	1	0	57	[2, 0]	2
957	0.463945	0.536055	1	0	57	[1, 0]	1
958	0.463945	0.536055	1	0	57	[0, 0]	0
959	0.463945	0.536055	1	1	58	[1, 0]	1
960	0.464734	0.535266	1	0.93613	58	[2, 1]	2.23607
961	0.465133	0.534867	1	0.903769	58	[1, 1]	1.41421
962	0.466813	0.533187	1	0.767716	58	[1, 1]	1.41421
963	0.467605	0.532395	1	0.703568	58	[2, 1]	2.23607
964	0.467989	0.532011	1	0.67247	58	[2, 0]	2
965	0.468009	0.531991	1	0.670829	58	[2, 0]	2
966	0.468089	0.531911	1	0.664374	58	[1, 0]	1
967	0.468267	0.531733	1	0.649927	58	[2, 0]	2
968	0.468594	0.531406	1	0.623453	58	[3, 0]	3
969	0.468645	0.531355	1	0.619366	58	[3, 1]	3.16228
970	0.469046	0.530954	1	0.586833	58	[4, 2]	4.47214
971	0.469809	0.530191	1	0.525081	58	[3, 2]	3.60555
972	0.470739	0.529261	1	0.449694	58	[2, 1]	2.23607
973	0.470767	0.529233	1	0.447432	58	[2, 0]	2
974	0.471093	0.528907	1	0.421078	58	[1, 0]	1
975	0.471093	0.528907	1	0.421078	58	[0, 0]	0
976	0.471093	0.528907	1	1	59	[1, 0]	1
977	0.471243	0.528757	1	0.987855	59	[1, 1]	1.41421
978	0.471625	0.528375	1	0.956914	59	[2, 1]	2.23607
979	0.472786	0.527214	1	0.862864	59	[3, 1]	3.16228
980	0.473818	0.526182	1	0.779209	59	[2, 0]	2
981	0.476456	0.523544	1	0.565582	59	[2, 0]	2
982	0.476752	0.523248	1	0.541574	59	[3, 0]	3
983	0.476761	0.523239	1	0.540851	59	[3, 0]	3
984	0.477264	0.522736	1	0.500079	59	[5, 0]	5
985	0.477966	0.522034	1	0.443223	59	[4, 0]	4
986	0.479256	0.520744	1	0.338758	59	[2, 0]	2
987	0.479738	0.520262	1	0.299712	59	[3, 0]	3
988	0.480099	0.519901	1	0.270508	59	[2, 0]	2
989	0.481095	0.518905	1	0.189773	59	[2, 0]	2
990	0.482217	0.517783	1	0.0989028	59	[1, 1]	1.41421
991	0.482217	0.517783	1	0.0989028	59	[0, 0]	0
992	0.482217	0.517783	1	1	60	[1, 0]	1
993	0.484076	0.515924	1	0.849411	60	[2, 0]	2
994	0.485385	0.514615	1	0.743432	60	[2, 0]	2
995	0.486092	0.513908	1	0.686156	60	[2, 1]	2.23607
996	0.486115	0.513885	1	0.684294	60	[2, 2]	2.82843
997	0.48988	0.51012	1	0.379335	60	[2, 3]	3.60555
998	0.491244	0.508756	1	0.268834	60	[2, 3]	3.60555
999	0.493022	0.506978	1	0.124798	60	[1, 3]	3.16228
1000	0.493683	0.506317	1	0.0712876	60	[1, 2]	2.23607
1001	0.494563	0.505437	1	0	60	[1, 1]	1.41421
1002	0.494563	0.505437	1	0	60	[0, 0]	0
1003	0.494563	0.505437	1	1	61	[1, 0]	1
1004	0.494905	0.505095	1	0.972322	61	[2, 1]	2.23607
1005	0.495267	0.504733	1	0.94296	61	[2, 2]	2.82843
1006	0.495367	0.504633	1	0.934866	61	[3, 2]	3.60555
1007	0.495899	0.504101	1	0.891765	61	[3, 3]	4.24264
1008	0.496128	0.503872	1	0.873228	61	[2, 2]	2.82843
1009	0.496137	0.503863	1	0.872513	61	[2, 3]	3.60555
1010	0.49633	0.50367	1	0.856906	61	[1, 4]	4.12311
1011	0.497534	0.502466	1	0.759325	61	[2, 4]	4.47214
1012	0.498894	0.501106	1	0.649206	61	[3, 5]	5.83095
1013	0.498952	0.501048	1	0.644505	61	[3, 5]	5.83095
1014	0.499624	0.500376	1	0.59005	61	[2, 5]	5.38516
1015	0.501189	0.498811	1	0.463253	61	[2, 4]	4.47214
1016	0.501365	0.498635	1	0.449003	61	[3, 4]	5
1017	0.501583	0.498417	1	0.431409	61	[2, 3]	3.60555
1018	0.501677	0.498323	1	0.423795	61	[1, 3]	3.16228
1019	0.501787	0.498213	1	0.414828	61	[1, 1]	1.41421
1020	0.502461	0.497539	1	0.360266	61	[1, 0]	1
1021	0.502891	0.497109	1	0.325416	61	[1, 0]	1
1022	0.502891	0.497109	1	0.325416	61	[0, 0]	0
1023	0.502891	0.497109	1	1	62	[1, 0]	1
1024	0.503226	0.496774	1	0.972912	62	[2, 0]	2
1025	0.504699	0.495301	1	0.853559	62	[4, 0]	4
1026	0.50486	0.49514	1	0.84053	62	[4, 0]	4
1027	0.504914	0.495086	1	0.836181	62	[5, 1]	5.09902
1028	0.506413	0.493587	1	0.71471	62	[4, 2]	4.47214
1029	0.506762	0.493238	1	0.686488	62	[3, 1]	3.16228
1030	0.510333	0.489667	1	0.397219	62	[3, 2]	3.60555
1031	0.510781	0.489219	1	0.360915	62	[3, 1]	3.16228
1032	0.511283	0.488717	1	0.32029	62	[2, 1]	2.23607
1033	0.51133	0.48867	1	0.316415	62	[2, 0]	2
1034	0.511518	0.488482	1	0.301186	62	[2, 0]	2
1035	0.51169	0.48831	1	0.287283	62	[4, 0]	4
1036	0.513084	0.486916	1	0.174349	62	[5, 0]	5
1037	0.513439	0.486561	1	0.14564	62	[5, 0]	5
1038	0.513635	0.486365	1	0.12977	62	[4, 0]	4
1039	0.51383	0.48617	1	0.113927	62	[4, 0]	4
1040	0.514231	0.485769	1	0.0814512	62	[4, 0]	4
1041	0.515237	0.484763	1	0	62	[3, 1]	3.16228
1042	0.515237	0.484763	1	0	62	[2, 2]	2.82843
1043	0.515237	0.484763	1	0	62	[2, 1]	2.23607
1044	0.515237	0.484763	1	0	62	[1, 1]	1.41421
1045	0.515237	0.484763	1	0	62	[0, 0]	0
1046	0.515237	0.484763	1	1	63	[1, 0]	1
1047	0.515237	0.484763	1	1	63	[0, 0]	0
1048	0.515237	0.484763	1	1	64	[1, 0]	1
1049	0.515237	0.484763	1	1	64	[0, 0]	0
1050	0.515237	0.484763	1	1	65	[1, 0]	1
1051	0.518335	0.481665	1	0.749072	65	[2, 0]	2
1052	0.518509	0.481491	1	0.734964	65	[1, 0]	1
1053	0.518509	0.481491	1	0.734964	65	[0, 0]	0
1054	0.518509	0.481491	1	1	66	[1, 0]	1
1055	0.519288	0.480712	1	0.936909	66	[1, 2]	2.23607
1056	0.519431	0.480569	1	0.925341	66	[1, 3]	3.16228
1057	0.519988	0.480012	1	0.880155	66	[1, 2]	2.23607
1058	0.520347	0.479653	1	0.851147	66	[1, 3]	3.16228
1059	0.522084	0.477916	1	0.710382	66	[1, 4]	4.12311
1060	0.5222	0.4778	1	0.70102	66	[1, 3]	3.16228
1061	0.52297	0.47703	1	0.63866	66	[2, 2]	2.82843
1062	0.52305	0.47695	1	0.632155	66	[2, 1]	2.23607
1063	0.523093	0.476907	1	0.628712	66	[1, 0]	1
1064	0.524255	0.475745	1	0.534593	66	[1, 1]	1.41421
1065	0.524255	0.475745	1	0.534593	66	[0, 0]	0
1066	0.524255	0.475745	1	1	67	[1, 0]	1
1067	0.525181	0.474819	1	0.924958	67	[2, 1]	2.23607
1068	0.525934	0.474066	1	0.863994	67	[2, 2]	2.82843
1069	0.528537	0.471463	1	0.653159	67	[3, 1]	3.16228
1070	0.528993	0.471007	1	0.616228	67	[4, 2]	4.47214
1071	0.53057	0.46943	1	0.488419	67	[5, 1]	5.09902
1072	0.530741	0.469259	1	0.474596	67	[4, 0]	4
1073	0.532942	0.467058	1	0.296304	67	[5, 0]	5
1074	0.533041	0.466959	1	0.288287	67	[4, 1]	4.12311
1075	0.53362	0.46638	1	0.241376	67	[5, 2]	5.38516
1076	0.534681	0.465319	1	0.155492	67	[6, 3]	6.7082
1077	0.534681	0.465319	1	0.155446	67	[5, 3]	5.83095
1078	0.536597	0.463403	1	0.000296642	67	[4, 4]	5.65685
1079	0.5366	0.4634	1	0	67	[3, 4]	5
1080	0.5366	0.4634	1	0	67	[4, 3]	5
1081	0.5366	0.4634	1	0	67	[5, 2]	5.38516
1082	0.5366	0.4634	1	0	67	[4, 2]	4.47214
1083	0.5366	0.4634	1	0	67	[3, 3]	4.24264
1084	0.5366	0.4634	1	0	67	[2, 2]	2.82843
1085	0.5366	0.4634	1	0	67	[3, 1]	3.16228
1086	0.5366	0.4634	1	0	67	[2, 0]	2
1087	0.5366	0.4634	1	0	67	[2, 0]	2
1088	0.5366	0.4634	1	0	67	[2, 0]	2
1089	0.5366	0.4634	1	0	67	[0, 0]	0
1090	0.5366	0.4634	1	1	68	[1, 0]	1
1091	0.536748	0.463252	1	0.988043	68	[2, 0]	2
1092	0.538264	0.461736	1	0.865208	68	[3, 0]	3
1093	0.539553	0.460447	1	0.760791	68	[2, 0]	2
1094	0.539925	0.460075	1	0.730718	68	[1, 0]	1
1095	0.539989	0.460011	1	0.725519	68	[2, 0]	2
1096	0.541349	0.458651	1	0.615394	68	[1, 0]	1
1097	0.541611	0.458389	1	0.594099	68	[2, 0]	2
1098	0.542173	0.457827	1	0.548648	68	[2, 0]	2
1099	0.543469	0.456531	1	0.443665	68	[3, 0]	3
1100	0.545341	0.454659	1	0.292039	68	[2, 0]	2
1101	0.545884	0.454116	1	0.248046	68	[1, 0]	1
1102	0.547054	0.452946	1	0.153245	68	[3, 0]	3
1103	0.547406	0.452594	1	0.124751	68	[4, 0]	4
1104	0.548098	0.451902	1	0.0686879	68	[3, 0]	3
1105	0.548946	0.451054	1	0	68	[4, 0]	4
1106	0.548946	0.451054	1	0	68	[3, 1]	3.16228
1107	0.548946	0.451054	1	0	68	[2, 2]	2.82843
1108	0.548946	0.451054	1	0	68	[3, 1]	3.16228
1109	0.548946	0.451054	1	0	68	[4, 2]	4.47214
1110	0.548946	0.451054	1	0	68	[3, 1]	3.16228
1111	0.548946	0.451054	1	0	68	[4, 1]	4.12311
1112	0.548946	0.451054	1	0	68	[3, 0]	3
1113	0.548946	0.451054	1	0	68	[4, 0]	4
1114	0.548946	0.451054	1	0	68	[6, 0]	6
1115	0.548946	0.451054	1	0	68	[6, 0]	6
1116	0.548946	0.451054	1	0	68	[5, 0]	5
1117	0.548946	0.451054	1	0	68	[5, 0]	5
1118	0.548946	0.451054	1	0	68	[5, 0]	5
1119	0.548946	0.451054	1	0	68	[5, 1]	5.09902
1120	0.548946	0.451054	1	0	68	[4, 1]	4.12311
1121	0.548946	0.451054	1	0	68	[3, 2]	3.60555
1122	0.548946	0.451054	1	0	68	[4, 3]	5
1123	0.548946	0.451054	1	0	68	[4, 2]	4.47214
1124	0.548946	0.451054	1	0	68	[5, 2]	5.38516
1125	0.548946	0.451054	1	0	68	[4, 3]	5
1126	0.548946	0.451054	1	0	68	[3, 4]	5
1127	0.548946	0.451054	1	0	68	[2, 4]	4.47214
1128	0.548946	0.451054	1	0	68	[1, 5]	5.09902
1129	0.548946	0.451054	1	0	68	[1, 4]	4.12311
1130	0.548946	0.451054	1	0	68	[1, 3]	3.16228
1131	0.548946	0.451054	1	0	68	[1, 1]	1.41421
1132	0.548946	0.451054	1	0	68	[1, 1]	1.41421
1133	0.548946	0.451054	1	0	68	[0, 0]	0
1134	0.548946	0.451054	1	1	69	[1, 0]	1
1135	0.550609	0.449391	1	0.865282	69	[2, 0]	2
1136	0.556869	0.443131	1	0.358201	69	[3, 0]	3
1137	0.557169	0.442831	1	0.333915	69	[1, 0]	1
1138	0.557169	0.442831	1	0.333915	69	[0, 0]	0
1139	0.557169	0.442831	1	1	70	[1, 0]	1
1140	0.557249	0.442751	1	0.9935	70	[2, 1]	2.23607
1141	0.557322	0.442678	1	0.987621	70	[2, 1]	2.23607
1142	0.557374	0.442626	1	0.983432	70	[2, 1]	2.23607
1143	0.560986	0.439014	1	0.690826	70	[3, 2]	3.60555
1144	0.561638	0.438362	1	0.638051	70	[2, 2]	2.82843
1145	0.561682	0.438318	1	0.634497	70	[3, 1]	3.16228
1146	0.562505	0.437495	1	0.567843	70	[3, 1]	3.16228
1147	0.562924	0.437076	1	0.53385	70	[2, 0]	2
1148	0.56379	0.43621	1	0.463689	70	[2, 0]	2
1149	0.564278	0.435722	1	0.424193	70	[2, 0]	2
1150	0.564652	0.435348	1	0.3939	70	[2, 0]	2
1151	0.565133	0.434867	1	0.354921	70	[1, 0]	1
1152	0.565133	0.434867	1	0.354921	70	[0, 0]	0
1153	0.565133	0.434867	1	1	71	[1, 0]	1
1154	0.565526	0.434474	1	0.968185	71	[1, 0]	1
1155	0.565818	0.434182	1	0.944561	71	[2, 1]	2.23607
1156	0.565879	0.434121	1	0.939557	71	[2, 2]	2.82843
1157	0.565964	0.434036	1	0.932677	71	[1, 1]	1.41421
1158	0.566077	0.433923	1	0.923579	71	[2, 1]	2.23607
1159	0.566584	0.433416	1	0.882509	71	[2, 2]	2.82843
1160	0.566607	0.433393	1	0.880656	71	[3, 1]	3.16228
1161	0.566873	0.433127	1	0.859078	71	[3, 1]	3.16228
1162	0.567512	0.432488	1	0.807316	71	[2, 1]	2.23607
1163	0.567737	0.432263	1	0.789055	71	[3, 1]	3.16228
1164	0.567805	0.432195	1	0.783619	71	[2, 1]	2.23607
1165	0.567837	0.432163	1	0.781005	71	[2, 1]	2.23607
1166	0.567993	0.432007	1	0.768368	71	[2, 2]	2.82843
1167	0.568108	0.431892	1	0.759005	71	[2, 3]	3.60555
1168	0.568146	0.431854	1	0.755995	71	[2, 2]	2.82843
1169	0.568152	0.431848	1	0.755474	71	[3, 2]	3.60555
1170	0.568214	0.431786	1	0.750416	71	[2, 2]	2.82843
1171	0.568412	0.431588	1	0.734426	71	[3, 2]	3.60555
1172	0.568413	0.431587	1	0.734344	71	[2, 2]	2.82843
1173	0.568775	0.431225	1	0.705042	71	[1, 3]	3.16228
1174	0.569165	0.430835	1	0.67339	71	[1, 4]	4.12311
1175	0.569408	0.430592	1	0.653762	71	[1, 5]	5.09902
1176	0.570243	0.429757	1	0.586138	71	[1, 6]	6.08276
1177	0.570371	0.429629	1	0.575714	71	[1, 7]	7.07107
1178	0.572784	0.427216	1	0.380277	71	[2, 8]	8.24621
1179	0.574549	0.425451	1	0.237282	71	[2, 8]	8.24621
1180	0.574894	0.425106	1	0.209391	71	[2, 8]	8.24621
1181	0.574936	0.425064	1	0.205955	71	[1, 8]	8.06226
1182	0.575193	0.424807	1	0.185191	71	[1, 8]	8.06226
1183	0.575226	0.424774	1	0.182496	71	[1, 6]	6.08276
1184	0.575353	0.424647	1	0.172191	71	[2, 5]	5.38516
1185	0.575377	0.424623	1	0.170231	71	[3, 6]	6.7082
1186	0.576525	0.423475	1	0.0772236	71	[2, 5]	5.38516
1187	0.577357	0.422643	1	0.00984316	71	[2, 4]	4.47214
1188	0.577479	0.422521	1	0	71	[2, 4]	4.47214
1189	0.577479	0.422521	1	0	71	[2, 5]	5.38516
1190	0.577479	0.422521	1	0	71	[2, 4]	4.47214
1191	0.577479	0.422521	1	0	71	[1, 3]	3.16228
1192	0.577479	0.422521	1	0	71	[1, 4]	4.12311
1193	0.577479	0.422521	1	0	71	[1, 3]	3.16228
1194	0.577479	0.422521	1	0	71	[1, 2]	2.23607
1195	0.577479	0.422521	1	0	71	[2, 1]	2.23607
1196	0.577479	0.422521	1	0	71	[2, 0]	2
1197	0.577479	0.422521	1	0	71	[2, 0]	2
1198	0.577479	0.422521	1	0	71	[2, 1]	2.23607
1199	0.577479	0.422521	1	0	71	[3, 2]	3.60555
1200	0.577479	0.422521	1	0	71	[2, 1]	2.23607
1201	0.577479	0.422521	1	0	71	[1, 1]	1.41421
1202	0.577479	0.422521	1	0	71	[1, 0]	1
1203	0.577479	0.422521	1	0	71	[2, 0]	2
1204	0.577479	0.422521	1	0	71	[1, 0]	1
1205	0.577479	0.422521	1	0	71	[1, 0]	1
1206	0.577479	0.422521	1	0	71	[0, 0]	0
1207	0.577479	0.422521	1	1	72	[1, 0]	1
1208	0.57758	0.42242	1	0.991784	72	[1, 1]	1.41421
1209	0.57758	0.42242	1	0.991784	72	[0, 0]	0
1210	0.57758	0.42242	1	1	73	[1, 0]	1
1211	0.578452	0.421548	1	0.929432	73	[2, 0]	2
1212	0.578859	0.421141	1	0.896451	73	[2, 0]	2
1213	0.579283	0.420717	1	0.862076	73	[1, 0]	1
1214	0.579552	0.420448	1	0.840275	73	[1, 1]	1.41421
1215	0.579655	0.420345	1	0.831948	73	[1, 0]	1
1216	0.579675	0.420325	1	0.830338	73	[2, 1]	2.23607
1217	0.581125	0.418875	1	0.712858	73	[2, 1]	2.23607
1218	0.581131	0.418869	1	0.712414	73	[3, 0]	3
1219	0.581347	0.418653	1	0.694883	73	[3, 0]	3
1220	0.583555	0.416445	1	0.516068	73	[4, 0]	4
1221	0.583626	0.416374	1	0.510323	73	[3, 0]	3
1222	0.583832	0.416168	1	0.493628	73	[4, 0]	4
1223	0.585488	0.414512	1	0.359498	73	[4, 0]	4
1224	0.58554	0.41446	1	0.355284	73	[3, 0]	3
1225	0.587431	0.412569	1	0.202118	73	[4, 0]	4
1226	0.587708	0.412292	1	0.179679	73	[4, 0]	4
1227	0.588185	0.411815	1	0.141016	73	[5, 0]	5
1228	0.58975	0.41025	1	0.0142454	73	[4, 1]	4.12311
1229	0.589926	0.410074	1	0	73	[3, 1]	3.16228
1230	0.589926	0.410074	1	0	73	[2, 0]	2
1231	0.589926	0.410074	1	0	73	[0, 0]	0
1232	0.589926	0.410074	1	1	74	[1, 0]	1
1233	0.590375	0.409625	1	0.963608	74	[2, 0]	2
1234	0.59087	0.40913	1	0.923533	74	[2, 1]	2.23607
1235	0.593439	0.406561	1	0.715425	74	[1, 0]	1
1236	0.593766	0.406234	1	0.68894	74	[2, 1]	2.23607
1237	0.594577	0.405423	1	0.623248	74	[2, 2]	2.82843
1238	0.59541	0.40459	1	0.555776	74	[3, 1]	3.16228
1239	0.595417	0.404583	1	0.555193	74	[3, 2]	3.60555
1240	0.596264	0.403736	1	0.486656	74	[2, 2]	2.82843
1241	0.596539	0.403461	1	0.464347	74	[2, 2]	2.82843
1242	0.596749	0.403251	1	0.447339	74	[3, 1]	3.16228
1243	0.598028	0.401972	1	0.34376	74	[4, 0]	4
1244	0.5987	0.4013	1	0.289325	74	[4, 0]	4
1245	0.598981	0.401019	1	0.266551	74	[5, 0]	5
1246	0.602272	0.397728	1	0	74	[4, 0]	4
1247	0.602272	0.397728	1	0	74	[3, 1]	3.16228
1248	0.602272	0.397728	1	0	74	[2, 1]	2.23607
1249	0.602272	0.397728	1	0	74	[2, 0]	2
1250	0.602272	0.397728	1	0	74	[1, 0]	1
1251	0.602272	0.397728	1	0	74	[0, 0]	0
1252	0.602272	0.397728	1	1	75	[1, 0]	1
1253	0.602272	0.397728	1	1	75	[0, 0]	0
1254	0.602272	0.397728	1	1	76	[1, 0]	1
1255	0.602272	0.397728	1	1	76	[0, 0]	0
1256	0.602272	0.397728	1	1	77	[1, 0]	1
1257	0.602373	0.397627	1	0.991759	77	[1, 1]	1.41421
1258	0.602429	0.397571	1	0.987234	77	[2, 1]	2.23607
1259	0.602626	0.397374	1	0.971325	77	[3, 0]	3
1260	0.603363	0.396637	1	0.911623	77	[2, 0]	2
1261	0.604043	0.395957	1	0.856529	77	[3, 1]	3.16228
1262	0.604898	0.395102	1	0.787274	77	[3, 2]	3.60555
1263	0.605066	0.394934	1	0.773665	77	[4, 3]	5
1264	0.605307	0.394693	1	0.754164	77	[5, 2]	5.38516
1265	0.60534	0.39466	1	0.751452	77	[4, 3]	5
1266	0.6092	0.3908	1	0.438794	77	[5, 4]	6.40312
1267	0.612112	0.387888	1	0.202959	77	[4, 5]	6.40312
1268	0.612409	0.387591	1	0.178861	77	[5, 4]	6.40312
1269	0.61255	0.38745	1	0.167425	77	[4, 4]	5.65685
1270	0.612868	0.387132	1	0.141696	77	[4, 4]	5.65685
1271	0.613239	0.386761	1	0.11167	77	[3, 3]	4.24264
1272	0.614617	0.385383	1	0	77	[3, 2]	3.60555
1273	0.614617	0.385383	1	0	77	[4, 3]	5
1274	0.614617	0.385383	1	0	77	[3, 3]	4.24264
1275	0.614617	0.385383	1	0	77	[4, 2]	4.47214
1276	0.614617	0.385383	1	0	77	[4, 1]	4.12311
1277	0.614617	0.385383	1	0	77	[3, 0]	3
1278	0.614617	0.385383	1	0	77	[4, 0]	4
1279	0.614617	0.385383	1	0	77	[3, 0]	3
1280	0.614617	0.385383	1	0	77	[2, 1]	2.23607
1281	0.614617	0.385383	1	0	77	[2, 2]	2.82843
1282	0.614617	0.385383	1	0	77	[1, 2]	2.23607
1283	0.614617	0.385383	1	0	77	[2, 3]	3.60555
1284	0.614617	0.385383	1	0	77	[2, 4]	4.47214
1285	0.614617	0.385383	1	0	77	[1, 4]	4.12311
1286	0.614617	0.385383	1	0	77	[1, 3]	3.16228
1287	0.614617	0.385383	1	0	77	[2, 4]	4.47214
1288	0.614617	0.385383	1	0	77	[2, 3]	3.60555
1289	0.614617	0.385383	1	0	77	[1, 3]	3.16228
1290	0.614617	0.385383	1	0	77	[2, 4]	4.47214
1291	0.614617	0.385383	1	0	77	[2, 5]	5.38516
1292	0.614617	0.385383	1	0	77	[1, 6]	6.08276
1293	0.614617	0.385383	1	0	77	[1, 7]	7.07107
1294	0.614617	0.385383	1	0	77	[1, 8]	8.06226
1295	0.614617	0.385383	1	0	77	[1, 8]	8.06226
1296	0.614617	0.385383	1	0	77	[2, 7]	7.28011
1297	0.614617	0.385383	1	0	77	[2, 6]	6.32456
1298	0.614617	0.385383	1	0	77	[1, 5]	5.09902
1299	0.614617	0.385383	1	0	77	[1, 4]	4.12311
1300	0.614617	0.385383	1	0	77	[1, 4]	4.12311
1301	0.614617	0.385383	1	0	77	[1, 3]	3.16228
1302	0.614617	0.385383	1	0	77	[1, 3]	3.16228
1303	0.614617	0.385383	1	0	77	[1, 3]	3.16228
1304	0.614617	0.385383	1	0	77	[1, 3]	3.16228
1305	0.614617	0.385383	1	0	77	[1, 2]	2.23607
1306	0.614617	0.385383	1	0	77	[1, 1]	1.41421
1307	0.614617	0.385383	1	0	77	[0, 0]	0
1308	0.614617	0.385383	1	1	78	[1, 0]	1
1309	0.615281	0.384719	1	0.946203	78	[1, 1]	1.41421
1310	0.615545	0.384455	1	0.924849	78	[2, 2]	2.82843
1311	0.617083	0.382917	1	0.80026	78	[2, 1]	2.23607
1312	0.617676	0.382324	1	0.752287	78	[1, 2]	2.23607
1313	0.61781	0.38219	1	0.741415	78	[1, 2]	2.23607
1314	0.618047	0.381953	1	0.722173	78	[2, 2]	2.82843
1315	0.619057	0.380943	1	0.640352	78	[3, 2]	3.60555
1316	0.619176	0.380824	1	0.630721	78	[2, 1]	2.23607
1317	0.619204	0.380796	1	0.628508	78	[2, 2]	2.82843
1318	0.619245	0.380755	1	0.625179	78	[2, 3]	3.60555
1319	0.619306	0.380694	1	0.620235	78	[1, 2]	2.23607
1320	0.61995	0.38005	1	0.568023	78	[1, 1]	1.41421
1321	0.620139	0.379861	1	0.552721	78	[2, 0]	2
1322	0.620915	0.379085	1	0.489893	78	[2, 1]	2.23607
1323	0.621	0.379	1	0.482991	78	[3, 2]	3.60555
1324	0.621378	0.378622	1	0.452401	78	[4, 3]	5
1325	0.621471	0.378529	1	0.44483	78	[3, 3]	4.24264
1326	0.621536	0.378464	1	0.439577	78	[2, 2]	2.82843
1327	0.622334	0.377666	1	0.374975	78	[3, 1]	3.16228
1328	0.622609	0.377391	1	0.352679	78	[2, 2]	2.82843
1329	0.622615	0.377385	1	0.352229	78	[2, 2]	2.82843
1330	0.622895	0.377105	1	0.329508	78	[1, 3]	3.16228
1331	0.623035	0.376965	1	0.318204	78	[1, 3]	3.16228
1332	0.623061	0.376939	1	0.316042	78	[1, 2]	2.23607
1333	0.62347	0.37653	1	0.282972	78	[1, 3]	3.16228
1334	0.623752	0.376248	1	0.260123	78	[1, 3]	3.16228
1335	0.624962	0.375038	1	0.162118	78	[1, 1]	1.41421
1336	0.624977	0.375023	1	0.160901	78	[1, 0]	1
1337	0.625098	0.374902	1	0.151031	78	[3, 0]	3
1338	0.625762	0.374238	1	0.097265	78	[4, 0]	4
1339	0.62577	0.37423	1	0.0966213	78	[3, 0]	3
1340	0.626637	0.373363	1	0.0263772	78	[4, 1]	4.12311
1341	0.626963	0.373037	1	0	78	[5, 0]	5
1342	0.626963	0.373037	1	0	78	[4, 0]	4
1343	0.626963	0.373037	1	0	78	[4, 0]	4
1344	0.626963	0.373037	1	0	78	[5, 0]	5
1345	0.626963	0.373037	1	0	78	[5, 0]	5
1346	0.626963	0.373037	1	0	78	[6, 1]	6.08276
1347	0.626963	0.373037	1	0	78	[6, 0]	6
1348	0.626963	0.373037	1	0	78	[5, 1]	5.09902
1349	0.626963	0.373037	1	0	78	[4, 0]	4
1350	0.626963	0.373037	1	0	78	[3, 1]	3.16228
1351	0.626963	0.373037	1	0	78	[3, 2]	3.60555
1352	0.626963	0.373037	1	0	78	[2, 1]	2.23607
1353	0.626963	0.373037	1	0	78	[2, 1]	2.23607
1354	0.626963	0.373037	1	0	78	[1, 0]	1
1355	0.626963	0.373037	1	0	78	[1, 0]	1
1356	0.626963	0.373037	1	0	78	[0, 0]	0
1357	0.626963	0.373037	1	1	79	[1, 0]	1
1358	0.628691	0.371309	1	0.859996	79	[2, 1]	2.23607
1359	0.628692	0.371308	1	0.859953	79	[1, 2]	2.23607
1360	0.628933	0.371067	1	0.840404	79	[2, 3]	3.60555
1361	0.628965	0.371035	1	0.837837	79	[2, 2]	2.82843
1362	0.630022	0.369978	1	0.75222	79	[2, 1]	2.23607
1363	0.630309	0.369691	1	0.728999	79	[3, 2]	3.60555
1364	0.630361	0.369639	1	0.72478	79	[3, 1]	3.16228
1365	0.631158	0.368842	1	0.660228	79	[2, 2]	2.82843
1366	0.631167	0.368833	1	0.659476	79	[2, 3]	3.60555
1367	0.631581	0.368419	1	0.625955	79	[2, 4]	4.47214
1368	0.631732	0.368268	1	0.613703	79	[3, 4]	5
1369	0.634861	0.365139	1	0.360287	79	[2, 4]	4.47214
1370	0.634885	0.365115	1	0.358333	79	[1, 4]	4.12311
1371	0.634934	0.365066	1	0.354311	79	[1, 3]	3.16228
1372	0.635	0.365	1	0.34904	79	[1, 1]	1.41421
1373	0.635331	0.364669	1	0.32218	79	[1, 3]	3.16228
1374	0.635351	0.364649	1	0.320597	79	[1, 4]	4.12311
1375	0.637269	0.362731	1	0.165229	79	[2, 5]	5.38516
1376	0.639309	0.360691	1	0	79	[3, 5]	5.83095
1377	0.639309	0.360691	1	0	79	[4, 6]	7.2111
1378	0.639309	0.360691	1	0	79	[4, 5]	6.40312
1379	0.639309	0.360691	1	0	79	[3, 5]	5.83095
1380	0.639309	0.360691	1	0	79	[2, 5]	5.38516
1381	0.639309	0.360691	1	0	79	[1, 4]	4.12311
1382	0.639309	0.360691	1	0	79	[1, 4]	4.12311
1383	0.639309	0.360691	1	0	79	[2, 3]	3.60555
1384	0.639309	0.360691	1	0	79	[3, 3]	4.24264
1385	0.639309	0.360691	1	0	79	[3, 4]	5
1386	0.639309	0.360691	1	0	79	[2, 5]	5.38516
1387	0.639309	0.360691	1	0	79	[1, 4]	4.12311
1388	0.639309	0.360691	1	0	79	[1, 3]	3.16228
1389	0.639309	0.360691	1	0	79	[1, 3]	3.16228
1390	0.639309	0.360691	1	0	79	[1, 2]	2.23607
1391	0.639309	0.360691	1	0	79	[1, 3]	3.16228
1392	0.639309	0.360691	1	0	79	[1, 1]	1.41421
1393	0.639309	0.360691	1	0	79	[1, 3]	3.16228
1394	0.639309	0.360691	1	0	79	[1, 3]	3.16228
1395	0.639309	0.360691	1	0	79	[1, 3]	3.16228
1396	0.639309	0.360691	1	0	79	[2, 4]	4.47214
1397	0.639309	0.360691	1	0	79	[2, 3]	3.60555
1398	0.639309	0.360691	1	0	79	[3, 4]	5
1399	0.639309	0.360691	1	0	79	[2, 4]	4.47214
1400	0.639309	0.360691	1	0	79	[2, 4]	4.47214
1401	0.639309	0.360691	1	0	79	[1, 3]	3.16228
1402	0.639309	0.360691	1	0	79	[1, 3]	3.16228
1403	0.639309	0.360691	1	0	79	[2, 3]	3.60555
1404	0.639309	0.360691	1	0	79	[1, 2]	2.23607
1405	0.639309	0.360691	1	0	79	[1, 1]	1.41421
1406	0.639309	0.360691	1	0	79	[1, 1]	1.41421
1407	0.639309	0.360691	1	0	79	[1, 0]	1
1408	0.639309	0.360691	1	0	79	[1, 1]	1.41421
1409	0.639309	0.360691	1	0	79	[1, 1]	1.41421
1410	0.639309	0.360691	1	0	79	[0, 0]	0
1411	0.639309	0.360691	1	1	80	[1, 0]	1
1412	0.639315	0.360685	1	0.999515	80	[1, 0]	1
1413	0.639327	0.360673	1	0.998502	80	[1, 0]	1
1414	0.640647	0.359353	1	0.89162	80	[2, 0]	2
1415	0.641012	0.358988	1	0.862056	80	[3, 0]	3
1416	0.641128	0.358872	1	0.852644	80	[4, 1]	4.12311
1417	0.641274	0.358726	1	0.840843	80	[5, 1]	5.09902
1418	0.641956	0.358044	1	0.785568	80	[6, 2]	6.32456
1419	0.641971	0.358029	1	0.784363	80	[6, 1]	6.08276
1420	0.642213	0.357787	1	0.764755	80	[5, 1]	5.09902
1421	0.642343	0.357657	1	0.754209	80	[6, 1]	6.08276
1422	0.642524	0.357476	1	0.739525	80	[6, 2]	6.32456
1423	0.643721	0.356279	1	0.642621	80	[6, 1]	6.08276
1424	0.643775	0.356225	1	0.638198	80	[7, 2]	7.28011
1425	0.645667	0.354333	1	0.484938	80	[6, 2]	6.32456
1426	0.646803	0.353197	1	0.392955	80	[6, 2]	6.32456
1427	0.647214	0.352786	1	0.3597	80	[6, 2]	6.32456
1428	0.648945	0.351055	1	0.219453	80	[5, 3]	5.83095
1429	0.650638	0.349362	1	0.0823593	80	[6, 4]	7.2111
1430	0.651079	0.348921	1	0.0466349	80	[6, 3]	6.7082
1431	0.651597	0.348403	1	0.00465227	80	[5, 2]	5.38516
1432	0.651654	0.348346	1	0	80	[4, 2]	4.47214
1433	0.651654	0.348346	1	0	80	[4, 2]	4.47214
1434	0.651654	0.348346	1	0	80	[3, 2]	3.60555
1435	0.651654	0.348346	1	0	80	[2, 3]	3.60555
1436	0.651654	0.348346	1	0	80	[2, 3]	3.60555
1437	0.651654	0.348346	1	0	80	[2, 2]	2.82843
1438	0.651654	0.348346	1	0	80	[1, 1]	1.41421
1439	0.651654	0.348346	1	0	80	[2, 2]	2.82843
1440	0.651654	0.348346	1	0	80	[1, 2]	2.23607
1441	0.651654	0.348346	1	0	80	[1, 3]	3.16228
1442	0.651654	0.348346	1	0	80	[1, 3]	3.16228
1443	0.651654	0.348346	1	0	80	[2, 4]	4.47214
1444	0.651654	0.348346	1	0	80	[1, 3]	3.16228
1445	0.651654	0.348346	1	0	80	[1, 2]	2.23607
1446	0.651654	0.348346	1	0	80	[1, 3]	3.16228
1447	0.651654	0.348346	1	0	80	[1, 2]	2.23607
1448	0.651654	0.348346	1	0	80	[1, 2]	2.23607
1449	0.651654	0.348346	1	0	80	[1, 1]	1.41421
1450	0.651654	0.348346	1	0	80	[2, 1]	2.23607
1451	0.651654	0.348346	1	0	80	[1, 0]	1
1452	0.651654	0.348346	1	0	80	[2, 0]	2
1453	0.651654	0.348346	1	0	80	[1, 1]	1.41421
1454	0.651654	0.348346	1	0	80	[0, 0]	0
1455	0.651654	0.348346	1	1	81	[1, 0]	1
1456	0.6517	0.3483	1	0.996292	81	[2, 0]	2
1457	0.652115	0.347885	1	0.962699	81	[1, 1]	1.41421
1458	0.65237	0.34763	1	0.942034	81	[2, 1]	2.23607
1459	0.653059	0.346941	1	0.886237	81	[1, 2]	2.23607
1460	0.653117	0.346883	1	0.881518	81	[1, 1]	1.41421
1461	0.653588	0.346412	1	0.843377	81	[1, 2]	2.23607
1462	0.653837	0.346163	1	0.823216	81	[1, 2]	2.23607
1463	0.654365	0.345635	1	0.780408	81	[1, 1]	1.41421
1464	0.657538	0.342462	1	0.523429	81	[2, 2]	2.82843
1465	0.659343	0.340657	1	0.377184	81	[2, 3]	3.60555
1466	0.659821	0.340179	1	0.338484	81	[2, 2]	2.82843
1467	0.659876	0.340124	1	0.334043	81	[3, 1]	3.16228
1468	0.660011	0.339989	1	0.323091	81	[3, 0]	3
1469	0.660158	0.339842	1	0.311226	81	[4, 0]	4
1470	0.660194	0.339806	1	0.308329	81	[2, 0]	2
1471	0.660223	0.339777	1	0.305919	81	[2, 0]	2
1472	0.661707	0.338293	1	0.18574	81	[3, 0]	3
1473	0.661816	0.338184	1	0.176924	81	[2, 0]	2
1474	0.662543	0.337457	1	0.117989	81	[3, 0]	3
1475	0.662569	0.337431	1	0.115881	81	[2, 0]	2
1476	0.662579	0.337421	1	0.115144	81	[2, 0]	2
1477	0.66359	0.33641	1	0.0332526	81	[3, 0]	3
1478	0.663612	0.336388	1	0.0314519	81	[5, 0]	5
1479	0.663694	0.336306	1	0.0247595	81	[6, 0]	6
1480	0.6637	0.3363	1	0.0242995	81	[6, 0]	6
1481	0.664	0.336	1	0	81	[5, 1]	5.09902
1482	0.664	0.336	1	0	81	[4, 2]	4.47214
1483	0.664	0.336	1	0	81	[3, 3]	4.24264
1484	0.664	0.336	1	0	81	[2, 3]	3.60555
1485	0.664	0.336	1	0	81	[1, 2]	2.23607
1486	0.664	0.336	1	0	81	[2, 2]	2.82843
1487	0.664	0.336	1	0	81	[2, 1]	2.23607
1488	0.664	0.336	1	0	81	[2, 2]	2.82843
1489	0.664	0.336	1	0	81	[3, 1]	3.16228
1490	0.664	0.336	1	0	81	[3, 2]	3.60555
1491	0.664	0.336	1	0	81	[4, 2]	4.47214
1492	0.664	0.336	1	0	81	[3, 1]	3.16228
1493	0.664	0.336	1	0	81	[4, 0]	4
1494	0.664	0.336	1	0	81	[2, 0]	2
1495	0.664	0.336	1	0	81	[1, 1]	1.41421
1496	0.664	0.336	1	0	81	[0, 0]	0
1497	0.664	0.336	1	1	82	[1, 0]	1
1498	0.664448	0.335552	1	0.96369	82	[2, 1]	2.23607
1499	0.6662	0.3338	1	0.821801	82	[3, 0]	3
1500	0.666258	0.333742	1	0.817133	82	[2, 0]	2
1501	0.666423	0.333577	1	0.803774	82	[3, 0]	3
1502	0.666556	0.333444	1	0.792961	82	[3, 1]	3.16228
1503	0.666682	0.333318	1	0.782747	82	[3, 0]	3
1504	0.666691	0.333309	1	0.782066	82	[2, 0]	2
1505	0.666801	0.333199	1	0.773096	82	[2, 0]	2
1506	0.666946	0.333054	1	0.761351	82	[3, 1]	3.16228
1507	0.667571	0.332429	1	0.710741	82	[3, 0]	3
1508	0.6677	0.3323	1	0.700315	82	[3, 1]	3.16228
1509	0.669208	0.330792	1	0.578161	82	[4, 2]	4.47214
1510	0.66922	0.33078	1	0.577188	82	[3, 1]	3.16228
1511	0.669226	0.330774	1	0.576727	82	[2, 0]	2
1512	0.669235	0.330765	1	0.575944	82	[2, 0]	2
1513	0.669599	0.330401	1	0.546474	82	[3, 0]	3
1514	0.670235	0.329765	1	0.494972	82	[4, 0]	4
1515	0.670383	0.329617	1	0.482995	82	[5, 1]	5.09902
1516	0.670603	0.329397	1	0.465152	82	[6, 1]	6.08276
1517	0.670712	0.329288	1	0.456372	82	[7, 2]	7.28011
1518	0.670855	0.329145	1	0.44471	82	[7, 1]	7.07107
1519	0.672323	0.327677	1	0.325802	82	[7, 0]	7
1520	0.673092	0.326908	1	0.263521	82	[7, 0]	7
1521	0.673406	0.326594	1	0.238144	82	[6, 0]	6
1522	0.673652	0.326348	1	0.21816	82	[7, 0]	7
1523	0.676346	0.323654	1	0	82	[6, 1]	6.08276
1524	0.676346	0.323654	1	0	82	[5, 1]	5.09902
1525	0.676346	0.323654	1	0	82	[4, 1]	4.12311
1526	0.676346	0.323654	1	0	82	[3, 1]	3.16228
1527	0.676346	0.323654	1	0	82	[3, 0]	3
1528	0.676346	0.323654	1	0	82	[4, 0]	4
1529	0.676346	0.323654	1	0	82	[5, 0]	5
1530	0.676346	0.323654	1	0	82	[4, 0]	4
1531	0.676346	0.323654	1	0	82	[4, 1]	4.12311
1532	0.676346	0.323654	1	0	82	[4, 0]	4
1533	0.676346	0.323654	1	0	82	[4, 0]	4
1534	0.676346	0.323654	1	0	82	[5, 0]	5
1535	0.676346	0.323654	1	0	82	[4, 0]	4
1536	0.676346	0.323654	1	0	82	[3, 0]	3
1537	0.676346	0.323654	1	0	82	[5, 0]	5
1538	0.676346	0.323654	1	0	82	[5, 1]	5.09902
1539	0.676346	0.323654	1	0	82	[4, 0]	4
1540	0.676346	0.323654	1	0	82	[5, 1]	5.09902
1541	0.676346	0.323654	1	0	82	[5, 1]	5.09902
1542	0.676346	0.323654	1	0	82	[4, 2]	4.47214
1543	0.676346	0.323654	1	0	82	[4, 2]	4.47214
1544	0.676346	0.323654	1	0	82	[3, 2]	3.60555
1545	0.676346	0.323654	1	0	82	[3, 1]	3.16228
1546	0.676346	0.323654	1	0	82	[3, 0]	3
1547	0.676346	0.323654	1	0	82	[3, 0]	3
1548	0.676346	0.323654	1	0	82	[4, 1]	4.12311
1549	0.676346	0.323654	1	0	82	[4, 1]	4.12311
1550	0.676346	0.323654	1	0	82	[3, 0]	3
1551	0.676346	0.323654	1	0	82	[1, 0]	1
1552	0.676346	0.323654	1	0	82	[2, 0]	2
1553	0.676346	0.323654	1	0	82	[3, 1]	3.16228
1554	0.676346	0.323654	1	0	82	[3, 1]	3.16228
1555	0.676346	0.323654	1	0	82	[4, 0]	4
1556	0.676346	0.323654	1	0	82	[4, 0]	4
1557	0.676346	0.323654	1	0	82	[5, 1]	5.09902
1558	0.676346	0.323654	1	0	82	[5, 0]	5
1559	0.676346	0.323654	1	0	82	[4, 0]	4
1560	0.676346	0.323654	1	0	82	[5, 1]	5.09902
1561	0.676346	0.323654	1	0	82	[5, 1]	5.09902
1562	0.676346	0.323654	1	0	82	[4, 1]	4.12311
1563	0.676346	0.323654	1	0	82	[5, 2]	5.38516
1564	0.676346	0.323654	1	0	82	[4, 1]	4.12311
1565	0.676346	0.323654	1	0	82	[3, 1]	3.16228
1566	0.676346	0.323654	1	0	82	[2, 2]	2.82843
1567	0.676346	0.323654	1	0	82	[2, 1]	2.23607
1568	0.676346	0.323654	1	0	82	[1, 0]	1
1569	0.676346	0.323654	1	0	82	[2, 1]	2.23607
1570	0.676346	0.323654	1	0	82	[2, 0]	2
1571	0.676346	0.323654	1	0	82	[2, 0]	2
1572	0.676346	0.323654	1	0	82	[1, 0]	1
1573	0.676346	0.323654	1	0	82	[1, 0]	1
1574	0.676346	0.323654	1	0	82	[1, 0]	1
1575	0.676346	0.323654	1	0	82	[2, 0]	2
1576	0.676346	0.323654	1	0	82	[1, 1]	1.41421
1577	0.676346	0.323654	1	0	82	[1, 1]	1.41421
1578	0.676346	0.323654	1	0	82	[1, 1]	1.41421
1579	0.676346	0.323654	1	0	82	[1, 0]	1
1580	0.676346	0.323654	1	0	82	[0, 0]	0
1581	0.676346	0.323654	1	1	83	[1, 0]	1
1582	0.67643	0.32357	1	0.993211	83	[2, 0]	2
1583	0.676446	0.323554	1	0.991854	83	[3, 0]	3
1584	0.676519	0.323481	1	0.986	83	[3, 1]	3.16228
1585	0.676709	0.323291	1	0.970582	83	[4, 2]	4.47214
1586	0.676728	0.323272	1	0.969022	83	[3, 1]	3.16228
1587	0.677803	0.322197	1	0.881945	83	[2, 1]	2.23607
1588	0.677804	0.322196	1	0.881879	83	[3, 0]	3
1589	0.677805	0.322195	1	0.881795	83	[3, 1]	3.16228
1590	0.677808	0.322192	1	0.88159	83	[3, 0]	3
1591	0.678411	0.321589	1	0.832708	83	[2, 0]	2
1592	0.67884	0.32116	1	0.79795	83	[2, 0]	2
1593	0.678892	0.321108	1	0.793756	83	[1, 0]	1
1594	0.678924	0.321076	1	0.791171	83	[1, 0]	1
1595	0.679914	0.320086	1	0.710937	83	[2, 1]	2.23607
1596	0.679926	0.320074	1	0.709979	83	[2, 1]	2.23607
1597	0.680064	0.319936	1	0.698856	83	[1, 0]	1
1598	0.680064	0.319936	1	0.698856	83	[0, 0]	0
1599	0.680064	0.319936	1	1	84	[1, 0]	1
1600	0.6803	0.3197	1	0.980879	84	[2, 0]	2
1601	0.682233	0.317767	1	0.824302	84	[2, 1]	2.23607
1602	0.682475	0.317525	1	0.804643	84	[1, 2]	2.23607
1603	0.685558	0.314442	1	0.554975	84	[1, 3]	3.16228
1604	0.686779	0.313221	1	0.456052	84	[1, 4]	4.12311
1605	0.686785	0.313215	1	0.45559	84	[2, 5]	5.38516
1606	0.686832	0.313168	1	0.451773	84	[2, 5]	5.38516
1607	0.690753	0.309247	1	0.134166	84	[3, 5]	5.83095
1608	0.690872	0.309128	1	0.12449	84	[4, 4]	5.65685
1609	0.691192	0.308808	1	0.0985607	84	[3, 3]	4.24264
1610	0.691775	0.308225	1	0.0513453	84	[4, 4]	5.65685
1611	0.692225	0.307775	1	0.014924	84	[3, 3]	4.24264
1612	0.692244	0.307756	1	0.0133475	84	[3, 3]	4.24264
1613	0.692409	0.307591	1	0	84	[2, 2]	2.82843
1614	0.692409	0.307591	1	0	84	[3, 3]	4.24264
1615	0.692409	0.307591	1	0	84	[4, 2]	4.47214
1616	0.692409	0.307591	1	0	84	[3, 1]	3.16228
1617	0.692409	0.307591	1	0	84	[2, 0]	2
1618	0.692409	0.307591	1	0	84	[1, 0]	1
1619	0.692409	0.307591	1	0	84	[1, 0]	1
1620	0.692409	0.307591	1	0	84	[0, 0]	0
1621	0.692409	0.307591	1	1	85	[1, 0]	1
1622	0.694047	0.305953	1	0.867319	85	[1, 1]	1.41421
1623	0.69415	0.30585	1	0.858995	85	[1, 2]	2.23607
1624	0.694167	0.305833	1	0.857592	85	[2, 3]	3.60555
1625	0.699247	0.300753	1	0.446157	85	[2, 4]	4.47214
1626	0.701433	0.298567	1	0.269039	85	[3, 3]	4.24264
1627	0.701554	0.298446	1	0.259298	85	[3, 2]	3.60555
1628	0.701561	0.298439	1	0.258698	85	[3, 1]	3.16228
1629	0.702071	0.297929	1	0.217429	85	[4, 0]	4
1630	0.702681	0.297319	1	0.168003	85	[4, 0]	4
1631	0.704755	0.295245	1	0	85	[4, 0]	4
1632	0.704755	0.295245	1	0	85	[5, 0]	5
1633	0.704755	0.295245	1	0	85	[6, 1]	6.08276
1634	0.704755	0.295245	1	0	85	[6, 2]	6.32456
1635	0.704755	0.295245	1	0	85	[6, 2]	6.32456
1636	0.704755	0.295245	1	0	85	[5, 1]	5.09902
1637	0.704755	0.295245	1	0	85	[6, 0]	6
1638	0.704755	0.295245	1	0	85	[6, 1]	6.08276
1639	0.704755	0.295245	1	0	85	[7, 1]	7.07107
1640	0.704755	0.295245	1	0	85	[6, 0]	6
1641	0.704755	0.295245	1	0	85	[5, 0]	5
1642	0.704755	0.295245	1	0	85	[6, 1]	6.08276
1643	0.704755	0.295245	1	0	85	[7, 2]	7.28011
1644	0.704755	0.295245	1	0	85	[6, 3]	6.7082
1645	0.704755	0.295245	1	0	85	[5, 4]	6.40312
1646	0.704755	0.295245	1	0	85	[4, 3]	5
1647	0.704755	0.295245	1	0	85	[3, 3]	4.24264
1648	0.704755	0.295245	1	0	85	[3, 2]	3.60555
1649	0.704755	0.295245	1	0	85	[3, 1]	3.16228
1650	0.704755	0.295245	1	0	85	[3, 1]	3.16228
1651	0.704755	0.295245	1	0	85	[2, 1]	2.23607
1652	0.704755	0.295245	1	0	85	[2, 0]	2
1653	0.704755	0.295245	1	0	85	[2, 0]	2
1654	0.704755	0.295245	1	0	85	[2, 0]	2
1655	0.704755	0.295245	1	0	85	[2, 0]	2
1656	0.704755	0.295245	1	0	85	[1, 0]	1
1657	0.704755	0.295245	1	0	85	[0, 0]	0
1658	0.704755	0.295245	1	1	86	[1, 0]	1
1659	0.705065	0.294935	1	0.974879	86	[1, 1]	1.41421
1660	0.706711	0.293289	1	0.841592	86	[2, 2]	2.82843
1661	0.70682	0.29318	1	0.832704	86	[2, 2]	2.82843
1662	0.708644	0.291356	1	0.684987	86	[2, 3]	3.60555
1663	0.709187	0.290813	1	0.641016	86	[3, 4]	5
1664	0.70927	0.29073	1	0.63429	86	[4, 5]	6.40312
1665	0.709706	0.290294	1	0.598933	86	[3, 4]	5
1666	0.710155	0.289845	1	0.56258	86	[2, 3]	3.60555
1667	0.711348	0.288652	1	0.465969	86	[1, 2]	2.23607
1668	0.712752	0.287248	1	0.352227	86	[1, 1]	1.41421
1669	0.712752	0.287248	1	0.352227	86	[0, 0]	0
1670	0.712752	0.287248	1	1	87	[1, 0]	1
1671	0.713445	0.286555	1	0.943895	87	[2, 0]	2
1672	0.713818	0.286182	1	0.913646	87	[2, 0]	2
1673	0.713911	0.286089	1	0.906119	87	[1, 0]	1
1674	0.714913	0.285087	1	0.824942	87	[2, 0]	2
1675	0.71696	0.28304	1	0.659179	87	[3, 0]	3
1676	0.718226	0.281774	1	0.556621	87	[3, 1]	3.16228
1677	0.718485	0.281515	1	0.535641	87	[2, 0]	2
1678	0.718581	0.281419	1	0.527854	87	[2, 0]	2
1679	0.718647	0.281353	1	0.522491	87	[1, 1]	1.41421
1680	0.721793	0.278207	1	0.267652	87	[1, 2]	2.23607
1681	0.72413	0.27587	1	0.0783576	87	[1, 2]	2.23607
1682	0.724497	0.275503	1	0.0486555	87	[2, 2]	2.82843
1683	0.724574	0.275426	1	0.0424088	87	[3, 1]	3.16228
1684	0.725098	0.274902	1	0	87	[2, 2]	2.82843
1685	0.725098	0.274902	1	0	87	[3, 1]	3.16228
1686	0.725098	0.274902	1	0	87	[2, 0]	2
1687	0.725098	0.274902	1	0	87	[1, 1]	1.41421
1688	0.725098	0.274902	1	0	87	[1, 1]	1.41421
1689	0.725098	0.274902	1	0	87	[1, 1]	1.41421
1690	0.725098	0.274902	1	0	87	[0, 0]	0
1691	0.725098	0.274902	1	1	88	[1, 0]	1
1692	0.725307	0.274693	1	0.983057	88	[2, 1]	2.23607
1693	0.72551	0.27449	1	0.966637	88	[3, 2]	3.60555
1694	0.725761	0.274239	1	0.946271	88	[4, 3]	5
1695	0.725776	0.274224	1	0.945068	88	[3, 3]	4.24264
1696	0.726088	0.273912	1	0.919768	88	[4, 3]	5
1697	0.726102	0.273898	1	0.918642	88	[5, 4]	6.40312
1698	0.726261	0.273739	1	0.905755	88	[5, 3]	5.83095
1699	0.726671	0.273329	1	0.872541	88	[6, 3]	6.7082
1700	0.729116	0.270884	1	0.674512	88	[7, 4]	8.06226
1701	0.729593	0.270407	1	0.635854	88	[6, 3]	6.7082
1702	0.730873	0.269127	1	0.532212	88	[7, 4]	8.06226
1703	0.731095	0.268905	1	0.514189	88	[6, 4]	7.2111
1704	0.73115	0.26885	1	0.509751	88	[6, 5]	7.81025
1705	0.731521	0.268479	1	0.479728	88	[7, 6]	9.21954
1706	0.733008	0.266992	1	0.359291	88	[6, 5]	7.81025
1707	0.733008	0.266992	1	0.35928	88	[5, 4]	6.40312
1708	0.733876	0.266124	1	0.288966	88	[6, 3]	6.7082
1709	0.734007	0.265993	1	0.278334	88	[6, 3]	6.7082
1710	0.734574	0.265426	1	0.232438	88	[6, 4]	7.2111
1711	0.735179	0.264821	1	0.18342	88	[6, 4]	7.2111
1712	0.735304	0.264696	1	0.173312	88	[5, 3]	5.83095
1713	0.73531	0.26469	1	0.172849	88	[5, 4]	6.40312
1714	0.735385	0.264615	1	0.166733	88	[4, 4]	5.65685
1715	0.735438	0.264562	1	0.16241	88	[4, 4]	5.65685
1716	0.735495	0.264505	1	0.157853	88	[3, 4]	5
1717	0.73589	0.26411	1	0.125844	88	[4, 4]	5.65685
1718	0.736189	0.263811	1	0.101584	88	[4, 5]	6.40312
1719	0.737193	0.262807	1	0.0202764	88	[3, 6]	6.7082
1720	0.737298	0.262702	1	0.0117881	88	[3, 5]	5.83095
1721	0.737443	0.262557	1	0	88	[2, 6]	6.32456
1722	0.737443	0.262557	1	0	88	[2, 6]	6.32456
1723	0.737443	0.262557	1	0	88	[2, 6]	6.32456
1724	0.737443	0.262557	1	0	88	[1, 6]	6.08276
1725	0.737443	0.262557	1	0	88	[1, 8]	8.06226
1726	0.737443	0.262557	1	0	88	[1, 7]	7.07107
1727	0.737443	0.262557	1	0	88	[1, 6]	6.08276
1728	0.737443	0.262557	1	0	88	[1, 5]	5.09902
1729	0.737443	0.262557	1	0	88	[1, 4]	4.12311
1730	0.737443	0.262557	1	0	88	[1, 5]	5.09902
1731	0.737443	0.262557	1	0	88	[1, 5]	5.09902
1732	0.737443	0.262557	1	0	88	[1, 5]	5.09902
1733	0.737443	0.262557	1	0	88	[1, 5]	5.09902
1734	0.737443	0.262557	1	0	88	[1, 4]	4.12311
1735	0.737443	0.262557	1	0	88	[1, 3]	3.16228
1736	0.737443	0.262557	1	0	88	[1, 3]	3.16228
1737	0.737443	0.262557	1	0	88	[1, 4]	4.12311
1738	0.737443	0.262557	1	0	88	[1, 3]	3.16228
1739	0.737443	0.262557	1	0	88	[2, 2]	2.82843
1740	0.737443	0.262557	1	0	88	[3, 3]	4.24264
1741	0.737443	0.262557	1	0	88	[2, 2]	2.82843
1742	0.737443	0.262557	1	0	88	[2, 1]	2.23607
1743	0.737443	0.262557	1	0	88	[2, 1]	2.23607
1744	0.737443	0.262557	1	0	88	[3, 1]	3.16228
1745	0.737443	0.262557	1	0	88	[2, 0]	2
1746	0.737443	0.262557	1	0	88	[1, 0]	1
1747	0.737443	0.262557	1	0	88	[1, 0]	1
1748	0.737443	0.262557	1	0	88	[0, 0]	0
1749	0.737443	0.262557	1	1	89	[1, 0]	1
1750	0.737443	0.262557	1	1	89	[0, 0]	0
1751	0.737443	0.262557	1	1	90	[1, 0]	1
1752	0.737518	0.262482	1	0.993925	90	[1, 1]	1.41421
1753	0.737593	0.262407	1	0.98785	90	[1, 0]	1
1754	0.737593	0.262407	1	0.98785	90	[0, 0]	0
1755	0.737593	0.262407	1	1	91	[1, 0]	1
1756	0.737893	0.262107	1	0.975728	91	[1, 2]	2.23607
1757	0.738544	0.261456	1	0.923019	91	[1, 1]	1.41421
1758	0.740502	0.259498	1	0.764427	91	[2, 1]	2.23607
1759	0.740505	0.259495	1	0.764134	91	[3, 1]	3.16228
1760	0.740981	0.259019	1	0.725596	91	[3, 2]	3.60555
1761	0.740997	0.259003	1	0.72435	91	[4, 3]	5
1762	0.741291	0.258709	1	0.700523	91	[5, 3]	5.83095
1763	0.741648	0.258352	1	0.671543	91	[4, 2]	4.47214
1764	0.741764	0.258236	1	0.66216	91	[3, 3]	4.24264
1765	0.742347	0.257653	1	0.614944	91	[2, 4]	4.47214
1766	0.742806	0.257194	1	0.577818	91	[3, 3]	4.24264
1767	0.743137	0.256863	1	0.550941	91	[2, 3]	3.60555
1768	0.743216	0.256784	1	0.544574	91	[3, 3]	4.24264
1769	0.743572	0.256428	1	0.51576	91	[3, 4]	5
1770	0.743833	0.256167	1	0.494587	91	[4, 4]	5.65685
1771	0.743895	0.256105	1	0.489544	91	[5, 4]	6.40312
1772	0.743907	0.256093	1	0.488642	91	[6, 4]	7.2111
1773	0.744103	0.255897	1	0.472758	91	[6, 5]	7.81025
1774	0.744299	0.255701	1	0.456838	91	[7, 5]	8.60233
1775	0.744689	0.255311	1	0.42524	91	[6, 5]	7.81025
1776	0.744787	0.255213	1	0.417324	91	[6, 5]	7.81025
1777	0.744862	0.255138	1	0.411247	91	[6, 6]	8.48528
1778	0.745657	0.254343	1	0.346831	91	[7, 5]	8.60233
1779	0.748321	0.251679	1	0.131061	91	[7, 5]	8.60233
1780	0.7484	0.2516	1	0.124658	91	[6, 5]	7.81025
1781	0.748733	0.251267	1	0.0976954	91	[7, 4]	8.06226
1782	0.748741	0.251259	1	0.0970568	91	[7, 3]	7.61577
1783	0.749246	0.250754	1	0.0561407	91	[7, 2]	7.28011
1784	0.749398	0.250602	1	0.0438725	91	[7, 1]	7.07107
1785	0.749824	0.250176	1	0.00932571	91	[6, 1]	6.08276
1786	0.749925	0.250075	1	0.00110771	91	[7, 1]	7.07107
1787	0.749939	0.250061	1	0	91	[6, 2]	6.32456
1788	0.749939	0.250061	1	0	91	[5, 1]	5.09902
1789	0.749939	0.250061	1	0	91	[4, 0]	4
1790	0.749939	0.250061	1	0	91	[3, 0]	3
1791	0.749939	0.250061	1	0	91	[2, 0]	2
1792	0.749939	0.250061	1	0	91	[0, 0]	0
1793	0.749939	0.250061	1	1	92	[1, 0]	1
1794	0.75011	0.24989	1	0.986156	92	[1, 0]	1
1795	0.750647	0.249353	1	0.94267	92	[1, 1]	1.41421
1796	0.751486	0.248514	1	0.87473	92	[1, 3]	3.16228
1797	0.751565	0.248435	1	0.868295	92	[2, 3]	3.60555
1798	0.751572	0.248428	1	0.867702	92	[3, 4]	5
1799	0.751975	0.248025	1	0.835103	92	[4, 5]	6.40312
1800	0.752279	0.247721	1	0.810493	92	[3, 6]	6.7082
1801	0.752595	0.247405	1	0.784874	92	[4, 7]	8.06226
1802	0.752626	0.247374	1	0.782402	92	[3, 7]	7.61577
1803	0.753738	0.246262	1	0.692292	92	[3, 8]	8.544
1804	0.753853	0.246147	1	0.682998	92	[3, 7]	7.61577
1805	0.754952	0.245048	1	0.593939	92	[4, 8]	8.94427
1806	0.755285	0.244715	1	0.566974	92	[3, 7]	7.61577
1807	0.755347	0.244653	1	0.561951	92	[3, 6]	6.7082
1808	0.756022	0.243978	1	0.507273	92	[3, 5]	5.83095
1809	0.75698	0.24302	1	0.429728	92	[4, 5]	6.40312
1810	0.757112	0.242888	1	0.418966	92	[4, 4]	5.65685
1811	0.757239	0.242761	1	0.408707	92	[3, 4]	5
1812	0.757308	0.242692	1	0.403092	92	[2, 3]	3.60555
1813	0.757384	0.242616	1	0.396953	92	[1, 3]	3.16228
1814	0.757694	0.242306	1	0.371858	92	[1, 2]	2.23607
1815	0.758383	0.241617	1	0.316082	92	[1, 1]	1.41421
1816	0.758508	0.241492	1	0.305885	92	[1, 1]	1.41421
1817	0.758584	0.241416	1	0.299769	92	[1, 3]	3.16228
1818	0.759094	0.240906	1	0.258421	92	[1, 2]	2.23607
1819	0.759547	0.240453	1	0.221726	92	[1, 2]	2.23607
1820	0.759666	0.240334	1	0.212159	92	[1, 1]	1.41421
1821	0.759836	0.240164	1	0.198321	92	[1, 0]	1
1822	0.759991	0.240009	1	0.185768	92	[1, 0]	1
1823	0.760296	0.239704	1	0.16106	92	[2, 0]	2
1824	0.760373	0.239627	1	0.154858	92	[1, 0]	1
1825	0.760429	0.239571	1	0.150301	92	[2, 0]	2
1826	0.760429	0.239571	1	0.150301	92	[0, 0]	0
1827	0.760429	0.239571	1	1	93	[1, 0]	1
1828	0.760436	0.239564	1	0.999448	93	[1, 0]	1
1829	0.760673	0.239327	1	0.980247	93	[3, 0]	3
1830	0.76355	0.23645	1	0.74724	93	[3, 1]	3.16228
1831	0.764032	0.235968	1	0.708165	93	[2, 0]	2
1832	0.764058	0.235942	1	0.706112	93	[1, 0]	1
1833	0.764058	0.235942	1	0.706112	93	[0, 0]	0
1834	0.764058	0.235942	1	1	94	[1, 0]	1
1835	0.764925	0.235075	1	0.929732	94	[2, 1]	2.23607
1836	0.765051	0.234949	1	0.919564	94	[2, 2]	2.82843
1837	0.765122	0.234878	1	0.913781	94	[1, 1]	1.41421
1838	0.765421	0.234579	1	0.88959	94	[2, 0]	2
1839	0.76744	0.23256	1	0.726044	94	[1, 1]	1.41421
1840	0.767466	0.232534	1	0.723944	94	[1, 0]	1
1841	0.76749	0.23251	1	0.722007	94	[3, 0]	3
1842	0.767553	0.232447	1	0.716827	94	[3, 0]	3
1843	0.767643	0.232357	1	0.709574	94	[4, 1]	4.12311
1844	0.767807	0.232193	1	0.696284	94	[4, 2]	4.47214
1845	0.769148	0.230852	1	0.587641	94	[5, 3]	5.83095
1846	0.7693	0.2307	1	0.575369	94	[4, 2]	4.47214
1847	0.769877	0.230123	1	0.528652	94	[3, 2]	3.60555
1848	0.769956	0.230044	1	0.522247	94	[2, 1]	2.23607
1849	0.770013	0.229987	1	0.517597	94	[2, 2]	2.82843
1850	0.770937	0.229063	1	0.442749	94	[2, 3]	3.60555
1851	0.77097	0.22903	1	0.440103	94	[1, 3]	3.16228
1852	0.771949	0.228051	1	0.360768	94	[1, 1]	1.41421
1853	0.772069	0.227931	1	0.351109	94	[2, 0]	2
1854	0.772606	0.227394	1	0.307571	94	[3, 1]	3.16228
1855	0.772766	0.227234	1	0.29462	94	[3, 2]	3.60555
1856	0.772907	0.227093	1	0.283216	94	[3, 1]	3.16228
1857	0.772931	0.227069	1	0.281254	94	[3, 0]	3
1858	0.773085	0.226915	1	0.26874	94	[4, 0]	4
1859	0.773296	0.226704	1	0.251689	94	[5, 1]	5.09902
1860	0.7738	0.2262	1	0.210874	94	[5, 0]	5
1861	0.775123	0.224877	1	0.103719	94	[4, 0]	4
1862	0.775203	0.224797	1	0.0972101	94	[3, 0]	3
1863	0.775428	0.224572	1	0.0789999	94	[2, 1]	2.23607
1864	0.775481	0.224519	1	0.0747052	94	[2, 2]	2.82843
1865	0.776403	0.223597	1	0	94	[3, 1]	3.16228
1866	0.776403	0.223597	1	0	94	[2, 1]	2.23607
1867	0.776403	0.223597	1	0	94	[2, 2]	2.82843
1868	0.776403	0.223597	1	0	94	[2, 1]	2.23607
1869	0.776403	0.223597	1	0	94	[1, 1]	1.41421
1870	0.776403	0.223597	1	0	94	[1, 0]	1
1871	0.776403	0.223597	1	0	94	[0, 0]	0
1872	0.776403	0.223597	1	1	95	[1, 0]	1
1873	0.777137	0.222863	1	0.940566	95	[1, 0]	1
1874	0.77751	0.22249	1	0.910373	95	[2, 0]	2
1875	0.777511	0.222489	1	0.910293	95	[2, 1]	2.23607
1876	0.778491	0.221509	1	0.830847	95	[3, 2]	3.60555
1877	0.779111	0.220889	1	0.780684	95	[4, 3]	5
1878	0.779121	0.220879	1	0.779856	95	[3, 4]	5
1879	0.779932	0.220068	1	0.71414	95	[2, 4]	4.47214
1880	0.781207	0.218793	1	0.610889	95	[1, 4]	4.12311
1881	0.781251	0.218749	1	0.607298	95	[1, 3]	3.16228
1882	0.781291	0.218709	1	0.604102	95	[2, 2]	2.82843
1883	0.781448	0.218552	1	0.591362	95	[3, 1]	3.16228
1884	0.78156	0.21844	1	0.582312	95	[3, 1]	3.16228
1885	0.781561	0.218439	1	0.582257	95	[4, 0]	4
1886	0.782108	0.217892	1	0.537894	95	[3, 0]	3
1887	0.782315	0.217685	1	0.521163	95	[4, 1]	4.12311
1888	0.782494	0.217506	1	0.506619	95	[5, 1]	5.09902
1889	0.782808	0.217192	1	0.481191	95	[5, 0]	5
1890	0.782896	0.217104	1	0.474075	95	[6, 0]	6
1891	0.783759	0.216241	1	0.404197	95	[5, 1]	5.09902
1892	0.783979	0.216021	1	0.386374	95	[5, 1]	5.09902
1893	0.784433	0.215567	1	0.349598	95	[4, 0]	4
1894	0.784463	0.215537	1	0.347153	95	[3, 0]	3
1895	0.785551	0.214449	1	0.259022	95	[2, 0]	2
1896	0.785671	0.214329	1	0.249282	95	[2, 0]	2
1897	0.785765	0.214235	1	0.241666	95	[3, 1]	3.16228
1898	0.78758	0.21242	1	0.0946808	95	[4, 1]	4.12311
1899	0.788749	0.211251	1	0	95	[5, 1]	5.09902
1900	0.788749	0.211251	1	0	95	[5, 2]	5.38516
1901	0.788749	0.211251	1	0	95	[5, 1]	5.09902
1902	0.788749	0.211251	1	0	95	[4, 0]	4
1903	0.788749	0.211251	1	0	95	[4, 0]	4
1904	0.788749	0.211251	1	0	95	[3, 0]	3
1905	0.788749	0.211251	1	0	95	[2, 0]	2
1906	0.788749	0.211251	1	0	95	[2, 1]	2.23607
1907	0.788749	0.211251	1	0	95	[1, 1]	1.41421
1908	0.788749	0.211251	1	0	95	[1, 1]	1.41421
1909	0.788749	0.211251	1	0	95	[1, 1]	1.41421
1910	0.788749	0.211251	1	0	95	[0, 0]	0
1911	0.788749	0.211251	1	1	96	[1, 0]	1
1912	0.789112	0.210888	1	0.970613	96	[1, 1]	1.41421
1913	0.789204	0.210796	1	0.963146	96	[1, 0]	1
1914	0.789244	0.210756	1	0.959878	96	[1, 1]	1.41421
1915	0.789518	0.210482	1	0.937734	96	[2, 0]	2
1916	0.789534	0.210466	1	0.936364	96	[3, 0]	3
1917	0.789979	0.210021	1	0.900381	96	[3, 1]	3.16228
1918	0.790293	0.209707	1	0.874945	96	[4, 1]	4.12311
1919	0.790678	0.209322	1	0.843745	96	[5, 0]	5
1920	0.790825	0.209175	1	0.831869	96	[5, 0]	5
1921	0.791613	0.208387	1	0.768025	96	[4, 0]	4
1922	0.792097	0.207903	1	0.728805	96	[4, 0]	4
1923	0.7921	0.2079	1	0.728594	96	[5, 1]	5.09902
1924	0.792227	0.207773	1	0.718262	96	[4, 0]	4
1925	0.792233	0.207767	1	0.717777	96	[4, 1]	4.12311
1926	0.792242	0.207758	1	0.717059	96	[5, 1]	5.09902
1927	0.79248	0.20752	1	0.697738	96	[5, 0]	5
1928	0.792794	0.207206	1	0.672332	96	[4, 0]	4
1929	0.792902	0.207098	1	0.66357	96	[5, 0]	5
1930	0.792907	0.207093	1	0.663194	96	[6, 0]	6
1931	0.793094	0.206906	1	0.648038	96	[6, 0]	6
1932	0.79325	0.20675	1	0.635387	96	[6, 0]	6
1933	0.793356	0.206644	1	0.626807	96	[6, 0]	6
1934	0.793886	0.206114	1	0.583887	96	[5, 0]	5
1935	0.793888	0.206112	1	0.583735	96	[5, 0]	5
1936	0.79394	0.20606	1	0.579494	96	[6, 1]	6.08276
1937	0.794365	0.205635	1	0.545098	96	[6, 2]	6.32456
1938	0.794461	0.205539	1	0.537347	96	[6, 3]	6.7082
1939	0.795012	0.204988	1	0.492649	96	[7, 3]	7.61577
1940	0.79548	0.20452	1	0.454753	96	[8, 3]	8.544
1941	0.797794	0.202206	1	0.267312	96	[8, 4]	8.94427
1942	0.797807	0.202193	1	0.266266	96	[9, 3]	9.48683
1943	0.797817	0.202183	1	0.265459	96	[9, 3]	9.48683
1944	0.800166	0.199834	1	0.0751813	96	[9, 5]	10.2956
1945	0.800501	0.199499	1	0.0481159	96	[9, 4]	9.84886
1946	0.800515	0.199485	1	0.0469781	96	[8, 3]	8.544
1947	0.800532	0.199468	1	0.0455543	96	[7, 4]	8.06226
1948	0.801043	0.198957	1	0.00420875	96	[6, 4]	7.2111
1949	0.801095	0.198905	1	0	96	[6, 5]	7.81025
1950	0.801095	0.198905	1	0	96	[6, 6]	8.48528
1951	0.801095	0.198905	1	0	96	[6, 5]	7.81025
1952	0.801095	0.198905	1	0	96	[6, 5]	7.81025
1953	0.801095	0.198905	1	0	96	[7, 4]	8.06226
1954	0.801095	0.198905	1	0	96	[8, 3]	8.544
1955	0.801095	0.198905	1	0	96	[9, 4]	9.84886
1956	0.801095	0.198905	1	0	96	[9, 2]	9.21954
1957	0.801095	0.198905	1	0	96	[9, 1]	9.05539
1958	0.801095	0.198905	1	0	96	[9, 0]	9
1959	0.801095	0.198905	1	0	96	[8, 0]	8
1960	0.801095	0.198905	1	0	96	[7, 0]	7
1961	0.801095	0.198905	1	0	96	[7, 0]	7
1962	0.801095	0.198905	1	0	96	[7, 1]	7.07107
1963	0.801095	0.198905	1	0	96	[7, 2]	7.28011
1964	0.801095	0.198905	1	0	96	[6, 1]	6.08276
1965	0.801095	0.198905	1	0	96	[5, 2]	5.38516
1966	0.801095	0.198905	1	0	96	[4, 1]	4.12311
1967	0.801095	0.198905	1	0	96	[4, 0]	4
1968	0.801095	0.198905	1	0	96	[4, 0]	4
1969	0.801095	0.198905	1	0	96	[3, 0]	3
1970	0.801095	0.198905	1	0	96	[2, 0]	2
1971	0.801095	0.198905	1	0	96	[3, 0]	3
1972	0.801095	0.198905	1	0	96	[2, 0]	2
1973	0.801095	0.198905	1	0	96	[0, 0]	0
1974	0.801095	0.198905	1	1	97	[1, 0]	1
1975	0.801095	0.198905	1	1	97	[0, 0]	0
1976	0.801095	0.198905	1	1	98	[1, 0]	1
1977	0.801172	0.198828	1	0.993722	98	[1, 1]	1.41421
1978	0.801601	0.198399	1	0.958996	98	[2, 1]	2.23607
1979	0.801921	0.198079	1	0.933095	98	[2, 1]	2.23607
1980	0.802287	0.197713	1	0.9034	98	[1, 0]	1
1981	0.802418	0.197582	1	0.89283	98	[1, 0]	1
1982	0.802647	0.197353	1	0.874281	98	[2, 0]	2
1983	0.803025	0.196975	1	0.843646	98	[2, 1]	2.23607
1984	0.803029	0.196971	1	0.843289	98	[3, 0]	3
1985	0.803063	0.196937	1	0.840575	98	[4, 1]	4.12311
1986	0.803063	0.196937	1	0.84056	98	[3, 2]	3.60555
1987	0.803224	0.196776	1	0.827498	98	[2, 2]	2.82843
1988	0.803695	0.196305	1	0.789327	98	[2, 1]	2.23607
1989	0.80395	0.19605	1	0.768721	98	[3, 0]	3
1990	0.804154	0.195846	1	0.752185	98	[3, 1]	3.16228
1991	0.804214	0.195786	1	0.747354	98	[3, 2]	3.60555
1992	0.804524	0.195476	1	0.722236	98	[4, 2]	4.47214
1993	0.804624	0.195376	1	0.714143	98	[4, 1]	4.12311
1994	0.804715	0.195285	1	0.706719	98	[4, 0]	4
1995	0.804902	0.195098	1	0.691616	98	[5, 1]	5.09902
1996	0.804905	0.195095	1	0.691332	98	[5, 1]	5.09902
1997	0.805136	0.194864	1	0.672636	98	[6, 2]	6.32456
1998	0.806392	0.193608	1	0.570926	98	[6, 3]	6.7082
[truncated: 798,001+ more rows]

## Sheet: Trophallaxis_data_2D
step	colony state	empty colony state	repeat	forager crop	Nest ant crop	interaction volume	position	depth	trip
1	0.00295969	0.99704	1	0.760265	0.239735	0.239735	[1, 0]	1	1
2	0.0057463	0.994254	1	0.53455	0.225716	0.225716	[1, 2]	2.23607	1
3	0.0066924	0.993308	1	0.457916	0.0766338	0.0766338	[1, 3]	3.16228	1
4	0.00807192	0.991928	1	0.346174	0.111741	0.111741	[2, 2]	2.82843	1
5	0.00819385	0.991806	1	0.336298	0.0098765	0.0098765	[1, 1]	1.41421	1
8	0.00846118	0.991539	1	0.978347	0.0216532	0.0216532	[2, 1]	2.23607	2
9	0.00913904	0.990861	1	0.92344	0.054907	0.054907	[1, 0]	1	2
10	0.011149	0.988851	1	0.760629	0.162811	0.162811	[3, 0]	3	2
11	0.0128068	0.987193	1	0.626352	0.134277	0.134277	[2, 0]	2	2
12	0.0152577	0.984742	1	0.427832	0.36133	0.198519	[3, 0]	3	2
13	0.0160755	0.983925	1	0.361587	0.0662456	0.0662456	[4, 0]	4	2
14	0.0166765	0.983324	1	0.312908	0.048679	0.048679	[5, 0]	5	2
15	0.0182415	0.981758	1	0.186138	0.126769	0.126769	[6, 0]	6	2
16	0.0182648	0.981735	1	0.184254	0.128654	0.0018847	[6, 0]	6	2
17	0.0204638	0.979536	1	0.00613573	0.306772	0.178118	[6, 0]	6	2
18	0.0205395	0.97946	1	0	0.00613573	0.00613573	[7, 0]	7	2
104	0.0205841	0.979416	1	0.996389	0.0252642	0.00361103	[1, 1]	1.41421	3
105	0.0222973	0.977703	1	0.857622	0.138767	0.138767	[2, 2]	2.82843	3
106	0.0228011	0.977199	1	0.816815	0.0408064	0.0408064	[3, 1]	3.16228	3
107	0.0251571	0.974843	1	0.625973	0.245749	0.190842	[2, 1]	2.23607	3
108	0.0274602	0.97254	1	0.439425	0.186548	0.186548	[1, 0]	1	3
109	0.0279689	0.972031	1	0.398221	0.227753	0.0412047	[1, 0]	1	3
110	0.0287214	0.971279	1	0.337271	0.06095	0.06095	[3, 0]	3	3
111	0.0291854	0.970815	1	0.299688	0.0375828	0.0375828	[2, 0]	2	3
112	0.029638	0.970362	1	0.263021	0.0976165	0.0366665	[3, 0]	3	3
113	0.0328852	0.967115	1	0	0.508771	0.263021	[2, 1]	2.23607	3
136	0.0333718	0.966628	1	0.960586	0.0394142	0.0394142	[1, 1]	1.41421	4
137	0.0336654	0.966335	1	0.936807	0.0237786	0.0237786	[1, 3]	3.16228	4
138	0.0348311	0.965169	1	0.842387	0.0944204	0.0944204	[2, 2]	2.82843	4
139	0.0363868	0.963613	1	0.716375	0.26029	0.126012	[2, 1]	2.23607	4
140	0.0364879	0.963512	1	0.708185	0.235942	0.00818979	[1, 0]	1	4
141	0.0381617	0.961838	1	0.572608	0.371519	0.135577	[1, 0]	1	4
142	0.0387221	0.961278	1	0.527212	0.305686	0.0453964	[2, 1]	2.23607	4
143	0.0412163	0.958784	1	0.325179	0.296453	0.202032	[2, 2]	2.82843	4
144	0.0412606	0.958739	1	0.321596	0.00358349	0.00358349	[3, 1]	3.16228	4
145	0.0439933	0.956007	1	0.100245	0.360118	0.221351	[2, 0]	2	4
146	0.0452309	0.954769	1	0	0.471764	0.100245	[1, 0]	1	4
149	0.0481261	0.951874	1	0.765491	0.273923	0.234509	[1, 0]	1	5
150	0.0513237	0.948676	1	0.506481	0.532934	0.259011	[1, 0]	1	5
151	0.0519302	0.94807	1	0.457356	0.0491248	0.0491248	[2, 1]	2.23607	5
152	0.0526767	0.947323	1	0.396893	0.0604625	0.0604625	[3, 2]	3.60555	5
153	0.0536861	0.946314	1	0.315128	0.0817658	0.0817658	[3, 3]	4.24264	5
154	0.0550748	0.944925	1	0.202642	0.112485	0.112485	[2, 2]	2.82843	5
155	0.0575766	0.942423	1	0	0.202642	0.202642	[1, 1]	1.41421	5
166	0.0592661	0.940734	1	0.863145	0.136855	0.136855	[3, 0]	3	6
167	0.0647196	0.93528	1	0.421415	0.441731	0.441731	[4, 0]	4	6
168	0.0647537	0.935246	1	0.418652	0.444493	0.00276221	[4, 0]	4	6
169	0.0677312	0.932269	1	0.177474	0.466894	0.241179	[5, 0]	5	6
170	0.0692586	0.930741	1	0.0537524	0.123721	0.123721	[5, 1]	5.09902	6
171	0.0699222	0.930078	1	0	0.119998	0.0537524	[4, 1]	4.12311	6
179	0.0719011	0.928099	1	0.839713	0.160287	0.160287	[2, 1]	2.23607	7
180	0.0734505	0.92655	1	0.714214	0.223115	0.125499	[3, 2]	3.60555	7
181	0.0769011	0.923099	1	0.434715	0.279499	0.279499	[2, 2]	2.82843	7
182	0.0795735	0.920426	1	0.218245	0.49597	0.21647	[2, 2]	2.82843	7
183	0.0811751	0.918825	1	0.0885175	0.129727	0.129727	[1, 3]	3.16228	7
184	0.0812055	0.918795	1	0.0860571	0.00246038	0.00246038	[1, 2]	2.23607	7
185	0.0822679	0.917732	1	0	0.582027	0.0860571	[2, 2]	2.82843	7
192	0.0852996	0.9147	1	0.754435	0.245565	0.245565	[1, 1]	1.41421	8
193	0.0862158	0.913784	1	0.68022	0.0840913	0.0742148	[2, 2]	2.82843	8
194	0.0862399	0.91376	1	0.678268	0.00195223	0.00195223	[3, 3]	4.24264	8
195	0.0867493	0.913251	1	0.637009	0.0412591	0.0412591	[3, 2]	3.60555	8
196	0.0895706	0.910429	1	0.408486	0.340264	0.228523	[4, 3]	5	8
197	0.0898751	0.910125	1	0.383823	0.469156	0.0246631	[4, 4]	5.65685	8
198	0.0903243	0.909676	1	0.347433	0.0383426	0.0363903	[3, 3]	4.24264	8
199	0.0907049	0.909295	1	0.316609	0.0720825	0.0308234	[3, 2]	3.60555	8
200	0.0907061	0.909294	1	0.31651	0.081865	9.92669e-05	[4, 1]	4.12311	8
201	0.0909132	0.909087	1	0.299732	0.0888602	0.0167777	[3, 2]	3.60555	8
202	0.0910586	0.908941	1	0.287955	0.100638	0.0117773	[3, 2]	3.60555	8
203	0.0912117	0.908788	1	0.275553	0.136123	0.0124016	[4, 2]	4.47214	8
204	0.0924854	0.907515	1	0.172382	0.185036	0.103171	[4, 1]	4.12311	8
205	0.0926988	0.907301	1	0.1551	0.550216	0.0172825	[3, 1]	3.16228	8
206	0.0941118	0.905888	1	0.0406447	0.299491	0.114455	[4, 1]	4.12311	8
207	0.0946136	0.905386	1	0	0.590861	0.0406447	[3, 1]	3.16228	8
226	0.0974468	0.902553	1	0.770509	0.229491	0.229491	[2, 0]	2	9
227	0.0993259	0.900674	1	0.618304	0.152205	0.152205	[1, 0]	1	9
228	0.101635	0.898365	1	0.431241	0.432628	0.187063	[1, 1]	1.41421	9
229	0.105448	0.894552	1	0.122434	0.392898	0.308807	[1, 2]	2.23607	9
230	0.105497	0.894503	1	0.118484	0.00395002	0.00395002	[1, 3]	3.16228	9
231	0.105718	0.894282	1	0.100555	0.410827	0.0179286	[1, 2]	2.23607	9
232	0.106431	0.893569	1	0.0428057	0.468577	0.0577497	[1, 2]	2.23607	9
233	0.106959	0.893041	1	0	0.0467558	0.0428057	[1, 3]	3.16228	9
254	0.106967	0.893033	1	0.999353	0.152852	0.000646722	[1, 0]	1	10
255	0.107218	0.892782	1	0.97901	0.173195	0.0203437	[1, 0]	1	10
256	0.107465	0.892535	1	0.959006	0.0575868	0.020004	[2, 1]	2.23607	10
257	0.107497	0.892503	1	0.956406	0.132327	0.00259922	[1, 2]	2.23607	10
260	0.107592	0.892408	1	0.992369	0.180827	0.00763141	[1, 0]	1	11
261	0.109222	0.890778	1	0.860344	0.132025	0.132025	[1, 1]	1.41421	11
262	0.11265	0.88735	1	0.582629	0.277715	0.277715	[2, 0]	2	11
263	0.113507	0.886493	1	0.513201	0.292544	0.0694285	[3, 1]	3.16228	11
264	0.11433	0.88567	1	0.446527	0.344388	0.0666734	[2, 0]	2	11
265	0.114669	0.885331	1	0.419084	0.208271	0.0274438	[1, 0]	1	11
268	0.117644	0.882356	1	0.759061	0.533482	0.240939	[1, 1]	1.41421	12
269	0.119667	0.880333	1	0.595145	0.745943	0.163916	[2, 1]	2.23607	12
270	0.120059	0.879941	1	0.563398	0.240017	0.0317468	[3, 0]	3	12
271	0.122202	0.877798	1	0.389853	0.173545	0.173545	[4, 0]	4	12
272	0.122246	0.877754	1	0.38628	0.177118	0.00357317	[4, 0]	4	12
273	0.124083	0.875917	1	0.237479	0.148801	0.148801	[6, 0]	6	12
274	0.126631	0.873369	1	0.0310722	0.212543	0.206407	[5, 0]	5	12
275	0.127015	0.872985	1	0	0.243615	0.0310722	[5, 0]	5	12
295	0.127849	0.872151	1	0.932482	0.180004	0.0675184	[2, 0]	2	13
296	0.128243	0.871757	1	0.900553	0.0319282	0.0319282	[3, 0]	3	13
297	0.12945	0.87055	1	0.802755	0.129726	0.097798	[3, 0]	3	13
298	0.132305	0.867695	1	0.571477	0.231278	0.231278	[4, 1]	4.12311	13
299	0.132763	0.867237	1	0.534421	0.166782	0.037056	[3, 0]	3	13
300	0.133523	0.866477	1	0.472885	0.0615367	0.0615367	[4, 0]	4	13
301	0.13421	0.86579	1	0.417219	0.0556654	0.0556654	[3, 1]	3.16228	13
302	0.134444	0.865556	1	0.398256	0.15129	0.0189633	[3, 2]	3.60555	13
303	0.135899	0.864101	1	0.280402	0.117854	0.117854	[2, 2]	2.82843	13
304	0.137828	0.862172	1	0.124183	0.274073	0.156219	[2, 2]	2.82843	13
305	0.138505	0.861495	1	0.0692887	0.0548942	0.0548942	[2, 3]	3.60555	13
306	0.139361	0.860639	1	0	0.309306	0.0692887	[3, 4]	5	13
326	0.14001	0.85999	1	0.947379	0.0526212	0.0526212	[1, 0]	1	14
327	0.150139	0.849861	1	0.126988	0.873012	0.820391	[1, 0]	1	14
334	0.154493	0.845507	1	0.647276	0.529842	0.352724	[2, 1]	2.23607	17
335	0.154874	0.845126	1	0.616413	0.500019	0.0308632	[3, 2]	3.60555	17
336	0.15676	0.84324	1	0.463641	0.152772	0.152772	[3, 3]	4.24264	17
337	0.157504	0.842496	1	0.403419	0.109347	0.0602218	[4, 2]	4.47214	17
338	0.16047	0.83953	1	0.163152	0.393039	0.240268	[3, 3]	4.24264	17
339	0.161218	0.838782	1	0.102602	0.0605499	0.0605499	[2, 2]	2.82843	17
340	0.161328	0.838672	1	0.0936957	0.160196	0.00890603	[1, 2]	2.23607	17
341	0.161879	0.838121	1	0.0490016	0.477322	0.044694	[1, 1]	1.41421	17
342	0.162484	0.837516	1	0	0.0525851	0.0490016	[1, 0]	1	17
356	0.162558	0.837442	1	0.994005	0.0312592	0.00599497	[1, 0]	1	19
357	0.163582	0.836418	1	0.911093	0.18355	0.082912	[1, 1]	1.41421	19
358	0.163909	0.836091	1	0.88457	0.026523	0.026523	[2, 1]	2.23607	19
359	0.164136	0.835864	1	0.866182	0.0449113	0.0183883	[2, 1]	2.23607	19
360	0.164602	0.835398	1	0.828443	0.509502	0.0377383	[1, 2]	2.23607	19
361	0.165565	0.834435	1	0.750457	0.261536	0.0779867	[1, 1]	1.41421	19
364	0.165788	0.834212	1	0.981918	0.379412	0.0180818	[2, 0]	2	20
365	0.166845	0.833155	1	0.896348	0.13425	0.0855705	[1, 0]	1	20
368	0.166949	0.833051	1	0.991588	0.145267	0.00841204	[1, 1]	1.41421	21
369	0.167937	0.832063	1	0.911498	0.613572	0.0800895	[1, 0]	1	21
372	0.170494	0.829506	1	0.79289	0.20711	0.20711	[1, 1]	1.41421	22
375	0.171219	0.828781	1	0.941327	0.567443	0.0586727	[2, 1]	2.23607	23
376	0.171509	0.828491	1	0.917836	0.157741	0.0234914	[1, 2]	2.23607	23
377	0.173384	0.826616	1	0.765917	0.448371	0.151919	[2, 3]	3.60555	23
378	0.173887	0.826113	1	0.725148	0.0856811	0.0407698	[3, 4]	5	23
379	0.176467	0.823533	1	0.516204	0.657315	0.208944	[2, 3]	3.60555	23
380	0.176595	0.823405	1	0.505814	0.667705	0.0103893	[2, 3]	3.60555	23
381	0.180316	0.819684	1	0.204475	0.45908	0.301339	[1, 2]	2.23607	23
382	0.181084	0.818916	1	0.142263	0.629655	0.0622114	[2, 1]	2.23607	23
383	0.18151	0.81849	1	0.107714	0.664204	0.0345497	[2, 1]	2.23607	23
384	0.18284	0.81716	1	0	0.107714	0.107714	[2, 0]	2	23
398	0.184888	0.815112	1	0.834099	0.439974	0.165901	[1, 1]	1.41421	24
399	0.187762	0.812238	1	0.601319	0.672754	0.232779	[1, 1]	1.41421	24
400	0.188285	0.811715	1	0.558917	0.0424025	0.0424025	[1, 0]	1	24
401	0.19047	0.80953	1	0.381926	0.3841	0.176991	[2, 0]	2	24
402	0.190721	0.809279	1	0.361643	0.404383	0.0202829	[2, 0]	2	24
403	0.191109	0.808891	1	0.330172	0.704225	0.0314713	[1, 1]	1.41421	24
404	0.191183	0.808817	1	0.324191	0.115328	0.0059813	[1, 2]	2.23607	24
405	0.191604	0.808396	1	0.290109	0.738307	0.0340821	[1, 1]	1.41421	24
406	0.193335	0.806665	1	0.149873	0.369727	0.140236	[1, 3]	3.16228	24
407	0.194129	0.805871	1	0.0856054	0.0880459	0.0642673	[1, 4]	4.12311	24
408	0.194981	0.805019	1	0.0165964	0.438736	0.0690091	[1, 3]	3.16228	24
409	0.195073	0.804927	1	0.00907872	0.122846	0.00751766	[1, 2]	2.23607	24
410	0.195186	0.804814	1	0	0.747386	0.00907872	[1, 1]	1.41421	24
421	0.1952	0.8048	1	0.998831	0.439905	0.00116877	[1, 0]	1	25
422	0.199229	0.800771	1	0.672476	0.434069	0.326356	[2, 0]	2	25
423	0.199388	0.800612	1	0.659584	0.452796	0.0128915	[1, 0]	1	25
424	0.199906	0.800094	1	0.617607	0.494774	0.0419777	[1, 0]	1	25
425	0.200247	0.799753	1	0.590003	0.461673	0.0276036	[2, 0]	2	25
426	0.200641	0.799359	1	0.558097	0.493578	0.0319055	[2, 0]	2	25
427	0.202129	0.797871	1	0.437595	0.208549	0.120503	[1, 1]	1.41421	25
428	0.202165	0.797835	1	0.434677	0.497692	0.00291797	[1, 0]	1	25
431	0.202557	0.797443	1	0.968213	0.0317874	0.0317874	[1, 1]	1.41421	26
432	0.203341	0.796659	1	0.904714	0.362989	0.0634982	[1, 2]	2.23607	26
433	0.203683	0.796317	1	0.877061	0.372041	0.0276532	[1, 3]	3.16228	26
434	0.207395	0.792605	1	0.576379	0.300682	0.300682	[2, 3]	3.60555	26
435	0.208068	0.791932	1	0.521858	0.112108	0.054521	[3, 3]	4.24264	26
436	0.209012	0.790988	1	0.445356	0.076502	0.076502	[3, 4]	5	26
437	0.210545	0.789455	1	0.321235	0.464386	0.124121	[2, 5]	5.38516	26
438	0.211234	0.788766	1	0.265367	0.13237	0.0558677	[3, 4]	5	26
439	0.212141	0.787859	1	0.191934	0.185541	0.0734329	[3, 3]	4.24264	26
440	0.212462	0.787538	1	0.165954	0.405392	0.0259801	[2, 2]	2.82843	26
441	0.212765	0.787235	1	0.141379	0.0563622	0.0245748	[1, 1]	1.41421	26
442	0.214511	0.785489	1	0	0.197742	0.141379	[1, 1]	1.41421	26
446	0.215008	0.784992	1	0.959693	0.533885	0.0403068	[1, 0]	1	27
447	0.216051	0.783949	1	0.875232	0.748666	0.0844612	[1, 1]	1.41421	27
450	0.21631	0.78369	1	0.978983	0.554902	0.0210169	[3, 0]	3	28
451	0.216767	0.783233	1	0.941955	0.591931	0.0370285	[3, 0]	3	28
452	0.218576	0.781424	1	0.795447	0.146508	0.146508	[4, 0]	4	28
453	0.21901	0.78099	1	0.760335	0.627042	0.035111	[3, 0]	3	28
454	0.221388	0.778612	1	0.567697	0.192638	0.192638	[4, 1]	4.12311	28
455	0.222367	0.777633	1	0.488384	0.388619	0.0793129	[4, 2]	4.47214	28
456	0.228397	0.771603	1	0	0.61123	0.488384	[5, 3]	5.83095	28
507	0.233175	0.766825	1	0.612934	0.589709	0.387066	[1, 1]	1.41421	29
508	0.235799	0.764201	1	0.400435	0.456113	0.212499	[2, 0]	2	29
509	0.237089	0.762911	1	0.29595	0.236855	0.104485	[1, 0]	1	29
510	0.240016	0.759984	1	0.058859	0.473946	0.237091	[1, 0]	1	29
511	0.240738	0.759262	1	0.000308782	0.532496	0.0585502	[1, 0]	1	29
512	0.240742	0.759258	1	0	0.532805	0.000308782	[1, 0]	1	29
517	0.242164	0.757836	1	0.884838	0.47528	0.115162	[2, 0]	2	30
518	0.243038	0.756962	1	0.814026	0.546092	0.070812	[2, 0]	2	30
519	0.243775	0.756225	1	0.754323	0.649412	0.0597035	[1, 0]	1	30
522	0.243902	0.756098	1	0.989743	0.883269	0.0102568	[1, 0]	1	31
523	0.246617	0.753383	1	0.769786	0.766049	0.219957	[2, 0]	2	31
524	0.247009	0.752991	1	0.738081	0.797754	0.0317053	[2, 0]	2	31
525	0.252835	0.747165	1	0.266198	0.471882	0.471882	[3, 0]	3	31
526	0.253915	0.746085	1	0.178703	0.232762	0.0874951	[4, 0]	4	31
527	0.256121	0.743879	1	0	0.650586	0.178703	[3, 0]	3	31
535	0.257498	0.742502	1	0.888436	0.1731	0.111564	[1, 1]	1.41421	32
536	0.25794	0.74206	1	0.852665	0.184572	0.035771	[2, 1]	2.23607	32
537	0.258273	0.741727	1	0.825685	0.824735	0.0269805	[2, 0]	2	32
538	0.258637	0.741363	1	0.796178	0.202608	0.0295073	[1, 1]	1.41421	32
539	0.259637	0.740363	1	0.715239	0.26551	0.0809383	[2, 1]	2.23607	32
540	0.260132	0.739868	1	0.675079	0.864895	0.0401606	[2, 0]	2	32
541	0.260507	0.739493	1	0.644707	0.563177	0.0303719	[3, 0]	3	32
542	0.260767	0.739233	1	0.623664	0.0210431	0.0210431	[4, 0]	4	32
543	0.261278	0.738722	1	0.582271	0.60457	0.0413933	[3, 0]	3	32
544	0.262266	0.737734	1	0.502254	0.10106	0.0800169	[4, 0]	4	32
545	0.265295	0.734705	1	0.256944	0.443051	0.245309	[4, 1]	4.12311	32
546	0.265881	0.734119	1	0.209439	0.652075	0.0475049	[3, 0]	3	32
547	0.266089	0.733911	1	0.192608	0.668906	0.0168313	[3, 0]	3	32
548	0.266357	0.733643	1	0.170904	0.886599	0.0217038	[2, 0]	2	32
549	0.267207	0.732793	1	0.102003	0.30018	0.0689018	[1, 0]	1	32
550	0.268467	0.731533	1	0	0.30461	0.102003	[1, 1]	1.41421	32
553	0.268939	0.731061	1	0.961738	0.139322	0.0382625	[2, 0]	2	33
554	0.269358	0.730642	1	0.927829	0.334089	0.0339089	[3, 0]	3	33
555	0.269773	0.730227	1	0.894167	0.781047	0.0336612	[3, 1]	3.16228	33
556	0.270446	0.729554	1	0.839663	0.0545049	0.0545049	[2, 1]	2.23607	33
557	0.271757	0.728243	1	0.733473	0.19187	0.106189	[1, 1]	1.41421	33
558	0.272322	0.727678	1	0.687717	0.0840992	0.0457567	[1, 2]	2.23607	33
559	0.273312	0.726688	1	0.607488	0.212254	0.0802291	[2, 2]	2.82843	33
560	0.274517	0.725483	1	0.50989	0.181696	0.0975971	[1, 2]	2.23607	33
561	0.274752	0.725248	1	0.490907	0.0734885	0.0189836	[2, 1]	2.23607	33
562	0.27559	0.72441	1	0.423	0.534801	0.0679068	[3, 2]	3.60555	33
563	0.277468	0.722532	1	0.270924	0.332079	0.152076	[4, 1]	4.12311	33
564	0.278314	0.721686	1	0.202404	0.849567	0.0685201	[3, 1]	3.16228	33
565	0.27907	0.72093	1	0.141096	0.0613077	0.0613077	[4, 0]	4	33
566	0.280609	0.719391	1	0.0164398	0.458745	0.124657	[3, 0]	3	33
567	0.280748	0.719252	1	0.00517424	0.0725733	0.0112656	[4, 0]	4	33
568	0.280764	0.719236	1	0.00391053	0.592124	0.00126371	[5, 0]	5	33
569	0.280812	0.719188	1	0	0.33599	0.00391053	[4, 1]	4.12311	33
577	0.282949	0.717051	1	0.826912	0.31241	0.173088	[2, 0]	2	34
582	0.286095	0.713905	1	0.74522	0.301535	0.25478	[2, 1]	2.23607	36
583	0.286552	0.713448	1	0.70818	0.249294	0.0370407	[2, 2]	2.82843	36
584	0.287323	0.712677	1	0.645705	0.104877	0.0624744	[1, 2]	2.23607	36
585	0.291754	0.708246	1	0.28678	0.431498	0.358925	[1, 1]	1.41421	36
586	0.29225	0.70775	1	0.246664	0.144993	0.0401165	[1, 2]	2.23607	36
587	0.293218	0.706782	1	0.168209	0.223448	0.0784549	[1, 2]	2.23607	36
588	0.293715	0.706285	1	0.127946	0.471761	0.0402627	[1, 1]	1.41421	36
589	0.294359	0.705641	1	0.0758149	0.27558	0.0521315	[1, 2]	2.23607	36
590	0.295295	0.704705	1	0	0.37735	0.0758149	[2, 1]	2.23607	36
594	0.295718	0.704282	1	0.965746	0.309834	0.0342541	[1, 0]	1	37
595	0.296237	0.703763	1	0.923721	0.291319	0.0420246	[2, 0]	2	37
596	0.30001	0.69999	1	0.618058	0.668653	0.305663	[3, 1]	3.16228	37
597	0.30062	0.69938	1	0.568703	0.454746	0.0493546	[3, 2]	3.60555	37
598	0.300723	0.699277	1	0.560286	0.467497	0.00841706	[2, 1]	2.23607	37
599	0.30124	0.69876	1	0.518474	0.710465	0.0418123	[3, 1]	3.16228	37
600	0.301501	0.698499	1	0.497275	0.488696	0.0211989	[2, 1]	2.23607	37
601	0.302582	0.697418	1	0.409769	0.399916	0.0875061	[1, 1]	1.41421	37
604	0.305089	0.694911	1	0.796903	0.205558	0.203097	[1, 1]	1.41421	38
605	0.305619	0.694381	1	0.75396	0.926211	0.0429424	[2, 2]	2.82843	38
606	0.305726	0.694274	1	0.745347	0.00861281	0.00861281	[2, 1]	2.23607	38
607	0.306629	0.693371	1	0.672179	0.684398	0.0731681	[3, 0]	3	38
608	0.307732	0.692268	1	0.582821	0.773756	0.0893579	[3, 0]	3	38
609	0.307781	0.692219	1	0.578821	0.653413	0.00400029	[4, 0]	4	38
610	0.307789	0.692211	1	0.578246	0.774331	0.000575494	[3, 0]	3	38
611	0.30859	0.69141	1	0.513309	0.0649365	0.0649365	[4, 1]	4.12311	38
612	0.309518	0.690482	1	0.438193	0.447157	0.0751162	[5, 1]	5.09902	38
613	0.312278	0.687722	1	0.214603	0.695351	0.22359	[5, 0]	5	38
614	0.313192	0.686808	1	0.140559	0.306806	0.0740441	[6, 0]	6	38
615	0.313822	0.686178	1	0.0895305	0.746379	0.051028	[5, 0]	5	38
616	0.314397	0.685603	1	0.042948	0.353388	0.0465825	[6, 0]	6	38
617	0.314927	0.685073	1	0	0.531644	0.042948	[6, 1]	6.08276	38
649	0.315204	0.684796	1	0.977566	0.948645	0.0224339	[2, 0]	2	39
650	0.317324	0.682676	1	0.805854	0.171712	0.171712	[3, 0]	3	39
651	0.31735	0.68265	1	0.803733	0.39074	0.00212123	[2, 1]	2.23607	39
652	0.317418	0.682582	1	0.798254	0.177191	0.00547891	[3, 0]	3	39
653	0.319284	0.680716	1	0.647152	0.216038	0.151102	[4, 0]	4	39
654	0.320668	0.679332	1	0.535029	0.328162	0.112124	[4, 0]	4	39
655	0.322574	0.677426	1	0.380593	0.482597	0.154435	[4, 0]	4	39
656	0.324699	0.675301	1	0.208536	0.349248	0.172058	[3, 0]	3	39
657	0.3249	0.6751	1	0.192222	0.865881	0.0163141	[3, 1]	3.16228	39
658	0.324903	0.675097	1	0.191944	0.774609	0.00027764	[3, 2]	3.60555	39
659	0.325155	0.674845	1	0.171587	0.47647	0.020357	[4, 2]	4.47214	39
660	0.325391	0.674609	1	0.152416	0.885052	0.0191709	[3, 1]	3.16228	39
661	0.325849	0.674151	1	0.115347	0.480119	0.0370686	[2, 2]	2.82843	39
662	0.326478	0.673522	1	0.064432	0.0509155	0.0509155	[1, 1]	1.41421	39
663	0.327273	0.672727	1	0	0.304167	0.064432	[1, 2]	2.23607	39
666	0.327885	0.672115	1	0.950409	0.0808505	0.0495913	[2, 1]	2.23607	40
667	0.328745	0.671255	1	0.880794	0.460355	0.0696151	[3, 1]	3.16228	40
668	0.328973	0.671027	1	0.862343	0.465608	0.0184507	[4, 1]	4.12311	40
669	0.329056	0.670944	1	0.855572	0.536613	0.00677057	[5, 1]	5.09902	40
670	0.329569	0.670431	1	0.814069	0.49625	0.0415031	[5, 2]	5.38516	40
671	0.330399	0.669601	1	0.746819	0.0672506	0.0672506	[4, 2]	4.47214	40
672	0.330734	0.669266	1	0.719702	0.801726	0.027117	[3, 3]	4.24264	40
673	0.33077	0.66923	1	0.716761	0.670645	0.00294097	[4, 3]	5	40
674	0.330902	0.669098	1	0.706044	0.812443	0.0107171	[3, 3]	4.24264	40
675	0.332385	0.667615	1	0.58595	0.120094	0.120094	[3, 2]	3.60555	40
676	0.332674	0.667326	1	0.562518	0.328042	0.0234322	[2, 2]	2.82843	40
677	0.335676	0.664324	1	0.319393	0.571167	0.243125	[2, 2]	2.82843	40
678	0.336265	0.663735	1	0.271683	0.12856	0.0477098	[2, 1]	2.23607	40
679	0.336743	0.663257	1	0.232962	0.244279	0.0387216	[1, 0]	1	40
680	0.33698	0.66302	1	0.2137	0.263541	0.0192614	[1, 0]	1	40
681	0.338182	0.661818	1	0.116364	0.148252	0.0973361	[2, 0]	2	40
682	0.339619	0.660381	1	0	0.379905	0.116364	[1, 0]	1	40
687	0.339879	0.660121	1	0.978909	0.489667	0.0210909	[2, 1]	2.23607	41
688	0.340312	0.659688	1	0.943857	0.685637	0.0350519	[1, 0]	1	41
689	0.342174	0.657826	1	0.793058	0.640467	0.1508	[2, 1]	2.23607	41
690	0.342196	0.657804	1	0.791232	0.687463	0.00182541	[1, 0]	1	41
691	0.342779	0.657221	1	0.743998	0.687701	0.0472343	[2, 1]	2.23607	41
692	0.346515	0.653485	1	0.441433	0.782685	0.302565	[2, 2]	2.82843	41
693	0.347327	0.652673	1	0.375597	0.84852	0.0658353	[2, 2]	2.82843	41
694	0.347909	0.652091	1	0.328505	0.426998	0.0470927	[1, 2]	2.23607	41
695	0.348248	0.651752	1	0.301026	0.559123	0.0274787	[2, 3]	3.60555	41
696	0.348425	0.651575	1	0.286676	0.391701	0.0143503	[1, 4]	4.12311	41
697	0.348688	0.651312	1	0.265351	0.69197	0.0213243	[1, 3]	3.16228	41
698	0.35138	0.64862	1	0.0473242	0.218027	0.218027	[1, 1]	1.41421	41
699	0.351519	0.648481	1	0.0361061	0.229245	0.011218	[1, 1]	1.41421	41
704	0.351695	0.648305	1	0.985691	0.496906	0.0143085	[2, 1]	2.23607	43
705	0.352576	0.647424	1	0.914391	0.56755	0.0713006	[1, 2]	2.23607	43
706	0.353717	0.646283	1	0.821897	0.660044	0.0924935	[1, 2]	2.23607	43
707	0.353841	0.646159	1	0.811881	0.701986	0.0100162	[1, 3]	3.16228	43
708	0.353842	0.646158	1	0.81178	0.702088	0.000101541	[1, 3]	3.16228	43
709	0.354363	0.645637	1	0.769605	0.729637	0.0421745	[2, 4]	4.47214	43
710	0.355021	0.644979	1	0.716342	0.0532631	0.0532631	[1, 4]	4.12311	43
711	0.356888	0.643112	1	0.565109	0.380479	0.151233	[1, 5]	5.09902	43
712	0.358354	0.641646	1	0.446337	0.300468	0.118772	[2, 5]	5.38516	43
713	0.358767	0.641233	1	0.412851	0.333954	0.0334853	[2, 5]	5.38516	43
714	0.359291	0.640709	1	0.370412	0.772077	0.0424396	[2, 4]	4.47214	43
715	0.360262	0.639738	1	0.291777	0.459113	0.0786347	[1, 5]	5.09902	43
716	0.362941	0.637059	1	0.074784	0.550947	0.216993	[2, 5]	5.38516	43
717	0.36332	0.63668	1	0.0441136	0.489784	0.0306704	[1, 5]	5.09902	43
718	0.363864	0.636136	1	0	0.236752	0.0441136	[1, 7]	7.07107	43
745	0.37032	0.62968	1	0.477122	0.522878	0.522878	[2, 0]	2	45
746	0.371308	0.628692	1	0.397063	0.631006	0.080059	[2, 1]	2.23607	45
747	0.371376	0.628624	1	0.391534	0.469914	0.0055284	[3, 0]	3	45
748	0.372114	0.627886	1	0.331804	0.529645	0.0597306	[3, 0]	3	45
749	0.372255	0.627745	1	0.320329	0.896526	0.0114743	[4, 0]	4	45
750	0.372736	0.627264	1	0.281373	0.224497	0.0389562	[3, 1]	3.16228	45
751	0.372829	0.627171	1	0.273839	0.904061	0.00753455	[4, 0]	4	45
752	0.372946	0.627054	1	0.264368	0.913531	0.00947063	[4, 0]	4	45
753	0.373834	0.626166	1	0.192471	0.601541	0.0718965	[3, 0]	3	45
754	0.373908	0.626092	1	0.186433	0.577206	0.0060388	[1, 0]	1	45
755	0.374228	0.625772	1	0.160522	0.603117	0.0259111	[1, 0]	1	45
756	0.374304	0.625696	1	0.154408	0.609231	0.00611399	[1, 0]	1	45
759	0.376396	0.623604	1	0.830543	0.659241	0.169457	[2, 0]	2	46
760	0.37705	0.62295	1	0.777565	0.662209	0.0529783	[1, 0]	1	46
761	0.378717	0.621283	1	0.642504	0.63508	0.135061	[3, 0]	3	46
762	0.380074	0.619926	1	0.532572	0.607623	0.109931	[3, 1]	3.16228	46
763	0.38052	0.61948	1	0.496465	0.695348	0.0361071	[2, 0]	2	46
764	0.381245	0.618755	1	0.437768	0.66632	0.0586973	[3, 1]	3.16228	46
765	0.381886	0.618114	1	0.385832	0.653477	0.0519358	[3, 2]	3.60555	46
766	0.382425	0.617575	1	0.342159	0.0962588	0.0436737	[2, 3]	3.60555	46
767	0.386573	0.613427	1	0.00620484	0.432213	0.335954	[2, 3]	3.60555	46
768	0.386649	0.613351	1	0	0.529083	0.00620484	[1, 4]	4.12311	46
795	0.386917	0.613083	1	0.978348	0.141746	0.021652	[2, 0]	2	47
796	0.387445	0.612555	1	0.935598	0.349522	0.0427496	[1, 1]	1.41421	47
799	0.387638	0.612362	1	0.984349	0.864171	0.0156514	[2, 0]	2	48
800	0.387861	0.612139	1	0.966227	0.680331	0.0181214	[1, 0]	1	48
801	0.388513	0.611487	1	0.913472	0.733086	0.0527552	[1, 0]	1	48
802	0.388592	0.611408	1	0.907037	0.739521	0.00643505	[1, 0]	1	48
803	0.388943	0.611057	1	0.878649	0.892559	0.0283881	[2, 0]	2	48
804	0.390605	0.609395	1	0.744007	0.693765	0.134642	[3, 0]	3	48
805	0.39073	0.60927	1	0.733842	0.70393	0.0101645	[3, 0]	3	48
806	0.391187	0.608813	1	0.696846	0.776517	0.0369966	[1, 0]	1	48
807	0.391321	0.608679	1	0.686013	0.78735	0.0108327	[1, 0]	1	48
808	0.391337	0.608663	1	0.684718	0.813738	0.0012949	[1, 1]	1.41421	48
809	0.391353	0.608647	1	0.683427	0.788641	0.00129047	[1, 0]	1	48
810	0.391684	0.608316	1	0.656573	0.815495	0.0268541	[1, 0]	1	48
811	0.391724	0.608276	1	0.653375	0.895758	0.00319885	[2, 0]	2	48
812	0.392642	0.607358	1	0.579018	0.778286	0.0743563	[3, 0]	3	48
813	0.393344	0.606656	1	0.52213	0.943487	0.0568878	[3, 1]	3.16228	48
814	0.393874	0.606126	1	0.479239	0.103442	0.0428916	[4, 0]	4	48
815	0.398453	0.601547	1	0.108299	0.474381	0.37094	[4, 0]	4	48
816	0.398566	0.601434	1	0.0991784	0.787407	0.00912091	[3, 0]	3	48
817	0.398719	0.601281	1	0.0867336	0.799852	0.0124448	[3, 0]	3	48
818	0.399747	0.600253	1	0.00352458	0.898704	0.083209	[1, 0]	1	48
819	0.39979	0.60021	1	0	0.817263	0.00352458	[1, 1]	1.41421	48
829	0.399855	0.600145	1	0.994785	0.900973	0.00521487	[1, 0]	1	49
830	0.399963	0.600037	1	0.98601	0.0620387	0.00877559	[2, 1]	2.23607	49
831	0.40004	0.59996	1	0.979789	0.954866	0.00622081	[2, 2]	2.82843	49
832	0.400765	0.599235	1	0.921004	0.718829	0.0587851	[1, 2]	2.23607	49
833	0.404853	0.595147	1	0.589894	0.33111	0.33111	[2, 3]	3.60555	49
834	0.405204	0.594796	1	0.561459	0.655476	0.0284347	[3, 3]	4.24264	49
835	0.405595	0.594405	1	0.529796	0.541165	0.0316624	[4, 2]	4.47214	49
836	0.406764	0.593236	1	0.435087	0.487748	0.094709	[5, 2]	5.38516	49
837	0.40732	0.59268	1	0.390084	0.519384	0.045003	[4, 1]	4.12311	49
838	0.407775	0.592225	1	0.353207	0.463875	0.0368774	[3, 0]	3	49
839	0.409753	0.590247	1	0.192997	0.222249	0.16021	[2, 1]	2.23607	49
840	0.409822	0.590178	1	0.187399	0.15385	0.00559816	[2, 0]	2	49
841	0.412136	0.587864	1	0	0.341249	0.187399	[2, 0]	2	49
850	0.413886	0.586114	1	0.858275	0.202188	0.141725	[1, 0]	1	50
855	0.414094	0.585906	1	0.983132	0.322554	0.0168679	[2, 0]	2	52
856	0.41564	0.58436	1	0.857887	0.347493	0.125245	[2, 1]	2.23607	52
857	0.415812	0.584188	1	0.843936	0.644957	0.0139517	[3, 1]	3.16228	52
858	0.420191	0.579809	1	0.489291	0.702138	0.354645	[2, 1]	2.23607	52
859	0.42125	0.57875	1	0.403444	0.518059	0.0858465	[2, 2]	2.82843	52
860	0.422491	0.577509	1	0.302985	0.629542	0.100459	[1, 3]	3.16228	52
861	0.42297	0.57703	1	0.264139	0.556906	0.0388465	[2, 2]	2.82843	52
862	0.423556	0.576444	1	0.216713	0.308963	0.0474264	[2, 3]	3.60555	52
863	0.424005	0.575995	1	0.180342	0.593276	0.0363708	[2, 2]	2.82843	52
864	0.424226	0.575774	1	0.162434	0.611184	0.0179077	[2, 2]	2.82843	52
865	0.424414	0.575586	1	0.147204	0.717368	0.01523	[2, 1]	2.23607	52
866	0.426128	0.573872	1	0.00833919	0.856233	0.138865	[2, 1]	2.23607	52
867	0.426192	0.573808	1	0.00320579	0.616317	0.00513341	[2, 2]	2.82843	52
868	0.426231	0.573769	1	0	0.163402	0.00320579	[3, 3]	4.24264	52
875	0.426751	0.573249	1	0.957899	0.364655	0.042101	[2, 0]	2	53
876	0.427289	0.572711	1	0.914332	0.688525	0.0435673	[1, 1]	1.41421	53
877	0.427339	0.572661	1	0.910273	0.692583	0.00405836	[1, 1]	1.41421	53
878	0.428184	0.571816	1	0.841852	0.840498	0.0684214	[1, 0]	1	53
879	0.428227	0.571773	1	0.83834	0.84401	0.00351171	[1, 0]	1	53
880	0.428881	0.571119	1	0.78536	0.89699	0.0529797	[1, 0]	1	53
881	0.42892	0.57108	1	0.78222	0.90013	0.00314043	[1, 0]	1	53
882	0.429023	0.570977	1	0.773849	0.908502	0.00837129	[1, 0]	1	53
883	0.429113	0.570887	1	0.766559	0.699872	0.00728951	[1, 1]	1.41421	53
884	0.430471	0.569529	1	0.656571	0.509905	0.109988	[2, 2]	2.82843	53
885	0.430772	0.569228	1	0.632199	0.677849	0.0243719	[3, 2]	3.60555	53
886	0.433529	0.566471	1	0.408912	0.682032	0.223287	[4, 3]	5	53
887	0.43549	0.56451	1	0.250045	0.322269	0.158867	[3, 3]	4.24264	53
888	0.435681	0.564319	1	0.234549	0.5254	0.0154957	[2, 2]	2.82843	53
889	0.435733	0.564267	1	0.230373	0.206364	0.00417654	[1, 2]	2.23607	53
890	0.437393	0.562607	1	0.0959187	0.340819	0.134454	[1, 2]	2.23607	53
891	0.438577	0.561423	1	0	0.436737	0.0959187	[1, 2]	2.23607	53
897	0.439213	0.560787	1	0.94846	0.528862	0.0515398	[2, 0]	2	55
898	0.440671	0.559329	1	0.830405	0.652856	0.118055	[1, 0]	1	55
899	0.442438	0.557562	1	0.687267	0.830839	0.143138	[2, 1]	2.23607	55
900	0.442443	0.557557	1	0.686887	0.529242	0.0003798	[2, 0]	2	55
901	0.443064	0.556936	1	0.636545	0.381452	0.0503422	[3, 1]	3.16228	55
902	0.443633	0.556367	1	0.590426	0.368387	0.0461189	[4, 1]	4.12311	55
903	0.445103	0.554897	1	0.471396	0.754111	0.119031	[5, 1]	5.09902	55
904	0.445375	0.554625	1	0.449394	0.675414	0.0220015	[6, 2]	6.32456	55
905	0.445686	0.554314	1	0.42418	0.779325	0.0252137	[5, 1]	5.09902	55
906	0.447045	0.552955	1	0.314051	0.478517	0.110129	[4, 1]	4.12311	55
907	0.447127	0.552873	1	0.307463	0.755253	0.00658797	[4, 2]	4.47214	55
908	0.448713	0.551287	1	0.178988	0.274983	0.128475	[4, 3]	5	55
909	0.448838	0.551162	1	0.168813	0.0509811	0.0101747	[3, 4]	5	55
910	0.450923	0.549077	1	0	0.39331	0.168813	[2, 3]	3.60555	55
930	0.4516	0.5484	1	0.945152	0.800791	0.0548475	[1, 1]	1.41421	56
933	0.453095	0.546905	1	0.878922	0.172059	0.121078	[1, 0]	1	57
934	0.454174	0.545826	1	0.791483	0.436688	0.0874395	[2, 1]	2.23607	57
935	0.454441	0.545559	1	0.76982	0.920367	0.0216629	[3, 2]	3.60555	57
936	0.455244	0.544756	1	0.704811	0.747041	0.0650085	[4, 2]	4.47214	57
937	0.45716	0.54284	1	0.54965	0.44648	0.155161	[5, 2]	5.38516	57
938	0.458764	0.541236	1	0.419664	0.434153	0.129986	[5, 3]	5.83095	57
939	0.461299	0.538701	1	0.214346	0.272568	0.205318	[4, 3]	5	57
940	0.463945	0.536055	1	0	0.486915	0.214346	[4, 3]	5	57
960	0.464734	0.535266	1	0.93613	0.118764	0.0638697	[2, 1]	2.23607	58
961	0.465133	0.534867	1	0.903769	0.424062	0.0323612	[1, 1]	1.41421	58
962	0.466813	0.533187	1	0.767716	0.560115	0.136053	[1, 1]	1.41421	58
963	0.467605	0.532395	1	0.703568	0.182912	0.064148	[2, 1]	2.23607	58
964	0.467989	0.532011	1	0.67247	0.932071	0.0310981	[2, 0]	2	58
965	0.468009	0.531991	1	0.670829	0.933711	0.00164029	[2, 0]	2	58
966	0.468089	0.531911	1	0.664374	0.725284	0.00645543	[1, 0]	1	58
967	0.468267	0.531733	1	0.649927	0.948158	0.0144464	[2, 0]	2	58
968	0.468594	0.531406	1	0.623453	0.430858	0.0264748	[3, 0]	3	58
969	0.468645	0.531355	1	0.619366	0.340076	0.00408615	[3, 1]	3.16228	58
970	0.469046	0.530954	1	0.586833	0.0881984	0.032533	[4, 2]	4.47214	58
971	0.469809	0.530191	1	0.525081	0.508233	0.0617528	[3, 2]	3.60555	58
972	0.470739	0.529261	1	0.449694	0.258298	0.0753865	[2, 1]	2.23607	58
973	0.470767	0.529233	1	0.447432	0.95042	0.00226236	[2, 0]	2	58
974	0.471093	0.528907	1	0.421078	0.751638	0.0263532	[1, 0]	1	58
977	0.471243	0.528757	1	0.987855	0.270444	0.0121454	[1, 1]	1.41421	59
978	0.471625	0.528375	1	0.956914	0.644513	0.0309405	[2, 1]	2.23607	59
979	0.472786	0.527214	1	0.862864	0.434126	0.0940503	[3, 1]	3.16228	59
980	0.473818	0.526182	1	0.779209	0.476965	0.0836545	[2, 0]	2	59
981	0.476456	0.523544	1	0.565582	0.690592	0.213627	[2, 0]	2	59
982	0.476752	0.523248	1	0.541574	0.775646	0.0240083	[3, 0]	3	59
983	0.476761	0.523239	1	0.540851	0.776369	0.000723479	[3, 0]	3	59
984	0.477264	0.522736	1	0.500079	0.696248	0.0407717	[5, 0]	5	59
985	0.477966	0.522034	1	0.443223	0.812109	0.056856	[4, 0]	4	59
986	0.479256	0.520744	1	0.338758	0.795057	0.104465	[2, 0]	2	59
987	0.479738	0.520262	1	0.299712	0.815415	0.0390455	[3, 0]	3	59
988	0.480099	0.519901	1	0.270508	0.824261	0.0292037	[2, 0]	2	59
989	0.481095	0.518905	1	0.189773	0.904996	0.0807352	[2, 0]	2	59
990	0.482217	0.517783	1	0.0989028	0.361314	0.0908705	[1, 1]	1.41421	59
993	0.484076	0.515924	1	0.849411	0.637504	0.150589	[2, 0]	2	60
994	0.485385	0.514615	1	0.743432	0.743483	0.105979	[2, 0]	2	60
995	0.486092	0.513908	1	0.686156	0.752624	0.0572759	[2, 1]	2.23607	60
996	0.486115	0.513885	1	0.684294	0.915393	0.00186171	[2, 2]	2.82843	60
997	0.48988	0.51012	1	0.379335	0.304959	0.304959	[2, 3]	3.60555	60
998	0.491244	0.508756	1	0.268834	0.41546	0.110501	[2, 3]	3.60555	60
999	0.493022	0.506978	1	0.124798	0.452999	0.144036	[1, 3]	3.16228	60
1000	0.493683	0.506317	1	0.0712876	0.645634	0.0535099	[1, 2]	2.23607	60
1001	0.494563	0.505437	1	0	0.37197	0.0712876	[1, 1]	1.41421	60
1004	0.494905	0.505095	1	0.972322	0.807002	0.0276778	[2, 1]	2.23607	61
1005	0.495267	0.504733	1	0.94296	0.772845	0.0293621	[2, 2]	2.82843	61
1006	0.495367	0.504633	1	0.934866	0.923487	0.00809383	[3, 2]	3.60555	61
1007	0.495899	0.504101	1	0.891765	0.659418	0.0431009	[3, 3]	4.24264	61
1008	0.496128	0.503872	1	0.873228	0.791383	0.0185377	[2, 2]	2.82843	61
1009	0.496137	0.503863	1	0.872513	0.90571	0.000714355	[2, 3]	3.60555	61
1010	0.49633	0.50367	1	0.856906	0.281118	0.0156077	[1, 4]	4.12311	61
1011	0.497534	0.502466	1	0.759325	0.22614	0.0975801	[2, 4]	4.47214	61
1012	0.498894	0.501106	1	0.649206	0.940959	0.11012	[3, 5]	5.83095	61
1013	0.498952	0.501048	1	0.644505	0.94566	0.00470067	[3, 5]	5.83095	61
1014	0.499624	0.500376	1	0.59005	0.426424	0.0544549	[2, 5]	5.38516	61
1015	0.501189	0.498811	1	0.463253	0.352937	0.126797	[2, 4]	4.47214	61
1016	0.501365	0.498635	1	0.449003	0.829665	0.0142504	[3, 4]	5	61
1017	0.501583	0.498417	1	0.431409	0.923304	0.0175941	[2, 3]	3.60555	61
1018	0.501677	0.498323	1	0.423795	0.718078	0.0076134	[1, 3]	3.16228	61
1019	0.501787	0.498213	1	0.414828	0.169254	0.00896769	[1, 1]	1.41421	61
1020	0.502461	0.497539	1	0.360266	0.591174	0.0545615	[1, 0]	1	61
1021	0.502891	0.497109	1	0.325416	0.626024	0.0348495	[1, 0]	1	61
1024	0.503226	0.496774	1	0.972912	0.950393	0.0270884	[2, 0]	2	62
1025	0.504699	0.495301	1	0.853559	0.82144	0.119353	[4, 0]	4	62
1026	0.50486	0.49514	1	0.84053	0.834469	0.0130292	[4, 0]	4	62
1027	0.504914	0.495086	1	0.836181	0.464704	0.00434818	[5, 1]	5.09902	62
1028	0.506413	0.493587	1	0.71471	0.502924	0.121471	[4, 2]	4.47214	62
1029	0.506762	0.493238	1	0.686488	0.197476	0.028222	[3, 1]	3.16228	62
1030	0.510333	0.489667	1	0.397219	0.723422	0.289269	[3, 2]	3.60555	62
1031	0.510781	0.489219	1	0.360915	0.23378	0.0363036	[3, 1]	3.16228	62
1032	0.511283	0.488717	1	0.32029	0.467049	0.040625	[2, 1]	2.23607	62
1033	0.51133	0.48867	1	0.316415	0.954268	0.00387487	[2, 0]	2	62
1034	0.511518	0.488482	1	0.301186	0.969497	0.0152292	[2, 0]	2	62
1035	0.51169	0.48831	1	0.287283	0.848373	0.0139036	[4, 0]	4	62
1036	0.513084	0.486916	1	0.174349	0.565933	0.112934	[5, 0]	5	62
1037	0.513439	0.486561	1	0.14564	0.594642	0.0287087	[5, 0]	5	62
1038	0.513635	0.486365	1	0.12977	0.864243	0.0158699	[4, 0]	4	62
1039	0.51383	0.48617	1	0.113927	0.880086	0.0158428	[4, 0]	4	62
1040	0.514231	0.485769	1	0.0814512	0.912562	0.0324758	[4, 0]	4	62
1041	0.515237	0.484763	1	0	0.315231	0.0814512	[3, 1]	3.16228	62
1051	0.518335	0.481665	1	0.749072	0.392674	0.250928	[2, 0]	2	65
1052	0.518509	0.481491	1	0.734964	0.760486	0.0141073	[1, 0]	1	65
1055	0.519288	0.480712	1	0.936909	0.139725	0.0630912	[1, 2]	2.23607	66
1056	0.519431	0.480569	1	0.925341	0.823678	0.0115681	[1, 3]	3.16228	66
1057	0.519988	0.480012	1	0.880155	0.184911	0.0451856	[1, 2]	2.23607	66
1058	0.520347	0.479653	1	0.851147	0.852686	0.0290079	[1, 3]	3.16228	66
1059	0.522084	0.477916	1	0.710382	0.666165	0.140765	[1, 4]	4.12311	66
1060	0.5222	0.4778	1	0.70102	0.862047	0.00936181	[1, 3]	3.16228	66
1061	0.52297	0.47703	1	0.63866	0.706873	0.0623601	[2, 2]	2.82843	66
1062	0.52305	0.47695	1	0.632155	0.421966	0.00650537	[2, 1]	2.23607	66
1063	0.523093	0.476907	1	0.628712	0.859676	0.00344259	[1, 0]	1	66
1064	0.524255	0.475745	1	0.534593	0.260902	0.0941195	[1, 1]	1.41421	66
1067	0.525181	0.474819	1	0.924958	0.727899	0.0750424	[2, 1]	2.23607	67
1068	0.525934	0.474066	1	0.863994	0.197086	0.0609633	[2, 2]	2.82843	67
1069	0.528537	0.471463	1	0.653159	0.210836	0.210836	[3, 1]	3.16228	67
1070	0.528993	0.471007	1	0.616228	0.949492	0.0369302	[4, 2]	4.47214	67
1071	0.53057	0.46943	1	0.488419	0.402793	0.127809	[5, 1]	5.09902	67
1072	0.530741	0.469259	1	0.474596	0.0138227	0.0138227	[4, 0]	4	67
1073	0.532942	0.467058	1	0.296304	0.531681	0.178293	[5, 0]	5	67
1074	0.533041	0.466959	1	0.288287	0.815019	0.00801675	[4, 1]	4.12311	67
1075	0.53362	0.46638	1	0.241376	0.588075	0.0469108	[5, 2]	5.38516	67
1076	0.534681	0.465319	1	0.155492	0.573632	0.0858837	[6, 3]	6.7082	67
1077	0.534681	0.465319	1	0.155446	0.859722	4.62011e-05	[5, 3]	5.83095	67
1078	0.536597	0.463403	1	0.000296642	0.228638	0.15515	[4, 4]	5.65685	67
1079	0.5366	0.4634	1	0	0.723718	0.000296642	[3, 4]	5	67
1091	0.536748	0.463252	1	0.988043	0.293075	0.0119566	[2, 0]	2	68
1092	0.538264	0.461736	1	0.865208	0.553693	0.122835	[3, 0]	3	68
1093	0.539553	0.460447	1	0.760791	0.397491	0.104417	[2, 0]	2	68
1094	0.539925	0.460075	1	0.730718	0.561755	0.0300738	[1, 0]	1	68
1095	0.539989	0.460011	1	0.725519	0.40269	0.00519853	[2, 0]	2	68
1096	0.541349	0.458651	1	0.615394	0.67188	0.110126	[1, 0]	1	68
1097	0.541611	0.458389	1	0.594099	0.423984	0.0212944	[2, 0]	2	68
1098	0.542173	0.457827	1	0.548648	0.469435	0.0454512	[2, 0]	2	68
1099	0.543469	0.456531	1	0.443665	0.658676	0.104983	[3, 0]	3	68
1100	0.545341	0.454659	1	0.292039	0.621061	0.151626	[2, 0]	2	68
1101	0.545884	0.454116	1	0.248046	0.715874	0.0439934	[1, 0]	1	68
1102	0.547054	0.452946	1	0.153245	0.753476	0.0948005	[3, 0]	3	68
1103	0.547406	0.452594	1	0.124751	0.257133	0.0284947	[4, 0]	4	68
1104	0.548098	0.451902	1	0.0686879	0.809539	0.0560626	[3, 0]	3	68
1105	0.548946	0.451054	1	0	0.325821	0.0686879	[4, 0]	4	68
1135	0.550609	0.449391	1	0.865282	0.722793	0.134718	[2, 0]	2	69
1136	0.556869	0.443131	1	0.358201	0.868396	0.507081	[3, 0]	3	69
1137	0.557169	0.442831	1	0.333915	0.824137	0.0242856	[1, 0]	1	69
1140	0.557249	0.442751	1	0.9935	0.753541	0.00650033	[2, 1]	2.23607	70
1141	0.557322	0.442678	1	0.987621	0.75942	0.00587864	[2, 1]	2.23607	70
1142	0.557374	0.442626	1	0.983432	0.763609	0.00418943	[2, 1]	2.23607	70
1143	0.560986	0.439014	1	0.690826	0.292606	0.292606	[3, 2]	3.60555	70
1144	0.561638	0.438362	1	0.638051	0.914822	0.0527747	[2, 2]	2.82843	70
1145	0.561682	0.438318	1	0.634497	0.42552	0.00355417	[3, 1]	3.16228	70
1146	0.562505	0.437495	1	0.567843	0.492173	0.0666535	[3, 1]	3.16228	70
1147	0.562924	0.437076	1	0.53385	0.607626	0.0339935	[2, 0]	2	70
1148	0.56379	0.43621	1	0.463689	0.677786	0.0701602	[2, 0]	2	70
1149	0.564278	0.435722	1	0.424193	0.717282	0.039496	[2, 0]	2	70
1150	0.564652	0.435348	1	0.3939	0.747575	0.030293	[2, 0]	2	70
1151	0.565133	0.434867	1	0.354921	0.761773	0.0389797	[1, 0]	1	70
1154	0.565526	0.434474	1	0.968185	0.468552	0.0318148	[1, 0]	1	71
1155	0.565818	0.434182	1	0.944561	0.838643	0.0236243	[2, 1]	2.23607	71
1156	0.565879	0.434121	1	0.939557	0.919826	0.00500436	[2, 2]	2.82843	71
1157	0.565964	0.434036	1	0.932677	0.956371	0.00687909	[1, 1]	1.41421	71
1158	0.566077	0.433923	1	0.923579	0.847742	0.00909829	[2, 1]	2.23607	71
1159	0.566584	0.433416	1	0.882509	0.960896	0.0410701	[2, 2]	2.82843	71
1160	0.566607	0.433393	1	0.880656	0.661271	0.00185262	[3, 1]	3.16228	71
1161	0.566873	0.433127	1	0.859078	0.682849	0.0215781	[3, 1]	3.16228	71
1162	0.567512	0.432488	1	0.807316	0.899504	0.0517626	[2, 1]	2.23607	71
1163	0.567737	0.432263	1	0.789055	0.70111	0.0182609	[3, 1]	3.16228	71
1164	0.567805	0.432195	1	0.783619	0.90494	0.00543571	[2, 1]	2.23607	71
1165	0.567837	0.432163	1	0.781005	0.907554	0.00261401	[2, 1]	2.23607	71
1166	0.567993	0.432007	1	0.768368	0.973534	0.0126373	[2, 2]	2.82843	71
1167	0.568108	0.431892	1	0.759005	0.737261	0.00936242	[2, 3]	3.60555	71
1168	0.568146	0.431854	1	0.755995	0.976544	0.00301037	[2, 2]	2.82843	71
1169	0.568152	0.431848	1	0.755474	0.696769	0.000520761	[3, 2]	3.60555	71
1170	0.568214	0.431786	1	0.750416	0.981602	0.00505796	[2, 2]	2.82843	71
1171	0.568412	0.431588	1	0.734426	0.712759	0.01599	[3, 2]	3.60555	71
1172	0.568413	0.431587	1	0.734344	0.981684	8.20721e-05	[2, 2]	2.82843	71
1173	0.568775	0.431225	1	0.705042	0.830093	0.0293022	[1, 3]	3.16228	71
1174	0.569165	0.430835	1	0.67339	0.591767	0.0316519	[1, 4]	4.12311	71
1175	0.569408	0.430592	1	0.653762	0.511802	0.0196282	[1, 5]	5.09902	71
1176	0.570243	0.429757	1	0.586138	0.531499	0.0676236	[1, 6]	6.08276	71
1177	0.570371	0.429629	1	0.575714	0.87882	0.0104241	[1, 7]	7.07107	71
1178	0.572784	0.427216	1	0.380277	0.204049	0.195437	[2, 8]	8.24621	71
1179	0.574549	0.425451	1	0.237282	0.347044	0.142995	[2, 8]	8.24621	71
1180	0.574894	0.425106	1	0.209391	0.374936	0.0278919	[2, 8]	8.24621	71
1181	0.574936	0.425064	1	0.205955	0.946922	0.00343539	[1, 8]	8.06226	71
1182	0.575193	0.424807	1	0.185191	0.967687	0.0207646	[1, 8]	8.06226	71
1183	0.575226	0.424774	1	0.182496	0.534193	0.00269465	[1, 6]	6.08276	71
1184	0.575353	0.424647	1	0.172191	0.717177	0.0103047	[2, 5]	5.38516	71
1185	0.575377	0.424623	1	0.170231	0.725678	0.00195991	[3, 6]	6.7082	71
1186	0.576525	0.423475	1	0.0772236	0.810185	0.0930077	[2, 5]	5.38516	71
1187	0.577357	0.422643	1	0.00984316	0.187378	0.0673804	[2, 4]	4.47214	71
1188	0.577479	0.422521	1	0	0.197222	0.00984316	[2, 4]	4.47214	71
1208	0.57758	0.42242	1	0.991784	0.475265	0.00821565	[1, 1]	1.41421	72
1211	0.578452	0.421548	1	0.929432	0.771678	0.0705685	[2, 0]	2	73
1212	0.578859	0.421141	1	0.896451	0.804659	0.0329808	[2, 0]	2	73
1213	0.579283	0.420717	1	0.862076	0.954741	0.0343746	[1, 0]	1	73
1214	0.579552	0.420448	1	0.840275	0.697215	0.0218014	[1, 1]	1.41421	73
1215	0.579655	0.420345	1	0.831948	0.963068	0.0083267	[1, 0]	1	73
1216	0.579675	0.420325	1	0.830338	0.727288	0.00161021	[2, 1]	2.23607	73
1217	0.581125	0.418875	1	0.712858	0.844768	0.11748	[2, 1]	2.23607	73
1218	0.581131	0.418869	1	0.712414	0.955309	0.00044366	[3, 0]	3	73
1219	0.581347	0.418653	1	0.694883	0.972841	0.0175316	[3, 0]	3	73
1220	0.583555	0.416445	1	0.516068	0.520063	0.178815	[4, 0]	4	73
1221	0.583626	0.416374	1	0.510323	0.978586	0.00574556	[3, 0]	3	73
1222	0.583832	0.416168	1	0.493628	0.536758	0.0166948	[4, 0]	4	73
1223	0.585488	0.414512	1	0.359498	0.670888	0.13413	[4, 0]	4	73
1224	0.58554	0.41446	1	0.355284	0.9828	0.00421355	[3, 0]	3	73
1225	0.587431	0.412569	1	0.202118	0.824055	0.153167	[4, 0]	4	73
1226	0.587708	0.412292	1	0.179679	0.846494	0.022439	[4, 0]	4	73
1227	0.588185	0.411815	1	0.141016	0.848202	0.0386629	[5, 0]	5	73
1228	0.58975	0.41025	1	0.0142454	0.646154	0.12677	[4, 1]	4.12311	73
1229	0.589926	0.410074	1	0	0.680566	0.0142454	[3, 1]	3.16228	73
1233	0.590375	0.409625	1	0.963608	0.385914	0.0363924	[2, 0]	2	74
1234	0.59087	0.40913	1	0.923533	0.739948	0.0400751	[2, 1]	2.23607	74
1235	0.593439	0.406561	1	0.715425	0.905323	0.208108	[1, 0]	1	74
1236	0.593766	0.406234	1	0.68894	0.766432	0.0264845	[2, 1]	2.23607	74
1237	0.594577	0.405423	1	0.623248	0.358298	0.0656924	[2, 2]	2.82843	74
1238	0.59541	0.40459	1	0.555776	0.432127	0.0674722	[3, 1]	3.16228	74
1239	0.595417	0.404583	1	0.555193	0.983382	0.000582434	[3, 2]	3.60555	74
1240	0.596264	0.403736	1	0.486656	0.426835	0.068537	[2, 2]	2.82843	74
1241	0.596539	0.403461	1	0.464347	0.449145	0.0223092	[2, 2]	2.82843	74
1242	0.596749	0.403251	1	0.447339	0.449135	0.0170081	[3, 1]	3.16228	74
1243	0.598028	0.401972	1	0.34376	0.191777	0.103579	[4, 0]	4	74
1244	0.5987	0.4013	1	0.289325	0.246213	0.0544356	[4, 0]	4	74
1245	0.598981	0.401019	1	0.266551	0.498039	0.0227737	[5, 0]	5	74
1246	0.602272	0.397728	1	0	0.512764	0.266551	[4, 0]	4	74
1257	0.602373	0.397627	1	0.991759	0.971309	0.00824133	[1, 1]	1.41421	77
1258	0.602429	0.397571	1	0.987234	0.682373	0.00452423	[2, 1]	2.23607	77
1259	0.602626	0.397374	1	0.971325	0.661544	0.0159099	[3, 0]	3	77
1260	0.603363	0.396637	1	0.911623	0.412639	0.0597016	[2, 0]	2	77
1261	0.604043	0.395957	1	0.856529	0.589288	0.0550942	[3, 1]	3.16228	77
1262	0.604898	0.395102	1	0.787274	0.241314	0.0692551	[3, 2]	3.60555	77
1263	0.605066	0.394934	1	0.773665	0.694174	0.0136083	[4, 3]	5	77
1264	0.605307	0.394693	1	0.754164	0.522425	0.0195014	[5, 2]	5.38516	77
1265	0.60534	0.39466	1	0.751452	0.696886	0.00271192	[4, 3]	5	77
1266	0.6092	0.3908	1	0.438794	0.791175	0.312658	[5, 4]	6.40312	77
1267	0.612112	0.387888	1	0.202959	0.765077	0.235836	[4, 5]	6.40312	77
1268	0.612409	0.387591	1	0.178861	0.815273	0.024098	[5, 4]	6.40312	77
1269	0.61255	0.38745	1	0.167425	0.841528	0.0114351	[4, 4]	5.65685	77
1270	0.612868	0.387132	1	0.141696	0.867257	0.0257295	[4, 4]	5.65685	77
1271	0.613239	0.386761	1	0.11167	0.528065	0.0300258	[3, 3]	4.24264	77
1272	0.614617	0.385383	1	0	0.352984	0.11167	[3, 2]	3.60555	77
1309	0.615281	0.384719	1	0.946203	0.379617	0.0537966	[1, 1]	1.41421	78
1310	0.615545	0.384455	1	0.924849	0.781841	0.0213547	[2, 2]	2.82843	78
1311	0.617083	0.382917	1	0.80026	0.806962	0.124589	[2, 1]	2.23607	78
1312	0.617676	0.382324	1	0.752287	0.795547	0.0479723	[1, 2]	2.23607	78
1313	0.61781	0.38219	1	0.741415	0.806419	0.010872	[1, 2]	2.23607	78
1314	0.618047	0.381953	1	0.722173	0.801083	0.0192419	[2, 2]	2.82843	78
1315	0.619057	0.380943	1	0.640352	0.702883	0.0818218	[3, 2]	3.60555	78
1316	0.619176	0.380824	1	0.630721	0.816593	0.00963078	[2, 1]	2.23607	78
1317	0.619204	0.380796	1	0.628508	0.803296	0.00221294	[2, 2]	2.82843	78
1318	0.619245	0.380755	1	0.625179	0.948989	0.00332905	[2, 3]	3.60555	78
1319	0.619306	0.380694	1	0.620235	0.811363	0.00494364	[1, 2]	2.23607	78
1320	0.61995	0.38005	1	0.568023	0.431829	0.0522117	[1, 1]	1.41421	78
1321	0.620139	0.379861	1	0.552721	0.731177	0.0153028	[2, 0]	2	78
1322	0.620915	0.379085	1	0.489893	0.87942	0.0628271	[2, 1]	2.23607	78
1323	0.621	0.379	1	0.482991	0.709786	0.00690263	[3, 2]	3.60555	78
1324	0.621378	0.378622	1	0.452401	0.860255	0.0305898	[4, 3]	5	78
1325	0.621471	0.378529	1	0.44483	0.975258	0.00757079	[3, 3]	4.24264	78
1326	0.621536	0.378464	1	0.439577	0.808549	0.00525308	[2, 2]	2.82843	78
1327	0.622334	0.377666	1	0.374975	0.439538	0.0646019	[3, 1]	3.16228	78
1328	0.622609	0.377391	1	0.352679	0.830846	0.0222966	[2, 2]	2.82843	78
1329	0.622615	0.377385	1	0.352229	0.831295	0.000449619	[2, 2]	2.82843	78
1330	0.622895	0.377105	1	0.329508	0.869214	0.0227206	[1, 3]	3.16228	78
1331	0.623035	0.376965	1	0.318204	0.880519	0.011304	[1, 3]	3.16228	78
1332	0.623061	0.376939	1	0.316042	0.813526	0.00216282	[1, 2]	2.23607	78
1333	0.62347	0.37653	1	0.282972	0.913588	0.0330698	[1, 3]	3.16228	78
1334	0.623752	0.376248	1	0.260123	0.936437	0.0228484	[1, 3]	3.16228	78
1335	0.624962	0.375038	1	0.162118	0.529835	0.0980055	[1, 1]	1.41421	78
1336	0.624977	0.375023	1	0.160901	0.972526	0.0012169	[1, 0]	1	78
1337	0.625098	0.374902	1	0.151031	0.933357	0.00986989	[3, 0]	3	78
1338	0.625762	0.374238	1	0.097265	0.921023	0.0537661	[4, 0]	4	78
1339	0.62577	0.37423	1	0.0966213	0.934001	0.000643692	[3, 0]	3	78
1340	0.626637	0.373363	1	0.0263772	0.822868	0.0702442	[4, 1]	4.12311	78
1341	0.626963	0.373037	1	0	0.460503	0.0263772	[5, 0]	5	78
1358	0.628691	0.371309	1	0.859996	0.337226	0.140004	[2, 1]	2.23607	79
1359	0.628692	0.371308	1	0.859953	0.972569	4.30179e-05	[1, 2]	2.23607	79
1360	0.628933	0.371067	1	0.840404	0.834821	0.0195485	[2, 3]	3.60555	79
1361	0.628965	0.371035	1	0.837837	0.471119	0.0025673	[2, 2]	2.82843	79
1362	0.630022	0.369978	1	0.75222	0.422843	0.0856166	[2, 1]	2.23607	79
1363	0.630309	0.369691	1	0.728999	0.499691	0.0232209	[3, 2]	3.60555	79
1364	0.630361	0.369639	1	0.72478	0.821482	0.00421947	[3, 1]	3.16228	79
1365	0.631158	0.368842	1	0.660228	0.535671	0.0645515	[2, 2]	2.82843	79
1366	0.631167	0.368833	1	0.659476	0.835573	0.000752154	[2, 3]	3.60555	79
1367	0.631581	0.368419	1	0.625955	0.436314	0.0335215	[2, 4]	4.47214	79
1368	0.631732	0.368268	1	0.613703	0.946253	0.0122519	[3, 4]	5	79
1369	0.634861	0.365139	1	0.360287	0.689729	0.253415	[2, 4]	4.47214	79
1370	0.634885	0.365115	1	0.358333	0.983638	0.00195403	[1, 4]	4.12311	79
1371	0.634934	0.365066	1	0.354311	0.925046	0.00402245	[1, 3]	3.16228	79
1372	0.635	0.365	1	0.34904	0.770348	0.00527043	[1, 1]	1.41421	79
1373	0.635331	0.364669	1	0.32218	0.951906	0.0268603	[1, 3]	3.16228	79
1374	0.635351	0.364649	1	0.320597	0.985222	0.00158336	[1, 4]	4.12311	79
1375	0.637269	0.362731	1	0.165229	0.75001	0.155368	[2, 5]	5.38516	79
1376	0.639309	0.360691	1	0	0.604767	0.165229	[3, 5]	5.83095	79
1412	0.639315	0.360685	1	0.999515	0.985707	0.000485111	[1, 0]	1	80
1413	0.639327	0.360673	1	0.998502	0.98672	0.001013	[1, 0]	1	80
1414	0.640647	0.359353	1	0.89162	0.838058	0.106882	[2, 0]	2	80
1415	0.641012	0.358988	1	0.862056	0.0295647	0.0295647	[3, 0]	3	80
1416	0.641128	0.358872	1	0.852644	0.678317	0.00941126	[4, 1]	4.12311	80
1417	0.641274	0.358726	1	0.840843	0.860003	0.0118011	[5, 1]	5.09902	80
1418	0.641956	0.358044	1	0.785568	0.441189	0.0552749	[6, 2]	6.32456	80
1419	0.641971	0.358029	1	0.784363	0.424048	0.00120547	[6, 1]	6.08276	80
1420	0.642213	0.357787	1	0.764755	0.879611	0.0196076	[5, 1]	5.09902	80
1421	0.642343	0.357657	1	0.754209	0.434595	0.0105468	[6, 1]	6.08276	80
1422	0.642524	0.357476	1	0.739525	0.455873	0.0146838	[6, 2]	6.32456	80
1423	0.643721	0.356279	1	0.642621	0.531499	0.0969036	[6, 1]	6.08276	80
1424	0.643775	0.356225	1	0.638198	0.953412	0.00442328	[7, 2]	7.28011	80
1425	0.645667	0.354333	1	0.484938	0.609133	0.15326	[6, 2]	6.32456	80
1426	0.646803	0.353197	1	0.392955	0.701116	0.0919832	[6, 2]	6.32456	80
1427	0.647214	0.352786	1	0.3597	0.734371	0.0332547	[6, 2]	6.32456	80
1428	0.648945	0.351055	1	0.219453	0.652049	0.140247	[5, 3]	5.83095	80
1429	0.650638	0.349362	1	0.0823593	0.726381	0.137094	[6, 4]	7.2111	80
1430	0.651079	0.348921	1	0.0466349	0.827107	0.0357244	[6, 3]	6.7082	80
1431	0.651597	0.348403	1	0.00465227	0.564408	0.0419826	[5, 2]	5.38516	80
1432	0.651654	0.348346	1	0	0.741913	0.00465227	[4, 2]	4.47214	80
1456	0.6517	0.3483	1	0.996292	0.954128	0.00370767	[2, 0]	2	81
1457	0.652115	0.347885	1	0.962699	0.878362	0.0335937	[1, 1]	1.41421	81
1458	0.65237	0.34763	1	0.942034	0.433304	0.0206649	[2, 1]	2.23607	81
1459	0.653059	0.346941	1	0.886237	0.790168	0.0557969	[1, 2]	2.23607	81
1460	0.653117	0.346883	1	0.881518	0.883081	0.00471933	[1, 1]	1.41421	81
1461	0.653588	0.346412	1	0.843377	0.828308	0.03814	[1, 2]	2.23607	81
1462	0.653837	0.346163	1	0.823216	0.84847	0.0201619	[1, 2]	2.23607	81
1463	0.654365	0.345635	1	0.780408	0.925888	0.0428072	[1, 1]	1.41421	81
1464	0.657538	0.342462	1	0.523429	0.566813	0.256979	[2, 2]	2.82843	81
1465	0.659343	0.340657	1	0.377184	0.382998	0.146246	[2, 3]	3.60555	81
1466	0.659821	0.340179	1	0.338484	0.605513	0.0386998	[2, 2]	2.82843	81
1467	0.659876	0.340124	1	0.334043	0.532505	0.00444048	[3, 1]	3.16228	81
1468	0.660011	0.339989	1	0.323091	0.0405172	0.0109525	[3, 0]	3	81
1469	0.660158	0.339842	1	0.311226	0.724624	0.0118652	[4, 0]	4	81
1470	0.660194	0.339806	1	0.308329	0.957024	0.00289663	[2, 0]	2	81
1471	0.660223	0.339777	1	0.305919	0.959435	0.0024102	[2, 0]	2	81
1472	0.661707	0.338293	1	0.18574	0.160696	0.120179	[3, 0]	3	81
1473	0.661816	0.338184	1	0.176924	0.96825	0.00881555	[2, 0]	2	81
1474	0.662543	0.337457	1	0.117989	0.219632	0.0589353	[3, 0]	3	81
1475	0.662569	0.337431	1	0.115881	0.970358	0.00210786	[2, 0]	2	81
1476	0.662579	0.337421	1	0.115144	0.971095	0.000736822	[2, 0]	2	81
1477	0.66359	0.33641	1	0.0332526	0.301523	0.0818914	[3, 0]	3	81
1478	0.663612	0.336388	1	0.0314519	0.711587	0.00180071	[5, 0]	5	81
1479	0.663694	0.336306	1	0.0247595	0.542363	0.00669243	[6, 0]	6	81
1480	0.6637	0.3363	1	0.0242995	0.542823	0.000459993	[6, 0]	6	81
1481	0.664	0.336	1	0	0.489003	0.0242995	[5, 1]	5.09902	81
1498	0.664448	0.335552	1	0.96369	0.867605	0.0363096	[2, 1]	2.23607	82
1499	0.6662	0.3338	1	0.821801	0.674394	0.141889	[3, 0]	3	82
1500	0.666258	0.333742	1	0.817133	0.977238	0.00466864	[2, 0]	2	82
1501	0.666423	0.333577	1	0.803774	0.687753	0.0133591	[3, 0]	3	82
1502	0.666556	0.333444	1	0.792961	0.870535	0.0108125	[3, 1]	3.16228	82
1503	0.666682	0.333318	1	0.782747	0.697967	0.010214	[3, 0]	3	82
1504	0.666691	0.333309	1	0.782066	0.977919	0.000681024	[2, 0]	2	82
1505	0.666801	0.333199	1	0.773096	0.986889	0.00896993	[2, 0]	2	82
1506	0.666946	0.333054	1	0.761351	0.88228	0.011745	[3, 1]	3.16228	82
1507	0.667571	0.332429	1	0.710741	0.748578	0.0506105	[3, 0]	3	82
1508	0.6677	0.3323	1	0.700315	0.892705	0.0104255	[3, 1]	3.16228	82
1509	0.669208	0.330792	1	0.578161	0.768308	0.122154	[4, 2]	4.47214	82
1510	0.66922	0.33078	1	0.577188	0.893678	0.000973305	[3, 1]	3.16228	82
1511	0.669226	0.330774	1	0.576727	0.987349	0.000460765	[2, 0]	2	82
1512	0.669235	0.330765	1	0.575944	0.988133	0.000783514	[2, 0]	2	82
1513	0.669599	0.330401	1	0.546474	0.778047	0.0294693	[3, 0]	3	82
1514	0.670235	0.329765	1	0.494972	0.861687	0.0515025	[4, 0]	4	82
1515	0.670383	0.329617	1	0.482995	0.678142	0.0119769	[5, 1]	5.09902	82
1516	0.670603	0.329397	1	0.465152	0.549341	0.0178428	[6, 1]	6.08276	82
1517	0.670712	0.329288	1	0.456372	0.772389	0.00878016	[7, 2]	7.28011	82
1518	0.670855	0.329145	1	0.44471	0.957915	0.0116624	[7, 1]	7.07107	82
1519	0.672323	0.327677	1	0.325802	0.744931	0.118908	[7, 0]	7	82
1520	0.673092	0.326908	1	0.263521	0.807212	0.0622808	[7, 0]	7	82
1521	0.673406	0.326594	1	0.238144	0.408375	0.025377	[6, 0]	6	82
1522	0.673652	0.326348	1	0.21816	0.827197	0.0199845	[7, 0]	7	82
1523	0.676346	0.323654	1	0	0.767501	0.21816	[6, 1]	6.08276	82
1582	0.67643	0.32357	1	0.993211	0.549613	0.00678921	[2, 0]	2	83
1583	0.676446	0.323554	1	0.991854	0.98949	0.00135698	[3, 0]	3	83
1584	0.676519	0.323481	1	0.986	0.963769	0.0058538	[3, 1]	3.16228	83
1585	0.676709	0.323291	1	0.970582	0.877105	0.0154177	[4, 2]	4.47214	83
1586	0.676728	0.323272	1	0.969022	0.965329	0.00156071	[3, 1]	3.16228	83
1587	0.677803	0.322197	1	0.881945	0.583983	0.0870767	[2, 1]	2.23607	83
1588	0.677804	0.322196	1	0.881879	0.989556	6.6232e-05	[3, 0]	3	83
1589	0.677805	0.322195	1	0.881795	0.965413	8.34398e-05	[3, 1]	3.16228	83
1590	0.677808	0.322192	1	0.88159	0.989761	0.000204931	[3, 0]	3	83
1591	0.678411	0.321589	1	0.832708	0.598495	0.0488825	[2, 0]	2	83
1592	0.67884	0.32116	1	0.79795	0.633253	0.0347582	[2, 0]	2	83
1593	0.678892	0.321108	1	0.793756	0.83139	0.00419369	[1, 0]	1	83
1594	0.678924	0.321076	1	0.791171	0.833976	0.00258533	[1, 0]	1	83
1595	0.679914	0.320086	1	0.710937	0.664216	0.0802332	[2, 1]	2.23607	83
1596	0.679926	0.320074	1	0.709979	0.665174	0.000958675	[2, 1]	2.23607	83
1597	0.680064	0.319936	1	0.698856	0.845098	0.0111223	[1, 0]	1	83
1600	0.6803	0.3197	1	0.980879	0.886726	0.0191212	[2, 0]	2	84
1601	0.682233	0.317767	1	0.824302	0.341487	0.156577	[2, 1]	2.23607	84
1602	0.682475	0.317525	1	0.804643	0.652913	0.0196593	[1, 2]	2.23607	84
1603	0.685558	0.314442	1	0.554975	0.854435	0.249668	[1, 3]	3.16228	84
1604	0.686779	0.313221	1	0.456052	0.491596	0.0989226	[1, 4]	4.12311	84
1605	0.686785	0.313215	1	0.45559	0.46607	0.000462085	[2, 5]	5.38516	84
1606	0.686832	0.313168	1	0.451773	0.469887	0.00381678	[2, 5]	5.38516	84
1607	0.690753	0.309247	1	0.134166	0.578509	0.317608	[3, 5]	5.83095	84
1608	0.690872	0.309128	1	0.12449	0.780023	0.00967545	[4, 4]	5.65685	84
1609	0.691192	0.308808	1	0.0985607	0.744008	0.0259298	[3, 3]	4.24264	84
1610	0.691775	0.308225	1	0.0513453	0.827238	0.0472154	[4, 4]	5.65685	84
1611	0.692225	0.307775	1	0.014924	0.780429	0.0364213	[3, 3]	4.24264	84
1612	0.692244	0.307756	1	0.0133475	0.782006	0.00157651	[3, 3]	4.24264	84
1613	0.692409	0.307591	1	0	0.96676	0.0133475	[2, 2]	2.82843	84
1622	0.694047	0.305953	1	0.867319	0.602568	0.132681	[1, 1]	1.41421	85
1623	0.69415	0.30585	1	0.858995	0.89505	0.00832427	[1, 2]	2.23607	85
1624	0.694167	0.305833	1	0.857592	0.895081	0.00140301	[2, 3]	3.60555	85
1625	0.699247	0.300753	1	0.446157	0.425257	0.411435	[2, 4]	4.47214	85
1626	0.701433	0.298567	1	0.269039	0.387954	0.177118	[3, 3]	4.24264	85
1627	0.701554	0.298446	1	0.259298	0.869996	0.00974114	[3, 2]	3.60555	85
1628	0.701561	0.298439	1	0.258698	0.970097	0.000600079	[3, 1]	3.16228	85
1629	0.702071	0.297929	1	0.217429	0.765893	0.0412691	[4, 0]	4	85
1630	0.702681	0.297319	1	0.168003	0.815319	0.0494258	[4, 0]	4	85
1631	0.704755	0.295245	1	0	0.983322	0.168003	[4, 0]	4	85
1659	0.705065	0.294935	1	0.974879	0.627689	0.0251214	[1, 1]	1.41421	86
1660	0.706711	0.293289	1	0.841592	0.582431	0.133286	[2, 2]	2.82843	86
1661	0.70682	0.29318	1	0.832704	0.591319	0.00888835	[2, 2]	2.82843	86
1662	0.708644	0.291356	1	0.684987	0.809261	0.147717	[2, 3]	3.60555	86
1663	0.709187	0.290813	1	0.641016	0.431925	0.0439709	[3, 4]	5	86
1664	0.70927	0.29073	1	0.63429	0.768499	0.00672644	[4, 5]	6.40312	86
1665	0.709706	0.290294	1	0.598933	0.467281	0.0353566	[3, 4]	5	86
1666	0.710155	0.289845	1	0.56258	0.845615	0.0363535	[2, 3]	3.60555	86
1667	0.711348	0.288652	1	0.465969	0.661018	0.0966105	[1, 2]	2.23607	86
1668	0.712752	0.287248	1	0.352227	0.741431	0.113742	[1, 1]	1.41421	86
1671	0.713445	0.286555	1	0.943895	0.647424	0.0561046	[2, 0]	2	87
1672	0.713818	0.286182	1	0.913646	0.677673	0.0302491	[2, 0]	2	87
1673	0.713911	0.286089	1	0.906119	0.916029	0.00752698	[1, 0]	1	87
1674	0.714913	0.285087	1	0.824942	0.75885	0.0811771	[2, 0]	2	87
1675	0.71696	0.28304	1	0.659179	0.744273	0.165763	[3, 0]	3	87
1676	0.718226	0.281774	1	0.556621	0.294428	0.102558	[3, 1]	3.16228	87
1677	0.718485	0.281515	1	0.535641	0.779831	0.0209804	[2, 0]	2	87
1678	0.718581	0.281419	1	0.527854	0.787618	0.007787	[2, 0]	2	87
1679	0.718647	0.281353	1	0.522491	0.976458	0.00536266	[1, 1]	1.41421	87
1680	0.721793	0.278207	1	0.267652	0.463388	0.254839	[1, 2]	2.23607	87
1681	0.72413	0.27587	1	0.0783576	0.652682	0.189294	[1, 2]	2.23607	87
1682	0.724497	0.275503	1	0.0486555	0.694877	0.0297021	[2, 2]	2.82843	87
1683	0.724574	0.275426	1	0.0424088	0.300675	0.00624675	[3, 1]	3.16228	87
1684	0.725098	0.274902	1	0	0.737285	0.0424088	[2, 2]	2.82843	87
1692	0.725307	0.274693	1	0.983057	0.761216	0.0169435	[2, 1]	2.23607	88
1693	0.72551	0.27449	1	0.966637	0.89603	0.0164197	[3, 2]	3.60555	88
1694	0.725761	0.274239	1	0.946271	0.890362	0.0203659	[4, 3]	5	88
1695	0.725776	0.274224	1	0.945068	0.77925	0.00120331	[3, 3]	4.24264	88
1696	0.726088	0.273912	1	0.919768	0.915662	0.0252998	[4, 3]	5	88
1697	0.726102	0.273898	1	0.918642	0.990886	0.00112542	[5, 4]	6.40312	88
1698	0.726261	0.273739	1	0.905755	0.858502	0.0128877	[5, 3]	5.83095	88
1699	0.726671	0.273329	1	0.872541	0.685263	0.0332139	[6, 3]	6.7082	88
1700	0.729116	0.270884	1	0.674512	0.66531	0.198029	[7, 4]	8.06226	88
1701	0.729593	0.270407	1	0.635854	0.723921	0.038658	[6, 3]	6.7082	88
1702	0.730873	0.269127	1	0.532212	0.768952	0.103642	[7, 4]	8.06226	88
1703	0.731095	0.268905	1	0.514189	0.863121	0.018023	[6, 4]	7.2111	88
1704	0.73115	0.26885	1	0.509751	0.827306	0.00443789	[6, 5]	7.81025	88
1705	0.731521	0.268479	1	0.479728	0.466711	0.0300234	[7, 6]	9.21954	88
1706	0.733008	0.266992	1	0.359291	0.947743	0.120437	[6, 5]	7.81025	88
1707	0.733008	0.266992	1	0.35928	0.990897	1.09319e-05	[5, 4]	6.40312	88
1708	0.733876	0.266124	1	0.288966	0.794234	0.0703133	[6, 3]	6.7082	88
1709	0.734007	0.265993	1	0.278334	0.804866	0.0106326	[6, 3]	6.7082	88
1710	0.734574	0.265426	1	0.232438	0.909017	0.0458961	[6, 4]	7.2111	88
1711	0.735179	0.264821	1	0.18342	0.958035	0.0490181	[6, 4]	7.2111	88
1712	0.735304	0.264696	1	0.173312	0.868609	0.0101072	[5, 3]	5.83095	88
1713	0.73531	0.26469	1	0.172849	0.991361	0.000463179	[5, 4]	6.40312	88
1714	0.735385	0.264615	1	0.166733	0.885536	0.00611578	[4, 4]	5.65685	88
1715	0.735438	0.264562	1	0.16241	0.889859	0.00432344	[4, 4]	5.65685	88
1716	0.735495	0.264505	1	0.157853	0.98794	0.00455726	[3, 4]	5	88
1717	0.73589	0.26411	1	0.125844	0.921868	0.0320087	[4, 4]	5.65685	88
1718	0.736189	0.263811	1	0.101584	0.950149	0.0242604	[4, 5]	6.40312	88
1719	0.737193	0.262807	1	0.0202764	0.73422	0.0813071	[3, 6]	6.7082	88
1720	0.737298	0.262702	1	0.0117881	0.66117	0.0084883	[3, 5]	5.83095	88
1721	0.737443	0.262557	1	0	0.749073	0.0117881	[2, 6]	6.32456	88
1752	0.737518	0.262482	1	0.993925	0.778465	0.0060753	[1, 1]	1.41421	90
1753	0.737593	0.262407	1	0.98785	0.902105	0.00607503	[1, 0]	1	90
1756	0.737893	0.262107	1	0.975728	0.554106	0.0242715	[1, 2]	2.23607	91
1757	0.738544	0.261456	1	0.923019	0.831175	0.0527099	[1, 1]	1.41421	91
1758	0.740502	0.259498	1	0.764427	0.625303	0.158592	[2, 1]	2.23607	91
1759	0.740505	0.259495	1	0.764134	0.956664	0.000292781	[3, 1]	3.16228	91
1760	0.740981	0.259019	1	0.725596	0.630305	0.0385382	[3, 2]	3.60555	91
1761	0.740997	0.259003	1	0.72435	0.992607	0.00124637	[4, 3]	5	91
1762	0.741291	0.258709	1	0.700523	0.8594	0.0238268	[5, 3]	5.83095	91
1763	0.741648	0.258352	1	0.671543	0.853117	0.0289794	[4, 2]	4.47214	91
1764	0.741764	0.258236	1	0.66216	0.687701	0.00938373	[3, 3]	4.24264	91
1765	0.742347	0.257653	1	0.614944	0.901651	0.047216	[2, 4]	4.47214	91
1766	0.742806	0.257194	1	0.577818	0.724827	0.0371257	[3, 3]	4.24264	91
1767	0.743137	0.256863	1	0.550941	0.9322	0.0268766	[2, 3]	3.60555	91
1768	0.743216	0.256784	1	0.544574	0.731195	0.00636783	[3, 3]	4.24264	91
1769	0.743572	0.256428	1	0.51576	0.850296	0.0288135	[3, 4]	5	91
1770	0.743833	0.256167	1	0.494587	0.626686	0.021173	[4, 4]	5.65685	91
1771	0.743895	0.256105	1	0.489544	0.773542	0.00504283	[5, 4]	6.40312	91
1772	0.743907	0.256093	1	0.488642	0.988842	0.000901804	[6, 4]	7.2111	91
1773	0.744103	0.255897	1	0.472758	0.803502	0.0158845	[6, 5]	7.81025	91
1774	0.744299	0.255701	1	0.456838	0.476423	0.0159199	[7, 5]	8.60233	91
1775	0.744689	0.255311	1	0.42524	0.8351	0.0315984	[6, 5]	7.81025	91
1776	0.744787	0.255213	1	0.417324	0.843016	0.00791582	[6, 5]	7.81025	91
1777	0.744862	0.255138	1	0.411247	0.964113	0.00607719	[6, 6]	8.48528	91
1778	0.745657	0.254343	1	0.346831	0.540839	0.0644159	[7, 5]	8.60233	91
1779	0.748321	0.251679	1	0.131061	0.756609	0.21577	[7, 5]	8.60233	91
1780	0.7484	0.2516	1	0.124658	0.849419	0.00640297	[6, 5]	7.81025	91
1781	0.748733	0.251267	1	0.0976954	0.476097	0.0269623	[7, 4]	8.06226	91
1782	0.748741	0.251259	1	0.0970568	0.950788	0.000638671	[7, 3]	7.61577	91
1783	0.749246	0.250754	1	0.0561407	0.909526	0.0409161	[7, 2]	7.28011	91
1784	0.749398	0.250602	1	0.0438725	0.69041	0.0122682	[7, 1]	7.07107	91
1785	0.749824	0.250176	1	0.00932571	0.54278	0.0345468	[6, 1]	6.08276	91
1786	0.749925	0.250075	1	0.00110771	0.698628	0.008218	[7, 1]	7.07107	91
1787	0.749939	0.250061	1	0	0.750181	0.00110771	[6, 2]	6.32456	91
1794	0.75011	0.24989	1	0.986156	0.755758	0.0138441	[1, 0]	1	92
1795	0.750647	0.249353	1	0.94267	0.39647	0.0434862	[1, 1]	1.41421	92
1796	0.751486	0.248514	1	0.87473	0.92734	0.0679399	[1, 3]	3.16228	92
1797	0.751565	0.248435	1	0.868295	0.901516	0.00643474	[2, 3]	3.60555	92
1798	0.751572	0.248428	1	0.867702	0.977051	0.000593474	[3, 4]	5	92
1799	0.751975	0.248025	1	0.835103	0.374086	0.0325987	[4, 5]	6.40312	92
1800	0.752279	0.247721	1	0.810493	0.68578	0.0246098	[3, 6]	6.7082	92
1801	0.752595	0.247405	1	0.784874	0.686637	0.0256191	[4, 7]	8.06226	92
1802	0.752626	0.247374	1	0.782402	0.881292	0.00247247	[3, 7]	7.61577	92
1803	0.753738	0.246262	1	0.692292	0.786995	0.0901094	[3, 8]	8.544	92
1804	0.753853	0.246147	1	0.682998	0.890587	0.00929451	[3, 7]	7.61577	92
1805	0.754952	0.245048	1	0.593939	0.497434	0.0890588	[4, 8]	8.94427	92
1806	0.755285	0.244715	1	0.566974	0.917552	0.026965	[3, 7]	7.61577	92
1807	0.755347	0.244653	1	0.561951	0.690803	0.00502243	[3, 6]	6.7082	92
1808	0.756022	0.243978	1	0.507273	0.811288	0.0546788	[3, 5]	5.83095	92
1809	0.75698	0.24302	1	0.429728	0.451631	0.077545	[4, 5]	6.40312	92
1810	0.757112	0.242888	1	0.418966	0.932629	0.0107612	[4, 4]	5.65685	92
1811	0.757239	0.242761	1	0.408707	0.987311	0.0102597	[3, 4]	5	92
1812	0.757308	0.242692	1	0.403092	0.907131	0.00561446	[2, 3]	3.60555	92
1813	0.757384	0.242616	1	0.396953	0.93348	0.00613969	[1, 3]	3.16228	92
1814	0.757694	0.242306	1	0.371858	0.759314	0.0250945	[1, 2]	2.23607	92
1815	0.758383	0.241617	1	0.316082	0.452246	0.0557759	[1, 1]	1.41421	92
1816	0.758508	0.241492	1	0.305885	0.462444	0.0101976	[1, 1]	1.41421	92
1817	0.758584	0.241416	1	0.299769	0.939595	0.0061154	[1, 3]	3.16228	92
1818	0.759094	0.240906	1	0.258421	0.800663	0.0413485	[1, 2]	2.23607	92
1819	0.759547	0.240453	1	0.221726	0.837357	0.0366942	[1, 2]	2.23607	92
1820	0.759666	0.240334	1	0.212159	0.472011	0.00956741	[1, 1]	1.41421	92
1821	0.759836	0.240164	1	0.198321	0.769596	0.0138383	[1, 0]	1	92
1822	0.759991	0.240009	1	0.185768	0.782148	0.0125523	[1, 0]	1	92
1823	0.760296	0.239704	1	0.16106	0.92636	0.0247089	[2, 0]	2	92
1824	0.760373	0.239627	1	0.154858	0.78835	0.00620132	[1, 0]	1	92
1825	0.760429	0.239571	1	0.150301	0.930917	0.0045575	[2, 0]	2	92
1828	0.760436	0.239564	1	0.999448	0.965965	0.000552405	[1, 0]	1	93
1829	0.760673	0.239327	1	0.980247	0.928726	0.0192005	[3, 0]	3	93
1830	0.76355	0.23645	1	0.74724	0.548238	0.233007	[3, 1]	3.16228	93
1831	0.764032	0.235968	1	0.708165	0.789256	0.0390747	[2, 0]	2	93
1832	0.764058	0.235942	1	0.706112	0.968019	0.00205337	[1, 0]	1	93
1835	0.764925	0.235075	1	0.929732	0.852274	0.0702684	[2, 1]	2.23607	94
1836	0.765051	0.234949	1	0.919564	0.941084	0.0101673	[2, 2]	2.82843	94
1837	0.765122	0.234878	1	0.913781	0.439087	0.00578357	[1, 1]	1.41421	94
1838	0.765421	0.234579	1	0.88959	0.861548	0.0241911	[2, 0]	2	94
1839	0.76744	0.23256	1	0.726044	0.602633	0.163545	[1, 1]	1.41421	94
1840	0.767466	0.232534	1	0.723944	0.966213	0.00210048	[1, 0]	1	94
1841	0.76749	0.23251	1	0.722007	0.930662	0.0019365	[3, 0]	3	94
1842	0.767553	0.232447	1	0.716827	0.935842	0.00517999	[3, 0]	3	94
1843	0.767643	0.232357	1	0.709574	0.479264	0.00725306	[4, 1]	4.12311	94
1844	0.767807	0.232193	1	0.696284	0.866407	0.0132903	[4, 2]	4.47214	94
1845	0.769148	0.230852	1	0.587641	0.735329	0.108643	[5, 3]	5.83095	94
1846	0.7693	0.2307	1	0.575369	0.878679	0.0122723	[4, 2]	4.47214	94
1847	0.769877	0.230123	1	0.528652	0.825967	0.0467169	[3, 2]	3.60555	94
1848	0.769956	0.230044	1	0.522247	0.858679	0.00640439	[2, 1]	2.23607	94
1849	0.770013	0.229987	1	0.517597	0.945735	0.00465021	[2, 2]	2.82843	94
1850	0.770937	0.229063	1	0.442749	0.587612	0.0748482	[2, 3]	3.60555	94
1851	0.77097	0.22903	1	0.440103	0.942241	0.00264619	[1, 3]	3.16228	94
1852	0.771949	0.228051	1	0.360768	0.681968	0.0793348	[1, 1]	1.41421	94
1853	0.772069	0.227931	1	0.351109	0.871207	0.00965941	[2, 0]	2	94
1854	0.772606	0.227394	1	0.307571	0.345061	0.043538	[3, 1]	3.16228	94
1855	0.772766	0.227234	1	0.29462	0.838918	0.012951	[3, 2]	3.60555	94
1856	0.772907	0.227093	1	0.283216	0.356464	0.0114034	[3, 1]	3.16228	94
1857	0.772931	0.227069	1	0.281254	0.937805	0.00196214	[3, 0]	3	94
1858	0.773085	0.226915	1	0.26874	0.702243	0.0125138	[4, 0]	4	94
1859	0.773296	0.226704	1	0.251689	0.646594	0.0170515	[5, 1]	5.09902	94
1860	0.7738	0.2262	1	0.210874	0.540505	0.0408142	[5, 0]	5	94
1861	0.775123	0.224877	1	0.103719	0.809398	0.107155	[4, 0]	4	94
1862	0.775203	0.224797	1	0.0972101	0.944314	0.00650943	[3, 0]	3	94
1863	0.775428	0.224572	1	0.0789999	0.876889	0.0182102	[2, 1]	2.23607	94
1864	0.775481	0.224519	1	0.0747052	0.950029	0.00429465	[2, 2]	2.82843	94
1865	0.776403	0.223597	1	0	0.43117	0.0747052	[3, 1]	3.16228	94
1873	0.777137	0.222863	1	0.940566	0.82065	0.0594343	[1, 0]	1	95
1874	0.77751	0.22249	1	0.910373	0.521789	0.0301929	[2, 0]	2	95
1875	0.777511	0.222489	1	0.910293	0.951986	7.9699e-05	[2, 1]	2.23607	95
1876	0.778491	0.221509	1	0.830847	0.380121	0.0794462	[3, 2]	3.60555	95
1877	0.779111	0.220889	1	0.780684	0.819115	0.0501632	[4, 3]	5	95
1878	0.779121	0.220879	1	0.779856	0.976086	0.000827907	[3, 4]	5	95
1879	0.779932	0.220068	1	0.71414	0.792097	0.0657157	[2, 4]	4.47214	95
1880	0.781207	0.218793	1	0.610889	0.891601	0.103251	[1, 4]	4.12311	95
1881	0.781251	0.218749	1	0.607298	0.969803	0.00359046	[1, 3]	3.16228	95
1882	0.781291	0.218709	1	0.604102	0.945438	0.00319637	[2, 2]	2.82843	95
1883	0.781448	0.218552	1	0.591362	0.889629	0.0127405	[3, 1]	3.16228	95
1884	0.78156	0.21844	1	0.582312	0.898679	0.00904948	[3, 1]	3.16228	95
1885	0.781561	0.218439	1	0.582257	0.741487	5.53083e-05	[4, 0]	4	95
1886	0.782108	0.217892	1	0.537894	0.883281	0.0443629	[3, 0]	3	95
1887	0.782315	0.217685	1	0.521163	0.468361	0.0167304	[4, 1]	4.12311	95
1888	0.782494	0.217506	1	0.506619	0.696512	0.0145441	[5, 1]	5.09902	95
1889	0.782808	0.217192	1	0.481191	0.716231	0.0254286	[5, 0]	5	95
1890	0.782896	0.217104	1	0.474075	0.878323	0.0071159	[6, 0]	6	95
1891	0.783759	0.216241	1	0.404197	0.766389	0.0698775	[5, 1]	5.09902	95
1892	0.783979	0.216021	1	0.386374	0.784212	0.0178235	[5, 1]	5.09902	95
1893	0.784433	0.215567	1	0.349598	0.778263	0.0367761	[4, 0]	4	95
1894	0.784463	0.215537	1	0.347153	0.885726	0.00244448	[3, 0]	3	95
1895	0.785551	0.214449	1	0.259022	0.60992	0.088131	[2, 0]	2	95
1896	0.785671	0.214329	1	0.249282	0.619661	0.00974029	[2, 0]	2	95
1897	0.785765	0.214235	1	0.241666	0.906295	0.00761581	[3, 1]	3.16228	95
1898	0.78758	0.21242	1	0.0946808	0.615347	0.146985	[4, 1]	4.12311	95
1899	0.788749	0.211251	1	0	0.878893	0.0946808	[5, 1]	5.09902	95
1912	0.789112	0.210888	1	0.970613	0.90828	0.0293871	[1, 1]	1.41421	96
1913	0.789204	0.210796	1	0.963146	0.757477	0.00746659	[1, 0]	1	96
1914	0.789244	0.210756	1	0.959878	0.911549	0.00326821	[1, 1]	1.41421	96
1915	0.789518	0.210482	1	0.937734	0.814241	0.0221437	[2, 0]	2	96
1916	0.789534	0.210466	1	0.936364	0.93357	0.00137051	[3, 0]	3	96
1917	0.789979	0.210021	1	0.900381	0.584221	0.0359832	[3, 1]	3.16228	96
1918	0.790293	0.209707	1	0.874945	0.803699	0.0254359	[4, 1]	4.12311	96
1919	0.790678	0.209322	1	0.843745	0.879669	0.0311995	[5, 0]	5	96
1920	0.790825	0.209175	1	0.831869	0.891545	0.0118757	[5, 0]	5	96
1921	0.791613	0.208387	1	0.768025	0.775431	0.063844	[4, 0]	4	96
1922	0.792097	0.207903	1	0.728805	0.814651	0.0392208	[4, 0]	4	96
1923	0.7921	0.2079	1	0.728594	0.989052	0.000210478	[5, 1]	5.09902	96
1924	0.792227	0.207773	1	0.718262	0.824983	0.0103319	[4, 0]	4	96
1925	0.792233	0.207767	1	0.717777	0.804184	0.000485422	[4, 1]	4.12311	96
1926	0.792242	0.207758	1	0.717059	0.98977	0.000717884	[5, 1]	5.09902	96
1927	0.79248	0.20752	1	0.697738	0.910866	0.0193207	[5, 0]	5	96
1928	0.792794	0.207206	1	0.672332	0.850389	0.0254058	[4, 0]	4	96
1929	0.792902	0.207098	1	0.66357	0.919628	0.00876222	[5, 0]	5	96
1930	0.792907	0.207093	1	0.663194	0.8787	0.000376558	[6, 0]	6	96
1931	0.793094	0.206906	1	0.648038	0.893855	0.0151553	[6, 0]	6	96
1932	0.79325	0.20675	1	0.635387	0.906506	0.0126513	[6, 0]	6	96
1933	0.793356	0.206644	1	0.626807	0.915086	0.00857969	[6, 0]	6	96
1934	0.793886	0.206114	1	0.583887	0.962549	0.0429208	[5, 0]	5	96
1935	0.793888	0.206112	1	0.583735	0.9627	0.000151212	[5, 0]	5	96
1936	0.79394	0.20606	1	0.579494	0.956228	0.00424161	[6, 1]	6.08276	96
1937	0.794365	0.205635	1	0.545098	0.659698	0.0343953	[6, 2]	6.32456	96
1938	0.794461	0.205539	1	0.537347	0.953189	0.00775165	[6, 3]	6.7082	96
1939	0.795012	0.204988	1	0.492649	0.875873	0.044698	[7, 3]	7.61577	96
1940	0.79548	0.20452	1	0.454753	0.970525	0.037896	[8, 3]	8.544	96
1941	0.797794	0.202206	1	0.267312	0.676444	0.187441	[8, 4]	8.94427	96
1942	0.797807	0.202193	1	0.266266	0.993653	0.00104561	[9, 3]	9.48683	96
1943	0.797817	0.202183	1	0.265459	0.99446	0.000807122	[9, 3]	9.48683	96
1944	0.800166	0.199834	1	0.0751813	0.876915	0.190278	[9, 5]	10.2956	96
1945	0.800501	0.199499	1	0.0481159	0.836464	0.0270654	[9, 4]	9.84886	96
1946	0.800515	0.199485	1	0.0469781	0.971663	0.00113775	[8, 3]	8.544	96
1947	0.800532	0.199468	1	0.0455543	0.97751	0.00142387	[7, 4]	8.06226	96
1948	0.801043	0.198957	1	0.00420875	0.776674	0.0413455	[6, 4]	7.2111	96
1949	0.801095	0.198905	1	0	0.881314	0.00420875	[6, 5]	7.81025	96
1977	0.801172	0.198828	1	0.993722	0.665977	0.00627819	[1, 1]	1.41421	98
1978	0.801601	0.198399	1	0.958996	0.8114	0.0347255	[2, 1]	2.23607	98
1979	0.801921	0.198079	1	0.933095	0.837301	0.0259012	[2, 1]	2.23607	98
1980	0.802287	0.197713	1	0.9034	0.879115	0.0296956	[1, 0]	1	98
1981	0.802418	0.197582	1	0.89283	0.889685	0.0105698	[1, 0]	1	98
1982	0.802647	0.197353	1	0.874281	0.786857	0.0185487	[2, 0]	2	98
1983	0.803025	0.196975	1	0.843646	0.867936	0.0306354	[2, 1]	2.23607	98
1984	0.803029	0.196971	1	0.843289	0.917908	0.000356645	[3, 0]	3	98
1985	0.803063	0.196937	1	0.840575	0.881393	0.00271352	[4, 1]	4.12311	98
1986	0.803063	0.196937	1	0.84056	0.977525	1.58426e-05	[3, 2]	3.60555	98
1987	0.803224	0.196776	1	0.827498	0.863358	0.013062	[2, 2]	2.82843	98
1988	0.803695	0.196305	1	0.789327	0.906107	0.0381707	[2, 1]	2.23607	98
1989	0.80395	0.19605	1	0.768721	0.938514	0.0206057	[3, 0]	3	98
1990	0.804154	0.195846	1	0.752185	0.922831	0.0165364	[3, 1]	3.16228	98
1991	0.804214	0.195786	1	0.747354	0.982356	0.00483095	[3, 2]	3.60555	98
1992	0.804524	0.195476	1	0.722236	0.932671	0.0251174	[4, 2]	4.47214	98
1993	0.804624	0.195376	1	0.714143	0.889486	0.00809306	[4, 1]	4.12311	98
1994	0.804715	0.195285	1	0.706719	0.780966	0.00742393	[4, 0]	4	98
1995	0.804902	0.195098	1	0.691616	0.926652	0.0151036	[5, 1]	5.09902	98
1996	0.804905	0.195095	1	0.691332	0.926936	0.000284127	[5, 1]	5.09902	98
1997	0.805136	0.194864	1	0.672636	0.494793	0.0186958	[6, 2]	6.32456	98
1998	0.806392	0.193608	1	0.570926	0.685932	0.10171	[6, 3]	6.7082	98
1999	0.806473	0.193527	1	0.564364	0.882435	0.00656204	[7, 3]	7.61577	98
2000	0.807282	0.192718	1	0.498852	0.831944	0.0655119	[6, 4]	7.2111	98
2001	0.807642	0.192358	1	0.469647	0.715136	0.0292046	[6, 3]	6.7082	98
2002	0.807838	0.192162	1	0.453782	0.558645	0.0158648	[7, 4]	8.06226	98
2003	0.80869	0.19131	1	0.384786	0.784132	0.068996	[6, 3]	6.7082	98
2004	0.808898	0.191102	1	0.367917	0.899304	0.0168693	[7, 3]	7.61577	98
2005	0.809302	0.190698	1	0.335219	0.816831	0.0326985	[6, 3]	6.7082	98
2006	0.809609	0.190391	1	0.3103	0.519712	0.0249188	[6, 2]	6.32456	98
2007	0.809791	0.190209	1	0.295561	0.900465	0.0147393	[5, 2]	5.38516	98
2008	0.809877	0.190123	1	0.288607	0.89644	0.0069537	[4, 1]	4.12311	98
2009	0.810345	0.189655	1	0.250706	0.818867	0.0379006	[4, 0]	4	98
2010	0.810763	0.189237	1	0.216857	0.820706	0.0338497	[2, 0]	2	98
2011	0.811781	0.188219	1	0.134378	0.903185	0.0824782	[2, 0]	2	98
2012	0.812052	0.187948	1	0.112448	0.687907	0.0219307	[1, 1]	1.41421	98
2013	0.812153	0.187847	1	0.104247	0.914308	0.00820097	[2, 1]	2.23607	98
2014	0.81277	0.18723	1	0.0542829	0.737871	0.0499637	[1, 1]	1.41421	98
2017	0.812884	0.187116	1	0.990744	0.65585	0.00925621	[2, 0]	2	99
2018	0.81367	0.18633	1	0.927111	0.877873	0.0636325	[1, 0]	1	99
2019	0.814284	0.185716	1	0.877377	0.927608	0.0497346	[1, 0]	1	99
2020	0.815086	0.184914	1	0.812426	0.7208	0.0649503	[2, 0]	2	99
2021	0.815276	0.184724	1	0.797005	0.905106	0.0154211	[3, 1]	3.16228	99
2022	0.815783	0.184217	1	0.755914	0.936142	0.0410914	[4, 1]	4.12311	99
2023	0.815797	0.184203	1	0.754832	0.990852	0.00108228	[4, 2]	4.47214	99
2024	0.815807	0.184193	1	0.754031	0.901266	0.000800801	[3, 2]	3.60555	99
2025	0.816115	0.183885	1	0.729057	0.924278	0.0249738	[3, 3]	4.24264	99
2026	0.816483	0.183517	1	0.699252	0.761	0.0298051	[2, 2]	2.82843	99
2027	0.816509	0.183491	1	0.697131	0.918149	0.00212097	[1, 1]	1.41421	99
2028	0.816625	0.183375	1	0.687752	0.927528	0.00937889	[1, 1]	1.41421	99
2029	0.817055	0.182945	1	0.652918	0.792311	0.0348345	[1, 2]	2.23607	99
2030	0.817164	0.182836	1	0.644069	0.769849	0.00884895	[2, 2]	2.82843	99
2031	0.817241	0.182759	1	0.637857	0.930489	0.00621139	[3, 3]	4.24264	99
2032	0.817628	0.182372	1	0.60648	0.801226	0.0313773	[2, 2]	2.82843	99
2033	0.818667	0.181333	1	0.522321	0.889026	0.0841594	[2, 3]	3.60555	99
2034	0.818829	0.181171	1	0.509202	0.914384	0.0131184	[3, 2]	3.60555	99
2035	0.81885	0.18115	1	0.507514	0.932177	0.00168818	[3, 3]	4.24264	99
2036	0.818882	0.181118	1	0.504947	0.99342	0.00256733	[4, 2]	4.47214	99
2037	0.819194	0.180806	1	0.479693	0.655559	0.025254	[5, 2]	5.38516	99
2038	0.819196	0.180804	1	0.479534	0.58777	0.000158372	[5, 1]	5.09902	99
2039	0.819808	0.180192	1	0.429958	0.887634	0.0495761	[5, 0]	5	99
2040	0.819819	0.180181	1	0.429034	0.939438	0.000924026	[7, 0]	7	99
2041	0.820161	0.179839	1	0.401325	0.95054	0.027709	[7, 1]	7.07107	99
2042	0.82036	0.17964	1	0.385231	0.836744	0.0160939	[6, 0]	6	99
2043	0.820481	0.179519	1	0.375432	0.897434	0.00979964	[5, 0]	5	99
2044	0.820807	0.179193	1	0.349036	0.86314	0.0263955	[6, 0]	6	99
2045	0.820842	0.179158	1	0.346192	0.942282	0.00284419	[7, 0]	7	99
2046	0.820909	0.179091	1	0.340754	0.956226	0.00543831	[6, 1]	6.08276	99
2047	0.821004	0.178996	1	0.333074	0.963905	0.00767945	[6, 1]	6.08276	99
2048	0.821511	0.178489	1	0.29196	0.955422	0.041114	[6, 2]	6.32456	99
2049	0.821833	0.178167	1	0.265879	0.959651	0.0260809	[5, 3]	5.83095	99
2050	0.822034	0.177966	1	0.249594	0.975937	0.0162856	[5, 3]	5.83095	99
2051	0.822045	0.177955	1	0.248704	0.656449	0.000890024	[5, 2]	5.38516	99
2052	0.822082	0.177918	1	0.245765	0.98626	0.00293856	[4, 3]	5	99
2053	0.822084	0.177916	1	0.245575	0.98645	0.000189985	[4, 3]	5	99
2054	0.822089	0.177911	1	0.2452	0.993795	0.000375224	[4, 2]	4.47214	99
2055	0.822269	0.177731	1	0.23057	0.919735	0.0146294	[3, 1]	3.16228	99
2056	0.822737	0.177263	1	0.1927	0.736498	0.0378699	[3, 0]	3	99
2057	0.822952	0.177048	1	0.175301	0.753898	0.0173997	[3, 0]	3	99
2058	0.823024	0.176976	1	0.169457	0.822674	0.00584372	[2, 1]	2.23607	99
2059	0.823755	0.176245	1	0.110185	0.780072	0.0592717	[2, 0]	2	99
2060	0.823779	0.176221	1	0.108312	0.929481	0.00187294	[1, 0]	1	99
2061	0.823998	0.176002	1	0.0905309	0.797853	0.0177816	[2, 0]	2	99
2062	0.824302	0.175698	1	0.0659317	0.847274	0.0245992	[2, 1]	2.23607	99
2063	0.824441	0.175559	1	0.0546679	0.809117	0.0112638	[2, 0]	2	99
2066	0.824458	0.175542	1	0.998609	0.965297	0.00139127	[2, 1]	2.23607	100
2067	0.824512	0.175488	1	0.994243	0.793622	0.00436602	[3, 1]	3.16228	100
2068	0.824526	0.175474	1	0.993139	0.920839	0.00110387	[3, 2]	3.60555	100
2069	0.825019	0.174981	1	0.95314	0.841225	0.0399987	[2, 3]	3.60555	100
2070	0.825288	0.174712	1	0.931354	0.814097	0.0217861	[1, 2]	2.23607	100
2071	0.825427	0.174573	1	0.920086	0.947705	0.0112685	[1, 1]	1.41421	100
2072	0.825576	0.174424	1	0.908066	0.826116	0.0120191	[1, 2]	2.23607	100
2073	0.825769	0.174231	1	0.892388	0.856903	0.015678	[2, 3]	3.60555	100
2074	0.827234	0.172766	1	0.773713	0.597939	0.118675	[3, 3]	4.24264	100
2075	0.827714	0.172286	1	0.734903	0.842995	0.0388105	[4, 4]	5.65685	100
2076	0.828605	0.171395	1	0.662677	0.859221	0.0722256	[3, 5]	5.83095	100
2077	0.828973	0.171027	1	0.632893	0.872779	0.0297843	[4, 4]	5.65685	100
2078	0.829027	0.170973	1	0.628536	0.877135	0.00435666	[4, 4]	5.65685	100
2079	0.830089	0.169911	1	0.542538	0.517168	0.085998	[4, 5]	6.40312	100
2080	0.830104	0.169896	1	0.541289	0.987969	0.00124893	[5, 6]	7.81025	100
2081	0.830262	0.169738	1	0.528488	0.669251	0.0128015	[6, 6]	8.48528	100
2082	0.830273	0.169727	1	0.527601	0.848161	0.00088719	[6, 5]	7.81025	100
2083	0.83028	0.16972	1	0.527012	0.988558	0.000589242	[5, 6]	7.81025	100
2084	0.830308	0.169692	1	0.52477	0.952271	0.00224161	[4, 7]	8.06226	100
2085	0.830452	0.169548	1	0.51311	0.943838	0.0116604	[3, 7]	7.61577	100
2086	0.83106	0.16894	1	0.463865	0.868112	0.0492447	[4, 8]	8.94427	100
2087	0.831099	0.168901	1	0.460656	0.95548	0.00320904	[4, 7]	8.06226	100
2088	0.831221	0.168779	1	0.45081	0.828961	0.00984567	[5, 8]	9.43398	100
2089	0.831528	0.168472	1	0.42591	0.853861	0.0249	[5, 8]	9.43398	100
2090	0.8325	0.1675	1	0.347221	0.93255	0.0786895	[5, 8]	9.43398	100
2091	0.832696	0.167304	1	0.331308	0.971392	0.0159124	[4, 7]	8.06226	100
2092	0.832807	0.167193	1	0.322354	0.980346	0.00895423	[4, 7]	8.06226	100
2093	0.832943	0.167057	1	0.311333	0.879132	0.0110209	[4, 8]	8.94427	100
2094	0.833082	0.166918	1	0.300075	0.749129	0.0112578	[3, 8]	8.544	100
2095	0.833096	0.166904	1	0.298911	0.957828	0.00116458	[2, 8]	8.24621	100
2096	0.833184	0.166816	1	0.291819	0.816209	0.00709183	[1, 8]	8.06226	100
2097	0.833279	0.166721	1	0.28413	0.823898	0.00768855	[1, 8]	8.06226	100
2098	0.833378	0.166622	1	0.276109	0.871379	0.00802165	[1, 6]	6.08276	100
2099	0.833939	0.166061	1	0.230685	0.633194	0.0454239	[1, 4]	4.12311	100
2100	0.83472	0.16528	1	0.167385	0.696494	0.0632994	[1, 4]	4.12311	100
2101	0.834878	0.165122	1	0.154616	0.909209	0.0127697	[1, 5]	5.09902	100
2102	0.835512	0.164488	1	0.10321	0.7479	0.0514059	[1, 4]	4.12311	100
2103	0.835618	0.164382	1	0.0946346	0.917785	0.0085752	[1, 5]	5.09902	100
2104	0.8357	0.1643	1	0.0880211	0.877993	0.00661351	[1, 6]	6.08276	100
2105	0.835714	0.164286	1	0.0868535	0.918952	0.00116761	[1, 5]	5.09902	100
2106	0.835763	0.164237	1	0.0828778	0.922928	0.00397575	[1, 5]	5.09902	100
2107	0.836144	0.163856	1	0.052047	0.77873	0.0308308	[1, 4]	4.12311	100
2108	0.836787	0.163213	1	0	0.606153	0.052047	[1, 3]	3.16228	100
2116	0.836852	0.163148	1	0.994718	0.907387	0.00528194	[1, 0]	1	101
2117	0.837051	0.162949	1	0.978578	0.842256	0.0161399	[1, 1]	1.41421	101
2118	0.837139	0.162861	1	0.971413	0.957706	0.0071655	[1, 2]	2.23607	101
2119	0.837316	0.162684	1	0.957102	0.871213	0.0143101	[2, 3]	3.60555	101
2120	0.83842	0.16158	1	0.867676	0.92137	0.0894261	[2, 2]	2.82843	101
2121	0.838483	0.161517	1	0.862605	0.981008	0.0050711	[3, 2]	3.60555	101
2122	0.838514	0.161486	1	0.860106	0.970518	0.00249894	[2, 1]	2.23607	101
2123	0.838795	0.161205	1	0.837316	0.930178	0.0227905	[1, 0]	1	101
2124	0.838817	0.161183	1	0.835507	0.959515	0.00180907	[1, 2]	2.23607	101
2125	0.838843	0.161157	1	0.833389	0.972635	0.00211769	[2, 1]	2.23607	101
2126	0.838935	0.161065	1	0.825978	0.980047	0.00741126	[2, 1]	2.23607	101
2127	0.839133	0.160867	1	0.809957	0.937391	0.0160208	[2, 2]	2.82843	101
2128	0.840355	0.159645	1	0.71092	0.524294	0.0990368	[3, 3]	4.24264	101
2129	0.841492	0.158508	1	0.618819	0.707448	0.0921007	[4, 4]	5.65685	101
2130	0.842068	0.157932	1	0.572208	0.873718	0.046611	[5, 4]	6.40312	101
2131	0.842083	0.157917	1	0.570966	0.82514	0.0012422	[6, 4]	7.2111	101
2132	0.842275	0.157725	1	0.555449	0.889235	0.0155173	[5, 4]	6.40312	101
2133	0.842895	0.157105	1	0.505242	0.757655	0.050207	[4, 4]	5.65685	101
2134	0.842914	0.157086	1	0.503704	0.973201	0.00153783	[3, 4]	5	101
2135	0.842915	0.157085	1	0.503609	0.987406	9.55605e-05	[3, 5]	5.83095	101
2136	0.843545	0.156455	1	0.452554	0.568222	0.0510543	[4, 5]	6.40312	101
2137	0.843553	0.156447	1	0.451892	0.967422	0.00066238	[3, 6]	6.7082	101
2138	0.843566	0.156434	1	0.450846	0.717277	0.00104564	[2, 5]	5.38516	101
2139	0.843713	0.156287	1	0.438951	0.926981	0.0118951	[1, 6]	6.08276	101
2140	0.843765	0.156235	1	0.434747	0.931185	0.00420369	[1, 6]	6.08276	101
2141	0.844044	0.155956	1	0.412136	0.885752	0.0226119	[1, 5]	5.09902	101
2142	0.844133	0.155867	1	0.404963	0.892924	0.0071722	[1, 5]	5.09902	101
2143	0.844142	0.155858	1	0.404222	0.931927	0.000741792	[1, 6]	6.08276	101
2144	0.844191	0.155809	1	0.400235	0.89691	0.00398612	[1, 5]	5.09902	101
2145	0.844263	0.155737	1	0.394413	0.902732	0.00582221	[1, 5]	5.09902	101
2146	0.844299	0.155701	1	0.391494	0.934846	0.00291889	[1, 6]	6.08276	101
2147	0.844654	0.155346	1	0.36273	0.931497	0.0287645	[1, 5]	5.09902	101
2148	0.844825	0.155175	1	0.348888	0.945339	0.0138419	[1, 5]	5.09902	101
2149	0.844888	0.155112	1	0.343801	0.932615	0.00508654	[1, 7]	7.07107	101
2150	0.844916	0.155084	1	0.341524	0.937123	0.00227784	[1, 6]	6.08276	101
2151	0.844932	0.155068	1	0.340239	0.938408	0.00128466	[1, 6]	6.08276	101
2152	0.845152	0.154848	1	0.322359	0.950495	0.0178797	[1, 7]	7.07107	101
2153	0.845158	0.154842	1	0.321898	0.950956	0.000460905	[1, 7]	7.07107	101
2154	0.845496	0.154504	1	0.29451	0.776517	0.027388	[1, 8]	8.06226	101
2155	0.845584	0.154416	1	0.287421	0.945497	0.00708939	[1, 6]	6.08276	101
2156	0.845613	0.154387	1	0.285068	0.960181	0.00235265	[2, 7]	7.28011	101
2157	0.845719	0.154281	1	0.276429	0.959595	0.00863915	[1, 7]	7.07107	101
2158	0.845762	0.154238	1	0.273008	0.963602	0.00342069	[2, 7]	7.28011	101
2159	0.845855	0.154145	1	0.265428	0.975003	0.00758049	[3, 6]	6.7082	101
2160	0.845856	0.154144	1	0.26534	0.987494	8.81544e-05	[3, 5]	5.83095	101
2161	0.846242	0.153758	1	0.234085	0.788909	0.0312547	[4, 4]	5.65685	101
2162	0.848249	0.151751	1	0.0715381	0.686841	0.162547	[3, 3]	4.24264	101
2163	0.848916	0.151084	1	0.0175193	0.858678	0.0540188	[4, 2]	4.47214	101
2164	0.848949	0.151051	1	0.0148644	0.900089	0.00265489	[4, 1]	4.12311	101
2165	0.849068	0.150932	1	0.00518939	0.95738	0.00967498	[5, 1]	5.09902	101
2166	0.849132	0.150868	1	0	0.93774	0.00518939	[5, 2]	5.38516	101
2201	0.84915	0.15085	1	0.99855	0.843706	0.00145017	[1, 0]	1	102
2202	0.849236	0.150764	1	0.991563	0.88498	0.00698697	[2, 1]	2.23607	102
2203	0.849306	0.150694	1	0.985923	0.975444	0.00564033	[3, 1]	3.16228	102
2204	0.849368	0.150632	1	0.980894	0.987385	0.00502815	[4, 2]	4.47214	102
2205	0.849368	0.150632	1	0.980883	0.975456	1.18631e-05	[3, 1]	3.16228	102
2206	0.849433	0.150567	1	0.975624	0.926097	0.00525826	[3, 2]	3.60555	102
2207	0.849548	0.150452	1	0.966347	0.935375	0.00927759	[3, 2]	3.60555	102
2208	0.849883	0.150117	1	0.939168	0.840704	0.0271788	[3, 3]	4.24264	102
2209	0.8507	0.1493	1	0.872986	0.855091	0.0661814	[2, 4]	4.47214	102
2210	0.850769	0.149231	1	0.867457	0.894555	0.00552903	[2, 3]	3.60555	102
2211	0.85103	0.14897	1	0.84627	0.980702	0.0211876	[2, 2]	2.82843	102
2212	0.851048	0.148952	1	0.844807	0.946801	0.00146283	[1, 1]	1.41421	102
2213	0.85107	0.14893	1	0.843041	0.982468	0.00176597	[2, 2]	2.82843	102
2214	0.851241	0.148759	1	0.829177	0.885077	0.0138641	[1, 3]	3.16228	102
2215	0.85125	0.14875	1	0.828461	0.827955	0.000716276	[1, 4]	4.12311	102
2216	0.851482	0.148518	1	0.809674	0.903864	0.0187869	[1, 3]	3.16228	102
2217	0.851795	0.148205	1	0.784311	0.919918	0.0253628	[2, 3]	3.60555	102
2218	0.851877	0.148123	1	0.777695	0.834571	0.00661587	[1, 4]	4.12311	102
2219	0.852194	0.147806	1	0.751999	0.92956	0.025696	[1, 3]	3.16228	102
2220	0.852613	0.147387	1	0.718078	0.868492	0.0339213	[1, 4]	4.12311	102
2221	0.852615	0.147385	1	0.717862	0.956443	0.000215421	[1, 5]	5.09902	102
2222	0.852687	0.147313	1	0.71206	0.950116	0.00580205	[2, 6]	6.32456	102
2223	0.852957	0.147043	1	0.690182	0.898793	0.0218785	[2, 5]	5.38516	102
2224	0.853085	0.146915	1	0.679804	0.960494	0.010378	[2, 6]	6.32456	102
2225	0.853602	0.146398	1	0.637976	0.728669	0.0418278	[3, 7]	7.61577	102
2226	0.853683	0.146317	1	0.631413	0.760461	0.00656302	[3, 8]	8.544	102
2227	0.853692	0.146308	1	0.630691	0.761183	0.000722106	[3, 8]	8.544	102
2228	0.85371	0.14629	1	0.629218	0.965074	0.00147251	[2, 8]	8.24621	102
2229	0.855332	0.144668	1	0.497829	0.628823	0.131389	[1, 7]	7.07107	102
2230	0.855343	0.144657	1	0.496901	0.961423	0.00092861	[2, 6]	6.32456	102
2231	0.855495	0.144505	1	0.484587	0.941795	0.0123138	[2, 7]	7.28011	102
2232	0.856867	0.143133	1	0.373457	0.872313	0.11113	[3, 8]	8.544	102
2233	0.857253	0.142747	1	0.342198	0.228345	0.031259	[5, 8]	9.43398	102
2234	0.861478	0.138522	1	0	0.570543	0.342198	[5, 8]	9.43398	102
2274	0.861489	0.138511	1	0.999063	0.976393	0.000937066	[1, 1]	1.41421	103
2275	0.861813	0.138187	1	0.972881	0.946099	0.0261816	[2, 0]	2	103
2276	0.861872	0.138128	1	0.968107	0.957964	0.00477458	[3, 1]	3.16228	103
2277	0.861892	0.138108	1	0.966437	0.947769	0.0016702	[2, 0]	2	103
2278	0.862332	0.137668	1	0.930819	0.920597	0.0356177	[2, 1]	2.23607	103
2279	0.862357	0.137643	1	0.928781	0.978431	0.00203811	[1, 1]	1.41421	103
2282	0.862442	0.137558	1	0.993149	0.95462	0.00685067	[1, 0]	1	104
2283	0.862513	0.137487	1	0.987335	0.960434	0.00581397	[1, 0]	1	104
2284	0.862572	0.137428	1	0.982634	0.951502	0.00470087	[3, 0]	3	104
2285	0.862582	0.137418	1	0.981819	0.938207	0.000815682	[3, 1]	3.16228	104
2286	0.862661	0.137339	1	0.975426	0.98644	0.00639329	[4, 2]	4.47214	104
2287	0.862661	0.137339	1	0.975386	0.988598	3.99088e-05	[4, 3]	5	104
2288	0.862744	0.137256	1	0.968657	0.993169	0.00672871	[4, 2]	4.47214	104
2289	0.862746	0.137254	1	0.968472	0.988783	0.000185117	[4, 3]	5	104
2290	0.862747	0.137253	1	0.96846	0.986463	1.22124e-05	[4, 4]	5.65685	104
2291	0.862809	0.137191	1	0.963373	0.722364	0.00508659	[3, 5]	5.83095	104
2292	0.863472	0.136528	1	0.909724	0.776013	0.053649	[3, 5]	5.83095	104
2293	0.863591	0.136409	1	0.90003	0.908488	0.00969436	[2, 5]	5.38516	104
2294	0.863833	0.136167	1	0.880483	0.928034	0.0195464	[2, 5]	5.38516	104
2295	0.864023	0.135977	1	0.865029	0.791467	0.0154541	[3, 5]	5.83095	104
2296	0.864579	0.135421	1	0.820029	0.425121	0.0450002	[3, 4]	5	104
2297	0.864874	0.135126	1	0.796101	0.815394	0.0239275	[3, 5]	5.83095	104
2298	0.864992	0.135008	1	0.78656	0.937575	0.00954089	[2, 5]	5.38516	104
2299	0.865112	0.134888	1	0.776838	0.945865	0.00972293	[2, 6]	6.32456	104
2300	0.865159	0.134841	1	0.773067	0.947608	0.00377022	[1, 7]	7.07107	104
2301	0.8652	0.1348	1	0.769751	0.906501	0.00331614	[1, 5]	5.09902	104
2302	0.865203	0.134797	1	0.769515	0.994031	0.000236316	[1, 4]	4.12311	104
2303	0.866181	0.133819	1	0.690235	0.685433	0.0792801	[1, 3]	3.16228	104
2304	0.866183	0.133817	1	0.690072	0.994194	0.000162814	[1, 4]	4.12311	104
2305	0.866197	0.133803	1	0.688975	0.99529	0.00109648	[1, 4]	4.12311	104
2306	0.866243	0.133757	1	0.685252	0.986192	0.00372374	[2, 3]	3.60555	104
2307	0.866412	0.133588	1	0.671571	0.988683	0.0136803	[2, 2]	2.82843	104
2308	0.866427	0.133573	1	0.670357	0.946712	0.00121467	[3, 2]	3.60555	104
2309	0.866445	0.133555	1	0.668917	0.990223	0.00144025	[4, 3]	5	104
2310	0.867103	0.132897	1	0.615611	0.478427	0.0533055	[3, 4]	5	104
2311	0.867113	0.132887	1	0.614764	0.987039	0.000846709	[2, 3]	3.60555	104
2312	0.867736	0.132264	1	0.564278	0.73592	0.0504866	[1, 3]	3.16228	104
2313	0.867737	0.132263	1	0.564259	0.995309	1.83385e-05	[1, 4]	4.12311	104
2314	0.867806	0.132194	1	0.558614	0.912146	0.00564561	[1, 5]	5.09902	104
2315	0.867829	0.132171	1	0.556777	0.947702	0.00183692	[2, 6]	6.32456	104
2316	0.867857	0.132143	1	0.554495	0.939857	0.00228212	[2, 5]	5.38516	104
2317	0.868231	0.131769	1	0.524191	0.845698	0.0303034	[3, 5]	5.83095	104
2318	0.868706	0.131294	1	0.485743	0.814965	0.0384485	[3, 6]	6.7082	104
2319	0.868715	0.131285	1	0.485024	0.94842	0.000718883	[2, 6]	6.32456	104
2320	0.868816	0.131184	1	0.476811	0.899814	0.00821298	[2, 7]	7.28011	104
2321	0.868821	0.131179	1	0.476438	0.98138	0.000372608	[3, 7]	7.61577	104
2322	0.869141	0.130859	1	0.450518	0.941583	0.0259207	[3, 8]	8.544	104
2323	0.869391	0.130609	1	0.430268	0.962532	0.0202499	[4, 7]	8.06226	104
2324	0.869411	0.130589	1	0.428599	0.943251	0.00166833	[3, 8]	8.544	104
2325	0.86951	0.13049	1	0.420638	0.970494	0.00796181	[4, 7]	8.06226	104
2326	0.869688	0.130312	1	0.406188	0.99583	0.01445	[3, 7]	7.61577	104
2327	0.869725	0.130275	1	0.403169	0.95144	0.00301914	[2, 6]	6.32456	104
2328	0.869989	0.130011	1	0.381853	0.933462	0.0213154	[1, 5]	5.09902	104
2329	0.870063	0.129937	1	0.37585	0.625664	0.00600324	[1, 6]	6.08276	104
2330	0.870467	0.129533	1	0.343117	0.658397	0.032733	[1, 6]	6.08276	104
2331	0.872402	0.127598	1	0.186366	0.815148	0.156751	[1, 6]	6.08276	104
2332	0.872445	0.127555	1	0.182921	0.951053	0.00344502	[1, 7]	7.07107	104
2333	0.872493	0.127507	1	0.179018	0.954956	0.00390325	[1, 7]	7.07107	104
2334	0.872515	0.127485	1	0.177244	0.95673	0.00177399	[1, 7]	7.07107	104
2335	0.872696	0.127304	1	0.162556	0.829835	0.0146871	[1, 6]	6.08276	104
2336	0.872728	0.127272	1	0.159979	0.936039	0.00257738	[1, 5]	5.09902	104
2337	0.872735	0.127265	1	0.159417	0.936601	0.000561698	[1, 5]	5.09902	104
2338	0.872779	0.127221	1	0.155821	0.940198	0.00359691	[1, 5]	5.09902	104
2339	0.872927	0.127073	1	0.143869	0.952149	0.0119512	[1, 5]	5.09902	104
2340	0.873085	0.126915	1	0.131015	0.933452	0.0128546	[2, 4]	4.47214	104
2341	0.873131	0.126869	1	0.127318	0.999005	0.00369649	[1, 4]	4.12311	104
2342	0.873136	0.126864	1	0.126889	0.987468	0.000429051	[2, 3]	3.60555	104
2343	0.873165	0.126835	1	0.124576	0.949026	0.00231345	[3, 2]	3.60555	104
2344	0.873436	0.126564	1	0.102572	0.952182	0.0220039	[2, 1]	2.23607	104
2345	0.873442	0.126558	1	0.102156	0.95838	0.000415599	[1, 1]	1.41421	104
2346	0.873462	0.126538	1	0.10052	0.962071	0.00163655	[1, 0]	1	104
2349	0.873498	0.126502	1	0.997079	0.991604	0.00292131	[2, 0]	2	105
2350	0.873557	0.126443	1	0.992304	0.798396	0.00477431	[2, 1]	2.23607	105
2351	0.873669	0.126331	1	0.98322	0.947291	0.00908452	[3, 2]	3.60555	105
2352	0.873734	0.126266	1	0.977921	0.985646	0.0052993	[4, 2]	4.47214	105
2353	0.873774	0.126226	1	0.974692	0.990613	0.00322816	[5, 2]	5.38516	105
2354	0.873871	0.126129	1	0.966896	0.965177	0.00779669	[5, 3]	5.83095	105
2355	0.873945	0.126055	1	0.960839	0.971233	0.00605662	[5, 3]	5.83095	105
2356	0.873947	0.126053	1	0.960665	0.962245	0.000174553	[6, 3]	6.7082	105
2357	0.873969	0.126031	1	0.958945	0.972953	0.00171906	[5, 3]	5.83095	105
2358	0.874124	0.125876	1	0.946374	0.974817	0.0125715	[6, 3]	6.7082	105
2359	0.874159	0.125841	1	0.943524	0.85794	0.00284956	[7, 4]	8.06226	105
2360	0.874167	0.125833	1	0.942867	0.973858	0.000657598	[8, 4]	8.94427	105
2361	0.874679	0.125321	1	0.901389	0.900156	0.041478	[8, 5]	9.43398	105
2362	0.874809	0.125191	1	0.890866	0.924907	0.0105226	[8, 6]	10	105
2363	0.875037	0.124963	1	0.872395	0.960266	0.0184708	[9, 6]	10.8167	105
2364	0.875047	0.124953	1	0.871591	0.846502	0.000804932	[9, 5]	10.2956	105
2365	0.875319	0.124681	1	0.849539	0.75072	0.0220516	[9, 3]	9.48683	105
2366	0.87558	0.12442	1	0.828464	0.986149	0.0210752	[9, 4]	9.84886	105
2367	0.87558	0.12442	1	0.828452	0.97387	1.15785e-05	[8, 4]	8.94427	105
2368	0.875884	0.124116	1	0.803808	0.503071	0.0246444	[7, 3]	7.61577	105
2369	0.875929	0.124071	1	0.800198	0.562254	0.0036095	[6, 4]	7.2111	105
2370	0.875935	0.124065	1	0.799708	0.858431	0.000490483	[7, 4]	8.06226	105
2371	0.876053	0.123947	1	0.790089	0.983489	0.00961853	[8, 4]	8.94427	105
2372	0.876098	0.123902	1	0.786506	0.903739	0.00358345	[8, 5]	9.43398	105
2373	0.876129	0.123871	1	0.783988	0.927425	0.00251785	[8, 6]	10	105
2374	0.876135	0.123865	1	0.78346	0.960793	0.000527764	[9, 6]	10.8167	105
2375	0.876371	0.123629	1	0.764375	0.869474	0.0190848	[8, 7]	10.6301	105
2376	0.87663	0.12337	1	0.743368	0.835972	0.0210069	[7, 7]	9.89949	105
2377	0.876822	0.123178	1	0.727832	0.976959	0.0155365	[6, 6]	8.48528	105
2378	0.878752	0.121248	1	0.571522	0.676022	0.15631	[5, 6]	7.81025	105
2379	0.878817	0.121183	1	0.566207	0.968015	0.00531552	[4, 5]	6.40312	105
2380	0.878932	0.121068	1	0.556899	0.987739	0.00930843	[3, 5]	5.83095	105
2381	0.879056	0.120944	1	0.546851	0.686492	0.0100478	[2, 4]	4.47214	105
2382	0.879161	0.120839	1	0.538391	0.819748	0.00846007	[3, 3]	4.24264	105
2383	0.879175	0.120825	1	0.537247	0.988611	0.00114317	[2, 3]	3.60555	105
2384	0.879366	0.120634	1	0.521756	0.83524	0.0154916	[3, 3]	4.24264	105
2385	0.879443	0.120557	1	0.515485	0.574493	0.00627064	[4, 3]	5	105
2386	0.879496	0.120504	1	0.511207	0.578771	0.00427847	[4, 3]	5	105
2387	0.879779	0.120221	1	0.488316	0.601662	0.0228911	[4, 3]	5	105
2388	0.880815	0.119185	1	0.404417	0.68556	0.0838982	[4, 3]	5	105
2389	0.88085	0.11915	1	0.40156	0.950148	0.0028569	[3, 2]	3.60555	105
2390	0.880968	0.119032	1	0.392022	0.969134	0.00953886	[2, 2]	2.82843	105
2391	0.881031	0.118969	1	0.386865	0.803553	0.00515644	[2, 1]	2.23607	105
2392	0.88105	0.11895	1	0.385333	0.970666	0.00153255	[2, 2]	2.82843	105
2393	0.881063	0.118937	1	0.384317	0.971682	0.0010156	[2, 2]	2.82843	105
2394	0.881314	0.118686	1	0.363981	0.560842	0.0203363	[1, 3]	3.16228	105
2395	0.882073	0.117927	1	0.302508	0.797393	0.0614731	[1, 2]	2.23607	105
2396	0.882262	0.117738	1	0.287214	0.818847	0.0152939	[2, 1]	2.23607	105
2397	0.882569	0.117431	1	0.262352	0.983241	0.0248617	[1, 1]	1.41421	105
2398	0.882577	0.117423	1	0.261637	0.99232	0.000715408	[2, 0]	2	105
2399	0.882631	0.117369	1	0.257271	0.955868	0.00436599	[1, 0]	1	105
2406	0.882814	0.117186	1	0.985186	0.918554	0.0148143	[2, 1]	2.23607	108
2407	0.882841	0.117159	1	0.983004	0.925109	0.00218146	[3, 1]	3.16228	108
2408	0.882879	0.117121	1	0.979942	0.989211	0.00306209	[4, 1]	4.12311	108
2409	0.882879	0.117121	1	0.979941	0.999006	8.89204e-07	[4, 2]	4.47214	108
2410	0.882883	0.117117	1	0.97962	0.95247	0.000321551	[3, 2]	3.60555	108
2411	0.882989	0.117011	1	0.971034	0.927139	0.00858543	[2, 1]	2.23607	108
2412	0.883145	0.116855	1	0.95842	0.912428	0.0126144	[2, 2]	2.82843	108
2413	0.883427	0.116573	1	0.935571	0.912084	0.0228486	[3, 3]	4.24264	108
2414	0.883625	0.116375	1	0.919505	0.864227	0.0160666	[2, 3]	3.60555	108
2415	0.883627	0.116373	1	0.919379	0.864353	0.00012549	[2, 3]	3.60555	108
2416	0.883629	0.116371	1	0.919215	0.955586	0.000164222	[1, 2]	2.23607	108
2417	0.883672	0.116328	1	0.915693	0.959108	0.00352157	[1, 2]	2.23607	108
2418	0.883699	0.116301	1	0.913524	0.914598	0.00216967	[2, 2]	2.82843	108
2419	0.883842	0.116158	1	0.90197	0.964024	0.0115539	[3, 2]	3.60555	108
2420	0.883842	0.116158	1	0.901926	0.99905	4.39134e-05	[4, 2]	4.47214	108
2421	0.883844	0.116156	1	0.901781	0.999195	0.000145266	[4, 2]	4.47214	108
2422	0.883846	0.116154	1	0.901627	0.999349	0.000153954	[4, 2]	4.47214	108
2423	0.883877	0.116123	1	0.899081	0.91463	0.00254603	[3, 3]	4.24264	108
2424	0.88391	0.11609	1	0.896455	0.975578	0.00262574	[3, 4]	5	108
2425	0.884289	0.115711	1	0.865721	0.871438	0.0307336	[4, 3]	5	108
2426	0.884361	0.115639	1	0.85989	0.87727	0.0058315	[4, 3]	5	108
2427	0.885085	0.114915	1	0.801247	0.561714	0.0586431	[5, 3]	5.83095	108
2428	0.8851	0.1149	1	0.800006	0.938981	0.00124097	[6, 3]	6.7082	108
2429	0.88514	0.11486	1	0.796795	0.964005	0.00321122	[7, 4]	8.06226	108
2430	0.885156	0.114844	1	0.795468	0.928752	0.00132672	[8, 4]	8.94427	108
2431	0.88517	0.11483	1	0.794386	0.950108	0.00108226	[9, 5]	10.2956	108
2432	0.885213	0.114787	1	0.790859	0.973624	0.00352702	[8, 6]	10	108
2433	0.885287	0.114713	1	0.784852	0.864437	0.00600659	[8, 5]	9.43398	108
2434	0.885649	0.114351	1	0.755569	0.97939	0.0292825	[9, 5]	10.2956	108
2435	0.885694	0.114306	1	0.751898	0.932423	0.00367104	[8, 4]	8.94427	108
2436	0.885759	0.114241	1	0.746621	0.969282	0.00527704	[7, 4]	8.06226	108
2437	0.886697	0.113303	1	0.670691	0.745182	0.0759309	[7, 5]	8.60233	108
2438	0.886743	0.113257	1	0.666983	0.93613	0.0037078	[8, 4]	8.94427	108
2439	0.886857	0.113143	1	0.657744	0.878712	0.00923837	[9, 4]	9.84886	108
2440	0.887047	0.112953	1	0.642298	0.874668	0.0154467	[9, 6]	10.8167	108
2441	0.887136	0.112864	1	0.635159	0.871576	0.00713872	[8, 5]	9.43398	108
2442	0.887226	0.112774	1	0.627812	0.986737	0.00734651	[9, 5]	10.2956	108
2443	0.887256	0.112744	1	0.625407	0.989142	0.00240537	[9, 5]	10.2956	108
2444	0.88734	0.11266	1	0.618615	0.885505	0.00679254	[9, 4]	9.84886	108
2445	0.887475	0.112525	1	0.607658	0.896461	0.0109561	[9, 4]	9.84886	108
2446	0.887573	0.112427	1	0.599755	0.879479	0.00790325	[8, 5]	9.43398	108
2447	0.887599	0.112401	1	0.597655	0.991242	0.00209971	[9, 5]	10.2956	108
2448	0.887706	0.112294	1	0.58892	0.883403	0.00873549	[9, 6]	10.8167	108
2449	0.887821	0.112179	1	0.579632	0.892691	0.00928778	[9, 6]	10.8167	108
2450	0.887922	0.112078	1	0.571441	0.900882	0.00819112	[9, 6]	10.8167	108
2451	0.88853	0.11147	1	0.522185	0.928736	0.0492563	[8, 5]	9.43398	108
2452	0.888545	0.111455	1	0.520968	0.992459	0.00121664	[9, 5]	10.2956	108
2453	0.88888	0.11112	1	0.493841	0.963257	0.027127	[8, 4]	8.94427	108
2454	0.888931	0.111069	1	0.489704	0.932873	0.00413746	[8, 5]	9.43398	108
2455	0.890108	0.109892	1	0.394428	0.840457	0.0952753	[7, 5]	8.60233	108
2456	0.890141	0.109859	1	0.391706	0.972004	0.00272222	[7, 4]	8.06226	108
2457	0.890182	0.109818	1	0.388412	0.942275	0.00329437	[6, 3]	6.7082	108
2458	0.890462	0.109538	1	0.365722	0.955361	0.02269	[5, 2]	5.38516	108
2459	0.890524	0.109476	1	0.360729	0.960354	0.00499231	[5, 2]	5.38516	108
2460	0.890844	0.109156	1	0.334736	0.99129	0.0259932	[5, 1]	5.09902	108
2461	0.890983	0.109017	1	0.323484	0.854959	0.0112522	[5, 0]	5	108
2462	0.892069	0.107931	1	0.235509	0.658518	0.087975	[6, 1]	6.08276	108
2463	0.892104	0.107896	1	0.232681	0.986069	0.002828	[6, 0]	6	108
2464	0.89216	0.10784	1	0.228209	0.990541	0.00447201	[6, 0]	6	108
2465	0.892243	0.107757	1	0.221477	0.954475	0.00673189	[4, 0]	4	108
2466	0.892312	0.107688	1	0.215835	0.960118	0.00564245	[4, 0]	4	108
2467	0.892581	0.107419	1	0.194094	0.840587	0.0217406	[2, 0]	2	108
2468	0.892919	0.107081	1	0.166704	0.712951	0.0273905	[1, 1]	1.41421	108
2469	0.892927	0.107073	1	0.166046	0.959765	0.000657184	[1, 2]	2.23607	108
2470	0.89304	0.10696	1	0.156856	0.722141	0.00919044	[1, 1]	1.41421	108
2471	0.893351	0.106649	1	0.131705	0.747292	0.0251506	[1, 1]	1.41421	108
2472	0.89362	0.10638	1	0.109942	0.769056	0.0217637	[1, 1]	1.41421	108
2473	0.893646	0.106354	1	0.107782	0.992383	0.00215939	[1, 0]	1	108
2476	0.894182	0.105818	1	0.956585	0.915729	0.0434153	[1, 0]	1	109
2477	0.894545	0.105455	1	0.927176	0.798465	0.0294091	[1, 1]	1.41421	109
2478	0.894851	0.105149	1	0.902388	0.964645	0.024788	[2, 1]	2.23607	109
2479	0.895018	0.104982	1	0.888925	0.96361	0.013462	[3, 1]	3.16228	109
2480	0.895026	0.104974	1	0.888271	0.927794	0.000654367	[2, 0]	2	109
2481	0.895055	0.104945	1	0.885938	0.970348	0.00233275	[3, 0]	3	109
2482	0.895175	0.104825	1	0.876176	0.937556	0.00976224	[2, 0]	2	109
2483	0.895199	0.104801	1	0.874235	0.939497	0.00194095	[2, 0]	2	109
2484	0.89523	0.10477	1	0.871705	0.918259	0.00253003	[1, 0]	1	109
2485	0.895429	0.104571	1	0.855596	0.955606	0.0161095	[2, 0]	2	109
2486	0.895528	0.104472	1	0.847556	0.97165	0.00803991	[3, 1]	3.16228	109
2487	0.895939	0.104061	1	0.8143	0.594098	0.0332559	[4, 2]	4.47214	109
2488	0.896034	0.103966	1	0.806569	0.979381	0.00773084	[3, 1]	3.16228	109
2489	0.896068	0.103932	1	0.803863	0.973054	0.00270561	[3, 0]	3	109
2490	0.896225	0.103775	1	0.791165	0.99208	0.0126988	[3, 1]	3.16228	109
2491	0.896265	0.103735	1	0.787855	0.967955	0.00330999	[2, 1]	2.23607	109
2492	0.896267	0.103733	1	0.787742	0.992192	0.000112375	[3, 1]	3.16228	109
2493	0.897585	0.102415	1	0.680938	0.700902	0.106804	[4, 2]	4.47214	109
2494	0.897603	0.102397	1	0.679494	0.702346	0.00144422	[4, 2]	4.47214	109
2495	0.89761	0.10239	1	0.678915	0.971073	0.000579109	[4, 1]	4.12311	109
2496	0.89814	0.10186	1	0.636054	0.745207	0.0428613	[4, 2]	4.47214	109
2497	0.898158	0.101842	1	0.634535	0.985007	0.00151827	[5, 1]	5.09902	109
2498	0.898373	0.101627	1	0.61716	0.857963	0.0173759	[6, 1]	6.08276	109
2499	0.898426	0.101574	1	0.612873	0.929396	0.00428694	[7, 1]	7.07107	109
2500	0.898537	0.101463	1	0.603854	0.938415	0.00901892	[7, 1]	7.07107	109
2501	0.898559	0.101441	1	0.602069	0.87892	0.00178496	[8, 0]	8	109
2502	0.898569	0.101431	1	0.601244	0.953007	0.000825149	[8, 1]	8.06226	109
2503	0.898581	0.101419	1	0.600332	0.915542	0.000911874	[7, 0]	7	109
2504	0.898671	0.101329	1	0.593021	0.960317	0.0073104	[8, 1]	8.06226	109
2505	0.898682	0.101318	1	0.592118	0.939319	0.000903676	[7, 1]	7.07107	109
2506	0.898748	0.101252	1	0.586769	0.965666	0.00534896	[8, 1]	8.06226	109
2507	0.899186	0.100814	1	0.551287	0.936364	0.0354821	[7, 2]	7.28011	109
2508	0.899688	0.100312	1	0.510626	0.898623	0.0406602	[6, 1]	6.08276	109
2509	0.90109	0.0989095	1	0.397027	0.772117	0.113599	[6, 0]	6	109
2510	0.901194	0.0988055	1	0.388603	0.965155	0.00842468	[4, 0]	4	109
2511	0.901254	0.0987458	1	0.383762	0.977894	0.00484072	[3, 0]	3	109
2512	0.901333	0.098667	1	0.377385	0.971532	0.00637731	[4, 0]	4	109
2513	0.901334	0.0986659	1	0.377294	0.992282	9.02207e-05	[3, 1]	3.16228	109
2514	0.901401	0.0985988	1	0.371857	0.983332	0.00543745	[3, 0]	3	109
2515	0.901403	0.0985972	1	0.371725	0.992414	0.000132071	[3, 1]	3.16228	109
2516	0.901429	0.0985708	1	0.369586	0.985471	0.00213899	[3, 0]	3	109
2517	0.901437	0.0985628	1	0.368943	0.993057	0.00064301	[3, 1]	3.16228	109
2518	0.901537	0.0984627	1	0.360835	0.963714	0.00810771	[2, 0]	2	109
2519	0.901544	0.0984557	1	0.360264	0.986042	0.000570751	[3, 0]	3	109
2520	0.901631	0.0983688	1	0.353224	0.978573	0.0070407	[4, 0]	4	109
2521	0.901639	0.0983608	1	0.352577	0.975464	0.000646896	[5, 0]	5	109
2522	0.901809	0.0981905	1	0.338786	0.912414	0.013791	[6, 1]	6.08276	109
2523	0.901899	0.0981015	1	0.331573	0.946532	0.00721289	[7, 1]	7.07107	109
2524	0.901997	0.0980028	1	0.323581	0.973658	0.00799195	[8, 1]	8.06226	109
2525	0.902058	0.0979419	1	0.318649	0.901393	0.0049318	[9, 0]	9	109
2526	0.902139	0.0978609	1	0.312086	0.885484	0.00656355	[8, 0]	8	109
2527	0.90217	0.0978298	1	0.309567	0.888002	0.0025184	[8, 0]	8	109
2528	0.902361	0.0976393	1	0.294138	0.903432	0.0154295	[8, 0]	8	109
2529	0.902387	0.0976131	1	0.292014	0.903516	0.00212317	[9, 0]	9	109
2530	0.90244	0.0975604	1	0.287745	0.907785	0.00426947	[9, 0]	9	109
2531	0.902582	0.0974176	1	0.276176	0.919354	0.0115689	[9, 0]	9	109
2532	0.902665	0.0973347	1	0.269464	0.922254	0.0067124	[7, 0]	7	109
2533	0.90277	0.09723	1	0.260982	0.98214	0.00848196	[8, 1]	8.06226	109
2534	0.902772	0.0972276	1	0.260792	0.946721	0.000189288	[7, 1]	7.07107	109
2535	0.902887	0.0971134	1	0.251537	0.921669	0.00925513	[6, 1]	6.08276	109
2536	0.903036	0.0969638	1	0.239421	0.98758	0.0121162	[5, 0]	5	109
2537	0.903062	0.0969382	1	0.237345	0.988117	0.00207564	[3, 0]	3	109
2538	0.90308	0.0969202	1	0.235889	0.969412	0.00145687	[2, 1]	2.23607	109
2539	0.903186	0.0968142	1	0.227306	0.972607	0.00858285	[1, 2]	2.23607	109
2540	0.903839	0.0961609	1	0.174386	0.851384	0.0529196	[1, 1]	1.41421	109
2541	0.903882	0.096118	1	0.170916	0.967184	0.00347048	[2, 0]	2	109
2542	0.90392	0.0960795	1	0.167794	0.921381	0.00312209	[1, 0]	1	109
2543	0.903974	0.0960259	1	0.163452	0.925722	0.00434114	[1, 0]	1	109
2544	0.90398	0.0960203	1	0.163	0.926174	0.000452174	[1, 0]	1	109
2545	0.904043	0.0959575	1	0.157908	0.931266	0.0050925	[1, 0]	1	109
2546	0.904348	0.0956523	1	0.133192	0.955983	0.0247161	[1, 0]	1	109
2549	0.904745	0.0952547	1	0.96779	0.804327	0.0322102	[1, 1]	1.41421	110
2550	0.904871	0.0951289	1	0.957601	0.889322	0.0101891	[1, 3]	3.16228	110
2551	0.905013	0.0949867	1	0.946086	0.880006	0.0115142	[2, 4]	4.47214	110
2552	0.905017	0.0949832	1	0.945804	0.996113	0.00028222	[3, 4]	5	110
2553	0.90502	0.0949797	1	0.945517	0.9964	0.000287501	[3, 4]	5	110
2554	0.907153	0.0928473	1	0.772796	0.848742	0.172721	[2, 3]	3.60555	110
2555	0.907167	0.0928334	1	0.771671	0.991737	0.00112468	[2, 2]	2.82843	110
2556	0.90721	0.0927897	1	0.768127	0.995864	0.00354391	[1, 2]	2.23607	110
2557	0.907654	0.0923456	1	0.732158	0.884712	0.0359694	[2, 3]	3.60555	110
2558	0.907662	0.0923382	1	0.731557	0.996464	0.000600478	[1, 2]	2.23607	110
2559	0.907795	0.0922046	1	0.720731	0.895538	0.0108262	[2, 3]	3.60555	110
2560	0.907994	0.0920064	1	0.704685	0.613986	0.0160467	[3, 3]	4.24264	110
2561	0.908061	0.0919393	1	0.699249	0.956875	0.00543567	[4, 4]	5.65685	110
2562	0.908214	0.0917864	1	0.686859	0.88966	0.0123903	[5, 5]	7.07107	110
2563	0.908229	0.0917712	1	0.685628	0.856189	0.00123081	[6, 4]	7.2111	110
2564	0.908294	0.0917058	1	0.680335	0.927547	0.00529294	[7, 5]	8.60233	110
2565	0.908297	0.0917034	1	0.680137	0.991488	0.000197958	[8, 5]	9.43398	110
2566	0.908342	0.0916583	1	0.676482	0.844112	0.00365484	[9, 5]	10.2956	110
2567	0.908364	0.0916358	1	0.674666	0.993304	0.00181603	[8, 5]	9.43398	110
2568	0.908786	0.0912135	1	0.640456	0.595924	0.0342096	[7, 6]	9.21954	110
2569	0.908857	0.0911426	1	0.63471	0.996288	0.0057462	[6, 5]	7.81025	110
2570	0.90914	0.0908596	1	0.611789	0.912581	0.0229208	[5, 5]	7.07107	110
2571	0.909897	0.0901031	1	0.550517	0.690095	0.0612725	[4, 6]	7.2111	110
2572	0.909996	0.0900035	1	0.542449	0.843307	0.00806776	[5, 7]	8.60233	110
2573	0.910004	0.0899964	1	0.541874	0.974199	0.000574729	[4, 7]	8.06226	110
2574	0.910632	0.0893683	1	0.490993	0.740976	0.0508809	[4, 6]	7.2111	110
2575	0.910698	0.0893016	1	0.48559	0.979602	0.00540337	[4, 7]	8.06226	110
2576	0.910704	0.0892955	1	0.485101	0.992871	0.000488589	[3, 7]	7.61577	110
2577	0.911638	0.0883624	1	0.40952	0.939934	0.0755812	[2, 7]	7.28011	110
2578	0.911655	0.0883446	1	0.408072	0.944699	0.00144838	[3, 6]	6.7082	110
2579	0.91168	0.0883205	1	0.406121	0.995008	0.00195088	[3, 5]	5.83095	110
2580	0.911817	0.0881826	1	0.394956	0.862549	0.0111648	[2, 5]	5.38516	110
2581	0.911917	0.0880826	1	0.386851	0.952804	0.00810482	[3, 6]	6.7082	110
2582	0.911943	0.0880575	1	0.384819	0.941967	0.00203237	[2, 7]	7.28011	110
2583	0.911999	0.0880015	1	0.38028	0.957343	0.00453926	[3, 6]	6.7082	110
2584	0.912007	0.0879931	1	0.379606	0.993545	0.000673901	[3, 7]	7.61577	110
2585	0.912168	0.0878315	1	0.366514	0.970435	0.013092	[3, 6]	6.7082	110
2586	0.912456	0.0875438	1	0.343212	0.965268	0.0233017	[2, 7]	7.28011	110
2587	0.9125	0.0875005	1	0.3397	0.96878	0.00351194	[2, 7]	7.28011	110
2588	0.912511	0.087489	1	0.33877	0.993389	0.000930116	[1, 8]	8.06226	110
2589	0.912519	0.087481	1	0.338126	0.994033	0.000643988	[1, 8]	8.06226	110
2590	0.912535	0.0874654	1	0.336863	0.970044	0.00126332	[2, 7]	7.28011	110
2591	0.912576	0.0874238	1	0.333488	0.97381	0.00337471	[3, 6]	6.7082	110
2592	0.912658	0.0873415	1	0.326824	0.869213	0.00666392	[2, 5]	5.38516	110
2593	0.912661	0.087339	1	0.326621	0.996603	0.000202864	[3, 4]	5	110
2594	0.912807	0.0871933	1	0.314818	0.891809	0.0118034	[2, 4]	4.47214	110
2595	0.912808	0.0871925	1	0.314755	0.895601	6.32112e-05	[2, 3]	3.60555	110
2596	0.912813	0.0871874	1	0.314343	0.997015	0.00041202	[3, 4]	5	110
2597	0.912915	0.0870851	1	0.306052	0.903892	0.00829035	[2, 3]	3.60555	110
2598	0.912916	0.0870837	1	0.305943	0.996574	0.000109485	[1, 2]	2.23607	110
2599	0.912918	0.0870824	1	0.305839	0.889426	0.000103997	[1, 3]	3.16228	110
2600	0.912995	0.0870053	1	0.29959	0.895674	0.00624839	[1, 3]	3.16228	110
2601	0.913094	0.0869065	1	0.291588	0.98358	0.0080021	[1, 4]	4.12311	110
2602	0.913259	0.0867411	1	0.278189	0.99698	0.0133993	[1, 4]	4.12311	110
2603	0.913479	0.0865215	1	0.260403	0.91346	0.0177864	[1, 3]	3.16228	110
2604	0.913492	0.086508	1	0.259307	0.992833	0.00109582	[2, 2]	2.82843	110
2605	0.913532	0.0864684	1	0.256106	0.916662	0.00320113	[1, 3]	3.16228	110
2606	0.913538	0.0864616	1	0.255549	0.99339	0.000557042	[2, 2]	2.82843	110
2607	0.913638	0.0863617	1	0.247462	0.911978	0.00808676	[2, 3]	3.60555	110
2608	0.913638	0.0863616	1	0.247453	0.996582	8.92365e-06	[1, 2]	2.23607	110
2609	0.91365	0.0863501	1	0.246517	0.956918	0.000935629	[1, 0]	1	110
2614	0.913654	0.0863462	1	0.999684	0.995324	0.000315612	[3, 0]	3	112
2615	0.913654	0.0863459	1	0.99966	0.997004	2.46806e-05	[5, 0]	5	112
2616	0.914644	0.0853556	1	0.919451	0.642463	0.0802089	[4, 0]	4	112
2617	0.914647	0.0853528	1	0.919219	0.997236	0.000231619	[5, 0]	5	112
2618	0.914652	0.0853485	1	0.91887	0.997585	0.000349485	[5, 0]	5	112
2619	0.91468	0.0853203	1	0.916591	0.999864	0.00227875	[5, 0]	5	112
2620	0.914721	0.0852793	1	0.913269	0.988329	0.00332227	[5, 1]	5.09902	112
2621	0.91511	0.0848897	1	0.881707	0.961121	0.0315612	[6, 2]	6.32456	112
2622	0.915133	0.0848672	1	0.879892	0.995848	0.0018157	[6, 3]	6.7082	112
2623	0.915279	0.0847208	1	0.868027	0.607789	0.0118651	[7, 4]	8.06226	112
2624	0.915415	0.0845849	1	0.857026	0.61879	0.0110009	[7, 4]	8.06226	112
2625	0.915424	0.0845761	1	0.856306	0.996568	0.000720069	[6, 3]	6.7082	112
2626	0.915839	0.0841607	1	0.822665	0.65243	0.0336405	[7, 4]	8.06226	112
2627	0.915847	0.0841527	1	0.822011	0.997222	0.000653927	[6, 3]	6.7082	112
2628	0.915873	0.0841272	1	0.819946	0.981667	0.00206509	[5, 3]	5.83095	112
2629	0.915879	0.0841212	1	0.819462	0.997707	0.000484659	[6, 3]	6.7082	112
2630	0.915927	0.0840732	1	0.815572	0.65632	0.00388971	[7, 4]	8.06226	112
2631	0.915948	0.0840523	1	0.813879	0.994997	0.00169325	[8, 5]	9.43398	112
2632	0.915975	0.0840251	1	0.811677	0.995747	0.00220163	[7, 5]	8.60233	112
2633	0.915982	0.0840176	1	0.811068	0.881923	0.000608921	[6, 4]	7.2111	112
2634	0.916377	0.0836232	1	0.77912	0.645934	0.0319477	[7, 3]	7.61577	112
2635	0.917147	0.0828531	1	0.716748	0.708306	0.062372	[7, 3]	7.61577	112
2636	0.917586	0.0824141	1	0.681188	0.69188	0.0355601	[7, 4]	8.06226	112
2637	0.917751	0.0822491	1	0.667821	0.973721	0.013367	[8, 4]	8.94427	112
2638	0.918362	0.0816384	1	0.618355	0.741347	0.0494668	[7, 4]	8.06226	112
2639	0.918551	0.0814485	1	0.602974	0.756728	0.0153811	[7, 4]	8.06226	112
2640	0.918565	0.0814355	1	0.601918	0.996802	0.00105509	[7, 5]	8.60233	112
2641	0.918568	0.0814323	1	0.601659	0.995256	0.000259189	[8, 5]	9.43398	112
2642	0.918626	0.0813737	1	0.596912	0.940122	0.0047468	[8, 6]	10	112
2643	0.918627	0.0813726	1	0.596828	0.997099	8.43115e-05	[8, 7]	10.6301	112
2644	0.918671	0.0813286	1	0.593258	0.959439	0.00357032	[9, 8]	12.0416	112
2645	0.918677	0.0813232	1	0.592827	0.986894	0.000431229	[9, 7]	11.4018	112
2646	0.918682	0.0813182	1	0.592416	0.987304	0.000410565	[9, 7]	11.4018	112
2647	0.919103	0.0808975	1	0.558339	0.863912	0.0340765	[8, 8]	11.3137	112
2648	0.919139	0.0808606	1	0.555358	0.922336	0.00298188	[7, 7]	9.89949	112
2649	0.91915	0.08085	1	0.554498	0.864771	0.000859233	[8, 8]	11.3137	112
2650	0.919285	0.0807145	1	0.543521	0.875748	0.010977	[8, 8]	11.3137	112
2651	0.919413	0.0805874	1	0.533224	0.969736	0.0102972	[9, 8]	12.0416	112
2652	0.919419	0.0805813	1	0.532726	0.997597	0.000497776	[8, 7]	10.6301	112
2653	0.919637	0.0803628	1	0.515032	0.94003	0.0176942	[7, 7]	9.89949	112
2654	0.91964	0.0803603	1	0.514829	0.997801	0.000203605	[8, 7]	10.6301	112
2655	0.919778	0.0802221	1	0.503637	0.761912	0.0111911	[7, 8]	10.6301	112
2656	0.919935	0.0800652	1	0.490926	0.972476	0.0127113	[6, 7]	9.21954	112
2657	0.920286	0.0797143	1	0.462503	0.864395	0.0284232	[6, 8]	10	112
2658	0.921128	0.0788718	1	0.394258	0.830156	0.0682445	[7, 8]	10.6301	112
2659	0.921463	0.0785369	1	0.36713	0.857284	0.0271282	[7, 8]	10.6301	112
2660	0.922796	0.0772042	1	0.259183	0.983695	0.107947	[8, 8]	11.3137	112
2661	0.922845	0.0771548	1	0.255186	0.987692	0.00399696	[8, 8]	11.3137	112
2662	0.92288	0.07712	1	0.252364	0.860106	0.00282186	[7, 8]	10.6301	112
2663	0.923532	0.0764683	1	0.199574	0.912896	0.05279	[7, 8]	10.6301	112
2664	0.92359	0.0764102	1	0.194868	0.917603	0.00470662	[7, 8]	10.6301	112
2665	0.923656	0.0763443	1	0.189535	0.869728	0.00533291	[6, 8]	10	112
2666	0.92368	0.0763202	1	0.187582	0.858142	0.00195284	[5, 8]	9.43398	112
2667	0.923748	0.0762524	1	0.182085	0.962415	0.00549674	[4, 7]	8.06226	112
2668	0.923807	0.0761928	1	0.177259	0.862968	0.00482615	[5, 8]	9.43398	112
2669	0.924037	0.0759626	1	0.158617	0.991249	0.0186423	[5, 7]	8.60233	112
2670	0.924141	0.0758591	1	0.150233	0.805777	0.00838426	[4, 6]	7.2111	112
2671	0.924143	0.0758574	1	0.150094	0.996721	0.00013904	[3, 6]	6.7082	112
2672	0.924218	0.0757819	1	0.143979	0.918695	0.00611463	[4, 5]	6.40312	112
2673	0.924284	0.0757159	1	0.138632	0.972531	0.00534697	[3, 4]	5	112
2674	0.924427	0.0755726	1	0.127029	0.858106	0.0116033	[3, 3]	4.24264	112
2675	0.924439	0.0755607	1	0.12606	0.977928	0.000968861	[2, 3]	3.60555	112
2676	0.924609	0.0753906	1	0.112282	0.991706	0.0137779	[2, 3]	3.60555	112
2677	0.924622	0.0753776	1	0.111234	0.927985	0.00104833	[3, 2]	3.60555	112
2678	0.924955	0.0750454	1	0.084324	0.767886	0.0269096	[4, 2]	4.47214	112
2679	0.924981	0.0750193	1	0.0822101	0.990443	0.00211392	[5, 1]	5.09902	112
2680	0.92504	0.0749605	1	0.0774432	0.896576	0.0047669	[6, 0]	6	112
2681	0.92504	0.0749602	1	0.0774205	0.999887	2.2717e-05	[5, 0]	5	112
2682	0.925121	0.0748786	1	0.0708093	0.649074	0.00661121	[4, 0]	4	112
2683	0.925547	0.0744533	1	0.0363603	0.683523	0.034449	[4, 0]	4	112
2684	0.925561	0.0744394	1	0.0352391	0.947842	0.00112118	[3, 1]	3.16228	112
2685	0.925566	0.074434	1	0.0348016	0.995761	0.000437509	[3, 0]	3	112
2686	0.925583	0.0744172	1	0.0334372	0.949207	0.00136447	[3, 1]	3.16228	112
2687	0.925689	0.0743111	1	0.0248475	0.692113	0.00858962	[4, 0]	4	112
2688	0.925907	0.0740934	1	0.00720673	0.709754	0.0176408	[4, 0]	4	112
2689	0.925965	0.0740345	1	0.00244323	0.947039	0.0047635	[2, 0]	2	112
2690	0.925976	0.0740242	1	0.0016052	0.947877	0.000838033	[2, 0]	2	112
2691	0.925983	0.0740173	1	0.00104491	0.988677	0.000560286	[1, 0]	1	112
2692	0.925996	0.0740044	1	0	0.915643	0.00104491	[2, 1]	2.23607	112
2725	0.926061	0.0739389	1	0.994697	0.99398	0.0053028	[1, 0]	1	114
2730	0.926079	0.0739209	1	0.998541	0.973991	0.00145929	[1, 1]	1.41421	116
2731	0.926084	0.073916	1	0.998144	0.998104	0.00039672	[2, 0]	2	116
2732	0.926157	0.073843	1	0.992233	0.955118	0.00591077	[3, 1]	3.16228	116
2733	0.926169	0.0738306	1	0.991224	0.999113	0.00100921	[2, 0]	2	116
2734	0.926292	0.0737077	1	0.981269	0.719709	0.00995519	[1, 0]	1	116
2737	0.926301	0.0736987	1	0.999277	0.974713	0.000722755	[1, 1]	1.41421	117
2738	0.926305	0.0736946	1	0.998939	0.98803	0.000338569	[1, 0]	1	117
2741	0.926308	0.0736921	1	0.999798	0.988232	0.000201784	[1, 0]	1	118
2744	0.926359	0.073641	1	0.99586	0.99188	0.00414043	[2, 0]	2	119
2745	0.926378	0.0736219	1	0.994317	0.993423	0.00154285	[2, 0]	2	119
2746	0.927261	0.0727389	1	0.922796	0.779826	0.0715204	[3, 0]	3	119
2747	0.927266	0.0727342	1	0.922413	0.993806	0.000383755	[2, 0]	2	119
2748	0.927266	0.0727342	1	0.922409	0.999891	3.89864e-06	[4, 0]	4	119
2749	0.927308	0.0726921	1	0.919004	0.991637	0.00340453	[5, 0]	5	119
2750	0.927614	0.0723864	1	0.894238	0.972642	0.0247656	[4, 1]	4.12311	119
2751	0.927699	0.0723008	1	0.887309	0.925625	0.00692935	[5, 2]	5.38516	119
2752	0.927821	0.0721789	1	0.877432	0.872846	0.00987752	[5, 3]	5.83095	119
2753	0.927826	0.0721743	1	0.877064	0.990811	0.000367722	[4, 3]	5	119
2754	0.928244	0.0717563	1	0.843202	0.906708	0.0338619	[5, 3]	5.83095	119
2755	0.928444	0.0715562	1	0.826997	0.922912	0.0162046	[5, 3]	5.83095	119
2756	0.928503	0.0714968	1	0.822183	0.976818	0.00481437	[6, 2]	6.32456	119
2757	0.92852	0.0714801	1	0.820827	0.934807	0.00135552	[7, 2]	7.28011	119
2758	0.928527	0.0714733	1	0.820279	0.768434	0.000548651	[8, 3]	8.544	119
2759	0.928589	0.0714113	1	0.815258	0.886943	0.00502053	[7, 3]	7.61577	119
2760	0.929088	0.0709117	1	0.774787	0.975278	0.0404709	[7, 2]	7.28011	119
2761	0.929133	0.0708667	1	0.771142	0.980464	0.00364547	[6, 2]	6.32456	119
2762	0.92916	0.0708396	1	0.768952	0.989494	0.00218962	[6, 3]	6.7082	119
2763	0.929228	0.0707721	1	0.763479	0.931098	0.00547331	[5, 2]	5.38516	119
2764	0.929248	0.0707519	1	0.761843	0.917279	0.00163615	[4, 2]	4.47214	119
2765	0.929255	0.070745	1	0.761287	0.989167	0.000555653	[5, 1]	5.09902	119
2766	0.929255	0.0707446	1	0.761253	0.999925	3.44425e-05	[4, 0]	4	119
2767	0.929312	0.070688	1	0.756672	0.977223	0.0045807	[4, 1]	4.12311	119
2768	0.92935	0.0706503	1	0.753615	0.977771	0.00305723	[3, 2]	3.60555	119
2769	0.929374	0.0706261	1	0.751653	0.992773	0.0019619	[4, 3]	5	119
2770	0.929646	0.0703545	1	0.729654	0.944912	0.0219993	[5, 3]	5.83095	119
2771	0.92967	0.0703299	1	0.727663	0.994764	0.00199107	[4, 3]	5	119
2772	0.929759	0.0702413	1	0.720488	0.947205	0.00717501	[4, 4]	5.65685	119
2773	0.92996	0.0700397	1	0.704161	0.736035	0.0163262	[4, 5]	6.40312	119
2774	0.929981	0.0700195	1	0.702518	0.964058	0.00164299	[5, 4]	6.40312	119
2775	0.929991	0.0700086	1	0.701636	0.933755	0.000882295	[6, 4]	7.2111	119
2776	0.930418	0.0695823	1	0.667112	0.838851	0.0345241	[7, 4]	8.06226	119
2777	0.930618	0.0693817	1	0.650858	0.903197	0.0162538	[7, 3]	7.61577	119
2778	0.930625	0.0693753	1	0.650343	0.993684	0.000515229	[8, 4]	8.94427	119
2779	0.930832	0.0691675	1	0.633512	0.853294	0.0168306	[9, 5]	10.2956	119
2780	0.930835	0.0691649	1	0.633298	0.974024	0.000213895	[9, 4]	9.84886	119
2781	0.930924	0.0690765	1	0.626135	0.860458	0.00716334	[9, 5]	10.2956	119
2782	0.930928	0.0690718	1	0.625755	0.997102	0.000380106	[9, 6]	10.8167	119
2783	0.93165	0.0683503	1	0.567318	0.837168	0.0584373	[8, 7]	10.6301	119
2784	0.93198	0.0680201	1	0.540569	0.884855	0.0267489	[8, 6]	10	119
2785	0.931985	0.0680154	1	0.540188	0.997482	0.00038077	[9, 6]	10.8167	119
2786	0.931987	0.0680131	1	0.540006	0.995438	0.000182053	[9, 7]	11.4018	119
2787	0.931993	0.0680075	1	0.539547	0.995897	0.000458856	[9, 7]	11.4018	119
2788	0.931997	0.0680026	1	0.539153	0.997876	0.000393773	[9, 6]	10.8167	119
2789	0.931999	0.0680008	1	0.539009	0.996042	0.000144502	[9, 7]	11.4018	119
2790	0.932097	0.0679031	1	0.531089	0.892774	0.00791936	[8, 6]	10	119
2791	0.932098	0.0679023	1	0.531025	0.996105	6.39315e-05	[9, 7]	11.4018	119
2792	0.932108	0.0678922	1	0.530208	0.996923	0.000817228	[9, 7]	11.4018	119
2793	0.932114	0.0678862	1	0.529728	0.997403	0.000480619	[9, 7]	11.4018	119
2794	0.932124	0.0678761	1	0.528907	0.907951	0.000820508	[8, 8]	11.3137	119
2795	0.932835	0.0671654	1	0.47134	0.965518	0.0575668	[8, 8]	11.3137	119
2796	0.933267	0.0667327	1	0.436294	0.879158	0.0350465	[9, 8]	12.0416	119
2797	0.933269	0.0667306	1	0.436121	0.997576	0.000172788	[9, 7]	11.4018	119
2798	0.933622	0.0663781	1	0.407565	0.865724	0.0285563	[8, 7]	10.6301	119
2799	0.933634	0.0663661	1	0.406593	0.982638	0.000971277	[7, 6]	9.21954	119
2800	0.933639	0.066361	1	0.40618	0.987993	0.00041325	[7, 5]	8.60233	119
2801	0.933639	0.0663607	1	0.406156	0.933779	2.37373e-05	[6, 4]	7.2111	119
2802	0.933726	0.0662742	1	0.39915	0.910203	0.00700596	[7, 3]	7.61577	119
2803	0.93375	0.0662503	1	0.397214	0.9824	0.00193618	[6, 2]	6.32456	119
2804	0.933751	0.0662488	1	0.397092	0.989289	0.000122614	[5, 1]	5.09902	119
2805	0.933863	0.0661372	1	0.388054	0.964155	0.00903754	[6, 1]	6.08276	119
2806	0.933864	0.0661365	1	0.387997	0.999171	5.76014e-05	[7, 0]	7	119
2807	0.933864	0.0661364	1	0.387992	0.997805	4.40351e-06	[8, 0]	8	119
2808	0.933972	0.0660279	1	0.379198	0.965237	0.00879372	[9, 0]	9	119
2809	0.934226	0.0657739	1	0.358626	0.82635	0.0205724	[9, 1]	9.05539	119
2810	0.934255	0.0657448	1	0.356272	0.96759	0.00235365	[9, 0]	9	119
2811	0.934354	0.0656459	1	0.348256	0.986589	0.00801624	[9, 2]	9.21954	119
2812	0.934357	0.0656432	1	0.348045	0.9868	0.000210953	[9, 2]	9.21954	119
2813	0.934359	0.0656413	1	0.347886	0.970203	0.000158999	[8, 2]	8.24621	119
2814	0.934363	0.0656373	1	0.347567	0.826669	0.000318981	[9, 1]	9.05539	119
2815	0.934459	0.0655407	1	0.339735	0.975422	0.00783185	[9, 0]	9	119
2816	0.934506	0.0654941	1	0.335965	0.979193	0.00377047	[9, 0]	9	119
2817	0.934658	0.0653416	1	0.323609	0.839024	0.0123556	[9, 1]	9.05539	119
2818	0.934867	0.0651333	1	0.306739	0.956992	0.01687	[8, 1]	8.06226	119
2819	0.934888	0.0651116	1	0.30498	0.971961	0.00175875	[8, 2]	8.24621	119
2820	0.934967	0.0650333	1	0.298642	0.963214	0.00633863	[7, 1]	7.07107	119
2821	0.934967	0.0650329	1	0.298609	0.995794	3.28813e-05	[6, 0]	6	119
2822	0.934985	0.0650148	1	0.297142	0.993104	0.00146744	[5, 0]	5	119
2823	0.935035	0.0649651	1	0.293115	0.981249	0.00402651	[4, 1]	4.12311	119
2824	0.935059	0.0649408	1	0.291145	0.991181	0.0019699	[3, 1]	3.16228	119
2825	0.93506	0.0649402	1	0.291096	0.999974	4.87082e-05	[4, 0]	4	119
2826	0.93506	0.0649402	1	0.291095	0.999975	9.19467e-07	[4, 0]	4	119
2827	0.935063	0.0649368	1	0.29082	0.991457	0.00027536	[3, 1]	3.16228	119
2828	0.935081	0.0649191	1	0.289392	0.995409	0.00142839	[2, 1]	2.23607	119
2829	0.935085	0.0649147	1	0.289035	0.991813	0.000356701	[3, 1]	3.16228	119
2830	0.9351	0.0649003	1	0.287863	0.973648	0.00117178	[2, 2]	2.82843	119
2831	0.935114	0.0648859	1	0.286702	0.929146	0.00116088	[3, 3]	4.24264	119
2832	0.935121	0.0648795	1	0.286181	0.988016	0.000521081	[3, 4]	5	119
2833	0.93518	0.0648199	1	0.28135	0.932378	0.00483113	[2, 4]	4.47214	119
2834	0.935217	0.0647828	1	0.278351	0.932145	0.0029993	[3, 3]	4.24264	119
2835	0.935218	0.0647819	1	0.278276	0.994838	7.43818e-05	[4, 3]	5	119
2836	0.935429	0.0645708	1	0.261176	0.981159	0.0171008	[5, 4]	6.40312	119
2837	0.93543	0.0645702	1	0.261125	0.994889	5.07518e-05	[4, 3]	5	119
2838	0.935514	0.0644857	1	0.254283	0.924121	0.00684232	[4, 2]	4.47214	119
2839	0.935524	0.0644764	1	0.253533	0.995638	0.000749613	[4, 3]	5	119
2840	0.935693	0.0643065	1	0.239769	0.937885	0.0137639	[4, 2]	4.47214	119
2841	0.935694	0.0643062	1	0.239743	0.977797	2.64492e-05	[3, 2]	3.60555	119
2842	0.9357	0.0642997	1	0.239219	0.981773	0.00052343	[4, 1]	4.12311	119
2843	0.9357	0.0642997	1	0.239219	0.999975	5.42051e-07	[4, 0]	4	119
2844	0.936029	0.063971	1	0.212592	0.806453	0.0266269	[3, 0]	3	119
2845	0.936259	0.0637409	1	0.193958	0.825087	0.0186335	[3, 0]	3	119
2846	0.936259	0.0637409	1	0.193955	0.995412	3.70617e-06	[2, 1]	2.23607	119
2847	0.936295	0.0637053	1	0.191072	0.994589	0.00288289	[1, 1]	1.41421	119
2848	0.936311	0.0636887	1	0.189724	0.995937	0.00134786	[1, 1]	1.41421	119
2849	0.936316	0.0636842	1	0.189358	0.995778	0.000365509	[2, 1]	2.23607	119
2850	0.936342	0.0636577	1	0.187219	0.827226	0.00213929	[3, 0]	3	119
2851	0.936345	0.0636548	1	0.186981	0.994045	0.000238427	[2, 0]	2	119
2852	0.936481	0.0635187	1	0.175957	0.880237	0.0110239	[1, 0]	1	119
2855	0.936481	0.0635186	1	0.999995	0.999981	5.22474e-06	[1, 1]	1.41421	120
2856	0.936672	0.0633279	1	0.984549	0.946544	0.0154455	[1, 2]	2.23607	120
2857	0.936699	0.0633009	1	0.982356	0.975841	0.00219332	[2, 2]	2.82843	120
2858	0.93673	0.0632704	1	0.979884	0.980269	0.00247155	[3, 3]	4.24264	120
2859	0.936765	0.0632354	1	0.977052	0.984972	0.00283205	[2, 4]	4.47214	120
2860	0.937513	0.0624872	1	0.916451	0.885741	0.0606012	[3, 5]	5.83095	120
2861	0.937521	0.0624786	1	0.915748	0.922372	0.000702971	[4, 5]	6.40312	120
2862	0.937522	0.0624775	1	0.915663	0.985731	8.52189e-05	[4, 6]	7.2111	120
2863	0.937612	0.0623876	1	0.908383	0.929652	0.00727954	[4, 5]	6.40312	120
2864	0.937657	0.0623431	1	0.90478	0.973339	0.00360313	[4, 4]	5.65685	120
2865	0.937729	0.0622715	1	0.898975	0.979144	0.00580494	[4, 4]	5.65685	120
2866	0.937964	0.0620356	1	0.87987	0.879563	0.0191054	[5, 5]	7.07107	120
2867	0.938095	0.0619053	1	0.869314	0.697048	0.0105563	[5, 4]	6.40312	120
2868	0.938573	0.0614271	1	0.830581	0.88204	0.0387324	[4, 3]	5	120
2869	0.938596	0.0614037	1	0.828682	0.698947	0.0018992	[5, 4]	6.40312	120
2870	0.938651	0.0613488	1	0.824236	0.886486	0.00444623	[4, 3]	5	120
2871	0.938836	0.0611636	1	0.809238	0.713945	0.0149979	[5, 4]	6.40312	120
2872	0.939302	0.0606979	1	0.771516	0.917285	0.0377217	[5, 5]	7.07107	120
2873	0.940296	0.0597044	1	0.691042	0.950202	0.0804737	[5, 6]	7.81025	120
2874	0.940574	0.0594262	1	0.668504	0.952191	0.0225387	[4, 5]	6.40312	120
2875	0.940596	0.0594039	1	0.666701	0.987534	0.0018026	[4, 6]	7.2111	120
2876	0.940762	0.0592375	1	0.653226	0.93076	0.0134753	[5, 5]	7.07107	120
2877	0.940906	0.0590941	1	0.641607	0.990762	0.0116185	[4, 4]	5.65685	120
2878	0.940907	0.0590932	1	0.641532	0.980344	7.534e-05	[3, 3]	4.24264	120
2879	0.940967	0.0590325	1	0.63662	0.989885	0.0049124	[2, 4]	4.47214	120
2880	0.941077	0.0589233	1	0.627771	0.940993	0.00884806	[1, 3]	3.16228	120
2881	0.94108	0.0589197	1	0.627479	0.990178	0.00029298	[2, 4]	4.47214	120
2882	0.941343	0.0586572	1	0.606217	0.962254	0.0212616	[1, 3]	3.16228	120
2883	0.941357	0.0586432	1	0.605084	0.947677	0.00113333	[1, 2]	2.23607	120
2884	0.941362	0.0586385	1	0.604704	0.99377	0.000380063	[2, 3]	3.60555	120
2885	0.941373	0.0586274	1	0.603806	0.976739	0.000897141	[2, 2]	2.82843	120
2886	0.941786	0.0582135	1	0.570283	0.801025	0.0335237	[3, 1]	3.16228	120
2887	0.941802	0.0581976	1	0.568994	0.97501	0.00128912	[4, 2]	4.47214	120
2888	0.942815	0.0571855	1	0.487008	0.88301	0.0819852	[3, 1]	3.16228	120
2889	0.94283	0.05717	1	0.485758	0.997028	0.00124988	[4, 1]	4.12311	120
2890	0.943316	0.0566836	1	0.446356	0.866629	0.0394027	[3, 0]	3	120
2891	0.943333	0.0566671	1	0.445021	0.995379	0.00133427	[2, 0]	2	120
2892	0.943335	0.0566647	1	0.444827	0.999544	0.000194678	[2, 1]	2.23607	120
2893	0.943348	0.0566521	1	0.443807	0.992833	0.00101984	[3, 2]	3.60555	120
2894	0.943348	0.0566521	1	0.443805	0.999546	1.67155e-06	[2, 1]	2.23607	120
2895	0.943348	0.056652	1	0.4438	0.999986	5.57487e-06	[1, 1]	1.41421	120
2898	0.943365	0.0566351	1	0.998629	0.964629	0.00137115	[2, 0]	2	121
2899	0.943427	0.0565726	1	0.99357	0.969214	0.00505882	[2, 1]	2.23607	121
2900	0.943446	0.0565545	1	0.9921	0.991648	0.00147011	[1, 0]	1	121
2901	0.943512	0.056488	1	0.986711	0.970018	0.00538916	[2, 0]	2	121
2902	0.943533	0.0564671	1	0.985021	0.989683	0.00168997	[3, 0]	3	121
2903	0.943536	0.0564636	1	0.984736	0.996221	0.000284319	[3, 1]	3.16228	121
2904	0.943669	0.0563312	1	0.974014	0.984747	0.0107227	[3, 2]	3.60555	121
2905	0.943679	0.0563209	1	0.973175	0.994609	0.000838871	[2, 3]	3.60555	121
2906	0.943734	0.0562656	1	0.968699	0.966731	0.00447629	[1, 3]	3.16228	121
2907	0.94376	0.0562401	1	0.966633	0.885075	0.00206527	[1, 1]	1.41421	121
2908	0.943899	0.0561013	1	0.955393	0.972362	0.0112408	[2, 2]	2.82843	121
2909	0.943956	0.0560442	1	0.950767	0.971356	0.00462545	[1, 3]	3.16228	121
2910	0.943959	0.0560414	1	0.950542	0.994834	0.000225099	[2, 3]	3.60555	121
2911	0.943967	0.0560331	1	0.949864	0.998554	0.000678327	[1, 2]	2.23607	121
2914	0.943969	0.056031	1	0.999836	0.99971	0.000164342	[1, 1]	1.41421	122
2915	0.943985	0.0560145	1	0.998498	0.9921	0.00133749	[1, 0]	1	122
2918	0.944343	0.055657	1	0.971042	0.764993	0.0289578	[3, 0]	3	123
2919	0.94438	0.0556203	1	0.968067	0.992659	0.0029755	[3, 1]	3.16228	123
2920	0.944575	0.0554247	1	0.952222	0.902331	0.0158451	[4, 2]	4.47214	123
2921	0.944576	0.0554239	1	0.952158	0.999234	6.35737e-05	[5, 3]	5.83095	123
2922	0.94458	0.0554201	1	0.951848	0.999544	0.000309837	[5, 3]	5.83095	123
2923	0.944621	0.0553789	1	0.948511	0.951014	0.00333724	[5, 2]	5.38516	123
2924	0.94463	0.0553698	1	0.947777	0.973095	0.000733606	[6, 2]	6.32456	123
2925	0.944638	0.0553623	1	0.94717	0.996246	0.00060725	[7, 1]	7.07107	123
2926	0.94467	0.0553296	1	0.944525	0.954836	0.00264501	[6, 1]	6.08276	123
2927	0.944959	0.0550408	1	0.921127	0.988916	0.0233981	[7, 2]	7.28011	123
2928	0.94496	0.0550405	1	0.9211	0.98756	2.65007e-05	[8, 2]	8.24621	123
2929	0.944963	0.0550372	1	0.920837	0.996509	0.000263394	[7, 1]	7.07107	123
2930	0.944975	0.0550249	1	0.919845	0.988553	0.000992548	[8, 2]	8.24621	123
2931	0.945011	0.0549887	1	0.916911	0.985333	0.00293326	[9, 2]	9.21954	123
2932	0.945019	0.0549812	1	0.916297	0.985947	0.000614039	[9, 2]	9.21954	123
2933	0.945044	0.0549561	1	0.914269	0.986775	0.00202798	[8, 3]	8.544	123
2934	0.946549	0.0534506	1	0.792325	0.835889	0.121944	[7, 3]	7.61577	123
2935	0.94657	0.0534298	1	0.790637	0.994522	0.00168878	[7, 4]	8.06226	123
2936	0.946577	0.0534231	1	0.790098	0.910742	0.000538969	[8, 4]	8.94427	123
2937	0.946595	0.0534054	1	0.788657	0.988215	0.00144025	[8, 3]	8.544	123
2938	0.947006	0.0529943	1	0.755363	0.944037	0.0332949	[8, 4]	8.94427	123
2939	0.94706	0.0529399	1	0.750954	0.954611	0.00440859	[9, 4]	9.84886	123
2940	0.947061	0.0529386	1	0.750847	0.994942	0.000107321	[9, 5]	10.2956	123
2941	0.947074	0.0529265	1	0.749869	0.992227	0.000977709	[9, 6]	10.8167	123
2942	0.947075	0.0529248	1	0.749735	0.992361	0.000134317	[9, 6]	10.8167	123
2943	0.947078	0.052922	1	0.749503	0.995173	0.000231832	[9, 5]	10.2956	123
2944	0.947083	0.0529165	1	0.749061	0.992803	0.000441346	[9, 6]	10.8167	123
2945	0.947256	0.0527441	1	0.735098	0.852815	0.0139639	[9, 7]	11.4018	123
2946	0.947377	0.0526228	1	0.725269	0.943608	0.00982872	[9, 8]	12.0416	123
2947	0.947596	0.0524039	1	0.707539	0.870545	0.0177299	[9, 7]	11.4018	123
2948	0.947617	0.0523832	1	0.70586	0.983452	0.00167922	[8, 6]	10	123
2949	0.947639	0.0523608	1	0.70405	0.872355	0.00181017	[9, 7]	11.4018	123
2950	0.947809	0.0521914	1	0.69033	0.886075	0.0137196	[9, 7]	11.4018	123
2951	0.947824	0.0521763	1	0.689106	0.994027	0.0012241	[9, 6]	10.8167	123
2952	0.947952	0.0520478	1	0.678693	0.979627	0.0104132	[8, 5]	9.43398	123
2953	0.947959	0.0520413	1	0.678169	0.983975	0.000523251	[8, 6]	10	123
2954	0.947962	0.0520384	1	0.677937	0.984208	0.000232729	[8, 6]	10	123
2955	0.947971	0.0520292	1	0.677192	0.995918	0.000744196	[9, 5]	10.2956	123
2956	0.948062	0.0519383	1	0.669826	0.951404	0.00736667	[8, 4]	8.94427	123
2957	0.948154	0.0518461	1	0.662354	0.8741	0.00747173	[7, 5]	8.60233	123
2958	0.948174	0.0518256	1	0.660694	0.985868	0.00166003	[8, 6]	10	123
2959	0.94818	0.0518198	1	0.660228	0.994493	0.000466452	[9, 6]	10.8167	123
2960	0.948228	0.0517722	1	0.656373	0.889929	0.00385411	[9, 7]	11.4018	123
2961	0.94823	0.0517697	1	0.656166	0.994701	0.000207469	[9, 6]	10.8167	123
2962	0.94824	0.0517603	1	0.655407	0.996677	0.00075934	[9, 5]	10.2956	123
2963	0.94835	0.0516501	1	0.646485	0.960326	0.00892183	[8, 4]	8.94427	123
2964	0.948435	0.0515652	1	0.639605	0.842768	0.00687934	[7, 3]	7.61577	123
2965	0.948453	0.051547	1	0.638128	0.989692	0.00147699	[8, 3]	8.544	123
2966	0.948474	0.051526	1	0.636433	0.987642	0.00169537	[9, 2]	9.21954	123
2967	0.948648	0.051352	1	0.62234	0.89433	0.0140932	[9, 3]	9.48683	123
2968	0.948683	0.0513165	1	0.619461	0.991432	0.00287923	[8, 2]	8.24621	123
2969	0.948727	0.0512731	1	0.615942	0.897849	0.00351857	[9, 3]	9.48683	123
2970	0.94874	0.0512598	1	0.614865	0.955688	0.00107714	[9, 4]	9.84886	123
2971	0.948788	0.0512118	1	0.610983	0.95957	0.00388202	[9, 4]	9.84886	123
2972	0.9488	0.0512005	1	0.610063	0.990612	0.00091977	[8, 3]	8.544	123
2973	0.949179	0.0508212	1	0.579343	0.928568	0.0307197	[9, 3]	9.48683	123
2974	0.949192	0.050808	1	0.578271	0.991684	0.00107245	[8, 3]	8.544	123
2975	0.949931	0.0500686	1	0.518383	0.902657	0.0598883	[7, 3]	7.61577	123
2976	0.949953	0.0500473	1	0.516657	0.974821	0.00172522	[6, 2]	6.32456	123
2977	0.949954	0.0500463	1	0.516573	0.999628	8.4292e-05	[5, 3]	5.83095	123
2978	0.949964	0.0500355	1	0.515701	0.987672	0.000872182	[6, 3]	6.7082	123
2979	0.949965	0.0500355	1	0.515699	0.99963	1.64997e-06	[5, 3]	5.83095	123
2980	0.949977	0.0500228	1	0.514667	0.99732	0.00103224	[4, 3]	5	123
2981	0.949994	0.0500055	1	0.513271	0.95241	0.00139628	[5, 2]	5.38516	123
2982	0.95004	0.0499603	1	0.509612	0.97848	0.00365881	[6, 2]	6.32456	123
2983	0.950041	0.0499587	1	0.509477	0.989051	0.000134577	[7, 2]	7.28011	123
2984	0.950048	0.0499515	1	0.508896	0.988253	0.000581029	[6, 3]	6.7082	123
2985	0.950283	0.0497169	1	0.48989	0.951384	0.0190059	[6, 4]	7.2111	123
2986	0.950295	0.0497052	1	0.488944	0.9892	0.000946491	[6, 3]	6.7082	123
2987	0.9507	0.0492996	1	0.456088	0.935513	0.0328564	[7, 3]	7.61577	123
2988	0.950725	0.0492751	1	0.454104	0.993668	0.00198378	[8, 3]	8.544	123
2989	0.950879	0.0491205	1	0.441588	0.941084	0.0125157	[9, 3]	9.48683	123
2990	0.950887	0.0491134	1	0.441012	0.988218	0.000575803	[9, 2]	9.21954	123
2991	0.951033	0.0489672	1	0.429164	0.928509	0.0118479	[9, 1]	9.05539	123
2992	0.951202	0.0487975	1	0.415422	0.942252	0.0137426	[9, 1]	9.05539	123
2993	0.951565	0.0484346	1	0.386023	0.976604	0.0293989	[8, 0]	8	123
2994	0.951603	0.0483975	1	0.383021	0.983345	0.00300146	[7, 0]	7	123
2995	0.951872	0.0481277	1	0.361165	0.906932	0.0218568	[6, 0]	6	123
2996	0.951887	0.0481134	1	0.360008	0.908089	0.00115647	[6, 0]	6	123
2997	0.951898	0.0481017	1	0.359065	0.997164	0.000942998	[5, 1]	5.09902	123
2998	0.951915	0.0480852	1	0.357725	0.979819	0.00133981	[6, 2]	6.32456	123
2999	0.951918	0.048082	1	0.35747	0.99742	0.000255637	[5, 1]	5.09902	123
3000	0.951935	0.0480647	1	0.356064	0.99509	0.00140609	[4, 1]	4.12311	123
3001	0.951943	0.0480567	1	0.355415	0.993307	0.000648228	[3, 1]	3.16228	123
3002	0.952316	0.0476842	1	0.325243	0.775379	0.0301722	[4, 0]	4	123
3003	0.952405	0.0475952	1	0.318038	0.772198	0.00720507	[3, 0]	3	123
3004	0.952441	0.0475586	1	0.315072	0.778345	0.0029661	[4, 0]	4	123
3005	0.953046	0.0469537	1	0.266076	0.821194	0.048996	[3, 0]	3	123
3006	0.953049	0.0469509	1	0.265843	0.998787	0.000232601	[5, 0]	5	123
3007	0.953049	0.0469506	1	0.265819	0.998812	2.46994e-05	[5, 0]	5	123
3008	0.953159	0.0468407	1	0.256924	0.916983	0.00889437	[6, 0]	6	123
3009	0.953189	0.0468106	1	0.254483	0.985787	0.00244156	[7, 0]	7	123
3010	0.953196	0.0468041	1	0.253956	0.999339	0.000527018	[5, 0]	5	123
3011	0.953211	0.046789	1	0.252735	0.779566	0.00122061	[4, 0]	4	123
3012	0.953507	0.046493	1	0.228761	0.845168	0.0239744	[3, 0]	3	123
3013	0.953623	0.0463775	1	0.219398	0.854531	0.00936265	[3, 0]	3	123
3014	0.953637	0.0463631	1	0.218239	0.995619	0.00115914	[2, 0]	2	123
3015	0.953638	0.046362	1	0.218143	0.997672	9.53959e-05	[1, 0]	1	123
3018	0.953667	0.0463332	1	0.997667	0.972351	0.00233349	[1, 1]	1.41421	124
3019	0.953746	0.0462538	1	0.991241	0.978776	0.00642523	[1, 1]	1.41421	124
3020	0.953748	0.0462521	1	0.991104	0.994838	0.000137177	[2, 2]	2.82843	124
3021	0.953756	0.0462438	1	0.990427	0.989966	0.000676942	[1, 2]	2.23607	124
3022	0.953757	0.0462429	1	0.990352	0.999705	7.51246e-05	[1, 3]	3.16228	124
3023	0.954059	0.0459406	1	0.965866	0.879017	0.0244864	[1, 4]	4.12311	124
3024	0.954216	0.0457842	1	0.953202	0.984625	0.0126637	[2, 4]	4.47214	124
3025	0.954438	0.0455617	1	0.935176	0.78646	0.0180256	[1, 5]	5.09902	124
3026	0.954457	0.0455432	1	0.933677	0.976509	0.00149956	[1, 6]	6.08276	124
3027	0.954545	0.0454553	1	0.926563	0.976526	0.00711359	[2, 7]	7.28011	124
3028	0.954558	0.0454421	1	0.925493	0.99317	0.00107042	[1, 7]	7.07107	124
3029	0.95457	0.0454302	1	0.924525	0.994138	0.000968003	[1, 7]	7.07107	124
3030	0.954625	0.0453748	1	0.920036	0.790949	0.00448877	[1, 5]	5.09902	124
3031	0.955239	0.0447606	1	0.87029	0.840694	0.0497457	[1, 5]	5.09902	124
3032	0.955259	0.0447405	1	0.868664	0.978135	0.00162591	[1, 6]	6.08276	124
3033	0.955281	0.0447193	1	0.866948	0.997511	0.00171691	[1, 8]	8.06226	124
3034	0.955284	0.0447162	1	0.866691	0.994395	0.00025683	[1, 7]	7.07107	124
3035	0.955417	0.0445833	1	0.855927	0.851458	0.0107635	[1, 5]	5.09902	124
3036	0.955432	0.044568	1	0.854691	0.852694	0.00123584	[1, 5]	5.09902	124
3037	0.955528	0.0444718	1	0.846893	0.962634	0.00779869	[2, 5]	5.38516	124
3038	0.955544	0.0444558	1	0.845598	0.98592	0.00129499	[2, 4]	4.47214	124
3039	0.955544	0.0444556	1	0.84558	0.999722	1.74693e-05	[1, 3]	3.16228	124
3040	0.955546	0.0444542	1	0.845472	0.986028	0.000108081	[2, 4]	4.47214	124
3041	0.95555	0.04445	1	0.84513	0.938228	0.000342579	[2, 3]	3.60555	124
3042	0.955551	0.0444489	1	0.84504	0.999812	8.92162e-05	[1, 3]	3.16228	124
3043	0.955551	0.0444487	1	0.845024	0.999828	1.6335e-05	[1, 3]	3.16228	124
3044	0.956045	0.0439549	1	0.805024	0.919017	0.0399995	[1, 4]	4.12311	124
3045	0.956086	0.0439145	1	0.801754	0.922288	0.00327073	[1, 4]	4.12311	124
3046	0.956414	0.0435859	1	0.775137	0.964845	0.0266169	[2, 3]	3.60555	124
3047	0.956419	0.0435805	1	0.774702	0.986463	0.000435019	[2, 4]	4.47214	124
3048	0.956427	0.0435729	1	0.774089	0.995135	0.000612611	[3, 4]	5	124
3049	0.957274	0.0427258	1	0.705469	0.848187	0.0686206	[4, 5]	6.40312	124
3050	0.957351	0.0426495	1	0.699287	0.966508	0.00618204	[4, 4]	5.65685	124
3051	0.957351	0.0426488	1	0.699233	0.999764	5.37755e-05	[3, 5]	5.83095	124
3052	0.957361	0.0426389	1	0.698429	0.995938	0.000803519	[3, 4]	5	124
3053	0.957682	0.0423182	1	0.672457	0.874159	0.0259727	[4, 5]	6.40312	124
3054	0.957697	0.0423034	1	0.671254	0.96771	0.00120252	[4, 4]	5.65685	124
3055	0.957705	0.042295	1	0.670578	0.996614	0.000675718	[3, 4]	5	124
3056	0.957751	0.0422486	1	0.666814	0.968609	0.00376462	[2, 3]	3.60555	124
3057	0.957752	0.0422479	1	0.666764	0.996663	4.93237e-05	[3, 4]	5	124
3058	0.957756	0.0422437	1	0.666424	0.997003	0.000340229	[3, 4]	5	124
3059	0.957767	0.0422334	1	0.665583	0.968551	0.000840893	[4, 4]	5.65685	124
3060	0.957898	0.0421021	1	0.654953	0.952882	0.0106304	[5, 5]	7.07107	124
3061	0.958043	0.041957	1	0.643194	0.885918	0.0117585	[4, 5]	6.40312	124
3062	0.958072	0.0419278	1	0.640835	0.993791	0.00235887	[4, 6]	7.2111	124
3063	0.958073	0.0419274	1	0.640799	0.9998	3.6365e-05	[3, 5]	5.83095	124
3064	0.958073	0.0419268	1	0.640747	0.999852	5.18853e-05	[3, 5]	5.83095	124
3065	0.958078	0.0419216	1	0.640332	0.996034	0.000414874	[2, 6]	6.32456	124
3066	0.958239	0.0417613	1	0.627347	0.865679	0.0129851	[1, 5]	5.09902	124
3067	0.958323	0.0416773	1	0.620541	0.969441	0.00680656	[2, 5]	5.38516	124
3068	0.958486	0.041514	1	0.607315	0.935514	0.0132262	[1, 4]	4.12311	124
3069	0.958536	0.0414639	1	0.603257	0.973499	0.00405787	[2, 5]	5.38516	124
3070	0.958642	0.0413581	1	0.594686	0.874249	0.00857055	[1, 5]	5.09902	124
3071	0.958642	0.0413579	1	0.594667	0.999847	1.89394e-05	[1, 3]	3.16228	124
3072	0.958702	0.0412978	1	0.589806	0.879111	0.00486162	[1, 5]	5.09902	124
3073	0.95879	0.04121	1	0.582688	0.980617	0.00711794	[2, 5]	5.38516	124
3074	0.958884	0.0411159	1	0.57507	0.985752	0.00761721	[1, 6]	6.08276	124
3075	0.958886	0.0411145	1	0.574953	0.994513	0.000117476	[1, 7]	7.07107	124
3076	0.959144	0.0408561	1	0.554028	0.917501	0.0209245	[2, 8]	8.24621	124
3077	0.959144	0.0408559	1	0.554009	0.917521	1.98533e-05	[2, 8]	8.24621	124
3078	0.959197	0.0408033	1	0.549747	0.975943	0.00426162	[3, 8]	8.544	124
3079	0.959197	0.0408031	1	0.549735	0.999998	1.17853e-05	[4, 8]	8.94427	124
3080	0.959259	0.0407414	1	0.544736	0.964569	0.0049994	[5, 8]	9.43398	124
3081	0.959259	0.0407414	1	0.544735	0.999999	5.20416e-07	[4, 8]	8.94427	124
3082	0.959259	0.0407414	1	0.544735	0.999999	3.87291e-09	[4, 8]	8.94427	124
3083	0.959386	0.0406144	1	0.534448	0.989915	0.0102874	[4, 7]	8.06226	124
3084	0.959386	0.0406141	1	0.534425	0.889952	2.25977e-05	[5, 7]	8.60233	124
3085	0.959386	0.0406141	1	0.534425	0.999999	2.7247e-07	[4, 8]	8.94427	124
3086	0.959397	0.0406029	1	0.533512	0.890865	0.000913315	[5, 7]	8.60233	124
3087	0.95947	0.0405296	1	0.52758	0.896797	0.00593213	[5, 7]	8.60233	124
3088	0.959476	0.0405241	1	0.527136	0.997245	0.000443553	[6, 7]	9.21954	124
3089	0.959491	0.0405093	1	0.525932	0.998231	0.00120352	[6, 8]	10	124
3090	0.959532	0.040468	1	0.522589	0.967913	0.00334349	[5, 8]	9.43398	124
3091	0.959532	0.040468	1	0.522589	0.999999	1.99985e-07	[4, 8]	8.94427	124
[truncated: 507,393+ more rows]

## Sheet: Trip_data_2D
step	colony state	empty colony state	repeat	exiting crop	trip length
6	0.00819385	0.991806	1	0.336298	5
102	0.0205395	0.97946	1	0	95
134	0.0328852	0.967115	1	0	31
147	0.0452309	0.954769	1	0	12
164	0.0575766	0.942423	1	0	16
177	0.0699222	0.930078	1	0	12
190	0.0822679	0.917732	1	0	12
224	0.0946136	0.905386	1	0	33
252	0.106959	0.893041	1	0	27
258	0.107497	0.892503	1	0.956406	5
266	0.114669	0.885331	1	0.419084	7
293	0.127015	0.872985	1	0	26
324	0.139361	0.860639	1	0	30
328	0.150139	0.849861	1	0.126988	3
330	0.150139	0.849861	1	1	1
332	0.150139	0.849861	1	1	1
352	0.162484	0.837516	1	0	19
354	0.162484	0.837516	1	1	1
362	0.165565	0.834435	1	0.750457	7
366	0.166845	0.833155	1	0.896348	3
370	0.167937	0.832063	1	0.911498	3
373	0.170494	0.829506	1	0.79289	2
396	0.18284	0.81716	1	0	22
419	0.195186	0.804814	1	0	22
429	0.202165	0.797835	1	0.434677	9
444	0.214511	0.785489	1	0	14
448	0.216051	0.783949	1	0.875232	3
505	0.228397	0.771603	1	0	56
515	0.240742	0.759258	1	0	9
520	0.243775	0.756225	1	0.754323	4
533	0.256121	0.743879	1	0	12
551	0.268467	0.731533	1	0	17
575	0.280812	0.719188	1	0	23
578	0.282949	0.717051	1	0.826912	2
580	0.282949	0.717051	1	1	1
592	0.295295	0.704705	1	0	11
602	0.302582	0.697418	1	0.409769	9
647	0.314927	0.685073	1	0	44
664	0.327273	0.672727	1	0	16
685	0.339619	0.660381	1	0	20
700	0.351519	0.648481	1	0.0361061	14
702	0.351519	0.648481	1	1	1
741	0.363864	0.636136	1	0	38
743	0.363864	0.636136	1	1	1
757	0.374304	0.625696	1	0.154408	13
793	0.386649	0.613351	1	0	35
797	0.387445	0.612555	1	0.935598	3
827	0.39979	0.60021	1	0	29
848	0.412136	0.587864	1	0	20
851	0.413886	0.586114	1	0.858275	2
853	0.413886	0.586114	1	1	1
873	0.426231	0.573769	1	0	19
893	0.438577	0.561423	1	0	19
895	0.438577	0.561423	1	1	1
928	0.450923	0.549077	1	0	32
931	0.4516	0.5484	1	0.945152	2
958	0.463945	0.536055	1	0	26
975	0.471093	0.528907	1	0.421078	16
991	0.482217	0.517783	1	0.0989028	15
1002	0.494563	0.505437	1	0	10
1022	0.502891	0.497109	1	0.325416	19
1045	0.515237	0.484763	1	0	22
1047	0.515237	0.484763	1	1	1
1049	0.515237	0.484763	1	1	1
1053	0.518509	0.481491	1	0.734964	3
1065	0.524255	0.475745	1	0.534593	11
1089	0.5366	0.4634	1	0	23
1133	0.548946	0.451054	1	0	43
1138	0.557169	0.442831	1	0.333915	4
1152	0.565133	0.434867	1	0.354921	13
1206	0.577479	0.422521	1	0	53
1209	0.57758	0.42242	1	0.991784	2
1231	0.589926	0.410074	1	0	21
1251	0.602272	0.397728	1	0	19
1253	0.602272	0.397728	1	1	1
1255	0.602272	0.397728	1	1	1
1307	0.614617	0.385383	1	0	51
1356	0.626963	0.373037	1	0	48
1410	0.639309	0.360691	1	0	53
1454	0.651654	0.348346	1	0	43
1496	0.664	0.336	1	0	41
1580	0.676346	0.323654	1	0	83
1598	0.680064	0.319936	1	0.698856	17
1620	0.692409	0.307591	1	0	21
1657	0.704755	0.295245	1	0	36
1669	0.712752	0.287248	1	0.352227	11
1690	0.725098	0.274902	1	0	20
1748	0.737443	0.262557	1	0	57
1750	0.737443	0.262557	1	1	1
1754	0.737593	0.262407	1	0.98785	3
1792	0.749939	0.250061	1	0	37
1826	0.760429	0.239571	1	0.150301	33
1833	0.764058	0.235942	1	0.706112	6
1871	0.776403	0.223597	1	0	37
1910	0.788749	0.211251	1	0	38
1973	0.801095	0.198905	1	0	62
1975	0.801095	0.198905	1	1	1
2015	0.81277	0.18723	1	0.0542829	39
2064	0.824441	0.175559	1	0.0546679	48
2114	0.836787	0.163213	1	0	49
2199	0.849132	0.150868	1	0	84
2272	0.861478	0.138522	1	0	72
2280	0.862357	0.137643	1	0.928781	7
2347	0.873462	0.126538	1	0.10052	66
2400	0.882631	0.117369	1	0.257271	52
2402	0.882631	0.117369	1	1	1
2404	0.882631	0.117369	1	1	1
2474	0.893646	0.106354	1	0.107782	69
2547	0.904348	0.0956523	1	0.133192	72
2610	0.91365	0.0863501	1	0.246517	62
2612	0.91365	0.0863501	1	1	1
2721	0.925996	0.0740044	1	0	108
2723	0.925996	0.0740044	1	1	1
2726	0.926061	0.0739389	1	0.994697	2
2728	0.926061	0.0739389	1	1	1
2735	0.926292	0.0737077	1	0.981269	6
2739	0.926305	0.0736946	1	0.998939	3
2742	0.926308	0.0736921	1	0.999798	2
2853	0.936481	0.0635187	1	0.175957	110
2896	0.943348	0.056652	1	0.4438	42
2912	0.943967	0.0560331	1	0.949864	15
2916	0.943985	0.0560145	1	0.998498	3
3016	0.953638	0.046362	1	0.218143	99
3176	0.964922	0.0350776	1	0.085966	159
3338	0.973043	0.0269567	1	0.342209	161
3342	0.973045	0.0269547	1	0.999836	3
3553	0.98111	0.01889	1	0.346757	210
3882	0.988222	0.0117779	1	0.423922	328
5	0.00215747	0.997843	2	0.825245	4
7	0.00215747	0.997843	2	1	1
37	0.0145031	0.985497	2	0	29
39	0.0145031	0.985497	2	1	1
41	0.0145031	0.985497	2	1	1
91	0.0268488	0.973151	2	0	49
98	0.0379838	0.962016	2	0.098065	6
115	0.0503295	0.94967	2	0	16
117	0.0503295	0.94967	2	1	1
134	0.0626752	0.937325	2	0	16
206	0.0750209	0.924979	2	0	71
216	0.0873665	0.912633	2	0	9
249	0.0997122	0.900288	2	0	32
252	0.101613	0.898387	2	0.846076	2
267	0.113958	0.886042	2	0	14
278	0.126304	0.873696	2	0	10
283	0.128187	0.871813	2	0.847451	4
285	0.128187	0.871813	2	1	1
302	0.140533	0.859467	2	0	16
321	0.152879	0.847121	2	0	18
347	0.165224	0.834776	2	0	25
349	0.165224	0.834776	2	1	1
351	0.165224	0.834776	2	1	1
354	0.169873	0.830127	2	0.62347	2
356	0.169873	0.830127	2	1	1
358	0.169873	0.830127	2	1	1
360	0.169873	0.830127	2	1	1
370	0.173355	0.826645	2	0.71795	9
414	0.185701	0.814299	2	0	43
477	0.198046	0.801954	2	0	62
479	0.198046	0.801954	2	1	1
492	0.210392	0.789608	2	0	12
494	0.210392	0.789608	2	1	1
503	0.222738	0.777262	2	0	8
572	0.235083	0.764917	2	0	68
585	0.247429	0.752571	2	0	12
587	0.247429	0.752571	2	1	1
589	0.247429	0.752571	2	1	1
653	0.259775	0.740225	2	0	63
744	0.27212	0.72788	2	0	90
779	0.284466	0.715534	2	0	34
781	0.284466	0.715534	2	1	1
783	0.284466	0.715534	2	1	1
786	0.284589	0.715411	2	0.990021	2
804	0.296935	0.703065	2	0	17
807	0.297479	0.702521	2	0.955943	2
809	0.297479	0.702521	2	1	1
812	0.299667	0.700333	2	0.822785	2
863	0.312012	0.687988	2	0	50
865	0.312012	0.687988	2	1	1
867	0.312012	0.687988	2	1	1
877	0.324358	0.675642	2	0	9
886	0.333218	0.666782	2	0.282344	8
899	0.345564	0.654436	2	0	12
903	0.34902	0.65098	2	0.720054	3
907	0.353004	0.646996	2	0.677309	3
910	0.355475	0.644525	2	0.799783	2
912	0.355475	0.644525	2	1	1
967	0.367821	0.632179	2	0	54
989	0.380167	0.619833	2	0	21
996	0.387143	0.612857	2	0.434927	6
999	0.387308	0.612692	2	0.986633	2
1006	0.395311	0.604689	2	0.351727	6
1008	0.395311	0.604689	2	1	1
1010	0.395311	0.604689	2	1	1
1012	0.395311	0.604689	2	1	1
1034	0.407657	0.592343	2	0	21
1036	0.407657	0.592343	2	1	1
1075	0.420003	0.579997	2	0	38
1077	0.420003	0.579997	2	1	1
1087	0.432348	0.567652	2	0	9
1123	0.444694	0.555306	2	0	35
1127	0.444854	0.555146	2	0.987028	3
1174	0.4572	0.5428	2	0	46
1203	0.469546	0.530454	2	0	28
1289	0.481891	0.518109	2	0	85
1309	0.494237	0.505763	2	0	19
1317	0.505774	0.494226	2	0.0655158	7
1355	0.518119	0.481881	2	0	37
1357	0.518119	0.481881	2	1	1
1480	0.530465	0.469535	2	0	122
1482	0.530465	0.469535	2	1	1
1517	0.542811	0.457189	2	0	34
1519	0.542811	0.457189	2	1	1
1587	0.555156	0.444844	2	0	67
1600	0.565893	0.434107	2	0.13035	12
1650	0.578239	0.421761	2	0	49
1675	0.590584	0.409416	2	0	24
1679	0.591312	0.408688	2	0.941014	3
1709	0.603658	0.396342	2	0	29
1773	0.616004	0.383996	2	0	63
1783	0.622239	0.377761	2	0.494955	9
1797	0.630933	0.369067	2	0.295778	13
1817	0.643279	0.356721	2	0	19
1856	0.655624	0.344376	2	0	38
1874	0.665457	0.334543	2	0.203568	17
1910	0.677803	0.322197	2	0	35
1936	0.687823	0.312177	2	0.188384	25
1949	0.692513	0.307487	2	0.620073	12
1976	0.704859	0.295141	2	0	26
2014	0.717204	0.282796	2	0	37
2016	0.717204	0.282796	2	1	1
2132	0.72955	0.27045	2	0	115
2146	0.734175	0.265825	2	0.625395	13
2160	0.743599	0.256401	2	0.23667	13
2174	0.749549	0.250451	2	0.518012	13
2180	0.74997	0.25003	2	0.965941	5
2182	0.74997	0.25003	2	1	1
2201	0.756716	0.243284	2	0.453519	18
2382	0.769062	0.230938	2	0	180
2384	0.769062	0.230938	2	1	1
2449	0.781408	0.218592	2	0	64
2456	0.782903	0.217097	2	0.878856	6
2483	0.790309	0.209691	2	0.400135	26
2485	0.790309	0.209691	2	1	1
2533	0.802655	0.197345	2	0	47
2538	0.80492	0.19508	2	0.816517	4
2585	0.817266	0.182734	2	0	46
2587	0.817266	0.182734	2	1	1
2590	0.817409	0.182591	2	0.988388	2
2602	0.821023	0.178977	2	0.707276	11
2611	0.82491	0.17509	2	0.68514	8
2614	0.82492	0.17508	2	0.999198	2
2617	0.824949	0.175051	2	0.997614	2
2714	0.837295	0.162705	2	0	96
2721	0.838363	0.161637	2	0.913498	6
2788	0.850709	0.149291	2	0	66
2793	0.851073	0.148927	2	0.970515	4
2886	0.863313	0.136687	2	0.00854145	92
3053	0.875658	0.124342	2	0	166
3111	0.885109	0.114891	2	0.234507	57
3113	0.885109	0.114891	2	1	1
3227	0.897455	0.102545	2	0	113
3294	0.909641	0.0903594	2	0.0129394	66
3396	0.919869	0.0801312	2	0.171516	101
3473	0.928157	0.0718428	2	0.328642	76
3634	0.940503	0.0594971	2	0	160
3636	0.940503	0.0594971	2	1	1
3763	0.950486	0.0495139	2	0.191361	126
3768	0.950576	0.0494241	2	0.99272	4
3770	0.950576	0.0494241	2	1	1
3772	0.950576	0.0494241	2	1	1
3782	0.951438	0.0485625	2	0.930211	9
3810	0.958572	0.0414279	2	0.422103	27
3814	0.95867	0.0413301	2	0.992072	3
3817	0.958696	0.0413042	2	0.997909	2
3822	0.958709	0.0412908	2	0.99891	4
3984	0.967486	0.0325143	2	0.289101	161
3986	0.967486	0.0325143	2	1	1
24	0.0123457	0.987654	3	0	23
28	0.017919	0.982081	3	0.548562	3
60	0.0302647	0.969735	3	0	31
64	0.0366462	0.963354	3	0.483095	3
139	0.0489919	0.951008	3	0	74
147	0.0563169	0.943683	3	0.406673	7
164	0.0686626	0.931337	3	0	16
166	0.0686626	0.931337	3	1	1
201	0.0810083	0.918992	3	0	34
203	0.0810083	0.918992	3	1	1
226	0.093354	0.906646	3	0	22
228	0.093354	0.906646	3	1	1
238	0.1057	0.8943	3	0	9
245	0.113482	0.886518	3	0.369594	6
254	0.125828	0.874172	3	0	8
256	0.125828	0.874172	3	1	1
276	0.138174	0.861826	3	0	19
293	0.150519	0.849481	3	0	16
356	0.162865	0.837135	3	0	62
358	0.162865	0.837135	3	1	1
382	0.175211	0.824789	3	0	23
388	0.182265	0.817735	3	0.428648	5
395	0.192781	0.807219	3	0.148145	6
426	0.205127	0.794873	3	0	30
430	0.207176	0.792824	3	0.834047	3
434	0.208041	0.791959	3	0.92992	3
455	0.220387	0.779613	3	0	20
478	0.232732	0.767268	3	0	22
492	0.245078	0.754922	3	0	13
518	0.257424	0.742576	3	0	25
530	0.269769	0.730231	3	0	11
532	0.269769	0.730231	3	1	1
549	0.282115	0.717885	3	0	16
578	0.294461	0.705539	3	0	28
580	0.294461	0.705539	3	1	1
622	0.306806	0.693194	3	0	41
625	0.30798	0.69202	3	0.904909	2
627	0.30798	0.69202	3	1	1
629	0.30798	0.69202	3	1	1
700	0.320326	0.679674	3	0	70
710	0.33184	0.66816	3	0.0673933	9
732	0.344185	0.655815	3	0	21
737	0.351855	0.648145	3	0.378743	4
795	0.364201	0.635799	3	0	57
841	0.376547	0.623453	3	0	45
861	0.388892	0.611108	3	0	19
952	0.401238	0.598762	3	0	90
970	0.413584	0.586416	3	0	17
976	0.41947	0.58053	3	0.523215	5
988	0.431815	0.568185	3	0	11
990	0.431815	0.568185	3	1	1
1017	0.444161	0.555839	3	0	26
1035	0.456507	0.543493	3	0	17
1058	0.468853	0.531147	3	0	22
1074	0.481198	0.518802	3	0	15
1142	0.493544	0.506456	3	0	67
1163	0.50589	0.49411	3	0	20
1262	0.518235	0.481765	3	0	98
1264	0.518235	0.481765	3	1	1
1266	0.518235	0.481765	3	1	1
1293	0.526756	0.473244	3	0.309859	26
1295	0.526756	0.473244	3	1	1
1297	0.526756	0.473244	3	1	1
1299	0.526756	0.473244	3	1	1
1306	0.532973	0.467027	3	0.496385	6
1358	0.545319	0.454681	3	0	51
1372	0.553256	0.446744	3	0.357075	13
1388	0.565602	0.434398	3	0	15
1391	0.567376	0.432624	3	0.856279	2
1463	0.579722	0.420278	3	0	71
1465	0.579722	0.420278	3	1	1
1493	0.592067	0.407933	3	0	27
1607	0.604413	0.395587	3	0	113
1657	0.616759	0.383241	3	0	49
1664	0.617563	0.382437	3	0.934835	6
1688	0.629909	0.370091	3	0	23
1716	0.640342	0.359658	3	0.154884	27
1752	0.652079	0.347921	3	0.0493772	35
1784	0.664424	0.335576	3	0	31
1805	0.670989	0.329011	3	0.468227	20
1833	0.680159	0.319841	3	0.25729	27
1835	0.680159	0.319841	3	1	1
1903	0.692504	0.307496	3	0	67
1906	0.692902	0.307098	3	0.967777	2
1928	0.705248	0.294752	3	0	21
1955	0.716307	0.283693	3	0.104171	26
2004	0.728653	0.271347	3	0	48
2019	0.740999	0.259001	3	0	14
2021	0.740999	0.259001	3	1	1
2068	0.753344	0.246656	3	0	46
2117	0.76569	0.23431	3	0	48
2150	0.77754	0.22246	3	0.0401561	32
2152	0.77754	0.22246	3	1	1
2243	0.789886	0.210114	3	0	90
2319	0.802231	0.197769	3	0	75
2322	0.802547	0.197453	3	0.974446	2
2369	0.814893	0.185107	3	0	46
2433	0.827238	0.172762	3	0	63
2502	0.839584	0.160416	3	0	68
2504	0.839584	0.160416	3	1	1
2555	0.85193	0.14807	3	0	50
2559	0.85214	0.14786	3	0.982946	3
2567	0.852783	0.147217	3	0.947934	7
2569	0.852783	0.147217	3	1	1
2627	0.865129	0.134871	3	0	57
2629	0.865129	0.134871	3	1	1
2639	0.866492	0.133508	3	0.889522	9
2655	0.868434	0.131566	3	0.842699	15
2723	0.88078	0.11922	3	0	67
2744	0.883269	0.116731	3	0.798417	20
2747	0.88336	0.11664	3	0.992649	2
2829	0.895705	0.104295	3	0	81
2831	0.895705	0.104295	3	1	1
2882	0.90572	0.0942801	3	0.188815	50
2934	0.913827	0.0861734	3	0.343359	51
3020	0.923307	0.0766932	3	0.232098	85
3022	0.923307	0.0766932	3	1	1
3091	0.932323	0.067677	3	0.269693	68
3182	0.94252	0.05748	3	0.174037	90
3324	0.954866	0.0451343	3	0	141
3326	0.954866	0.0451343	3	1	1
3482	0.961101	0.0388994	3	0.494978	155
3737	0.968854	0.0311457	3	0.371951	254
3819	0.976136	0.0238645	3	0.410218	81
3949	0.98371	0.0162903	3	0.386493	129
17	0.0123457	0.987654	4	0	16
55	0.0246914	0.975309	4	0	37
81	0.037037	0.962963	4	0	25
86	0.0493827	0.950617	4	0	4
113	0.0617284	0.938272	4	0	26
142	0.0740741	0.925926	4	0	28
172	0.0864198	0.91358	4	0	29
181	0.090863	0.909137	4	0.640093	8
209	0.103209	0.896791	4	0	27
220	0.111156	0.888844	4	0.356311	10
222	0.111156	0.888844	4	1	1
234	0.123501	0.876499	4	0	11
242	0.127296	0.872704	4	0.692615	7
333	0.139642	0.860358	4	0	90
335	0.139642	0.860358	4	1	1
344	0.149214	0.850786	4	0.224671	8
346	0.149214	0.850786	4	1	1
348	0.149214	0.850786	4	1	1
350	0.149214	0.850786	4	1	1
365	0.155189	0.844811	4	0.51596	14
429	0.167535	0.832465	4	0	63
485	0.179881	0.820119	4	0	55
552	0.192227	0.807773	4	0	66
554	0.192227	0.807773	4	1	1
559	0.197614	0.802386	4	0.563589	4
581	0.20996	0.79004	4	0	21
586	0.212273	0.787727	4	0.812658	4
589	0.212456	0.787544	4	0.985184	2
609	0.224801	0.775199	4	0	19
623	0.237147	0.762853	4	0	13
629	0.247685	0.752315	4	0.146429	5
662	0.260031	0.739969	4	0	32
686	0.272376	0.727624	4	0	23
688	0.272376	0.727624	4	1	1
698	0.283778	0.716222	4	0.076478	9
701	0.286331	0.713669	4	0.793224	2
704	0.288682	0.711318	4	0.809548	2
706	0.288682	0.711318	4	1	1
744	0.301028	0.698972	4	0	37
747	0.301642	0.698358	4	0.950219	2
763	0.31359	0.68641	4	0.0322675	15
781	0.325935	0.674065	4	0	17
783	0.325935	0.674065	4	1	1
795	0.338281	0.661719	4	0	11
799	0.34059	0.65941	4	0.81295	3
890	0.352936	0.647064	4	0	90
923	0.365282	0.634718	4	0	32
977	0.377627	0.622373	4	0	53
987	0.389973	0.610027	4	0	9
997	0.402319	0.597681	4	0	9
999	0.402319	0.597681	4	1	1
1001	0.402319	0.597681	4	1	1
1003	0.402319	0.597681	4	1	1
1006	0.40359	0.59641	4	0.896993	2
1010	0.405548	0.594452	4	0.841444	3
1037	0.417893	0.582107	4	0	26
1039	0.417893	0.582107	4	1	1
1063	0.430239	0.569761	4	0	23
1082	0.442585	0.557415	4	0	18
1101	0.45493	0.54507	4	0	18
1134	0.467276	0.532724	4	0	32
1154	0.479622	0.520378	4	0	19
1166	0.491967	0.508033	4	0	11
1201	0.504313	0.495687	4	0	34
1251	0.516659	0.483341	4	0	49
1274	0.529005	0.470995	4	0	22
1322	0.54135	0.45865	4	0	47
1327	0.544583	0.455417	4	0.738167	4
1349	0.5546	0.4454	4	0.188601	21
1357	0.558163	0.441837	4	0.71136	7
1361	0.559291	0.440709	4	0.908648	3
1385	0.571637	0.428363	4	0	23
1387	0.571637	0.428363	4	1	1
1389	0.571637	0.428363	4	1	1
1426	0.583983	0.416017	4	0	36
1457	0.596328	0.403672	4	0	30
1473	0.605471	0.394529	4	0.259455	15
1476	0.605632	0.394368	4	0.986961	2
1535	0.617977	0.382023	4	0	58
1603	0.630323	0.369677	4	0	67
1619	0.638152	0.361848	4	0.365845	15
1657	0.650498	0.349502	4	0	37
1668	0.655394	0.344606	4	0.60345	10
1670	0.655394	0.344606	4	1	1
1673	0.656253	0.343747	4	0.930383	2
1688	0.660847	0.339153	4	0.627918	14
1733	0.673192	0.326808	4	0	44
1735	0.673192	0.326808	4	1	1
1737	0.673192	0.326808	4	1	1
1760	0.685538	0.314462	4	0	22
1762	0.685538	0.314462	4	1	1
1776	0.685971	0.314029	4	0.964951	13
1813	0.698316	0.301684	4	0	36
1840	0.70544	0.29456	4	0.42299	26
1865	0.717786	0.282214	4	0	24
1869	0.71818	0.28182	4	0.968092	3
1874	0.718773	0.281227	4	0.951948	4
1881	0.719626	0.280374	4	0.93093	6
1907	0.728286	0.271714	4	0.298483	25
1909	0.728286	0.271714	4	1	1
1956	0.740632	0.259368	4	0	46
1959	0.740731	0.259269	4	0.991949	2
2019	0.753077	0.246923	4	0	59
2037	0.760818	0.239182	4	0.372944	17
2048	0.767341	0.232659	4	0.471648	10
2093	0.779687	0.220313	4	0	44
2189	0.792033	0.207967	4	0	95
2191	0.792033	0.207967	4	1	1
2193	0.792033	0.207967	4	1	1
2255	0.804378	0.195622	4	0	61
2330	0.816724	0.183276	4	0	74
2358	0.828333	0.171667	4	0.0597112	27
2360	0.828333	0.171667	4	1	1
2413	0.840678	0.159322	4	0	52
2515	0.853024	0.146976	4	0	101
2518	0.853232	0.146768	4	0.983153	2
2582	0.865578	0.134422	4	0	63
2659	0.877923	0.122077	4	0	76
2664	0.880068	0.119932	4	0.826283	4
2709	0.888445	0.111555	4	0.321416	44
2713	0.89007	0.10993	4	0.868401	3
2715	0.89007	0.10993	4	1	1
2835	0.902416	0.0975842	4	0	119
2939	0.914761	0.0852385	4	0	103
2972	0.918619	0.081381	4	0.68754	32
2974	0.918619	0.081381	4	1	1
2976	0.918619	0.081381	4	1	1
3100	0.929563	0.0704371	4	0.113542	123
3202	0.937741	0.0622585	4	0.337539	101
3207	0.938103	0.0618974	4	0.970752	4
3304	0.944515	0.0554847	4	0.480569	96
3307	0.94456	0.0554396	4	0.996348	2
3309	0.94456	0.0554396	4	1	1
3311	0.94456	0.0554396	4	1	1
3314	0.94456	0.0554396	4	1	2
3469	0.954829	0.0451713	4	0.168263	154
3491	0.95772	0.0422803	4	0.765833	21
3699	0.968025	0.0319752	4	0.165285	207
3996	0.98037	0.0196295	4	0	296
13	0.0123457	0.987654	5	0	12
16	0.0152797	0.98472	5	0.762343	2
24	0.0276254	0.972375	5	0	7
35	0.0399711	0.960029	5	0	10
48	0.0523168	0.947683	5	0	12
51	0.052527	0.947473	5	0.982968	2
53	0.052527	0.947473	5	1	1
77	0.0648727	0.935127	5	0	23
87	0.0772184	0.922782	5	0	9
108	0.0895641	0.910436	5	0	20
119	0.10191	0.89809	5	0	10
139	0.114255	0.885745	5	0	19
159	0.126601	0.873399	5	0	19
169	0.138947	0.861053	5	0	9
212	0.151292	0.848708	5	0	42
232	0.163638	0.836362	5	0	19
241	0.17212	0.82788	5	0.31297	8
291	0.184466	0.815534	5	0	49
304	0.195978	0.804022	5	0.0675088	12
311	0.200298	0.799702	5	0.650077	6
314	0.200718	0.799282	5	0.965948	2
330	0.211431	0.788569	5	0.132309	15
332	0.211431	0.788569	5	1	1
339	0.220262	0.779738	5	0.284669	6
366	0.232607	0.767393	5	0	26
371	0.237027	0.762973	5	0.641999	4
381	0.249373	0.750627	5	0	9
386	0.25002	0.74998	5	0.947562	4
391	0.252286	0.747714	5	0.816483	4
415	0.264632	0.735368	5	0	23
417	0.264632	0.735368	5	1	1
419	0.264632	0.735368	5	1	1
422	0.264875	0.735125	5	0.980269	2
457	0.277221	0.722779	5	0	34
503	0.289567	0.710433	5	0	45
509	0.297758	0.702242	5	0.336469	5
544	0.310104	0.689896	5	0	34
547	0.311688	0.688312	5	0.871729	2
549	0.311688	0.688312	5	1	1
575	0.324033	0.675967	5	0	25
578	0.324116	0.675884	5	0.993316	2
601	0.336461	0.663539	5	0	22
651	0.348807	0.651193	5	0	49
653	0.348807	0.651193	5	1	1
683	0.361153	0.638847	5	0	29
727	0.373499	0.626501	5	0	43
730	0.373588	0.626412	5	0.992754	2
738	0.3807	0.6193	5	0.423929	7
792	0.393046	0.606954	5	0	53
797	0.399477	0.600523	5	0.479091	4
836	0.411822	0.588178	5	0	38
838	0.411822	0.588178	5	1	1
840	0.411822	0.588178	5	1	1
842	0.411822	0.588178	5	1	1
853	0.420232	0.579768	5	0.318782	10
867	0.432578	0.567422	5	0	13
901	0.444924	0.555076	5	0	33
938	0.457269	0.542731	5	0	36
952	0.469615	0.530385	5	0	13
955	0.469752	0.530248	5	0.988911	2
961	0.470717	0.529283	5	0.921819	5
1018	0.483063	0.516937	5	0	56
1031	0.495409	0.504591	5	0	12
1065	0.507754	0.492246	5	0	33
1100	0.5201	0.4799	5	0	34
1102	0.5201	0.4799	5	1	1
1130	0.532446	0.467554	5	0	27
1140	0.535627	0.464373	5	0.742274	9
1145	0.535928	0.464072	5	0.975666	4
1151	0.538472	0.461528	5	0.793923	5
1155	0.540339	0.459661	5	0.848764	3
1157	0.540339	0.459661	5	1	1
1175	0.552685	0.447315	5	0	17
1222	0.56503	0.43497	5	0	46
1260	0.577376	0.422624	5	0	37
1264	0.577831	0.422169	5	0.963163	3
1310	0.590177	0.409823	5	0	45
1365	0.602522	0.397478	5	0	54
1367	0.602522	0.397478	5	1	1
1423	0.614868	0.385132	5	0	55
1462	0.627214	0.372786	5	0	38
1487	0.63664	0.36336	5	0.236501	24
1527	0.648985	0.351015	5	0	39
1598	0.661331	0.338669	5	0	70
1602	0.662296	0.337704	5	0.921845	3
1627	0.674316	0.325684	5	0.0263839	24
1629	0.674316	0.325684	5	1	1
1631	0.674316	0.325684	5	1	1
1647	0.686661	0.313339	5	0	15
1669	0.699007	0.300993	5	0	21
1722	0.711353	0.288647	5	0	52
1724	0.711353	0.288647	5	1	1
1748	0.723371	0.276629	5	0.0265259	23
1803	0.735717	0.264283	5	0	54
1853	0.748062	0.251938	5	0	49
1856	0.748109	0.251891	5	0.996206	2
1885	0.760238	0.239762	5	0.0175687	28
1889	0.760505	0.239495	5	0.978347	3
1919	0.768634	0.231366	5	0.341594	29
1955	0.780979	0.219021	5	0	35
1957	0.780979	0.219021	5	1	1
1963	0.78256	0.21744	5	0.871957	5
1965	0.78256	0.21744	5	1	1
2019	0.794906	0.205094	5	0	53
2069	0.807252	0.192748	5	0	49
2102	0.819597	0.180403	5	0	32
2150	0.831943	0.168057	5	0	47
2206	0.843749	0.156251	5	0.0437185	55
2208	0.843749	0.156251	5	1	1
2213	0.847087	0.152913	5	0.72959	4
2268	0.856434	0.143566	5	0.242873	54
2270	0.856434	0.143566	5	1	1
2343	0.86878	0.13122	5	0	72
2435	0.881126	0.118874	5	0	91
2528	0.893472	0.106528	5	0	92
2604	0.904984	0.0950157	5	0.067465	75
2716	0.916972	0.0830276	5	0.0289657	111
2829	0.926623	0.0733769	5	0.218289	112
2831	0.926623	0.0733769	5	1	1
2929	0.935546	0.064454	5	0.277245	97
2987	0.939858	0.0601421	5	0.650739	57
3072	0.952104	0.0478958	5	0.00805006	84
3074	0.952104	0.0478958	5	1	1
3076	0.952104	0.0478958	5	1	1
3083	0.95257	0.0474296	5	0.96224	6
3086	0.952582	0.0474182	5	0.999076	2
3223	0.962648	0.0373515	5	0.184597	136
3225	0.962648	0.0373515	5	1	1
3246	0.963958	0.0360424	5	0.893966	20
3450	0.972462	0.0275375	5	0.3111	203
3453	0.972595	0.0274045	5	0.989227	2
3463	0.972901	0.0270989	5	0.97525	9
3466	0.97352	0.0264802	5	0.94988	2
3474	0.973638	0.0263623	5	0.990452	7
3478	0.973711	0.0262893	5	0.994084	3
3480	0.973711	0.0262893	5	1	1
3483	0.973711	0.0262889	5	0.99997	2
3486	0.973716	0.0262838	5	0.999583	2
3631	0.98085	0.0191496	5	0.422129	144
3633	0.98085	0.0191496	5	1	1
3636	0.980851	0.0191487	5	0.999933	2
3640	0.980944	0.0190563	5	0.992515	3
3642	0.980944	0.0190563	5	1	1
3676	0.981432	0.0185679	5	0.960439	33
3680	0.981438	0.0185619	5	0.999515	3
3682	0.981438	0.0185619	5	1	1
3685	0.981439	0.018561	5	0.999928	2
5	0.00291634	0.997084	6	0.763776	4
7	0.00291634	0.997084	6	1	1
14	0.00717861	0.992821	6	0.654756	6
25	0.0195243	0.980476	6	0	10
90	0.03187	0.96813	6	0	64
182	0.0442156	0.955784	6	0	91
195	0.0565613	0.943439	6	0	12
197	0.0565613	0.943439	6	1	1
206	0.068907	0.931093	6	0	8
239	0.0812527	0.918747	6	0	32
292	0.0935984	0.906402	6	0	52
303	0.105944	0.894056	6	0	10
313	0.11829	0.88171	6	0	9
355	0.130635	0.869365	6	0	41
378	0.142981	0.857019	6	0	22
380	0.142981	0.857019	6	1	1
385	0.151335	0.848665	6	0.323351	4
398	0.16368	0.83632	6	0	12
429	0.176026	0.823974	6	0	30
431	0.176026	0.823974	6	1	1
436	0.178362	0.821638	6	0.810783	4
448	0.189121	0.810879	6	0.128552	11
464	0.201466	0.798534	6	0	15
522	0.213812	0.786188	6	0	57
524	0.213812	0.786188	6	1	1
529	0.220446	0.779554	6	0.462653	4
534	0.226635	0.773365	6	0.498678	4
536	0.226635	0.773365	6	1	1
539	0.228903	0.771097	6	0.816309	2
580	0.241249	0.758751	6	0	40
620	0.253594	0.746406	6	0	39
623	0.257409	0.742591	6	0.690978	2
627	0.259097	0.740903	6	0.863329	3
629	0.259097	0.740903	6	1	1
704	0.271442	0.728558	6	0	74
726	0.283788	0.716212	6	0	21
729	0.284408	0.715592	6	0.949756	2
763	0.296754	0.703246	6	0	33
773	0.306899	0.693101	6	0.17827	9
790	0.318725	0.681275	6	0.0420841	16
793	0.319838	0.680162	6	0.909829	2
797	0.321409	0.678591	6	0.872745	3
853	0.333755	0.666245	6	0	55
855	0.333755	0.666245	6	1	1
858	0.334351	0.665649	6	0.951685	2
862	0.336128	0.663872	6	0.856078	3
864	0.336128	0.663872	6	1	1
869	0.338921	0.661079	6	0.773755	4
888	0.351267	0.648733	6	0	18
900	0.357993	0.642007	6	0.455225	11
930	0.370338	0.629662	6	0	29
947	0.381846	0.618154	6	0.0678951	16
950	0.384605	0.615395	6	0.776534	2
957	0.39148	0.60852	6	0.443123	6
962	0.397157	0.602843	6	0.540178	4
991	0.409502	0.590498	6	0	28
993	0.409502	0.590498	6	1	1
1024	0.421848	0.578152	6	0	30
1026	0.421848	0.578152	6	1	1
1028	0.421848	0.578152	6	1	1
1032	0.424395	0.575605	6	0.793708	3
1036	0.425055	0.574945	6	0.946555	3
1072	0.4374	0.5626	6	0	35
1090	0.449746	0.550254	6	0	17
1129	0.462092	0.537908	6	0	38
1138	0.470777	0.529223	6	0.29649	8
1140	0.470777	0.529223	6	1	1
1154	0.478425	0.521575	6	0.380469	13
1166	0.483719	0.516281	6	0.571185	11
1212	0.496065	0.503935	6	0	45
1228	0.508411	0.491589	6	0	15
1247	0.520756	0.479244	6	0	18
1306	0.533102	0.466898	6	0	58
1324	0.545448	0.454552	6	0	17
1345	0.557793	0.442207	6	0	20
1419	0.570139	0.429861	6	0	73
1449	0.582485	0.417515	6	0	29
1483	0.594831	0.405169	6	0	33
1502	0.607176	0.392824	6	0	18
1521	0.619399	0.380601	6	0.00993064	18
1563	0.631745	0.368255	6	0	41
1581	0.637651	0.362349	6	0.521595	17
1611	0.649997	0.350003	6	0	29
1613	0.649997	0.350003	6	1	1
1620	0.653539	0.346461	6	0.713063	6
1656	0.665885	0.334115	6	0	35
1707	0.678231	0.321769	6	0	50
1739	0.690576	0.309424	6	0	31
1784	0.702922	0.297078	6	0	44
1794	0.71114	0.28886	6	0.334318	9
1841	0.723486	0.276514	6	0	46
1882	0.735832	0.264168	6	0	40
1924	0.748177	0.251823	6	0	41
1937	0.758632	0.241368	6	0.153157	12
1996	0.770978	0.229022	6	0	58
2072	0.783324	0.216676	6	0	75
2076	0.784124	0.215876	6	0.935185	3
2079	0.784146	0.215854	6	0.998193	2
2081	0.784146	0.215854	6	1	1
2083	0.784146	0.215854	6	1	1
2085	0.784146	0.215854	6	1	1
2088	0.784159	0.215841	6	0.998952	2
2143	0.796505	0.203495	6	0	54
2145	0.796505	0.203495	6	1	1
2210	0.80885	0.19115	6	0	64
2275	0.821196	0.178804	6	0	64
2278	0.821873	0.178127	6	0.945195	2
2280	0.821873	0.178127	6	1	1
2284	0.821986	0.178014	6	0.990779	3
2287	0.821988	0.178012	6	0.999853	2
2319	0.833282	0.166718	6	0.0851928	31
2363	0.845536	0.154464	6	0.00743148	43
2507	0.857882	0.142118	6	0	143
2621	0.870227	0.129773	6	0	113
2623	0.870227	0.129773	6	1	1
2625	0.870227	0.129773	6	1	1
2648	0.873339	0.126661	6	0.747938	22
2713	0.885685	0.114315	6	0	64
2800	0.898031	0.101969	6	0	86
2869	0.909025	0.0909753	6	0.109485	68
2871	0.909025	0.0909753	6	1	1
2873	0.909025	0.0909753	6	1	1
2928	0.916694	0.0833058	6	0.37877	54
2940	0.917456	0.0825442	6	0.938311	11
3042	0.926751	0.0732487	6	0.24707	101
3045	0.926761	0.0732393	6	0.999233	2
3156	0.935836	0.0641642	6	0.264923	110
3224	0.948181	0.0518185	6	0	67
3226	0.948181	0.0518185	6	1	1
3356	0.960161	0.0398388	6	0.029637	129
3497	0.968715	0.0312854	6	0.30718	140
3502	0.968796	0.031204	6	0.993404	4
3686	0.975762	0.0242382	6	0.435773	183
3911	0.982725	0.0172754	6	0.436013	224
2	0	1	7	1	1
11	0.0119553	0.988045	7	0.0316196	8
18	0.0210068	0.978993	7	0.266826	6
37	0.0333525	0.966647	7	0	18
39	0.0333525	0.966647	7	1	1
60	0.0456982	0.954302	7	0	20
63	0.0457602	0.95424	7	0.994976	2
93	0.0581059	0.941894	7	0	29
107	0.0704516	0.929548	7	0	13
118	0.0789825	0.921017	7	0.308993	10
120	0.0789825	0.921017	7	1	1
122	0.0789825	0.921017	7	1	1
124	0.0789825	0.921017	7	1	1
135	0.0899836	0.910016	7	0.108914	10
142	0.0981191	0.901881	7	0.341026	6
153	0.110465	0.889535	7	0	10
168	0.12281	0.87719	7	0	14
183	0.13506	0.86494	7	0.00779004	14
185	0.13506	0.86494	7	1	1
191	0.143904	0.856096	7	0.283608	5
202	0.152735	0.847265	7	0.284737	10
233	0.16508	0.83492	7	0	30
273	0.177426	0.822574	7	0	39
281	0.185097	0.814903	7	0.378621	7
287	0.196816	0.803184	7	0.0508185	5
293	0.199593	0.800407	7	0.77507	5
298	0.205088	0.794912	7	0.554847	4
300	0.205088	0.794912	7	1	1
310	0.216343	0.783657	7	0.0883989	9
322	0.227076	0.772924	7	0.130589	11
326	0.231211	0.768789	7	0.665042	3
350	0.243557	0.756443	7	0	23
366	0.255903	0.744097	7	0	15
370	0.264747	0.735253	7	0.283654	3
372	0.264747	0.735253	7	1	1
374	0.264747	0.735253	7	1	1
414	0.277092	0.722908	7	0	39
419	0.279371	0.720629	7	0.815431	4
434	0.291717	0.708283	7	0	14
436	0.291717	0.708283	7	1	1
446	0.301256	0.698744	7	0.227334	9
457	0.313601	0.686399	7	0	10
459	0.313601	0.686399	7	1	1
466	0.324155	0.675845	7	0.145147	6
468	0.324155	0.675845	7	1	1
470	0.324155	0.675845	7	1	1
472	0.324155	0.675845	7	1	1
485	0.336501	0.663499	7	0	12
488	0.340534	0.659466	7	0.673329	2
532	0.352879	0.647121	7	0	43
534	0.352879	0.647121	7	1	1
538	0.3535	0.6465	7	0.94975	3
558	0.365845	0.634155	7	0	19
560	0.365845	0.634155	7	1	1
562	0.365845	0.634155	7	1	1
595	0.378191	0.621809	7	0	32
601	0.380425	0.619575	7	0.819022	5
615	0.388202	0.611798	7	0.370101	13
623	0.3904	0.6096	7	0.821928	7
660	0.402746	0.597254	7	0	36
674	0.415092	0.584908	7	0	13
706	0.427437	0.572563	7	0	31
708	0.427437	0.572563	7	1	1
752	0.439783	0.560217	7	0	43
773	0.452129	0.547871	7	0	20
777	0.455752	0.544248	7	0.706541	3
792	0.468097	0.531903	7	0	14
814	0.480443	0.519557	7	0	21
816	0.480443	0.519557	7	1	1
857	0.492789	0.507211	7	0	40
859	0.492789	0.507211	7	1	1
967	0.505134	0.494866	7	0	107
980	0.508564	0.491436	7	0.72222	12
984	0.509293	0.490707	7	0.940939	3
1029	0.521639	0.478361	7	0	44
1057	0.533984	0.466016	7	0	27
1065	0.536425	0.463575	7	0.802313	7
1095	0.548771	0.451229	7	0	29
1107	0.551736	0.448264	7	0.759778	11
1121	0.556447	0.443553	7	0.618433	13
1124	0.560413	0.439587	7	0.678747	2
1141	0.572759	0.427241	7	0	16
1266	0.585104	0.414896	7	0	124
1268	0.585104	0.414896	7	1	1
1292	0.59745	0.40255	7	0	23
1294	0.59745	0.40255	7	1	1
1297	0.5979	0.4021	7	0.963518	2
1312	0.606538	0.393462	7	0.30033	14
1343	0.618884	0.381116	7	0	30
1383	0.63123	0.36877	7	0	39
1420	0.643575	0.356425	7	0	36
1460	0.655921	0.344079	7	0	39
1475	0.667912	0.332088	7	0.0287473	14
1477	0.667912	0.332088	7	1	1
1494	0.680258	0.319742	7	0	16
1534	0.692603	0.307397	7	0	39
1570	0.704949	0.295051	7	0	35
1572	0.704949	0.295051	7	1	1
1638	0.717295	0.282705	7	0	65
1699	0.72964	0.27036	7	0	60
1757	0.741986	0.258014	7	0	57
1799	0.754332	0.245668	7	0	41
1846	0.766677	0.233323	7	0	46
1849	0.766971	0.233029	7	0.976245	2
1965	0.779316	0.220684	7	0	115
1967	0.779316	0.220684	7	1	1
1969	0.779316	0.220684	7	1	1
1971	0.779316	0.220684	7	1	1
2031	0.791662	0.208338	7	0	59
2042	0.800682	0.199318	7	0.269354	10
2086	0.813028	0.186972	7	0	43
2122	0.823942	0.176058	7	0.115959	35
2206	0.836288	0.163712	7	0	83
2216	0.838608	0.161392	7	0.812076	9
2226	0.840857	0.159143	7	0.817803	9
2228	0.840857	0.159143	7	1	1
2235	0.842103	0.157897	7	0.899116	6
2281	0.851119	0.148881	7	0.269649	45
2354	0.863465	0.136535	7	0	72
2356	0.863465	0.136535	7	1	1
2360	0.865326	0.134674	7	0.849274	3
2371	0.866539	0.133461	7	0.901695	10
2438	0.875597	0.124403	7	0.266317	66
2440	0.875597	0.124403	7	1	1
2515	0.887804	0.112196	7	0.0112773	74
2553	0.894964	0.105036	7	0.420023	37
2555	0.894964	0.105036	7	1	1
2557	0.894964	0.105036	7	1	1
2564	0.896647	0.103353	7	0.863655	6
2609	0.901187	0.0988135	7	0.632309	44
2640	0.907019	0.0929809	7	0.52756	30
2644	0.907362	0.0926376	7	0.972191	3
2740	0.919708	0.0802919	7	0	95
2795	0.929436	0.0705643	7	0.212063	54
2862	0.939564	0.0604362	7	0.179622	66
2865	0.939604	0.0603957	7	0.996721	2
2946	0.950203	0.0497969	7	0.141495	80
3080	0.957203	0.0427967	7	0.432985	133
3225	0.966955	0.0330454	7	0.210143	144
3356	0.975001	0.0249992	7	0.348259	130
3800	0.982225	0.0177748	7	0.414822	443
25	0.0123457	0.987654	8	0	24
37	0.0182938	0.981706	8	0.518198	11
39	0.0182938	0.981706	8	1	1
45	0.0246912	0.975309	8	0.481813	5
61	0.0370369	0.962963	8	0	15
63	0.0370369	0.962963	8	1	1
74	0.0483564	0.951644	8	0.0831168	10
76	0.0483564	0.951644	8	1	1
93	0.0607021	0.939298	8	0	16
120	0.0730478	0.926952	8	0	26
139	0.0853935	0.914607	8	0	18
145	0.0891633	0.910837	8	0.694643	5
150	0.0946128	0.905387	8	0.558595	4
162	0.106629	0.893371	8	0.0266586	11
181	0.118975	0.881025	8	0	18
206	0.131321	0.868679	8	0	24
258	0.143666	0.856334	8	0	51
266	0.153514	0.846486	8	0.202318	7
309	0.16586	0.83414	8	0	42
320	0.178206	0.821794	8	0	10
322	0.178206	0.821794	8	1	1
330	0.184914	0.815086	8	0.456644	7
340	0.192908	0.807092	8	0.352478	9
361	0.205254	0.794746	8	0	20
363	0.205254	0.794746	8	1	1
366	0.20545	0.79455	8	0.98405	2
388	0.217796	0.782204	8	0	21
403	0.230142	0.769858	8	0	14
405	0.230142	0.769858	8	1	1
426	0.242487	0.757513	8	0	20
430	0.244483	0.755517	8	0.838327	3
474	0.256829	0.743171	8	0	43
515	0.269175	0.730825	8	0	40
531	0.28152	0.71848	8	0	15
547	0.293193	0.706807	8	0.0545169	15
568	0.305539	0.694461	8	0	20
596	0.317884	0.682116	8	0	27
602	0.321626	0.678374	8	0.696924	5
606	0.322628	0.677372	8	0.918833	3
609	0.323233	0.676767	8	0.951032	2
611	0.323233	0.676767	8	1	1
613	0.323233	0.676767	8	1	1
629	0.335578	0.664422	8	0	15
648	0.347924	0.652076	8	0	18
686	0.36027	0.63973	8	0	37
761	0.372615	0.627385	8	0	74
766	0.384961	0.615039	8	0	4
788	0.397307	0.602693	8	0	21
790	0.397307	0.602693	8	1	1
804	0.409652	0.590348	8	0	13
860	0.421998	0.578002	8	0	55
926	0.434344	0.565656	8	0	65
958	0.44669	0.55331	8	0	31
985	0.459035	0.540965	8	0	26
1023	0.471381	0.528619	8	0	37
1041	0.483195	0.516805	8	0.0430301	17
1043	0.483195	0.516805	8	1	1
1114	0.495541	0.504459	8	0	70
1121	0.507464	0.492536	8	0.0342134	6
1124	0.50784	0.49216	8	0.969594	2
1127	0.507957	0.492043	8	0.990523	2
1129	0.507957	0.492043	8	1	1
1201	0.520302	0.479698	8	0	71
1221	0.532498	0.467502	8	0.0121707	19
1276	0.544843	0.455157	8	0	54
1305	0.556004	0.443996	8	0.0959839	28
1308	0.556441	0.443559	8	0.964629	2
1337	0.568787	0.431213	8	0	28
1415	0.581132	0.418868	8	0	77
1446	0.593478	0.406522	8	0	30
1471	0.605824	0.394176	8	0	24
1473	0.605824	0.394176	8	1	1
1476	0.607927	0.392073	8	0.829613	2
1553	0.620273	0.379727	8	0	76
1563	0.62304	0.37696	8	0.775866	9
1619	0.635386	0.364614	8	0	55
1621	0.635386	0.364614	8	1	1
1624	0.635413	0.364587	8	0.9978	2
1630	0.636582	0.363418	8	0.905299	5
1632	0.636582	0.363418	8	1	1
1646	0.646223	0.353777	8	0.219077	13
1657	0.655402	0.344598	8	0.256474	10
1677	0.662289	0.337711	8	0.442193	19
1682	0.664425	0.335575	8	0.826947	4
1751	0.676771	0.323229	8	0	68
1753	0.676771	0.323229	8	1	1
1806	0.689117	0.310883	8	0	52
1847	0.701462	0.298538	8	0	40
1888	0.713808	0.286192	8	0	40
1942	0.726154	0.273846	8	0	53
1977	0.738304	0.261696	8	0.0157955	34
2048	0.75065	0.24935	8	0	70
2070	0.759942	0.240058	8	0.247355	21
2073	0.759974	0.240026	8	0.997361	2
2100	0.770686	0.229314	8	0.132322	26
2146	0.783032	0.216968	8	0	45
2150	0.783243	0.216757	8	0.982941	3
2228	0.795588	0.204412	8	0	77
2275	0.807934	0.192066	8	0	46
2277	0.807934	0.192066	8	1	1
2313	0.819387	0.180613	8	0.0722865	35
2317	0.820654	0.179346	8	0.897443	3
2382	0.832999	0.167001	8	0	64
2384	0.832999	0.167001	8	1	1
2430	0.845345	0.154655	8	0	45
2438	0.846205	0.153795	8	0.930358	7
2475	0.854457	0.145543	8	0.33152	36
2501	0.858161	0.141839	8	0.7	25
2506	0.85923	0.14077	8	0.91344	4
2553	0.866437	0.133563	8	0.416206	46
2599	0.874231	0.125769	8	0.368706	45
2654	0.883384	0.116616	8	0.25862	54
2726	0.89375	0.10625	8	0.160296	71
2728	0.89375	0.10625	8	1	1
2799	0.906096	0.0939039	8	0	70
2872	0.914693	0.085307	8	0.303657	72
2976	0.927039	0.0729614	8	0	103
2980	0.927156	0.0728442	8	0.990512	3
2982	0.927156	0.0728442	8	1	1
3068	0.937654	0.0623461	8	0.149652	85
3172	0.945902	0.0540983	8	0.331924	103
3343	0.958247	0.0417526	8	0	170
3365	0.959293	0.0407065	8	0.915268	21
3369	0.959294	0.0407056	8	0.999924	3
3572	0.968054	0.0319457	8	0.290453	202
3576	0.968067	0.0319333	8	0.998992	3
3579	0.968067	0.0319333	8	0.999999	2
3581	0.968067	0.0319333	8	1	1
3583	0.968067	0.0319333	8	1	1
3588	0.968212	0.0317876	8	0.988197	4
3591	0.968396	0.0316045	8	0.98517	2
3745	0.976071	0.0239293	8	0.37831	153
3958	0.983084	0.0169163	8	0.431951	212
3960	0.983084	0.0169163	8	1	1
13	0.0123457	0.987654	9	0	12
15	0.0123457	0.987654	9	1	1
43	0.0246914	0.975309	9	0	27
46	0.027056	0.972944	9	0.808465	2
48	0.027056	0.972944	9	1	1
93	0.0394017	0.960598	9	0	44
119	0.0517473	0.948253	9	0	25
123	0.0554171	0.944583	9	0.702746	3
131	0.0658775	0.934123	9	0.152714	7
136	0.0741944	0.925806	9	0.326325	4
143	0.0841683	0.915832	9	0.192114	6
169	0.096514	0.903486	9	0	25
171	0.096514	0.903486	9	1	1
179	0.10886	0.89114	9	0	7
181	0.10886	0.89114	9	1	1
184	0.109045	0.890955	9	0.985028	2
206	0.12139	0.87861	9	0	21
214	0.131714	0.868286	9	0.163738	7
219	0.137773	0.862227	9	0.509217	4
221	0.137773	0.862227	9	1	1
234	0.148882	0.851118	9	0.100173	12
240	0.158198	0.841802	9	0.245449	5
249	0.16434	0.83566	9	0.502487	8
251	0.16434	0.83566	9	1	1
285	0.176686	0.823314	9	0	33
289	0.176927	0.823073	9	0.98045	3
313	0.189273	0.810727	9	0	23
330	0.201618	0.798382	9	0	16
355	0.213964	0.786036	9	0	24
402	0.22631	0.77369	9	0	46
404	0.22631	0.77369	9	1	1
411	0.235245	0.764755	9	0.276214	6
413	0.235245	0.764755	9	1	1
415	0.235245	0.764755	9	1	1
425	0.240572	0.759428	9	0.568559	9
433	0.252918	0.747082	9	0	7
437	0.254797	0.745203	9	0.847767	3
452	0.267143	0.732857	9	0	14
457	0.272157	0.727843	9	0.593795	4
464	0.274473	0.725527	9	0.812411	6
466	0.274473	0.725527	9	1	1
468	0.274473	0.725527	9	1	1
470	0.274473	0.725527	9	1	1
472	0.274473	0.725527	9	1	1
479	0.277976	0.722024	9	0.716289	6
509	0.290322	0.709678	9	0	29
527	0.302667	0.697333	9	0	17
581	0.315013	0.684987	9	0	53
606	0.327359	0.672641	9	0	24
620	0.339704	0.660296	9	0	13
622	0.339704	0.660296	9	1	1
634	0.35205	0.64795	9	0	11
643	0.357983	0.642017	9	0.519453	8
645	0.357983	0.642017	9	1	1
674	0.370328	0.629672	9	0	28
687	0.382674	0.617326	9	0	12
712	0.39502	0.60498	9	0	24
731	0.407365	0.592635	9	0	18
779	0.419711	0.580289	9	0	47
798	0.432057	0.567943	9	0	18
826	0.444403	0.555597	9	0	27
828	0.444403	0.555597	9	1	1
876	0.456748	0.543252	9	0	47
888	0.468065	0.531935	9	0.0833091	11
932	0.480411	0.519589	9	0	43
958	0.492757	0.507243	9	0	25
1027	0.505102	0.494898	9	0	68
1036	0.511745	0.488255	9	0.461989	8
1086	0.52409	0.47591	9	0	49
1088	0.52409	0.47591	9	1	1
1106	0.536436	0.463564	9	0	17
1108	0.536436	0.463564	9	1	1
1130	0.548782	0.451218	9	0	21
1132	0.548782	0.451218	9	1	1
1134	0.548782	0.451218	9	1	1
1136	0.548782	0.451218	9	1	1
1163	0.561127	0.438873	9	0	26
1200	0.573473	0.426527	9	0	36
1205	0.576202	0.423798	9	0.778943	4
1226	0.588253	0.411747	9	0.0238947	20
1259	0.600598	0.399402	9	0	32
1271	0.609277	0.390723	9	0.297052	11
1274	0.609537	0.390463	9	0.978884	2
1288	0.616727	0.383273	9	0.417635	13
1296	0.620371	0.379629	9	0.704809	7
1300	0.622271	0.377729	9	0.846147	3
1302	0.622271	0.377729	9	1	1
1355	0.634617	0.365383	9	0	52
1358	0.634698	0.365302	9	0.993372	2
1385	0.647044	0.352956	9	0	26
1430	0.65939	0.34061	9	0	44
1433	0.659647	0.340353	9	0.979176	2
1518	0.671992	0.328008	9	0	84
1560	0.684338	0.315662	9	0	41
1582	0.696684	0.303316	9	0	21
1584	0.696684	0.303316	9	1	1
1670	0.70903	0.29097	9	0	85
1672	0.70903	0.29097	9	1	1
1674	0.70903	0.29097	9	1	1
1684	0.712805	0.287195	9	0.694165	9
1686	0.712805	0.287195	9	1	1
1695	0.721764	0.278236	9	0.274335	8
1702	0.722741	0.277259	9	0.920841	6
1706	0.722961	0.277039	9	0.982236	3
1722	0.731801	0.268199	9	0.283966	15
1725	0.731823	0.268177	9	0.998203	2
1762	0.740643	0.259357	9	0.285525	36
1826	0.752989	0.247011	9	0	63
1874	0.765335	0.234665	9	0	47
1910	0.777169	0.222831	9	0.0414091	35
1914	0.778454	0.221546	9	0.895947	3
1920	0.780016	0.219984	9	0.87346	5
1983	0.792362	0.207638	9	0	62
1985	0.792362	0.207638	9	1	1
1987	0.792362	0.207638	9	1	1
2020	0.804102	0.195898	9	0.0490647	32
2065	0.816447	0.183553	9	0	44
2095	0.826312	0.173688	9	0.200936	29
2140	0.838658	0.161342	9	0	44
2142	0.838658	0.161342	9	1	1
2156	0.842423	0.157577	9	0.695007	13
2228	0.854769	0.145231	9	0	71
2230	0.854769	0.145231	9	1	1
2346	0.867115	0.132885	9	0	115
2381	0.875463	0.124537	9	0.323828	34
2440	0.887808	0.112192	9	0	58
2535	0.900154	0.099846	9	0	94
2544	0.900818	0.0991823	9	0.946238	8
2589	0.907844	0.0921562	9	0.430887	44
2693	0.918657	0.0813428	9	0.124117	103
2729	0.925665	0.0743349	9	0.432353	35
2732	0.925668	0.0743318	9	0.999756	2
2789	0.934843	0.0651566	9	0.256805	56
2792	0.934847	0.0651531	9	0.999714	2
2794	0.934847	0.0651531	9	1	1
2858	0.940999	0.0590012	9	0.501698	63
3017	0.953206	0.0467937	9	0.0111945	158
3223	0.963375	0.0366253	9	0.176361	205
3362	0.970772	0.0292284	9	0.400844	138
3650	0.978934	0.0210658	9	0.338836	287
3963	0.987	0.0129997	9	0.346642	312
3965	0.987	0.0129997	9	1	1
21	0.0123457	0.987654	10	0	20
35	0.0246914	0.975309	10	0	13
48	0.037037	0.962963	10	0	12
50	0.037037	0.962963	10	1	1
87	0.0493827	0.950617	10	0	36
97	0.0617284	0.938272	10	0	9
125	0.0740741	0.925926	10	0	27
129	0.0767934	0.923207	10	0.779739	3
131	0.0767934	0.923207	10	1	1
152	0.089139	0.910861	10	0	20
154	0.089139	0.910861	10	1	1
160	0.0990426	0.900957	10	0.197814	5
202	0.111388	0.888612	10	0	41
298	0.123734	0.876266	10	0	95
301	0.124276	0.875724	10	0.956101	2
303	0.124276	0.875724	10	1	1
351	0.136622	0.863378	10	0	47
392	0.148967	0.851033	10	0	40
422	0.161313	0.838687	10	0	29
425	0.163872	0.836128	10	0.792721	2
427	0.163872	0.836128	10	1	1
429	0.163872	0.836128	10	1	1
450	0.176218	0.823782	10	0	20
457	0.185719	0.814281	10	0.230393	6
486	0.198065	0.801935	10	0	28
488	0.198065	0.801935	10	1	1
494	0.203439	0.796561	10	0.564699	5
496	0.203439	0.796561	10	1	1
508	0.215626	0.784374	10	0.0128567	11
524	0.227971	0.772029	10	0	15
527	0.229162	0.770838	10	0.903549	2
565	0.241508	0.758492	10	0	37
569	0.241734	0.758266	10	0.981647	3
571	0.241734	0.758266	10	1	1
600	0.25408	0.74592	10	0	28
603	0.254534	0.745466	10	0.963263	2
606	0.256673	0.743327	10	0.826703	2
669	0.269019	0.730981	10	0	62
685	0.281364	0.718636	10	0	15
697	0.29246	0.70754	10	0.10124	11
718	0.304806	0.695194	10	0	20
734	0.314776	0.685224	10	0.192384	15
736	0.314776	0.685224	10	1	1
739	0.316102	0.683898	10	0.892661	2
760	0.328447	0.671553	10	0	20
762	0.328447	0.671553	10	1	1
798	0.340793	0.659207	10	0	35
802	0.343061	0.656939	10	0.8163	3
816	0.353101	0.646899	10	0.186784	13
818	0.353101	0.646899	10	1	1
820	0.353101	0.646899	10	1	1
825	0.354445	0.645555	10	0.891082	4
827	0.354445	0.645555	10	1	1
873	0.366791	0.633209	10	0	45
896	0.379137	0.620863	10	0	22
898	0.379137	0.620863	10	1	1
913	0.391482	0.608518	10	0	14
936	0.403828	0.596172	10	0	22
963	0.416174	0.583826	10	0	26
967	0.416749	0.583251	10	0.953395	3
971	0.417216	0.582784	10	0.962133	3
975	0.428036	0.571964	10	0.123658	3
1030	0.440381	0.559619	10	0	54
1061	0.452727	0.547273	10	0	30
1078	0.465073	0.534927	10	0	16
1123	0.477418	0.522582	10	0	44
1126	0.477796	0.522204	10	0.969373	2
1132	0.480172	0.519828	10	0.807611	5
1135	0.48057	0.51943	10	0.967742	2
1138	0.480748	0.519252	10	0.985536	2
1172	0.493094	0.506906	10	0	33
1174	0.493094	0.506906	10	1	1
1176	0.493094	0.506906	10	1	1
1178	0.493094	0.506906	10	1	1
1238	0.50544	0.49456	10	0	59
1262	0.517785	0.482215	10	0	23
1267	0.518419	0.481581	10	0.94867	4
1283	0.52787	0.47213	10	0.234474	15
1285	0.52787	0.47213	10	1	1
1346	0.540216	0.459784	10	0	60
1384	0.552561	0.447439	10	0	37
1395	0.564676	0.435324	10	0.0187163	10
1398	0.564907	0.435093	10	0.981317	2
1400	0.564907	0.435093	10	1	1
1406	0.572038	0.427962	10	0.422392	5
1408	0.572038	0.427962	10	1	1
1442	0.584383	0.415617	10	0	33
1529	0.596729	0.403271	10	0	86
1536	0.59956	0.40044	10	0.770665	6
1564	0.611906	0.388094	10	0	27
1567	0.61359	0.38641	10	0.863601	2
1619	0.625936	0.374064	10	0	51
1621	0.625936	0.374064	10	1	1
1664	0.638281	0.361719	10	0	42
1681	0.649768	0.350232	10	0.0696073	16
1684	0.649983	0.350017	10	0.98254	2
1688	0.651081	0.348919	10	0.911056	3
1690	0.651081	0.348919	10	1	1
1692	0.651081	0.348919	10	1	1
1697	0.653507	0.346493	10	0.803524	4
1738	0.665853	0.334147	10	0	40
1740	0.665853	0.334147	10	1	1
1792	0.678198	0.321802	10	0	51
1794	0.678198	0.321802	10	1	1
1797	0.678232	0.321768	10	0.99724	2
1881	0.690578	0.309422	10	0	83
1895	0.700073	0.299927	10	0.230869	13
1897	0.700073	0.299927	10	1	1
1914	0.708181	0.291819	10	0.343295	16
1927	0.716063	0.283937	10	0.361511	12
1934	0.720578	0.279422	10	0.634357	6
1936	0.720578	0.279422	10	1	1
1939	0.720988	0.279012	10	0.966791	2
1944	0.72293	0.27707	10	0.842641	4
1948	0.723013	0.276987	10	0.993319	3
1979	0.735358	0.264642	10	0	30
2070	0.747704	0.252296	10	0	90
2115	0.76005	0.23995	10	0	44
2137	0.772026	0.227974	10	0.0299567	21
2139	0.772026	0.227974	10	1	1
2222	0.784371	0.215629	10	0	82
2224	0.784371	0.215629	10	1	1
2278	0.796717	0.203283	10	0	53
2305	0.804341	0.195659	10	0.382478	26
2349	0.812669	0.187331	10	0.32544	43
2377	0.81984	0.18016	10	0.419134	27
2456	0.832185	0.167815	10	0	78
2468	0.834768	0.165232	10	0.790791	11
2580	0.847114	0.152886	10	0	111
2635	0.85946	0.14054	10	0	54
2641	0.860363	0.139637	10	0.926841	5
2708	0.872709	0.127291	10	0	66
2714	0.874189	0.125811	10	0.880069	5
2789	0.885966	0.114034	10	0.0460937	74
2791	0.885966	0.114034	10	1	1
2842	0.895191	0.104809	10	0.252742	50
2845	0.895211	0.104789	10	0.998394	2
2912	0.905986	0.0940139	10	0.127218	66
2988	0.916527	0.0834729	10	0.146182	75
3021	0.921311	0.0786885	10	0.612463	32
3028	0.922566	0.0774345	10	0.898423	6
3121	0.934911	0.0650888	10	0	92
3237	0.944399	0.0556013	10	0.231511	115
3251	0.945217	0.0547832	10	0.933737	13
3337	0.952829	0.0471705	10	0.383372	85
3339	0.952829	0.0471705	10	1	1
3493	0.962964	0.0370357	10	0.17908	153
3496	0.963134	0.0368659	10	0.986246	2
3507	0.963395	0.0366054	10	0.978902	10
3509	0.963395	0.0366054	10	1	1
3513	0.963429	0.0365714	10	0.997244	3
3515	0.963429	0.0365714	10	1	1
3680	0.970892	0.0291083	10	0.395491	164
3886	0.980109	0.0198909	10	0.253388	205
3890	0.980193	0.0198069	10	0.993199	3
11	0.0123457	0.987654	11	0	10
82	0.0246914	0.975309	11	0	70
114	0.037037	0.962963	11	0	31
145	0.0493827	0.950617	11	0	30
207	0.0617284	0.938272	11	0	61
210	0.0620055	0.937994	11	0.977554	2
213	0.0625819	0.937418	11	0.953314	2
215	0.0625819	0.937418	11	1	1
296	0.0749276	0.925072	11	0	80
306	0.0872732	0.912727	11	0	9
308	0.0872732	0.912727	11	1	1
317	0.0978286	0.902171	11	0.14502	8
319	0.0978286	0.902171	11	1	1
323	0.100114	0.899886	11	0.814893	3
345	0.11246	0.88754	11	0	21
381	0.124805	0.875195	11	0	35
398	0.137151	0.862849	11	0	16
423	0.149497	0.850503	11	0	24
427	0.15333	0.84667	11	0.689517	3
429	0.15333	0.84667	11	1	1
456	0.165675	0.834325	11	0	26
464	0.174036	0.825964	11	0.322796	7
506	0.186382	0.813618	11	0	41
549	0.198727	0.801273	11	0	42
551	0.198727	0.801273	11	1	1
555	0.202289	0.797711	11	0.711462	3
562	0.211626	0.788374	11	0.243743	6
584	0.223972	0.776028	11	0	21
614	0.236317	0.763683	11	0	29
623	0.248663	0.751337	11	0	8
693	0.261009	0.738991	11	0	69
715	0.273354	0.726646	11	0	21
722	0.280699	0.719301	11	0.40507	6
736	0.293045	0.706955	11	0	13
738	0.293045	0.706955	11	1	1
740	0.293045	0.706955	11	1	1
756	0.305391	0.694609	11	0	15
758	0.305391	0.694609	11	1	1
781	0.317736	0.682264	11	0	22
783	0.317736	0.682264	11	1	1
785	0.317736	0.682264	11	1	1
788	0.318388	0.681612	11	0.947181	2
790	0.318388	0.681612	11	1	1
793	0.319324	0.680676	11	0.924222	2
824	0.331669	0.668331	11	0	30
826	0.331669	0.668331	11	1	1
872	0.344015	0.655985	11	0	45
878	0.352588	0.647412	11	0.305586	5
887	0.363455	0.636545	11	0.119753	8
913	0.375801	0.624199	11	0	25
921	0.385874	0.614126	11	0.18408	7
928	0.395356	0.604644	11	0.231982	6
979	0.407702	0.592298	11	0	50
1018	0.420047	0.579953	11	0	38
1025	0.429372	0.570628	11	0.244716	6
1062	0.441717	0.558283	11	0	36
1078	0.454063	0.545937	11	0	15
1080	0.454063	0.545937	11	1	1
1095	0.466409	0.533591	11	0	14
1108	0.477318	0.522682	11	0.116388	12
1147	0.489663	0.510337	11	0	38
1149	0.489663	0.510337	11	1	1
1181	0.502009	0.497991	11	0	31
1212	0.514355	0.485645	11	0	30
1217	0.518945	0.481055	11	0.628139	4
1219	0.518945	0.481055	11	1	1
1297	0.531291	0.468709	11	0	77
1309	0.543637	0.456363	11	0	11
1363	0.555983	0.444017	11	0	53
1365	0.555983	0.444017	11	1	1
1417	0.568328	0.431672	11	0	51
1440	0.580674	0.419326	11	0	22
1442	0.580674	0.419326	11	1	1
1458	0.59302	0.40698	11	0	15
1461	0.593995	0.406005	11	0.920977	2
1522	0.606341	0.393659	11	0	60
1545	0.615371	0.384629	11	0.268549	22
1547	0.615371	0.384629	11	1	1
1552	0.61834	0.38166	11	0.759513	4
1600	0.630686	0.369314	11	0	47
1620	0.643031	0.356969	11	0	19
1705	0.655377	0.344623	11	0	84
1762	0.667723	0.332277	11	0	56
1783	0.676563	0.323437	11	0.28394	20
1817	0.688909	0.311091	11	0	33
1819	0.688909	0.311091	11	1	1
1821	0.688909	0.311091	11	1	1
1823	0.688909	0.311091	11	1	1
1853	0.701254	0.298746	11	0	29
1906	0.7136	0.2864	11	0	52
1908	0.7136	0.2864	11	1	1
1910	0.7136	0.2864	11	1	1
1914	0.714131	0.285869	11	0.956995	3
1943	0.723471	0.276529	11	0.243444	28
1966	0.735817	0.264183	11	0	22
1990	0.748163	0.251837	11	0	23
2052	0.760508	0.239492	11	0	61
2128	0.772854	0.227146	11	0	75
2139	0.77414	0.22586	11	0.895811	10
2187	0.783836	0.216164	11	0.214632	47
2190	0.783839	0.216161	11	0.99973	2
2213	0.791049	0.208951	11	0.415993	22
2296	0.803395	0.196605	11	0	82
2338	0.812634	0.187366	11	0.251668	41
2340	0.812634	0.187366	11	1	1
2428	0.824979	0.175021	11	0	87
2519	0.837325	0.162675	11	0	90
2568	0.849671	0.150329	11	0	48
2570	0.849671	0.150329	11	1	1
2644	0.862016	0.137984	11	0	73
2720	0.873569	0.126431	11	0.0642633	75
2769	0.883113	0.116887	11	0.226879	48
2831	0.892684	0.107316	11	0.22482	61
2833	0.892684	0.107316	11	1	1
2835	0.892684	0.107316	11	1	1
2866	0.900856	0.0991439	11	0.338024	30
2869	0.900902	0.099098	11	0.996288	2
2871	0.900902	0.099098	11	1	1
2873	0.900902	0.099098	11	1	1
2876	0.901412	0.0985876	11	0.958658	2
2878	0.901412	0.0985876	11	1	1
2964	0.910242	0.0897585	11	0.284837	85
3042	0.918039	0.0819611	11	0.368413	77
3044	0.918039	0.0819611	11	1	1
3145	0.930385	0.0696154	11	0	100
3214	0.939337	0.0606627	11	0.274832	68
3216	0.939337	0.0606627	11	1	1
3218	0.939337	0.0606627	11	1	1
3312	0.9465	0.0535001	11	0.419826	93
3489	0.956272	0.0437278	11	0.208446	176
3491	0.956272	0.0437278	11	1	1
3523	0.959648	0.0403517	11	0.726532	31
3742	0.969192	0.0308083	11	0.226985	218
3918	0.977366	0.0226337	11	0.33786	175
14	0.0123457	0.987654	12	0	13
22	0.0219089	0.978091	12	0.22538	7
25	0.0235203	0.97648	12	0.869474	2
35	0.035866	0.964134	12	0	9
45	0.0482117	0.951788	12	0	9
68	0.0605573	0.939443	12	0	22
79	0.0708074	0.929193	12	0.169747	10
91	0.0831531	0.916847	12	0	11
119	0.0954987	0.904501	12	0	27
122	0.104386	0.895614	12	0.2801	2
125	0.104516	0.895484	12	0.989522	2
141	0.116861	0.883139	12	0	15
144	0.123622	0.876378	12	0.452403	2
155	0.135082	0.864918	12	0.0717092	10
157	0.135082	0.864918	12	1	1
160	0.135964	0.864036	12	0.928549	2
183	0.14831	0.85169	12	0	22
202	0.160656	0.839344	12	0	18
215	0.173001	0.826999	12	0	12
221	0.181756	0.818244	12	0.290889	5
242	0.194102	0.805898	12	0	20
278	0.206447	0.793553	12	0	35
281	0.209563	0.790437	12	0.747659	2
319	0.221908	0.778092	12	0	37
340	0.234254	0.765746	12	0	20
348	0.238407	0.761593	12	0.663607	7
350	0.238407	0.761593	12	1	1
353	0.24213	0.75787	12	0.698438	2
356	0.242364	0.757636	12	0.98101	2
405	0.25471	0.74529	12	0	48
424	0.267056	0.732944	12	0	18
426	0.267056	0.732944	12	1	1
429	0.267178	0.732822	12	0.990132	2
440	0.276821	0.723179	12	0.218914	10
445	0.278105	0.721895	12	0.895968	4
463	0.290451	0.709549	12	0	17
476	0.302796	0.697204	12	0	12
478	0.302796	0.697204	12	1	1
495	0.315142	0.684858	12	0	16
530	0.327488	0.672512	12	0	34
533	0.33119	0.66881	12	0.700099	2
535	0.33119	0.66881	12	1	1
576	0.343536	0.656464	12	0	40
680	0.355881	0.644119	12	0	103
683	0.359001	0.640999	12	0.747329	2
703	0.371347	0.628653	12	0	19
712	0.375772	0.624228	12	0.641519	8
714	0.375772	0.624228	12	1	1
719	0.376451	0.623549	12	0.944991	4
721	0.376451	0.623549	12	1	1
723	0.376451	0.623549	12	1	1
763	0.388797	0.611203	12	0	39
817	0.401143	0.598857	12	0	53
819	0.401143	0.598857	12	1	1
862	0.413488	0.586512	12	0	42
885	0.425834	0.574166	12	0	22
912	0.43818	0.56182	12	0	26
919	0.442255	0.557745	12	0.669889	6
961	0.454601	0.545399	12	0	41
963	0.454601	0.545399	12	1	1
982	0.46564	0.53436	12	0.105831	18
984	0.46564	0.53436	12	1	1
997	0.477986	0.522014	12	0	12
1028	0.490331	0.509669	12	0	30
1030	0.490331	0.509669	12	1	1
1032	0.490331	0.509669	12	1	1
1034	0.490331	0.509669	12	1	1
1047	0.498273	0.501727	12	0.356736	12
1062	0.505262	0.494738	12	0.433887	14
1066	0.507665	0.492335	12	0.805341	3
1136	0.520011	0.479989	12	0	69
1160	0.532067	0.467933	12	0.0234758	23
1200	0.544412	0.455588	12	0	39
1203	0.54557	0.45443	12	0.906234	2
1222	0.55649	0.44351	12	0.115462	18
1231	0.559004	0.440996	12	0.796364	8
1233	0.559004	0.440996	12	1	1
1236	0.559133	0.440867	12	0.989593	2
1261	0.571478	0.428522	12	0	24
1267	0.573529	0.426471	12	0.833925	5
1269	0.573529	0.426471	12	1	1
1313	0.585874	0.414126	12	0	43
1315	0.585874	0.414126	12	1	1
1388	0.59822	0.40178	12	0	72
1407	0.609838	0.390162	12	0.0589238	18
1458	0.622184	0.377816	12	0	50
1460	0.622184	0.377816	12	1	1
1470	0.62618	0.37382	12	0.676278	9
1506	0.638526	0.361474	12	0	35
1508	0.638526	0.361474	12	1	1
1525	0.647917	0.352083	12	0.239307	16
1585	0.660263	0.339737	12	0	59
1593	0.666946	0.333054	12	0.458722	7
1623	0.679291	0.320709	12	0	29
1700	0.691637	0.308363	12	0	76
1758	0.703983	0.296017	12	0	57
1795	0.716328	0.283672	12	0	36
1832	0.728674	0.271326	12	0	36
1884	0.74102	0.25898	12	0	51
1888	0.748433	0.251567	12	0.399515	3
1891	0.749105	0.250895	12	0.945546	2
1905	0.757042	0.242958	12	0.357119	13
1907	0.757042	0.242958	12	1	1
1909	0.757042	0.242958	12	1	1
1911	0.757042	0.242958	12	1	1
1913	0.757042	0.242958	12	1	1
1922	0.764022	0.235978	12	0.434589	8
1962	0.774486	0.225514	12	0.152432	39
1964	0.774486	0.225514	12	1	1
2027	0.786832	0.213168	12	0	62
2051	0.793859	0.206141	12	0.430842	23
2085	0.804612	0.195388	12	0.128969	33
2130	0.816958	0.183042	12	0	44
2205	0.829303	0.170697	12	0	74
2242	0.841649	0.158351	12	0	36
2317	0.853995	0.146005	12	0	74
2371	0.86634	0.13366	12	0	53
2424	0.876928	0.123072	12	0.142402	52
2487	0.887402	0.112598	12	0.151629	62
2527	0.899747	0.100253	12	0	39
2614	0.912093	0.0879068	12	0	86
2707	0.924091	0.0759087	12	0.0281541	92
2714	0.924334	0.0756656	12	0.980309	6
2718	0.924348	0.0756517	12	0.998876	3
2786	0.933697	0.0663029	12	0.242744	67
2965	0.9448	0.0552001	12	0.100672	178
3079	0.955611	0.0443894	12	0.124336	113
3083	0.955611	0.0443894	12	0.999999	3
3194	0.96366	0.0363398	12	0.347977	110
3197	0.963661	0.0363393	12	0.999961	2
3199	0.963661	0.0363393	12	1	1
3202	0.963709	0.0362914	12	0.996126	2
3375	0.972534	0.027466	12	0.285138	172
3377	0.972534	0.027466	12	1	1
3628	0.981324	0.0186756	12	0.287979	250
3639	0.981492	0.0185085	12	0.986463	10
3645	0.982393	0.0176075	12	0.927019	5
91	0.0123457	0.987654	13	0	90
101	0.0243661	0.975634	13	0.0263495	9
124	0.0367117	0.963288	13	0	22
152	0.0490574	0.950943	13	0	27
181	0.0614031	0.938597	13	0	28
183	0.0614031	0.938597	13	1	1
188	0.0674523	0.932548	13	0.510013	4
192	0.0693994	0.930601	13	0.842282	3
195	0.0708601	0.92914	13	0.881689	2
204	0.0832058	0.916794	13	0	8
214	0.0955514	0.904449	13	0	9
226	0.106898	0.893102	13	0.080961	11
233	0.109368	0.890632	13	0.799912	6
267	0.121714	0.878286	13	0	33
274	0.131688	0.868312	13	0.19205	6
276	0.131688	0.868312	13	1	1
279	0.132568	0.867432	13	0.928745	2
293	0.144914	0.855086	13	0	13
303	0.152431	0.847569	13	0.391093	9
330	0.164777	0.835223	13	0	26
350	0.177122	0.822878	13	0	19
373	0.189468	0.810532	13	0	22
402	0.201814	0.798186	13	0	28
414	0.209658	0.790342	13	0.364583	11
430	0.222004	0.777996	13	0	15
436	0.231159	0.768841	13	0.258437	5
440	0.231582	0.768418	13	0.965734	3
476	0.243928	0.756072	13	0	35
478	0.243928	0.756072	13	1	1
528	0.256273	0.743727	13	0	49
544	0.268619	0.731381	13	0	15
549	0.271634	0.728366	13	0.755834	4
559	0.283746	0.716254	13	0.0189269	9
561	0.283746	0.716254	13	1	1
571	0.291318	0.708682	13	0.386622	9
577	0.30097	0.69903	13	0.218218	5
582	0.306481	0.693519	13	0.553617	4
606	0.318826	0.681174	13	0	23
643	0.331172	0.668828	13	0	36
681	0.343518	0.656482	13	0	37
722	0.355863	0.644137	13	0	40
724	0.355863	0.644137	13	1	1
730	0.359668	0.640332	13	0.691825	5
751	0.372014	0.627986	13	0	20
753	0.372014	0.627986	13	1	1
756	0.372017	0.627983	13	0.999759	2
770	0.379911	0.620089	13	0.360557	13
811	0.392257	0.607743	13	0	40
831	0.404602	0.595398	13	0	19
851	0.416948	0.583052	13	0	19
868	0.427298	0.572702	13	0.161668	16
870	0.427298	0.572702	13	1	1
874	0.428476	0.571524	13	0.904578	3
878	0.42987	0.57013	13	0.887038	3
881	0.429971	0.570029	13	0.991865	2
897	0.441144	0.558856	13	0.0949738	15
917	0.45349	0.54651	13	0	19
981	0.465835	0.534165	13	0	63
1018	0.478181	0.521819	13	0	36
1044	0.490527	0.509473	13	0	25
1050	0.492936	0.507064	13	0.804843	5
1052	0.492936	0.507064	13	1	1
1103	0.505282	0.494718	13	0	50
1122	0.517628	0.482372	13	0	18
1186	0.529973	0.470027	13	0	63
1203	0.539817	0.460183	13	0.202664	16
1206	0.541063	0.458937	13	0.899068	2
1340	0.553409	0.446591	13	0	133
1342	0.553409	0.446591	13	1	1
1349	0.557177	0.442823	13	0.694766	6
1351	0.557177	0.442823	13	1	1
1359	0.561648	0.438352	13	0.637845	7
1362	0.562088	0.437912	13	0.964392	2
1385	0.571621	0.428379	13	0.227824	22
1388	0.571798	0.428202	13	0.985622	2
1425	0.584144	0.415856	13	0	36
1474	0.596489	0.403511	13	0	48
1527	0.608835	0.391165	13	0	52
1529	0.608835	0.391165	13	1	1
1576	0.621181	0.378819	13	0	46
1589	0.628853	0.371147	13	0.378535	12
1591	0.628853	0.371147	13	1	1
1636	0.641199	0.358801	13	0	44
1658	0.648455	0.351545	13	0.412236	21
1660	0.648455	0.351545	13	1	1
1662	0.648455	0.351545	13	1	1
1697	0.660801	0.339199	13	0	34
1699	0.660801	0.339199	13	1	1
1757	0.673147	0.326853	13	0	57
1759	0.673147	0.326853	13	1	1
1805	0.685492	0.314508	13	0	45
1847	0.697838	0.302162	13	0	41
1931	0.710184	0.289816	13	0	83
1935	0.711704	0.288296	13	0.876878	3
1938	0.711839	0.288161	13	0.989011	2
1970	0.724185	0.275815	13	0	31
2027	0.736531	0.263469	13	0	56
2051	0.745734	0.254266	13	0.254494	23
2099	0.755848	0.244152	13	0.180838	47
2101	0.755848	0.244152	13	1	1
2103	0.755848	0.244152	13	1	1
2151	0.768193	0.231807	13	0	47
2153	0.768193	0.231807	13	1	1
2155	0.768193	0.231807	13	1	1
2202	0.780539	0.219461	13	0	46
2204	0.780539	0.219461	13	1	1
2207	0.780546	0.219454	13	0.999449	2
2212	0.78317	0.21683	13	0.787408	4
2228	0.787632	0.212368	13	0.638584	15
2299	0.799978	0.200022	13	0	70
2301	0.799978	0.200022	13	1	1
2365	0.812324	0.187676	13	0	63
2423	0.824669	0.175331	13	0	57
2446	0.834969	0.165031	13	0.165751	22
2499	0.847314	0.152686	13	0	52
2502	0.847328	0.152672	13	0.998899	2
2504	0.847328	0.152672	13	1	1
2548	0.857046	0.142954	13	0.212876	43
2552	0.857447	0.142553	13	0.967454	3
2554	0.857447	0.142553	13	1	1
2556	0.857447	0.142553	13	1	1
2558	0.857447	0.142553	13	1	1
2560	0.857447	0.142553	13	1	1
2611	0.869793	0.130207	13	0	50
2614	0.869877	0.130123	13	0.993177	2
2665	0.879295	0.120705	13	0.237171	50
2671	0.881199	0.118801	13	0.845753	5
2752	0.893545	0.106455	13	0	80
2757	0.894093	0.105907	13	0.955593	4
2759	0.894093	0.105907	13	1	1
2761	0.894093	0.105907	13	1	1
2866	0.906439	0.0935612	13	0	104
2911	0.914847	0.0851528	13	0.318919	44
2984	0.922465	0.0775352	13	0.382975	72
3092	0.931546	0.0684536	13	0.264384	107
3182	0.940503	0.0594972	13	0.274537	89
3184	0.940503	0.0594972	13	1	1
3186	0.940503	0.0594972	13	1	1
3190	0.940532	0.0594675	13	0.997593	3
3338	0.949379	0.0506214	13	0.283464	147
3589	0.957696	0.0423036	13	0.326254	250
3774	0.969619	0.0303806	13	0.0342417	184
3956	0.977676	0.0223241	13	0.347427	181
3959	0.97771	0.0222897	13	0.997211	2
19	0.0123457	0.987654	14	0	18
21	0.0123457	0.987654	14	1	1
26	0.0154793	0.984521	14	0.746176	4
47	0.027825	0.972175	14	0	20
65	0.0401707	0.959829	14	0	17
67	0.0401707	0.959829	14	1	1
114	0.0525163	0.947484	14	0	46
130	0.064862	0.935138	14	0	15
132	0.064862	0.935138	14	1	1
165	0.0772077	0.922792	14	0	32
167	0.0772077	0.922792	14	1	1
175	0.0853917	0.914608	14	0.3371	7
202	0.0977373	0.902263	14	0	26
233	0.110083	0.889917	14	0	30
235	0.110083	0.889917	14	1	1
245	0.118567	0.881433	14	0.312824	9
272	0.130912	0.869088	14	0	26
281	0.136077	0.863923	14	0.581673	8
319	0.148423	0.851577	14	0	37
324	0.150237	0.849763	14	0.853062	4
328	0.153847	0.846153	14	0.707581	3
330	0.153847	0.846153	14	1	1
366	0.166192	0.833808	14	0	35
371	0.178538	0.821462	14	0	4
383	0.189629	0.810371	14	0.101637	11
385	0.189629	0.810371	14	1	1
387	0.189629	0.810371	14	1	1
390	0.192576	0.807424	14	0.761282	2
397	0.199571	0.800429	14	0.433417	6
438	0.211917	0.788083	14	0	40
441	0.212168	0.787832	14	0.979602	2
454	0.224514	0.775486	14	0	12
494	0.23686	0.76314	14	0	39
548	0.249206	0.750794	14	0	53
565	0.261551	0.738449	14	0	16
567	0.261551	0.738449	14	1	1
574	0.268249	0.731751	14	0.457484	6
580	0.272312	0.727688	14	0.670876	5
583	0.273573	0.726427	14	0.897866	2
610	0.285919	0.714081	14	0	26
639	0.298264	0.701736	14	0	28
643	0.304114	0.695886	14	0.526211	3
646	0.304737	0.695263	14	0.949497	2
669	0.317083	0.682917	14	0	22
688	0.326916	0.673084	14	0.203497	18
693	0.328169	0.671831	14	0.898529	4
703	0.336284	0.663716	14	0.342687	9
733	0.34863	0.65137	14	0	29
768	0.360975	0.639025	14	0	34
833	0.373321	0.626679	14	0	64
843	0.379896	0.620104	14	0.467441	9
848	0.385335	0.614665	14	0.559413	4
850	0.385335	0.614665	14	1	1
862	0.397681	0.602319	14	0	11
873	0.410026	0.589974	14	0	10
875	0.410026	0.589974	14	1	1
890	0.422372	0.577628	14	0	14
905	0.434718	0.565282	14	0	14
907	0.434718	0.565282	14	1	1
909	0.434718	0.565282	14	1	1
914	0.436893	0.563107	14	0.823823	4
916	0.436893	0.563107	14	1	1
934	0.449239	0.550761	14	0	17
956	0.461584	0.538416	14	0	21
958	0.461584	0.538416	14	1	1
960	0.461584	0.538416	14	1	1
1031	0.47393	0.52607	14	0	70
1033	0.47393	0.52607	14	1	1
1035	0.47393	0.52607	14	1	1
1037	0.47393	0.52607	14	1	1
1065	0.486276	0.513724	14	0	27
1071	0.49035	0.50965	14	0.669989	5
1139	0.502695	0.497305	14	0	67
1147	0.506845	0.493155	14	0.663858	7
1149	0.506845	0.493155	14	1	1
1151	0.506845	0.493155	14	1	1
1154	0.507015	0.492985	14	0.986228	2
1212	0.519361	0.480639	14	0	57
1214	0.519361	0.480639	14	1	1
1216	0.519361	0.480639	14	1	1
1219	0.521088	0.478912	14	0.860081	2
1224	0.52281	0.47719	14	0.860538	4
1226	0.52281	0.47719	14	1	1
1232	0.523708	0.476292	14	0.927245	5
1237	0.524514	0.475486	14	0.934775	4
1245	0.527284	0.472716	14	0.775613	7
1247	0.527284	0.472716	14	1	1
1339	0.53963	0.46037	14	0	91
1349	0.551975	0.448025	14	0	9
1352	0.558068	0.441932	14	0.506489	2
1356	0.559202	0.440798	14	0.908121	3
1390	0.571548	0.428452	14	0	33
1392	0.571548	0.428452	14	1	1
1396	0.573056	0.426944	14	0.877868	3
1400	0.573414	0.426586	14	0.971009	3
1418	0.585759	0.414241	14	0	17
1420	0.585759	0.414241	14	1	1
1422	0.585759	0.414241	14	1	1
1476	0.598105	0.401895	14	0	53
1492	0.608855	0.391145	14	0.129274	15
1494	0.608855	0.391145	14	1	1
1506	0.61834	0.38166	14	0.23169	11
1553	0.630686	0.369314	14	0	46
1627	0.643031	0.356969	14	0	73
1630	0.644602	0.355398	14	0.872806	2
1632	0.644602	0.355398	14	1	1
1671	0.656947	0.343053	14	0	38
1675	0.658035	0.341965	14	0.911895	3
1677	0.658035	0.341965	14	1	1
1679	0.658035	0.341965	14	1	1
1682	0.658614	0.341386	14	0.953127	2
1688	0.660461	0.339539	14	0.850411	5
1712	0.672806	0.327194	14	0	23
1716	0.674027	0.325973	14	0.90109	3
1718	0.674027	0.325973	14	1	1
1758	0.686373	0.313627	14	0	39
1829	0.698719	0.301281	14	0	70
1834	0.700076	0.299924	14	0.890056	4
1860	0.711517	0.288483	14	0.0732573	25
1900	0.723863	0.276137	14	0	39
1902	0.723863	0.276137	14	1	1
1922	0.736209	0.263791	14	0	19
1950	0.748066	0.251934	14	0.039579	27
2093	0.760411	0.239589	14	0	142
2136	0.77272	0.22728	14	0.00303096	42
2160	0.783416	0.216584	14	0.133596	23
2222	0.795762	0.204238	14	0	61
2238	0.79876	0.20124	14	0.757164	15
2312	0.811105	0.188895	14	0	73
2314	0.811105	0.188895	14	1	1
2362	0.823451	0.176549	14	0	47
2364	0.823451	0.176549	14	1	1
2366	0.823451	0.176549	14	1	1
2511	0.835797	0.164203	14	0	144
2639	0.848142	0.151858	14	0	127
2729	0.860488	0.139512	14	0	89
2812	0.872834	0.127166	14	0	82
2822	0.874779	0.125221	14	0.842411	9
2891	0.886335	0.113665	14	0.064002	68
2904	0.887159	0.112841	14	0.933243	12
2910	0.887378	0.112622	14	0.982295	5
2938	0.896242	0.103758	14	0.281941	27
3101	0.908588	0.0914119	14	0	162
3218	0.919525	0.0804753	14	0.114141	116
3325	0.93078	0.0692198	14	0.0883056	106
3494	0.943126	0.0568742	14	0	168
3558	0.950383	0.0496166	14	0.412138	63
3727	0.960267	0.0397328	14	0.199415	168
3729	0.960267	0.0397328	14	1	1
3901	0.970146	0.029854	14	0.199815	171
57	0.0123457	0.987654	15	0	56
87	0.0246914	0.975309	15	0	29
89	0.0246914	0.975309	15	1	1
102	0.037037	0.962963	15	0	12
107	0.0389052	0.961095	15	0.848676	4
117	0.0471489	0.952851	15	0.332266	9
124	0.0561277	0.943872	15	0.272713	6
140	0.0684734	0.931527	15	0	15
164	0.0808191	0.919181	15	0	23
166	0.0808191	0.919181	15	1	1
199	0.0931648	0.906835	15	0	32
223	0.10551	0.89449	15	0	23
240	0.117856	0.882144	15	0	16
267	0.130202	0.869798	15	0	26
270	0.130473	0.869527	15	0.978044	2
272	0.130473	0.869527	15	1	1
296	0.142819	0.857181	15	0	23
305	0.150382	0.849618	15	0.387339	8
311	0.15972	0.84028	15	0.243662	5
319	0.170112	0.829888	15	0.158201	7
328	0.179389	0.820611	15	0.248617	8
344	0.191734	0.808266	15	0	15
351	0.199185	0.800815	15	0.396505	6
427	0.211531	0.788469	15	0	75
430	0.211827	0.788173	15	0.976023	2
443	0.224172	0.775828	15	0	12
453	0.233036	0.766964	15	0.282042	9
456	0.233249	0.766751	15	0.982776	2
469	0.242581	0.757419	15	0.244061	12
504	0.254927	0.745073	15	0	34
506	0.254927	0.745073	15	1	1
511	0.260534	0.739466	15	0.545783	4
522	0.27288	0.72712	15	0	10
526	0.274275	0.725725	15	0.887011	3
551	0.286621	0.713379	15	0	24
576	0.298966	0.701034	15	0	24
578	0.298966	0.701034	15	1	1
582	0.306346	0.693654	15	0.402243	3
584	0.306346	0.693654	15	1	1
626	0.318692	0.681308	15	0	41
[truncated: 25,899 more rows]
